# Supplementary material for: Phylogenetic Analysis of Some Species of the Anopheles hyrcanus Group (Diptera: Culicidae) in China Based on Complete Mitochondrial Genomes
Source: MDPI journal article supplement (doi:10.3390/genes14071453), 2023-07-16

An. belenrae

Alanine(ugc)

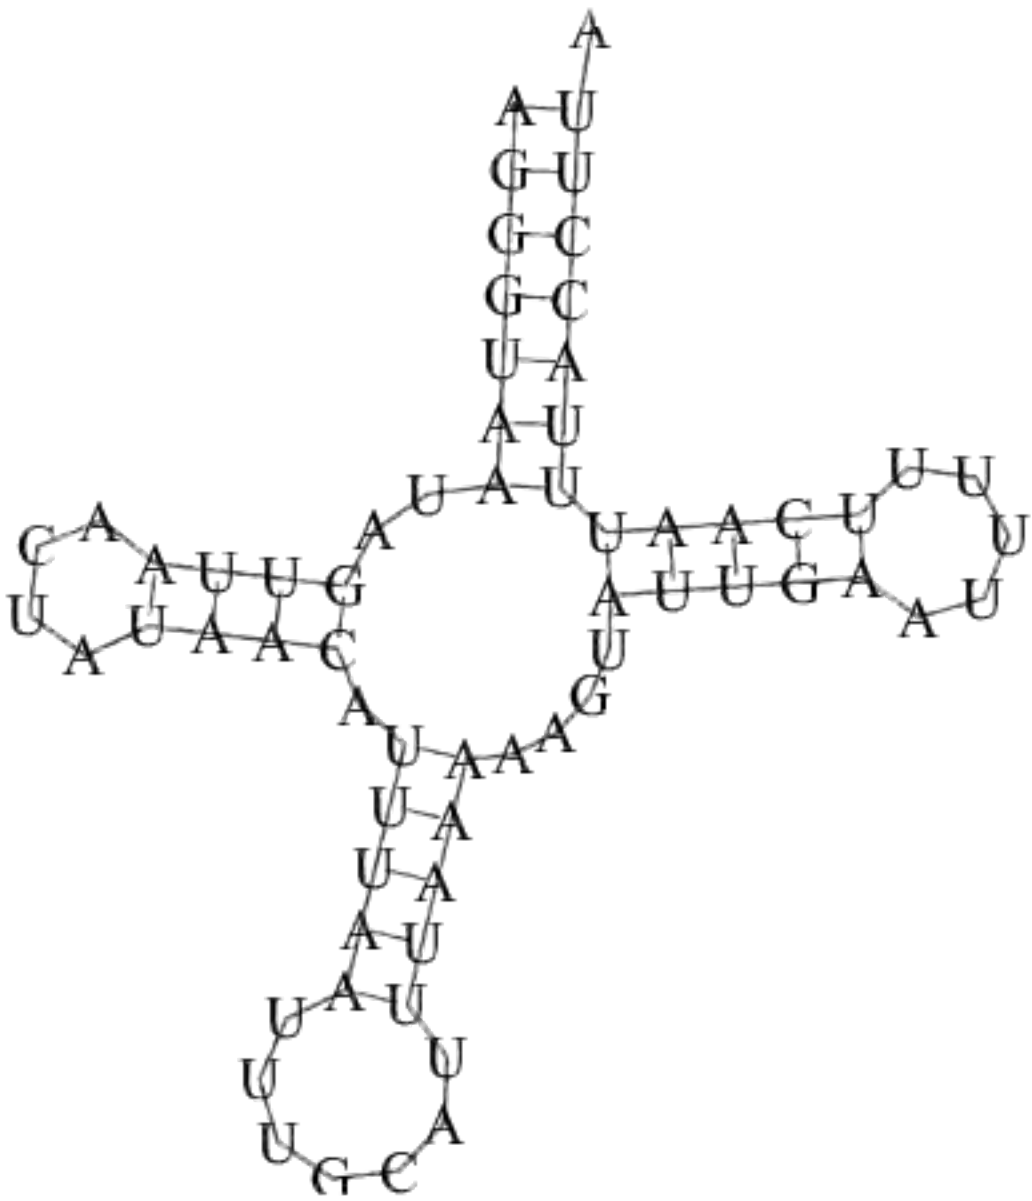

Arginine(ucg)

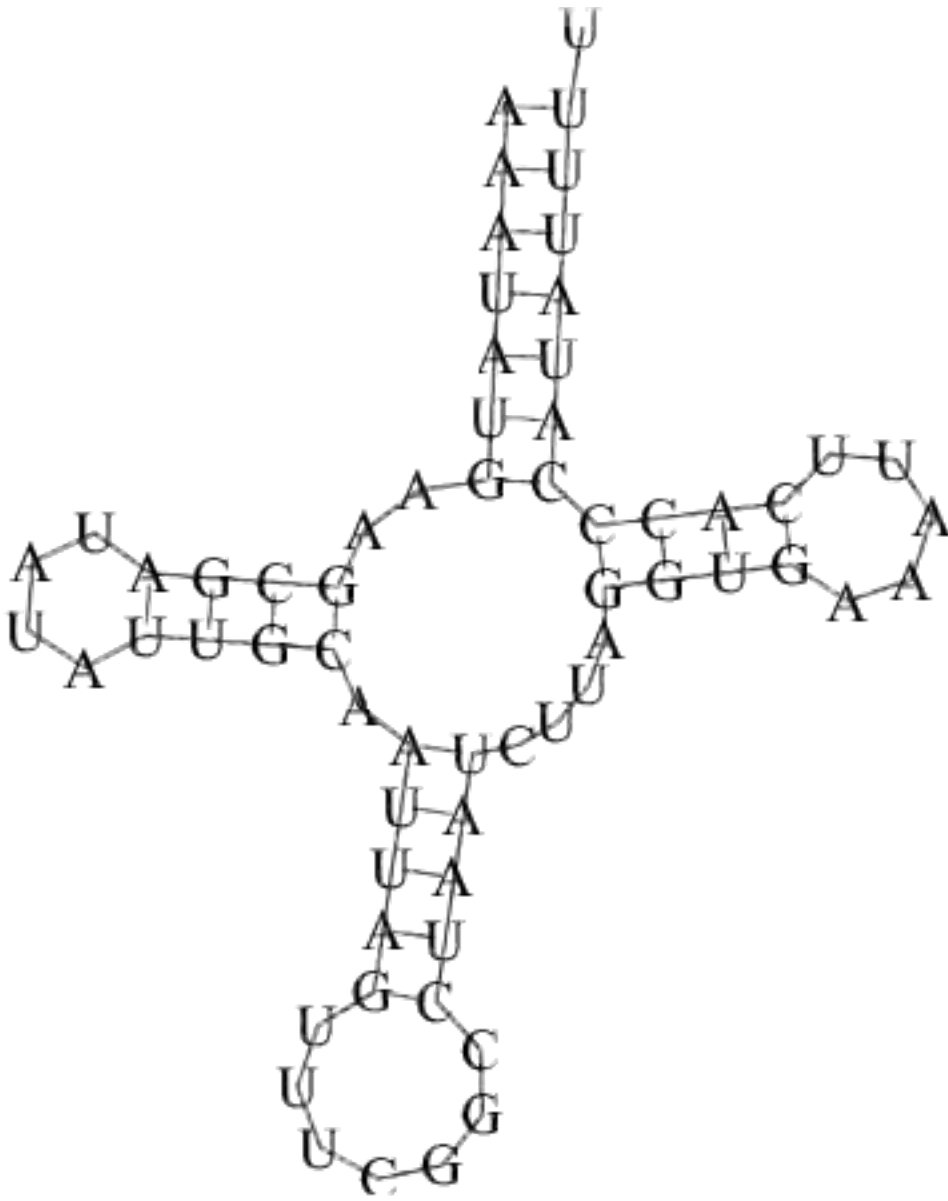

Asparagine(guu)

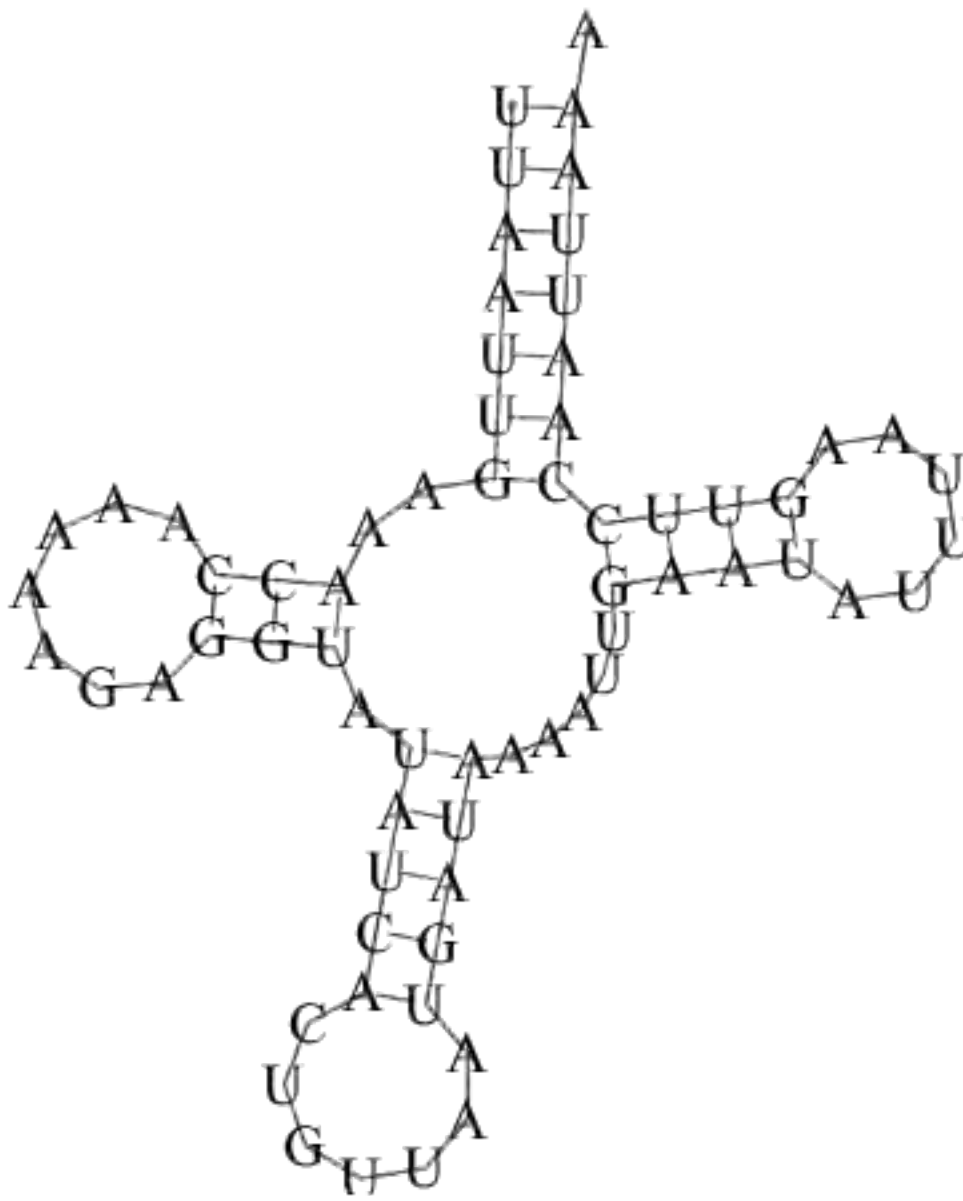

Aspartic acid(guc)

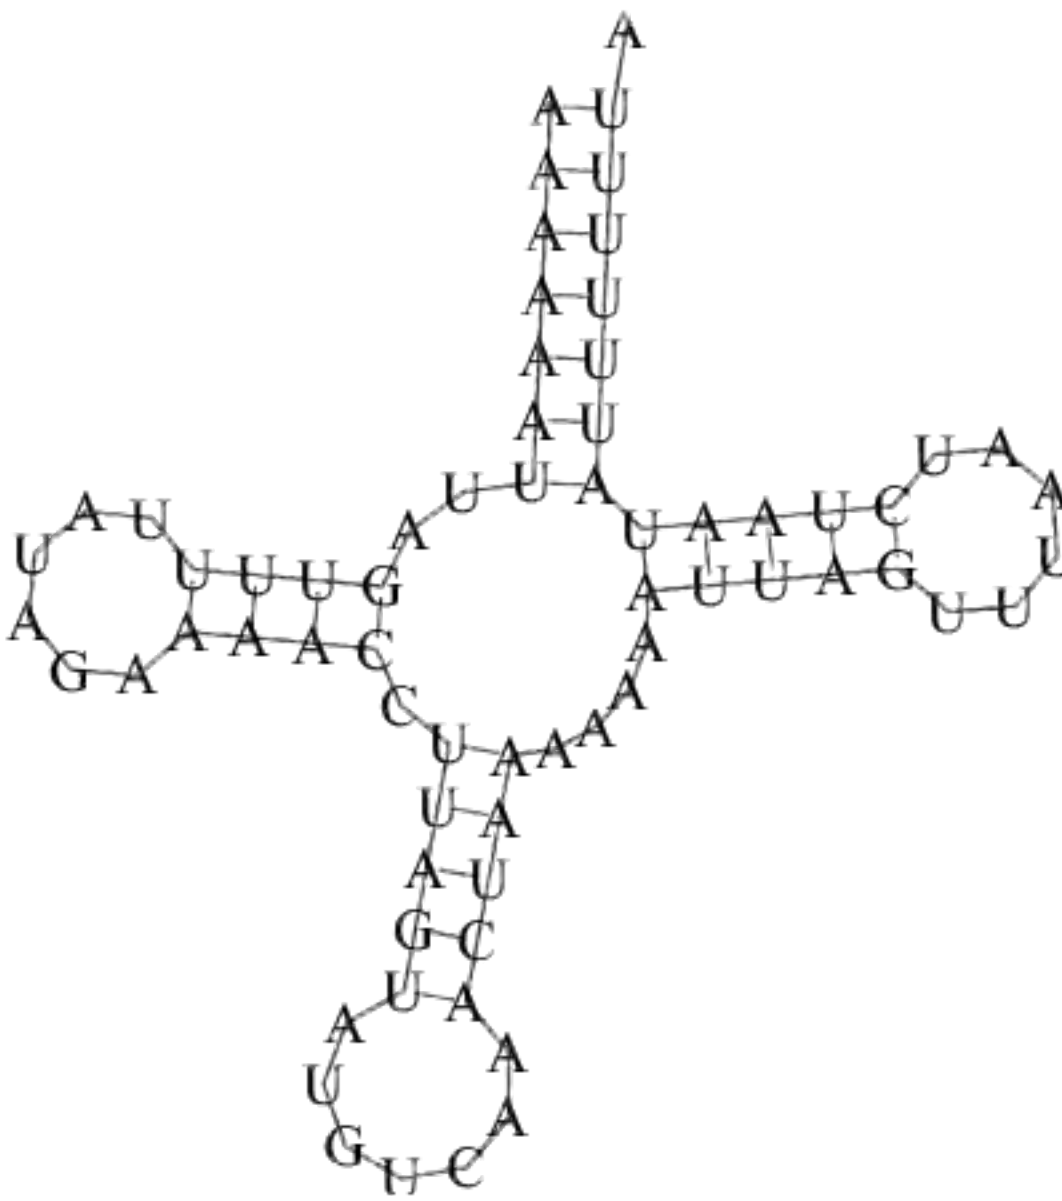

Cysteine(gca)

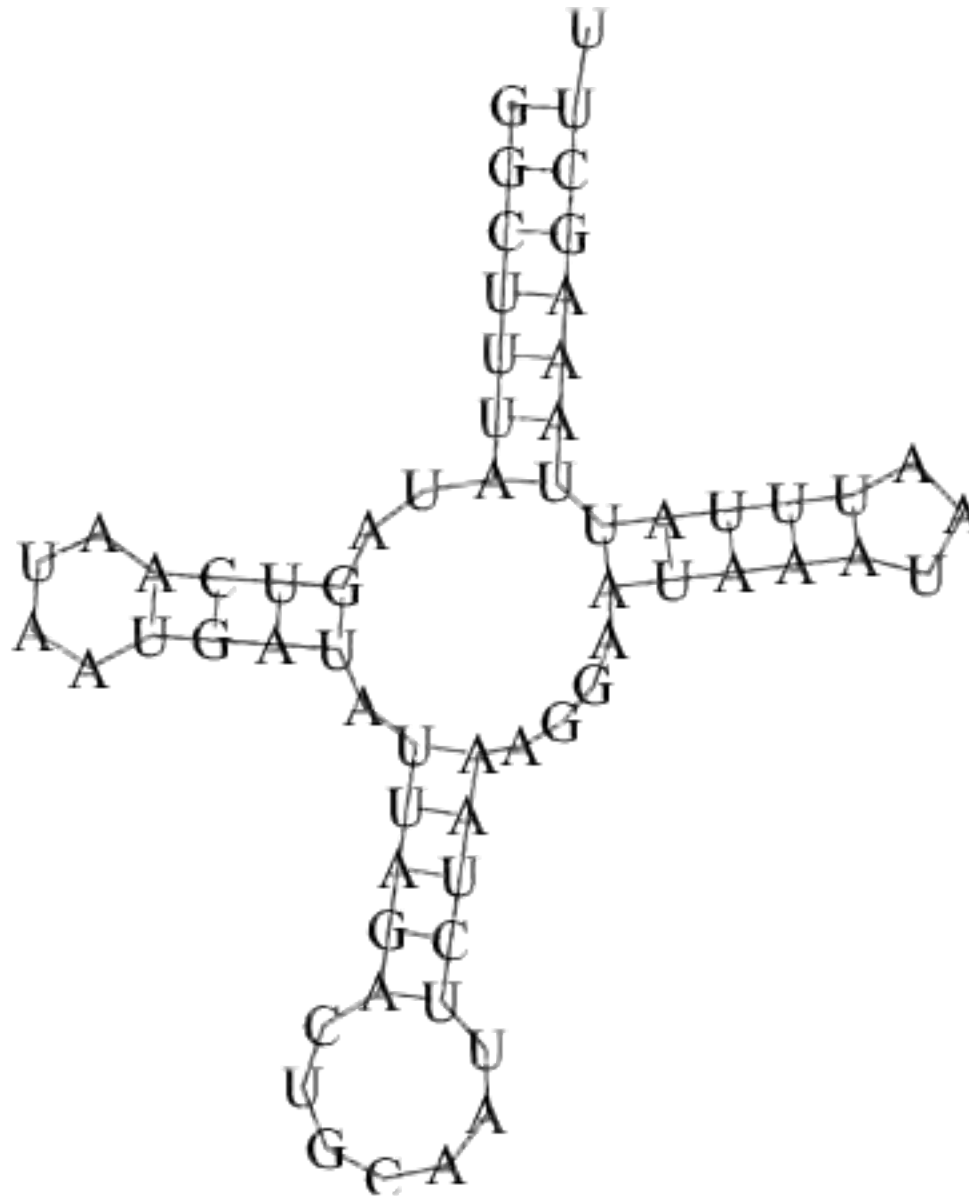

Glutamine(uuc)

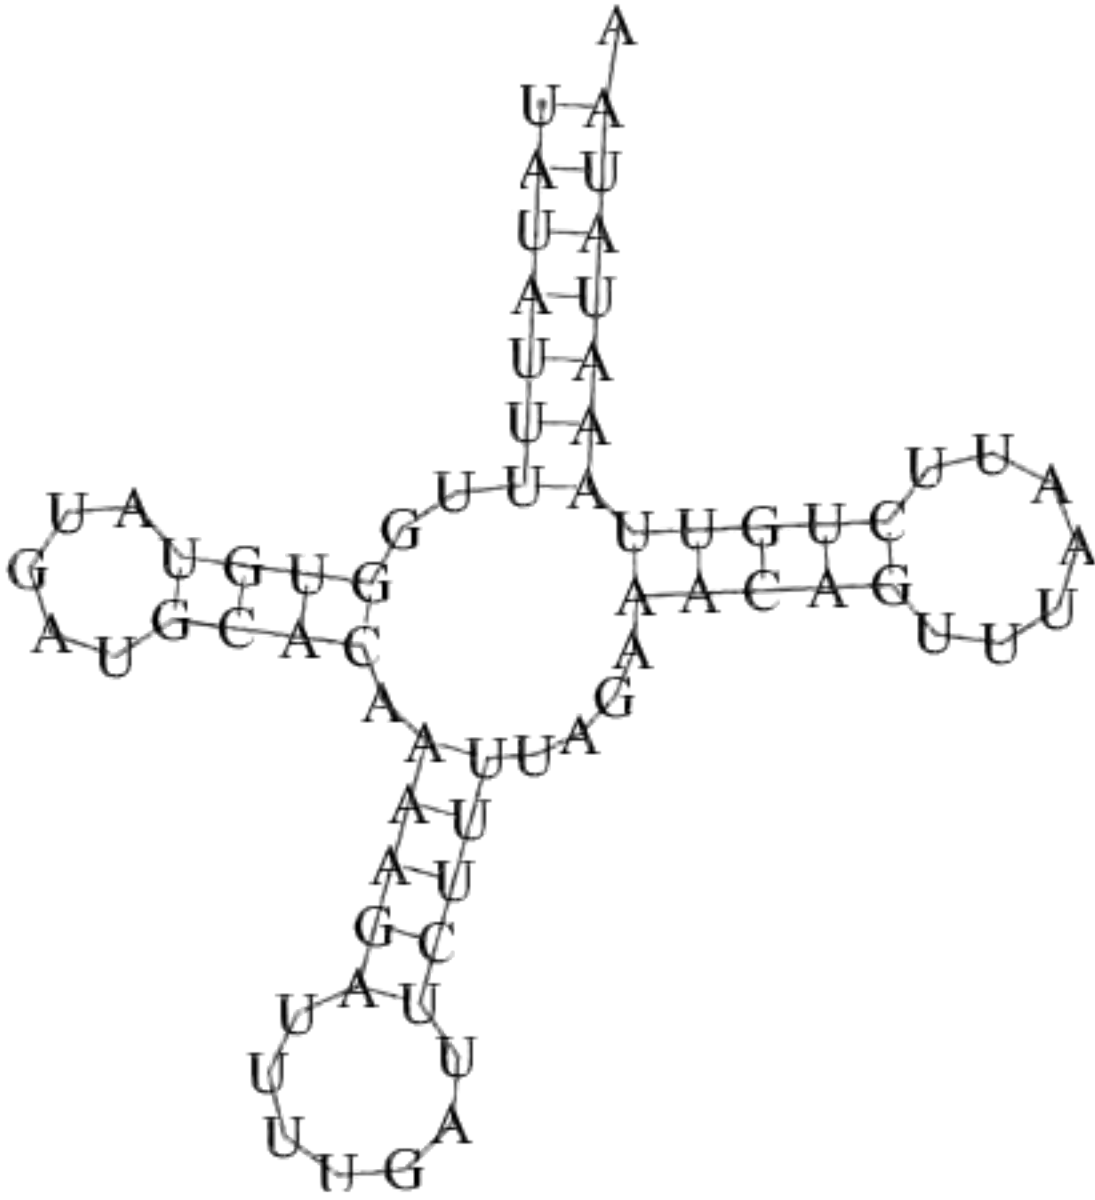

Glutamic acid(uug)

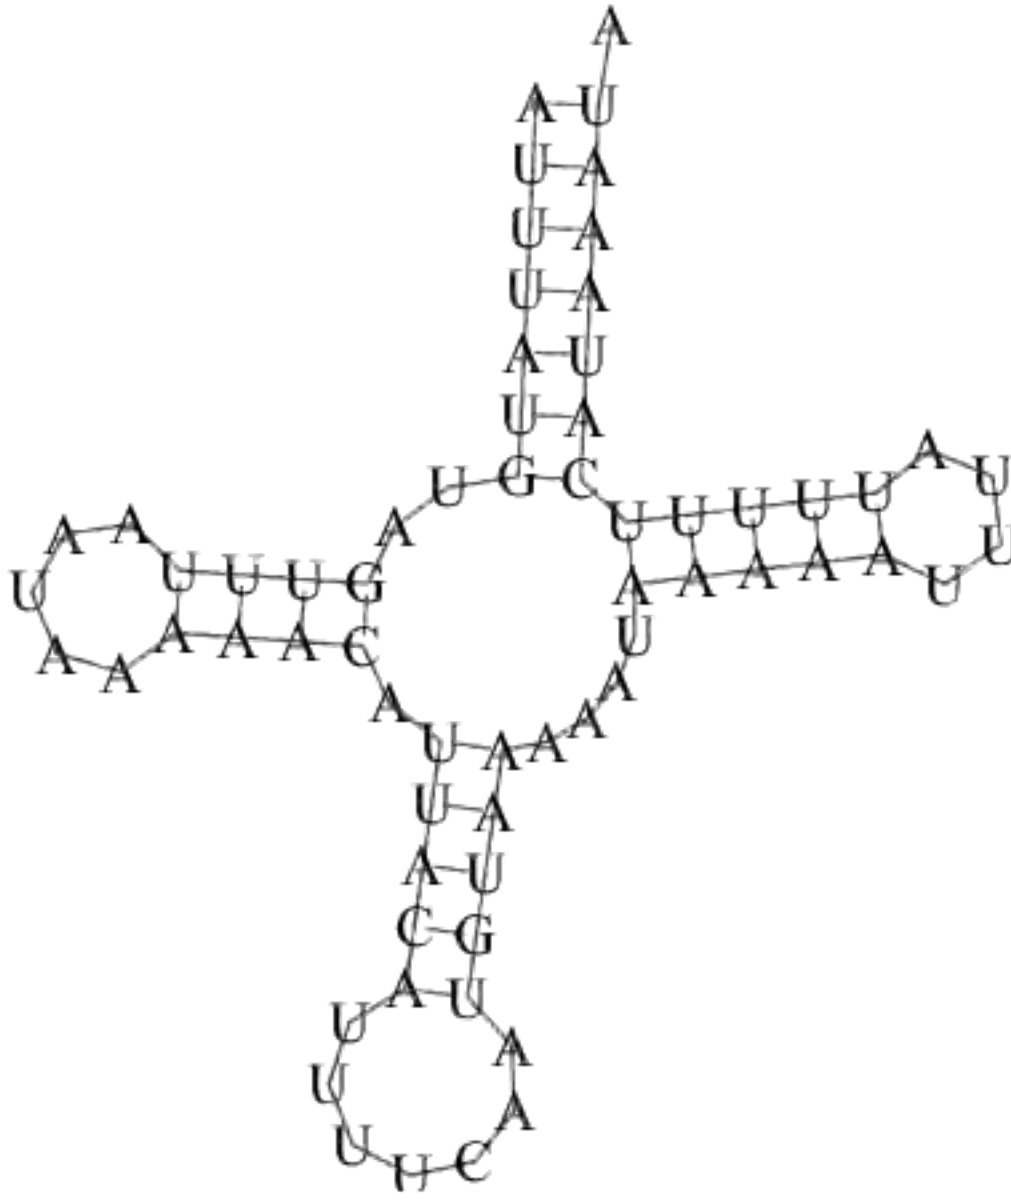

Glycine(ucc)

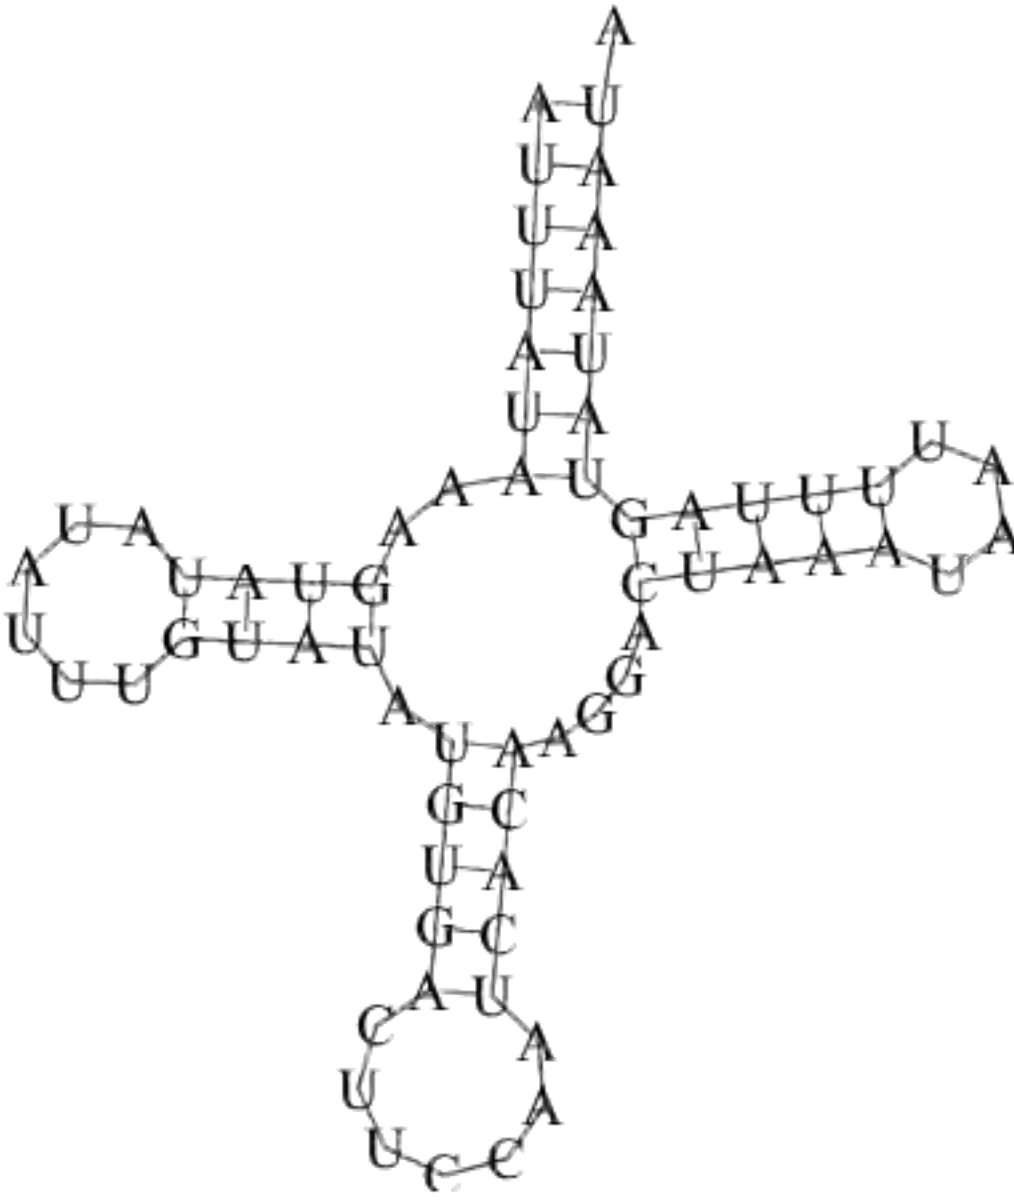

Histidine(gug)

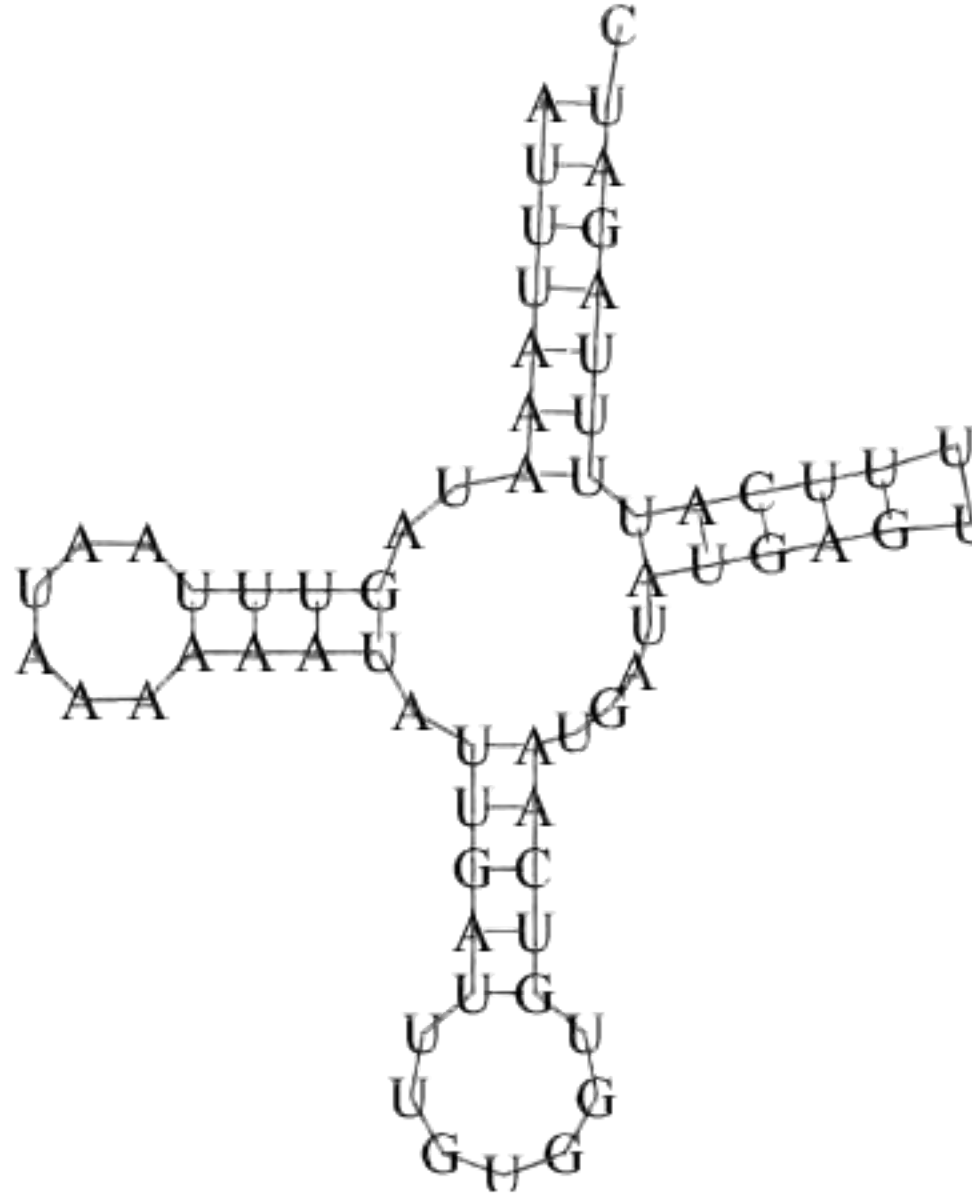

Isoleucine(gau)

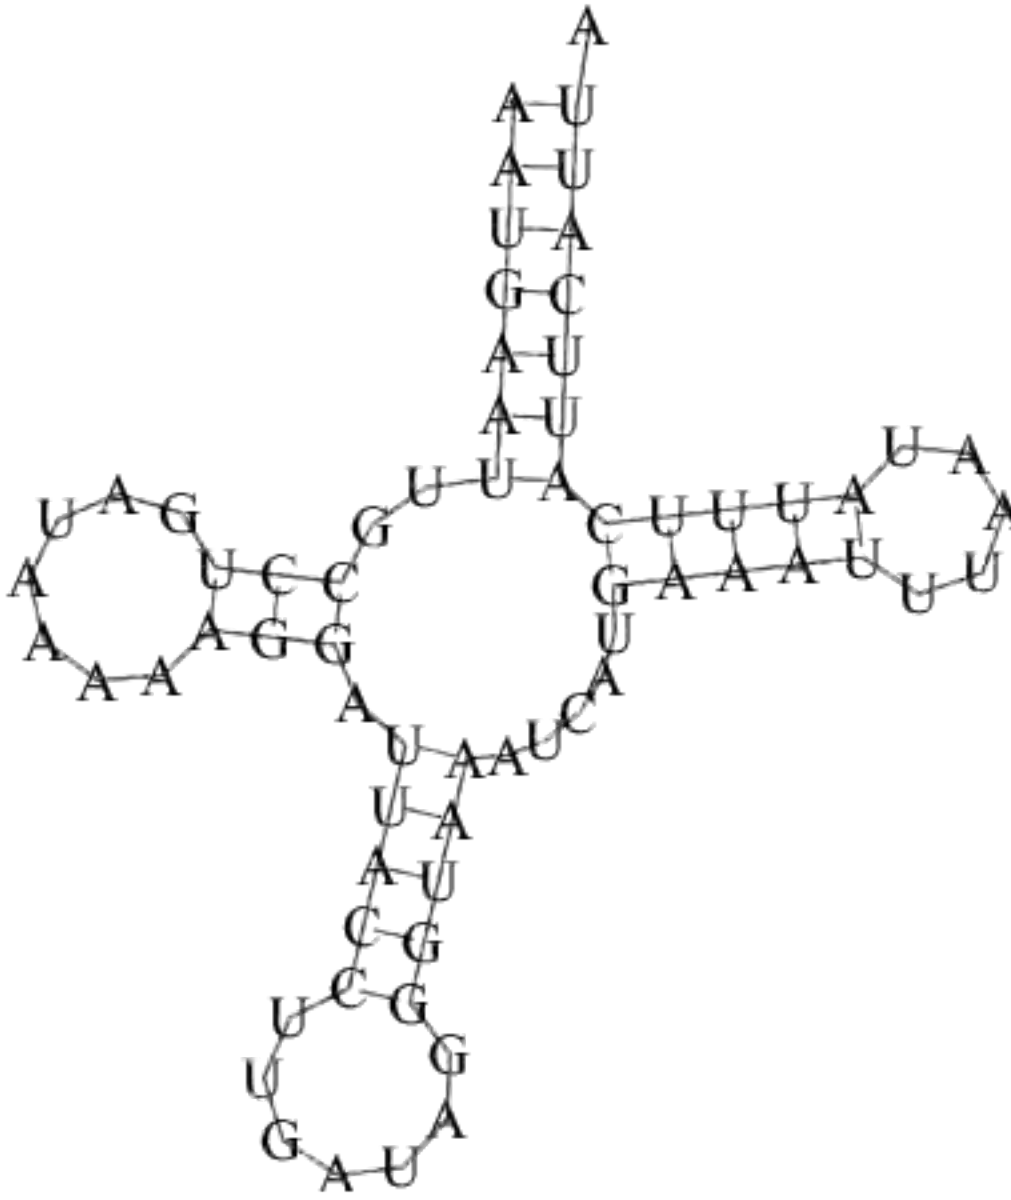

Leucine(uag)

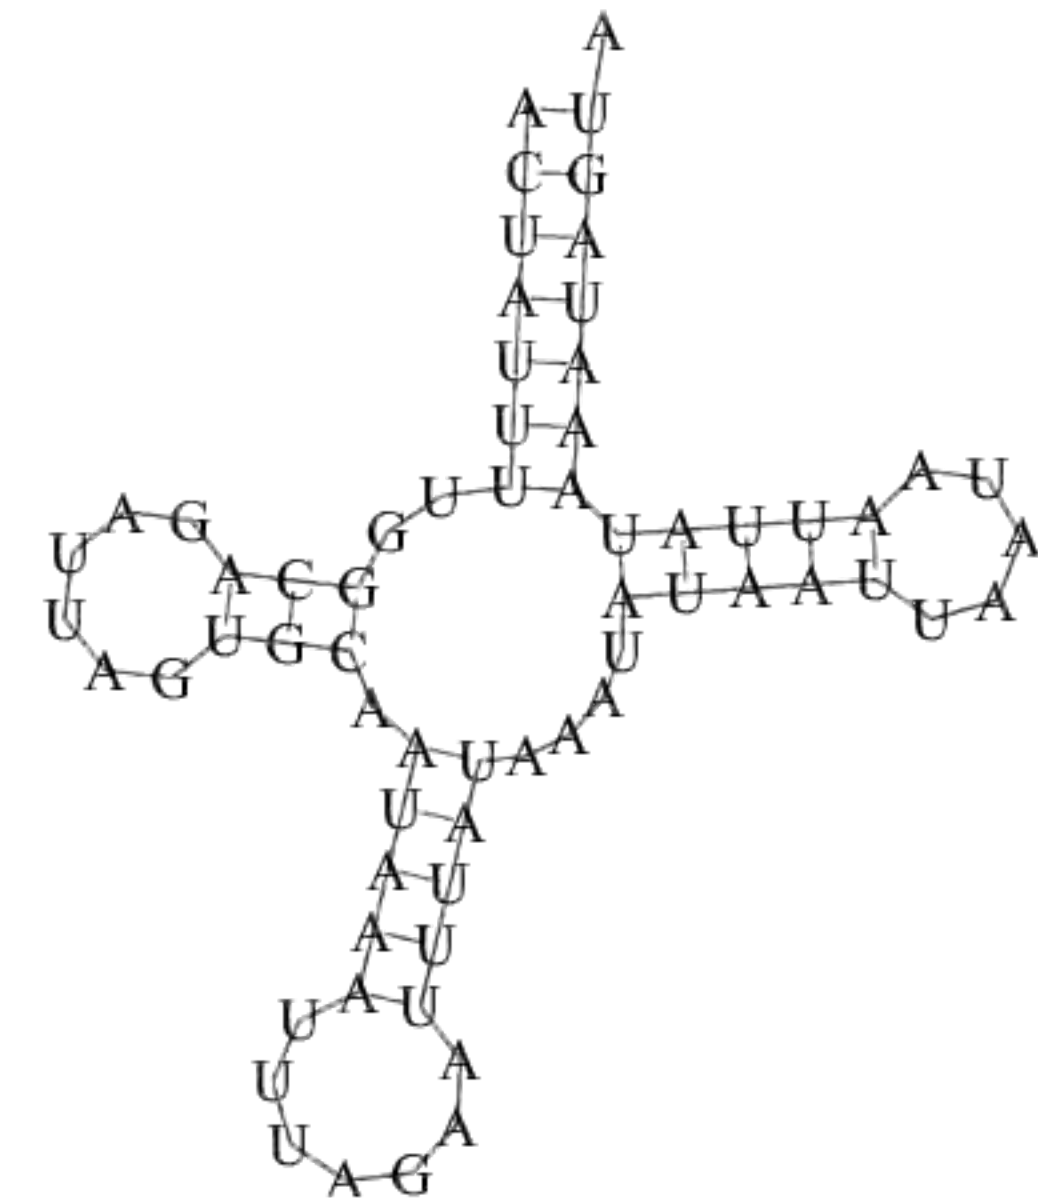

Leucine(uaa)

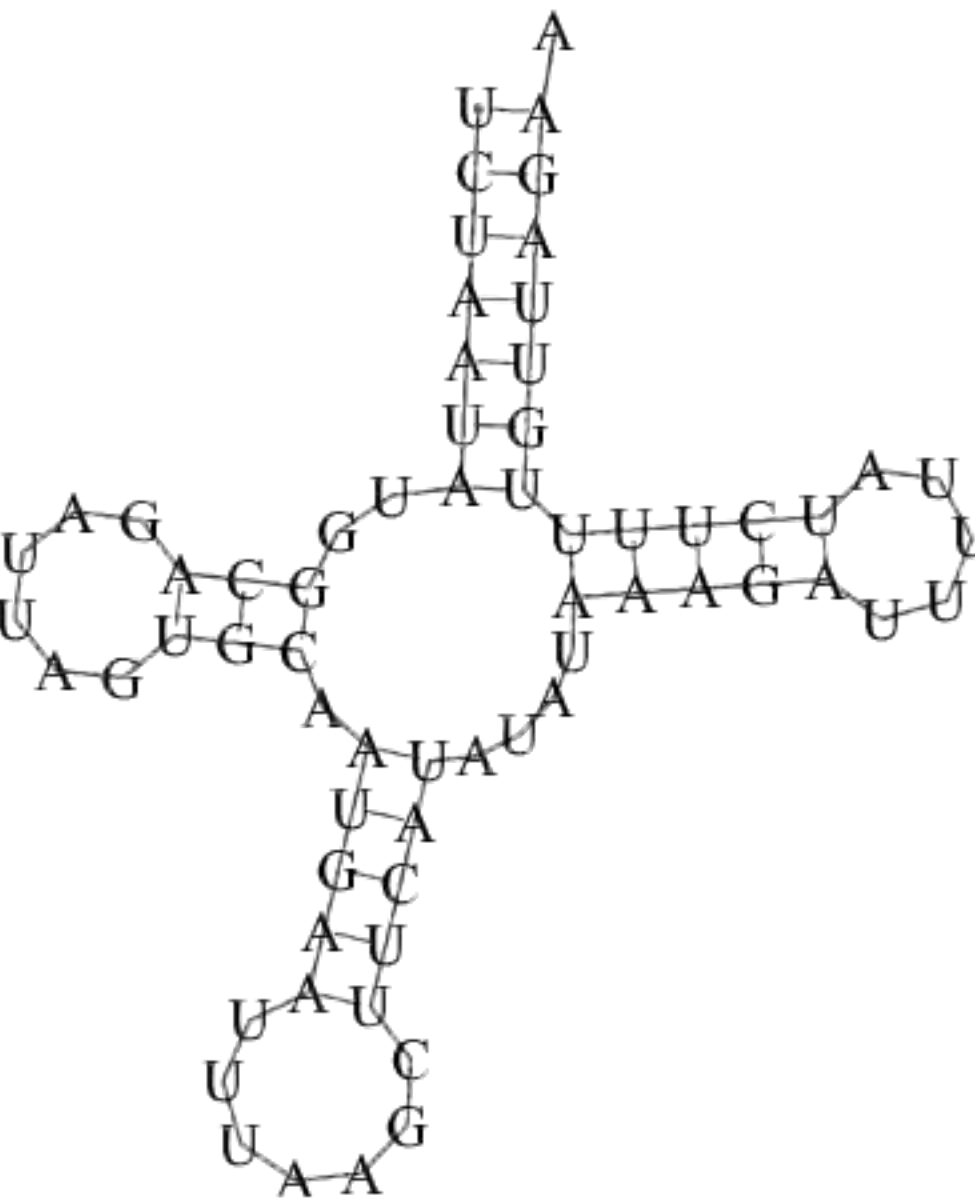

Lysine(cuu)

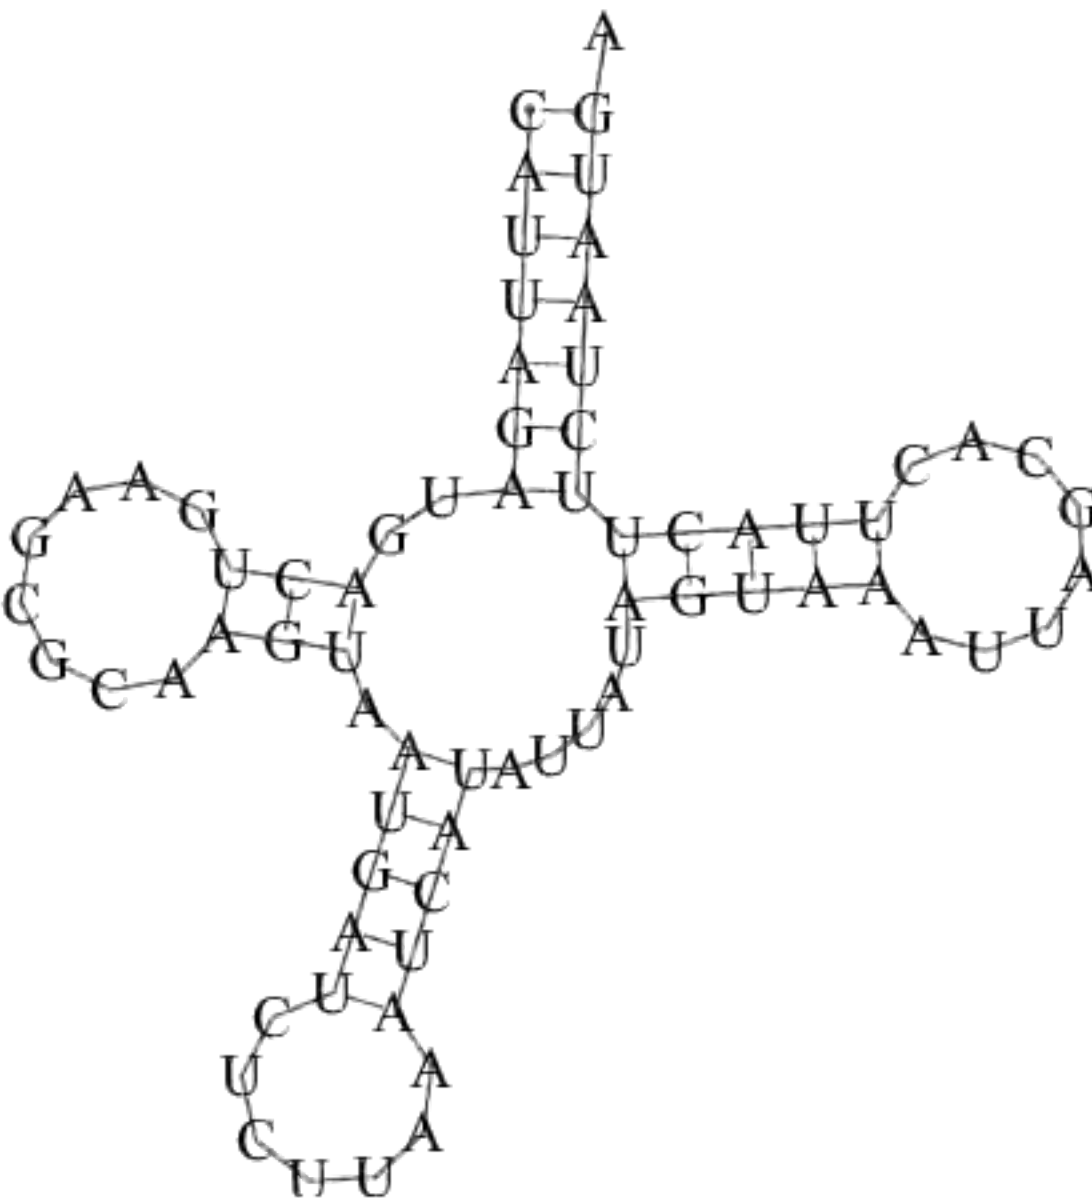

Methionine(cau)

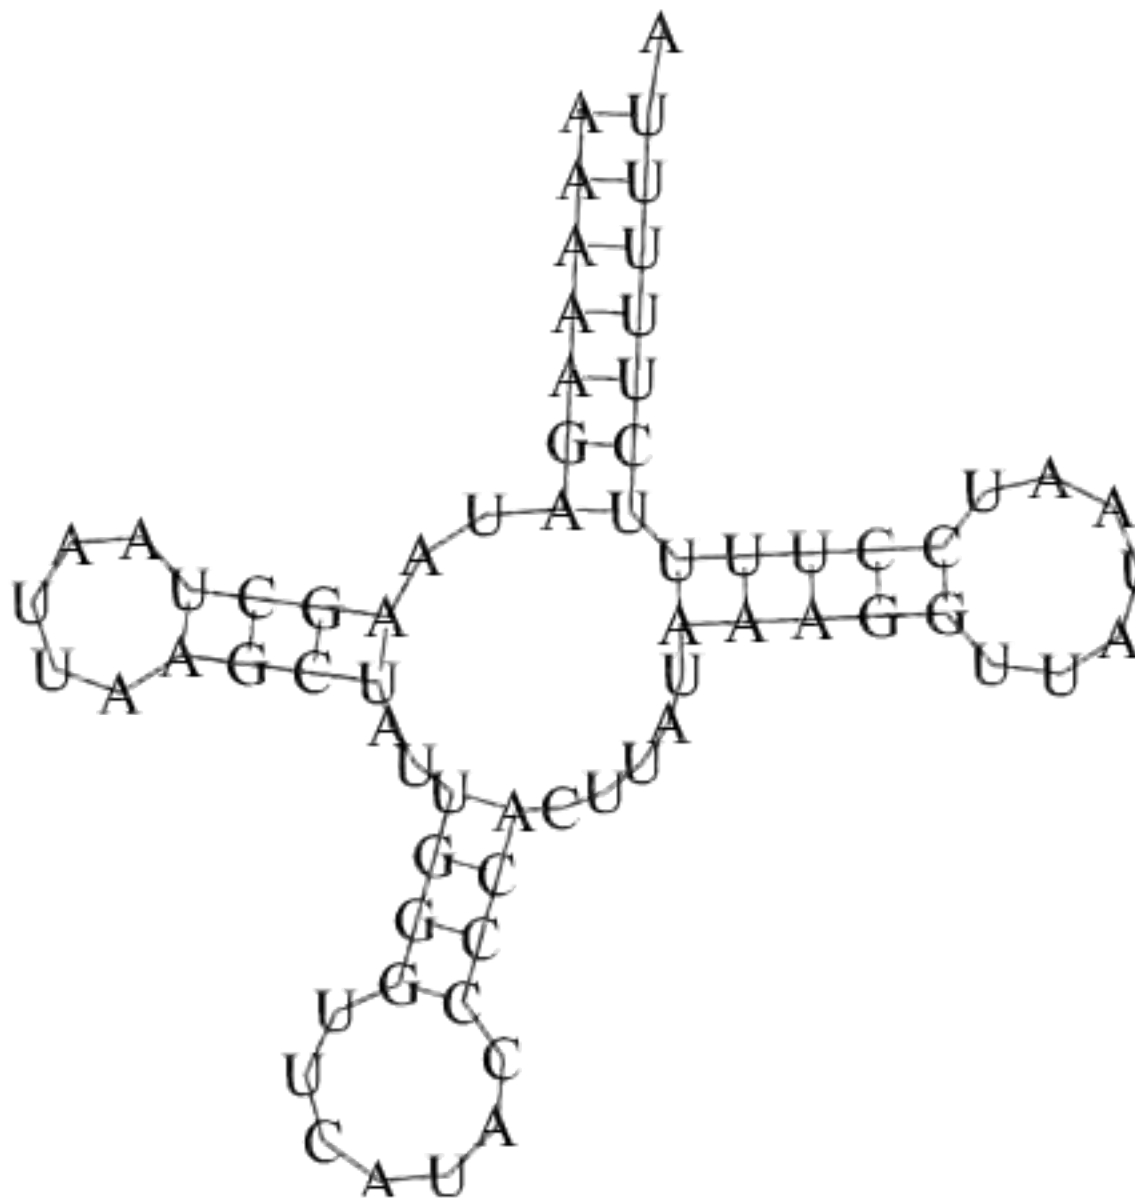

Phenylalanine(gaa)

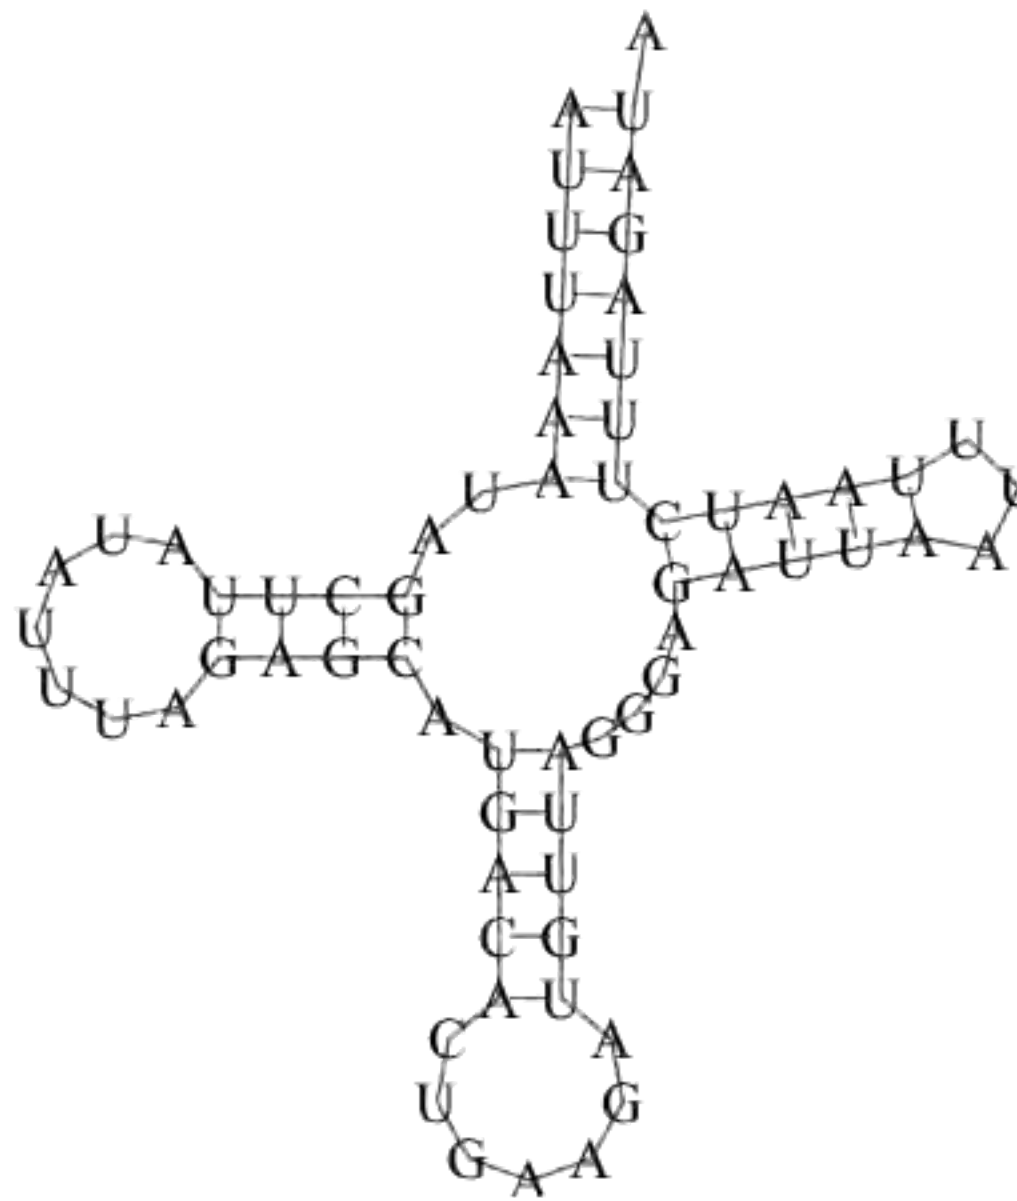

Proline(ugg)

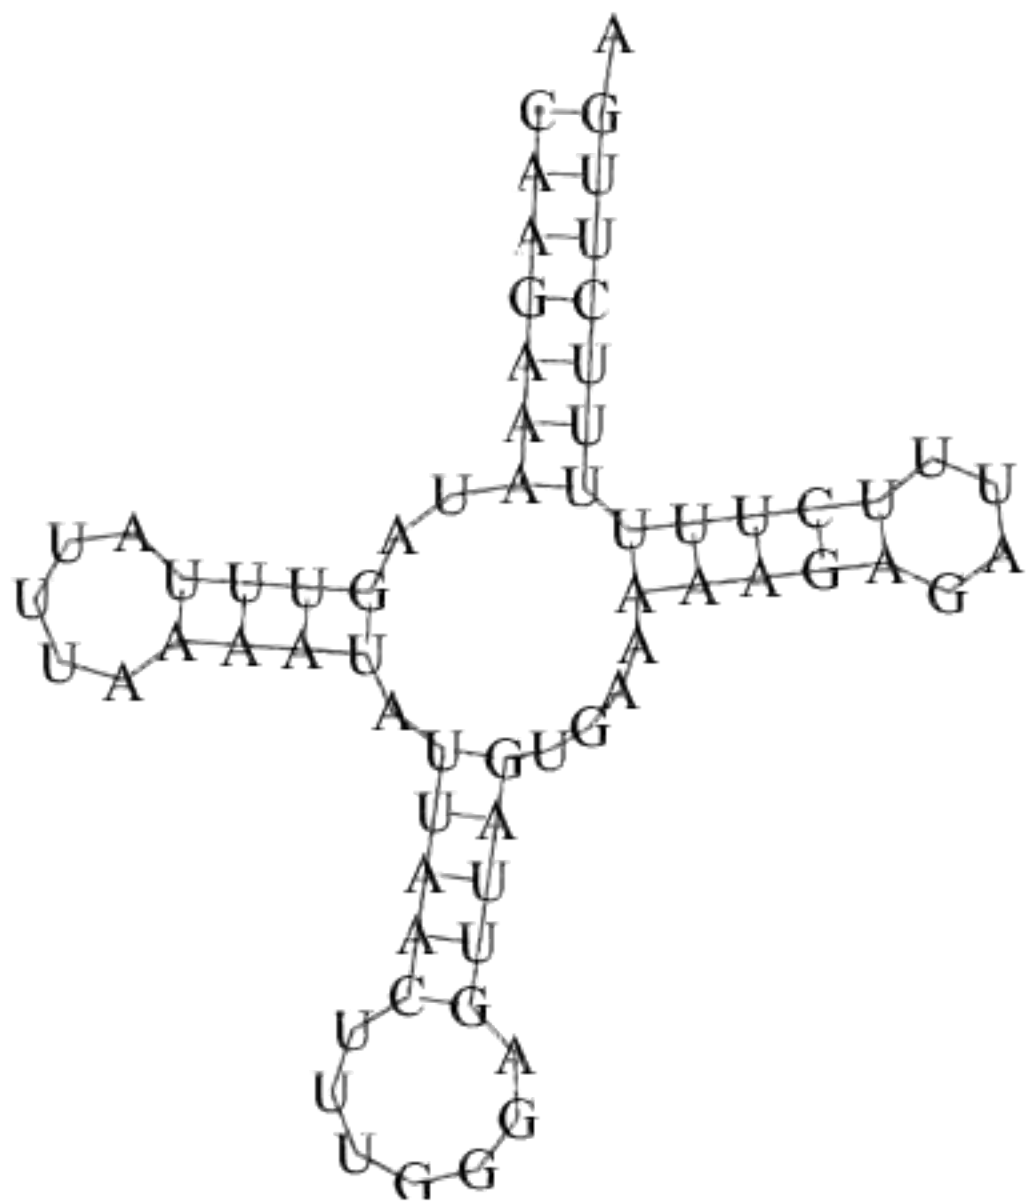

Serine(gcu)

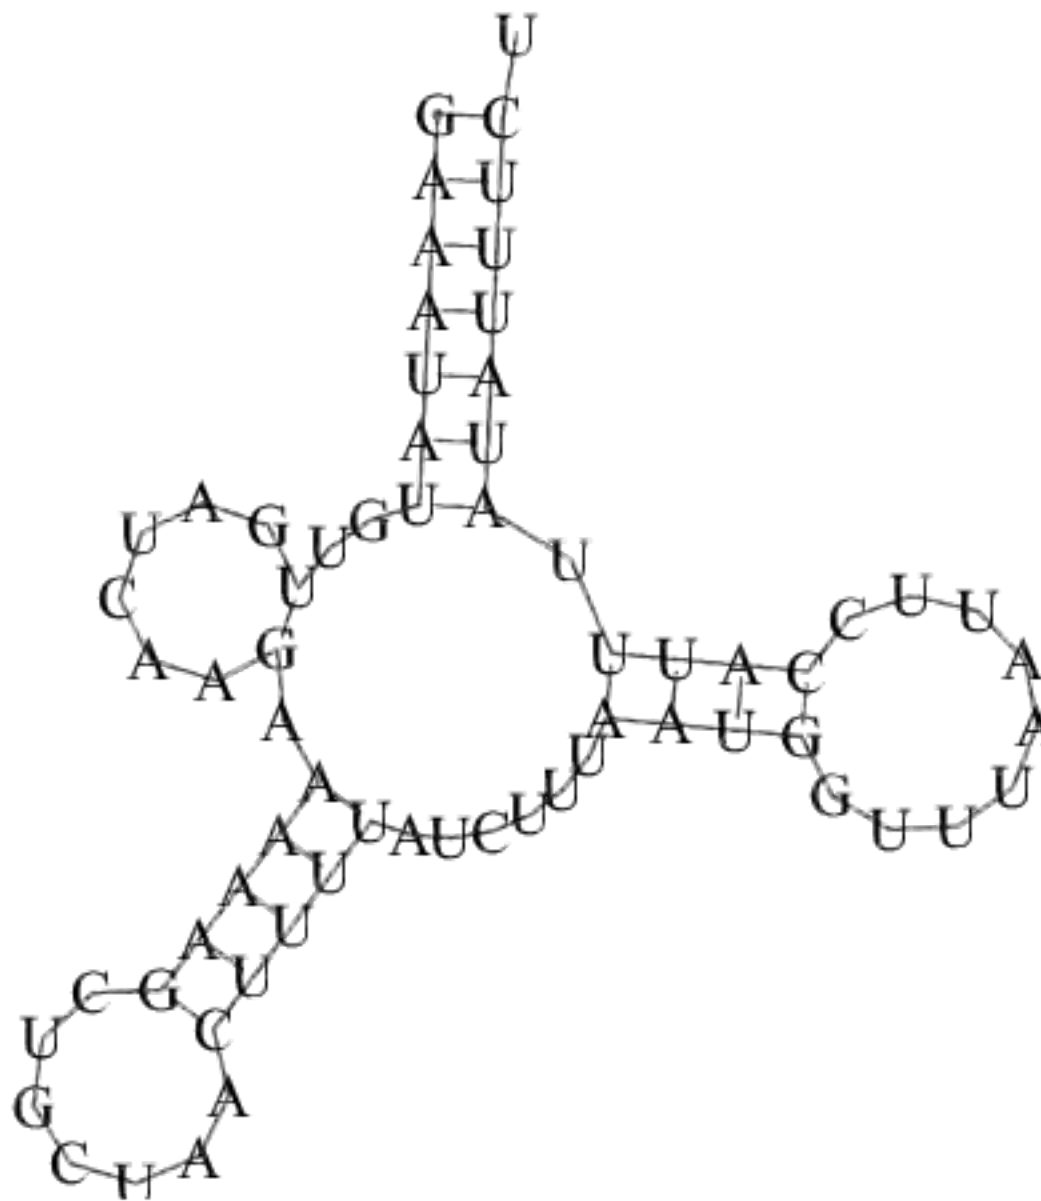

Serine(uga)

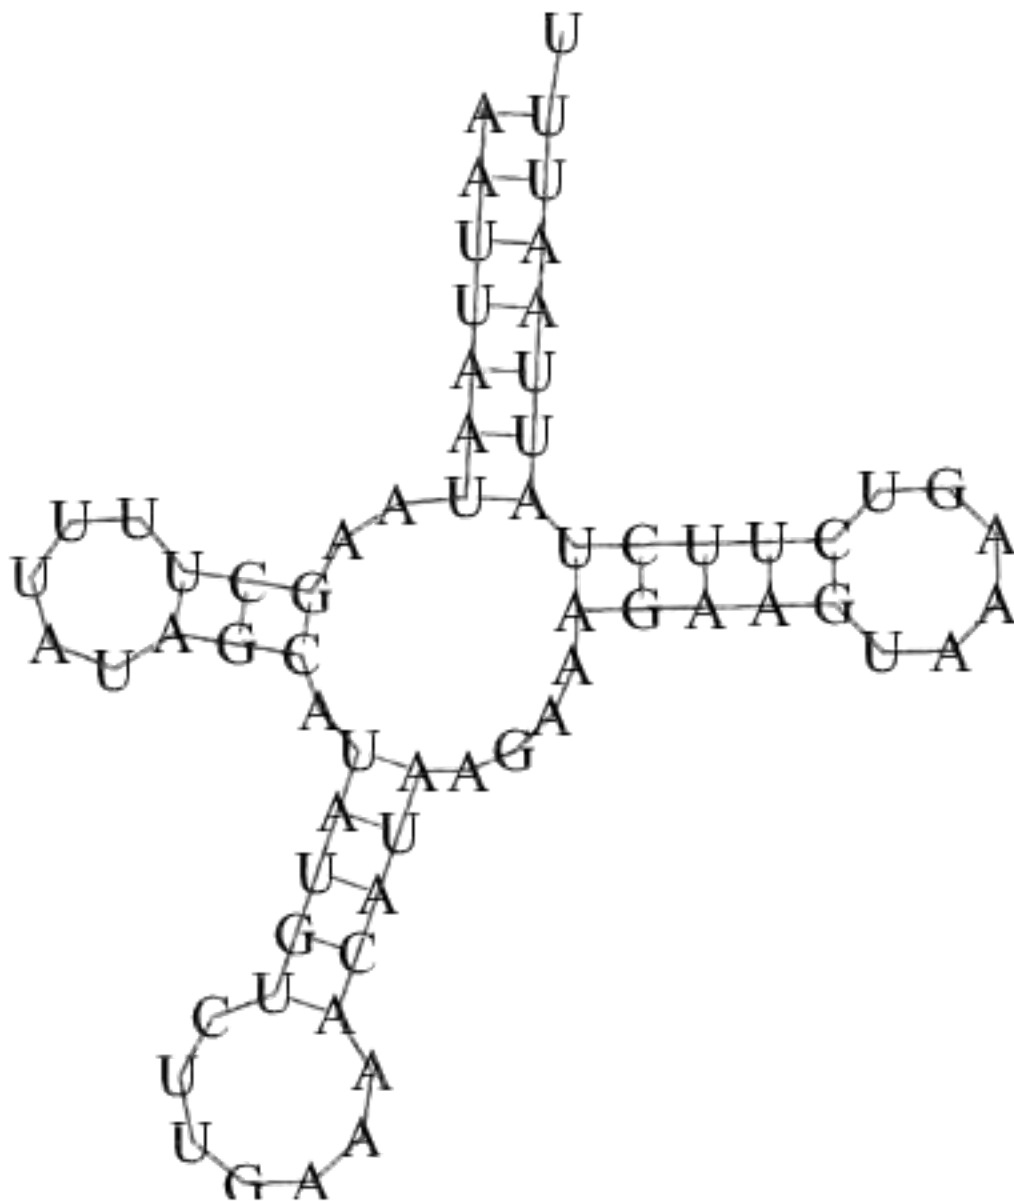

Threonine(ugu)

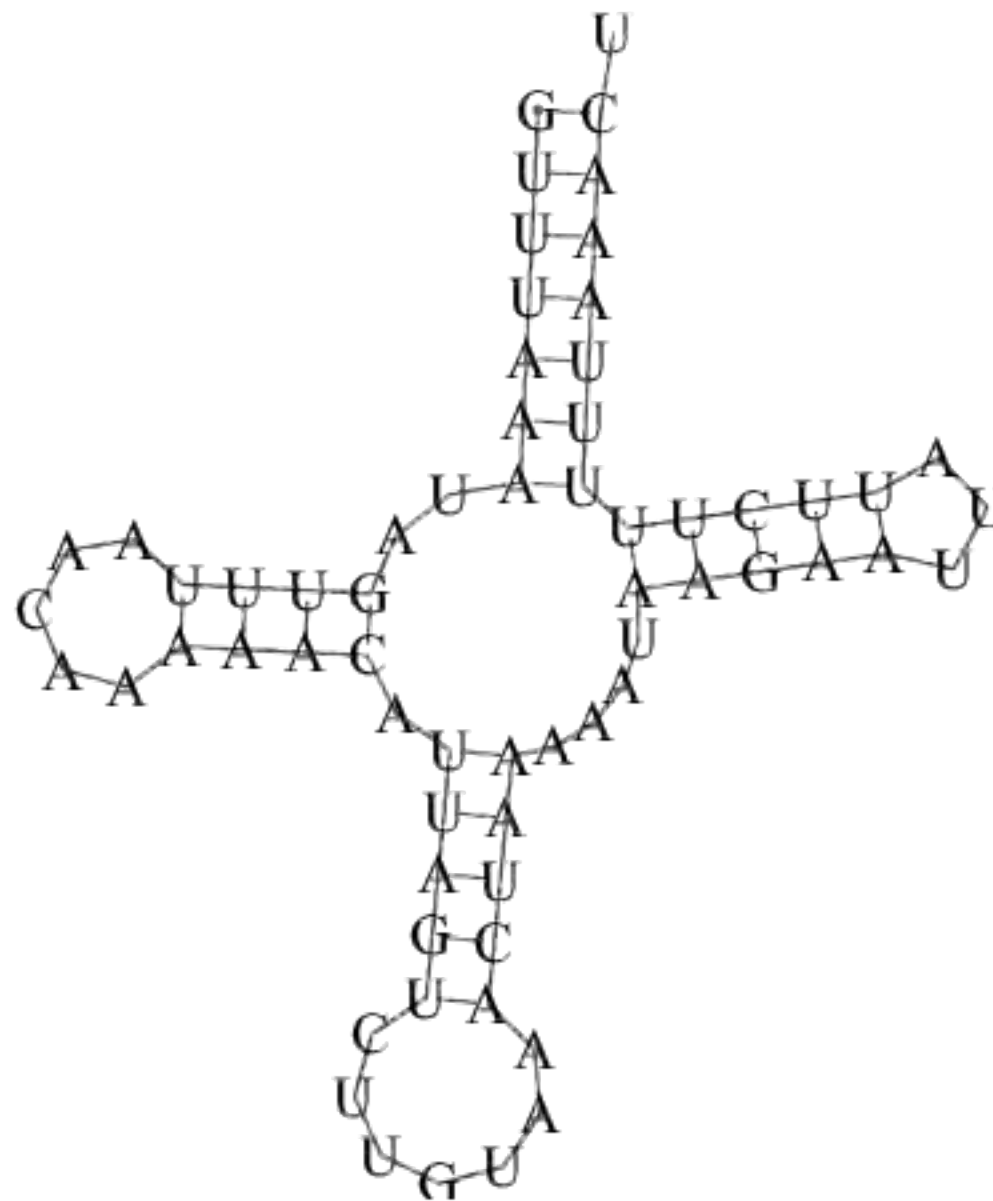

Tryptophan(uca)

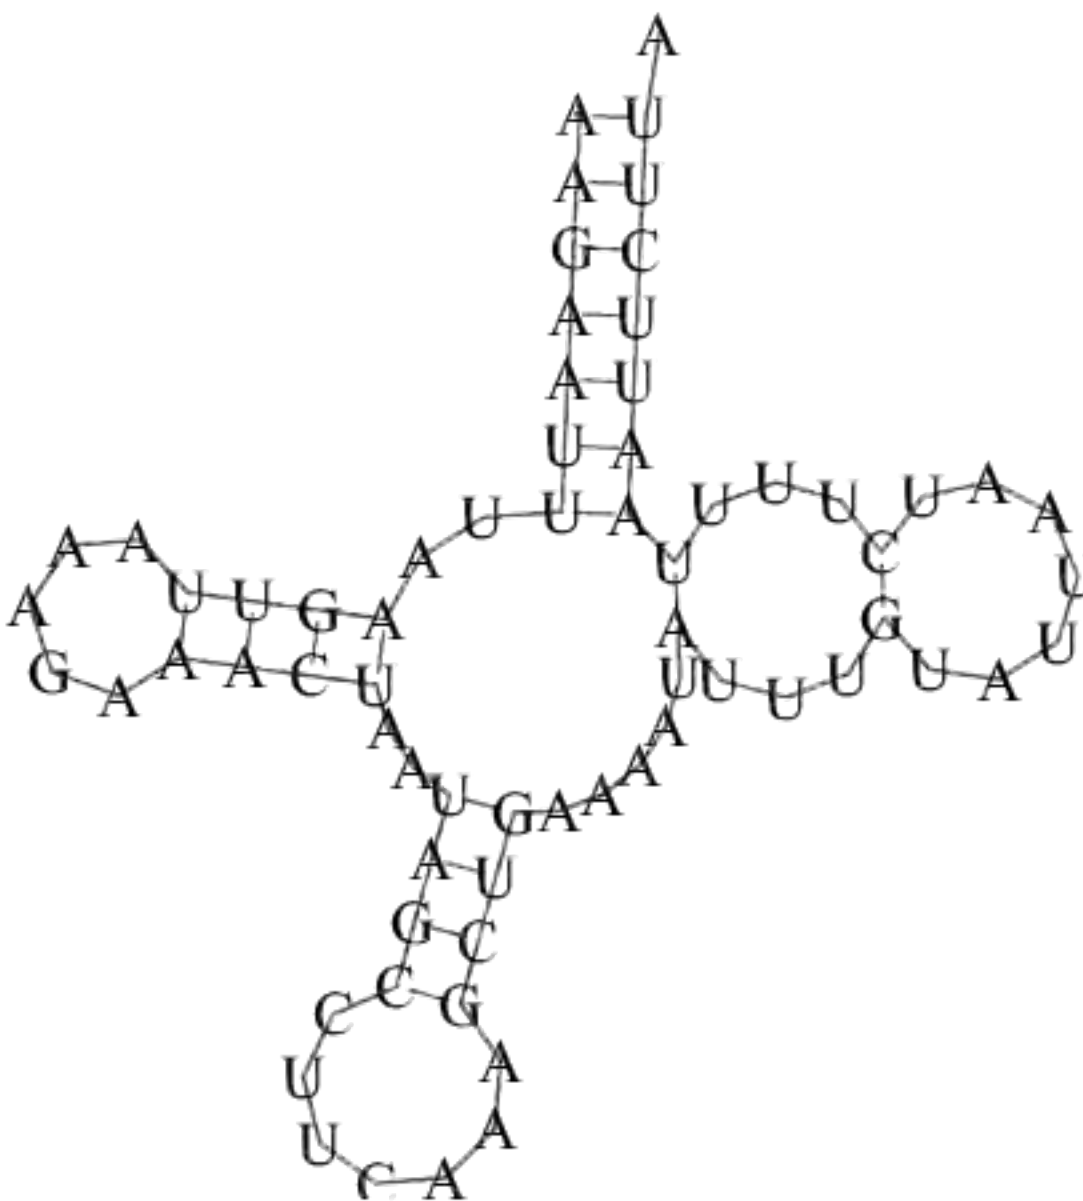

Tyrosine(gua)

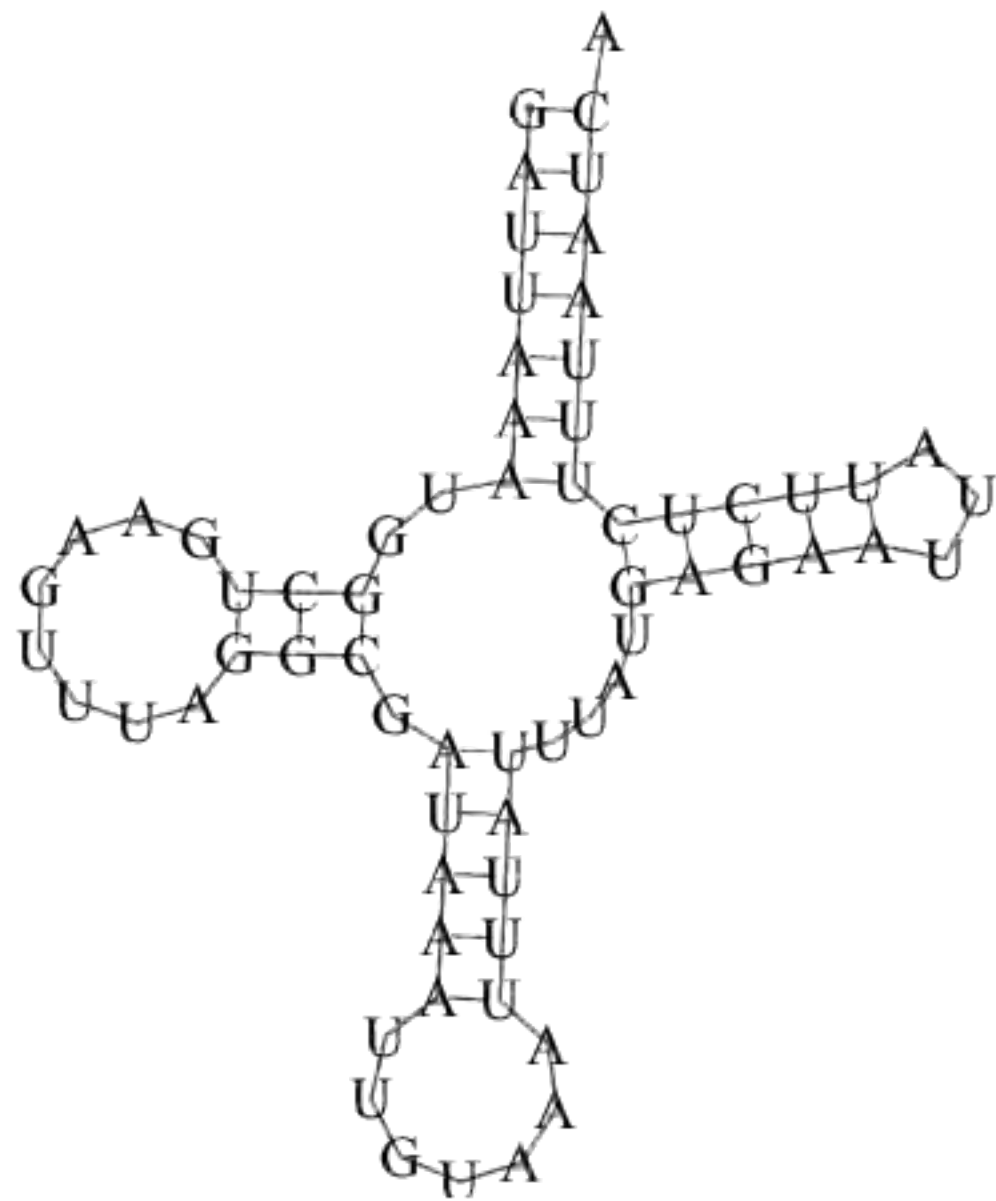

Valine(uac)

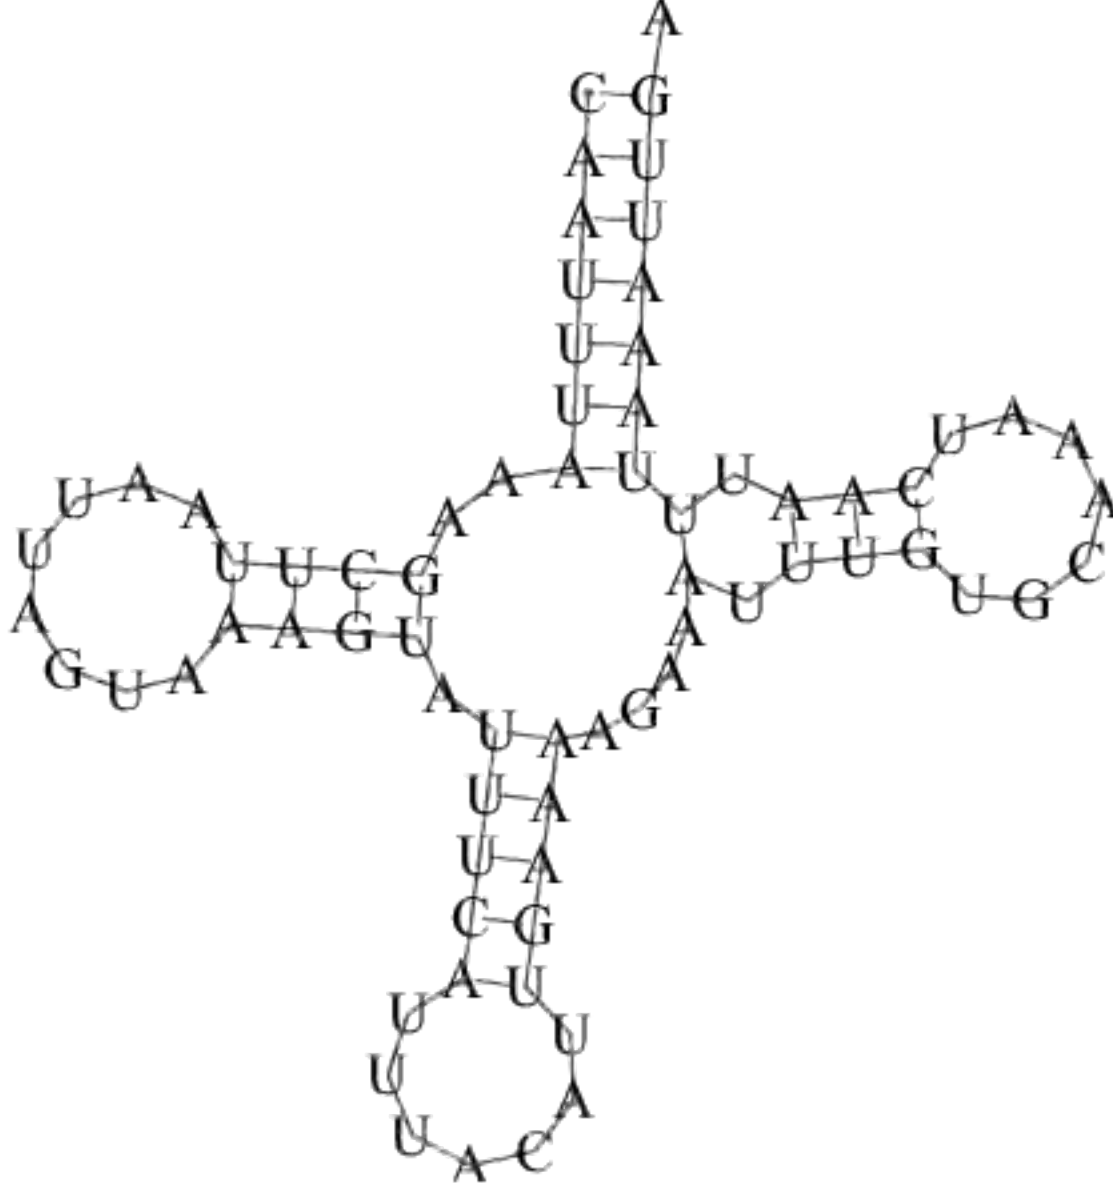



*An. crawfordi*

Alanine(ugc)

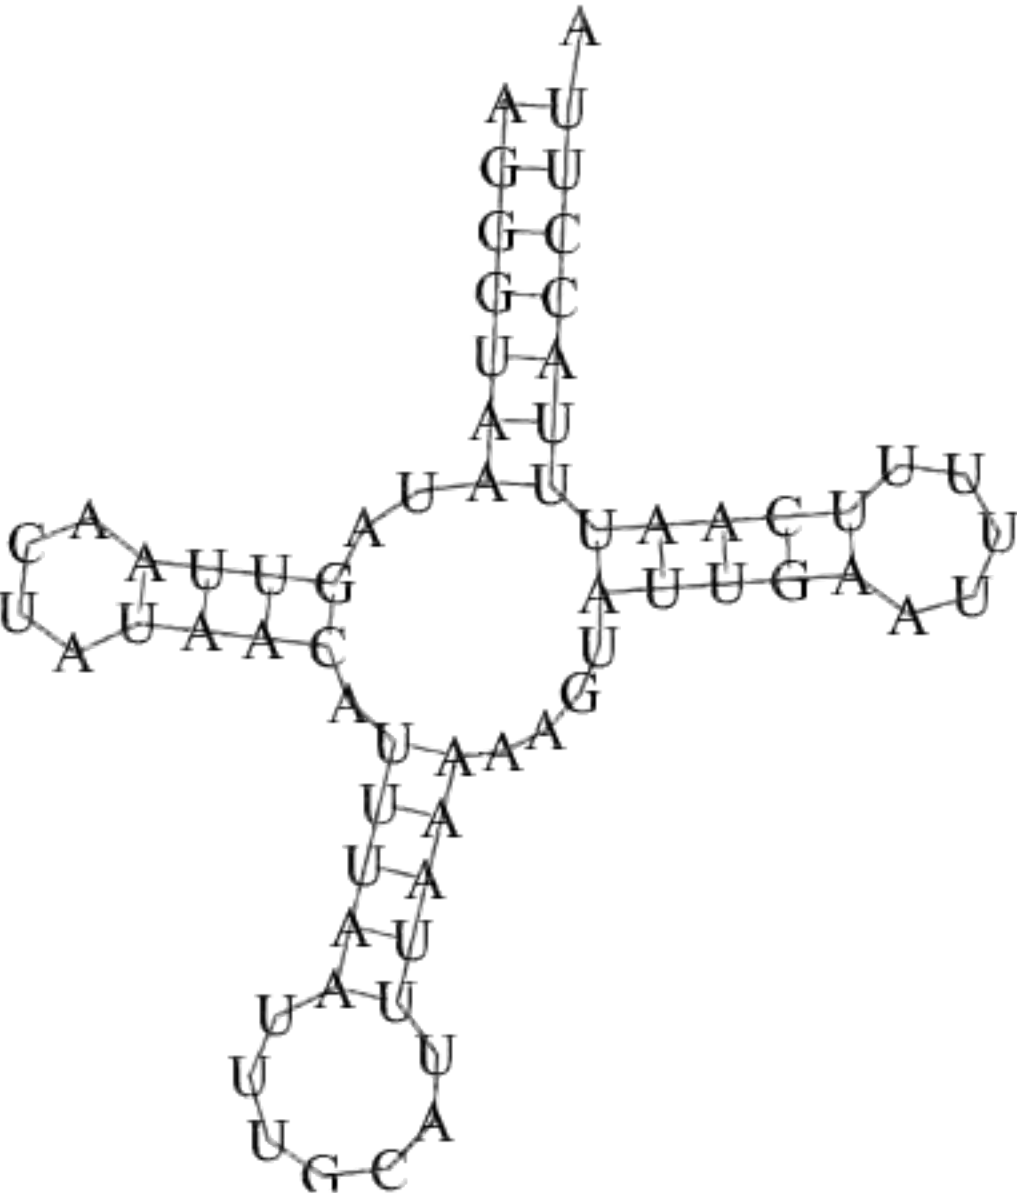

Arginine(ucg)

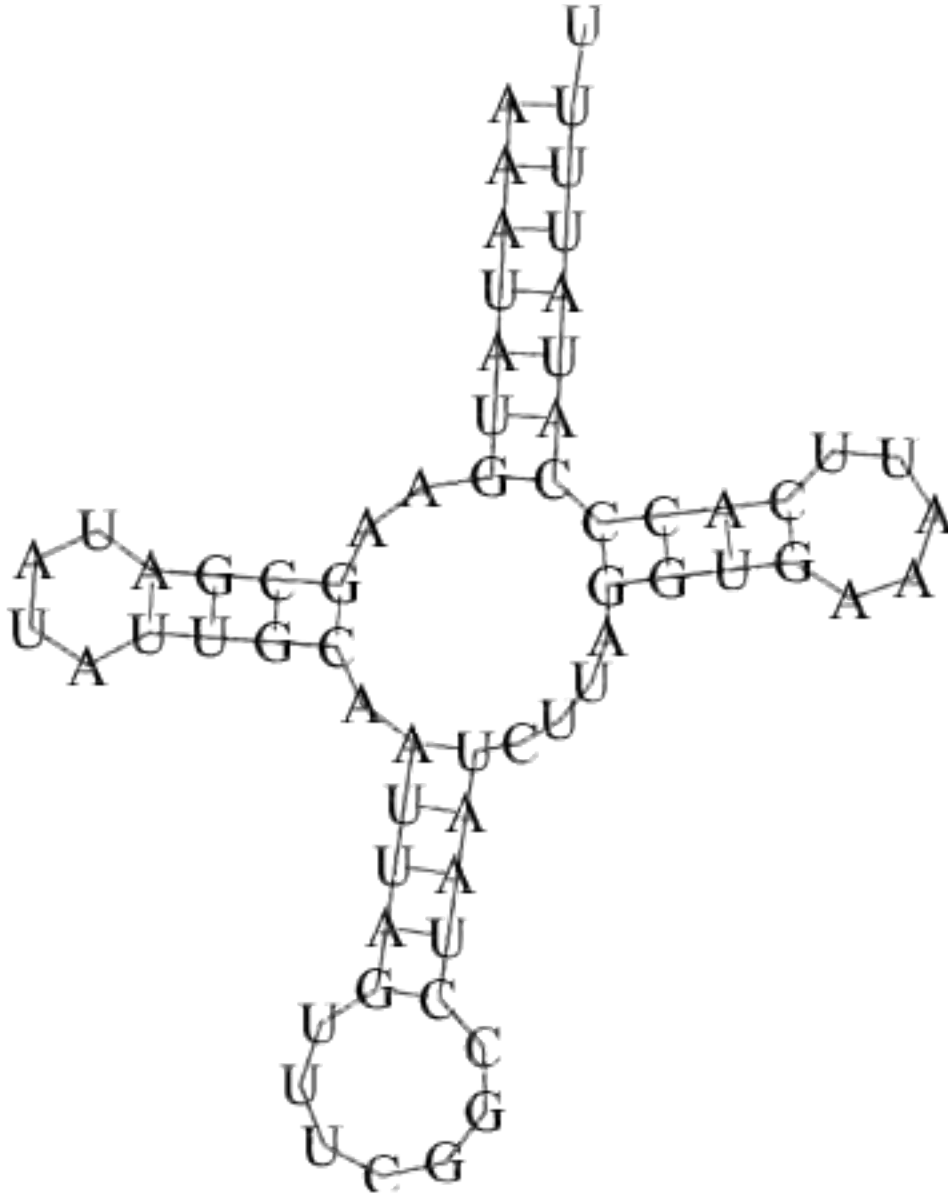

Asparagine(guu)

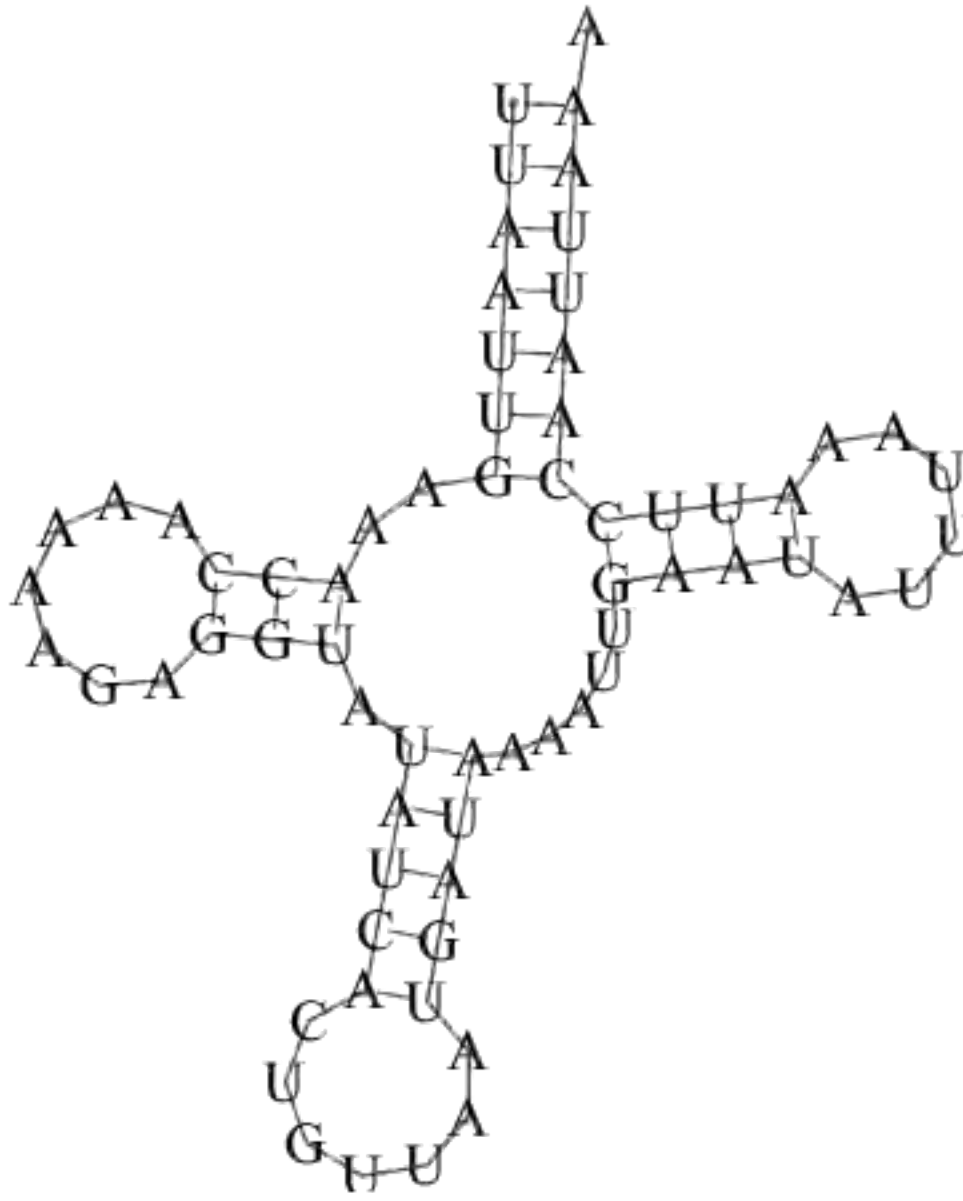

Aspartic acid(guc)

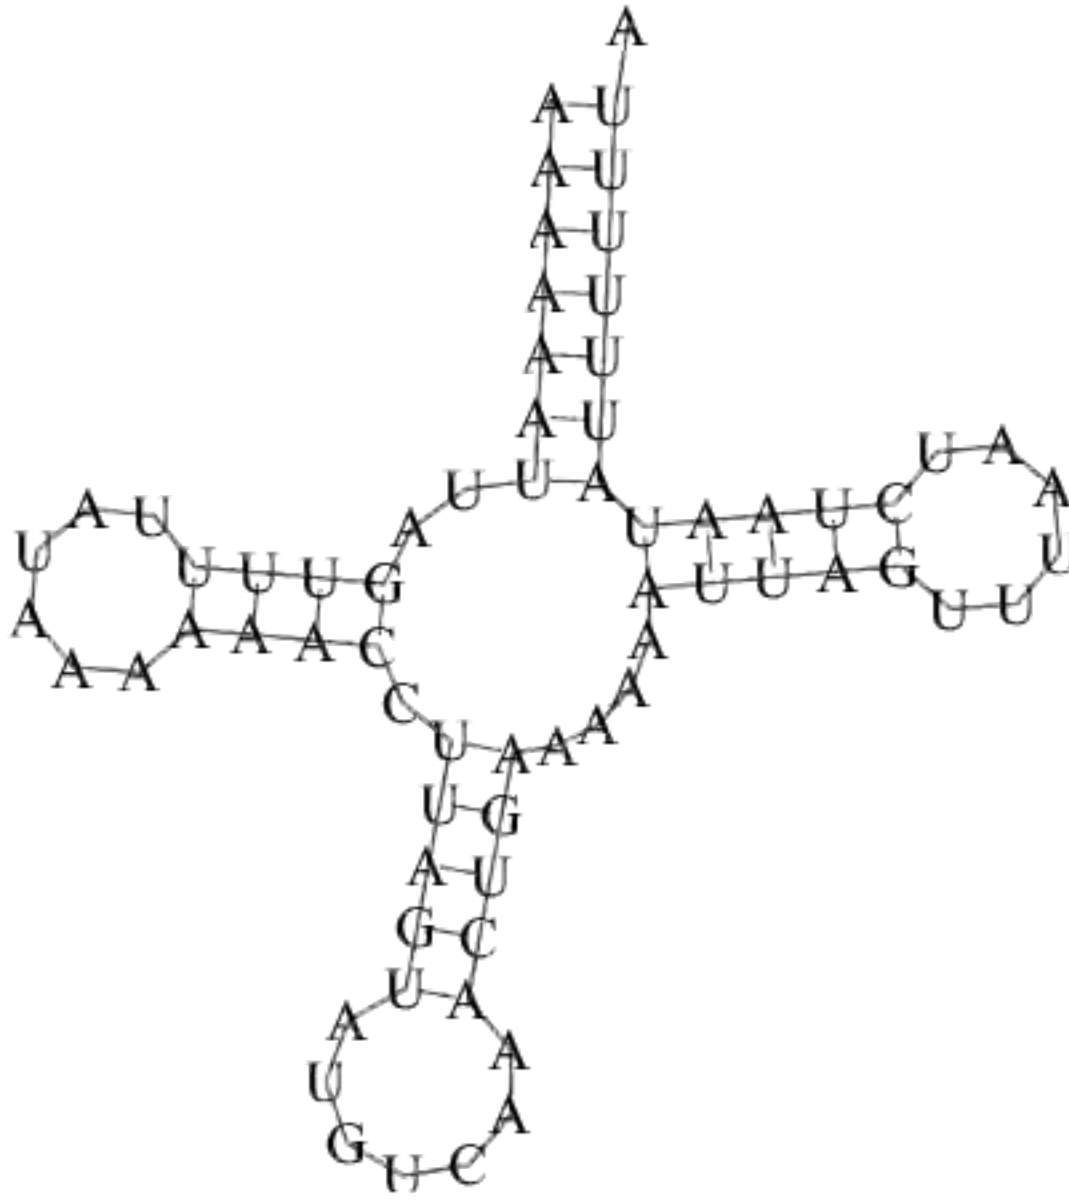

Cysteine(gca)

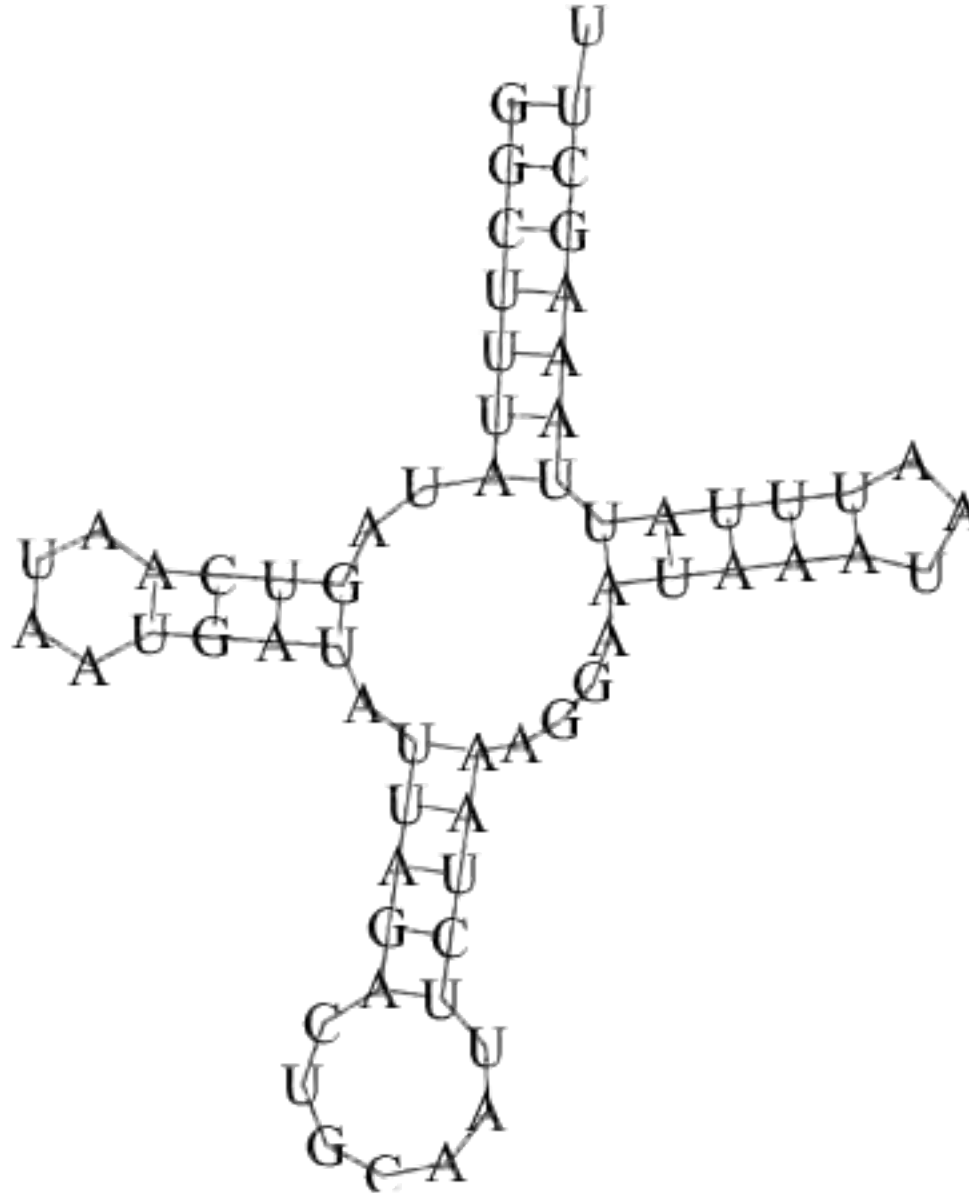

Glutamine(uuc)

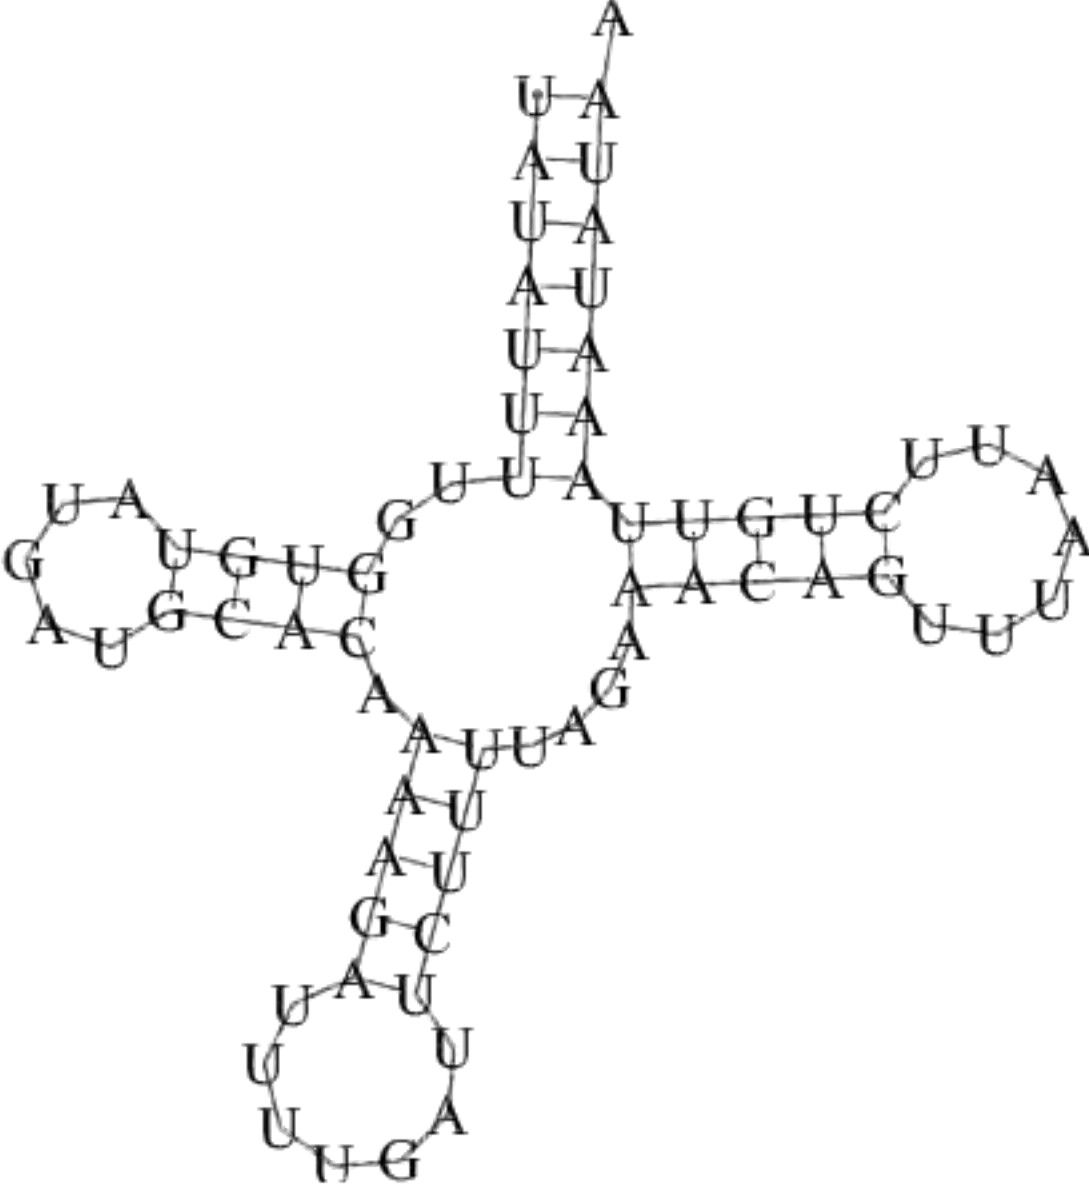

Glutamic acid(uug)

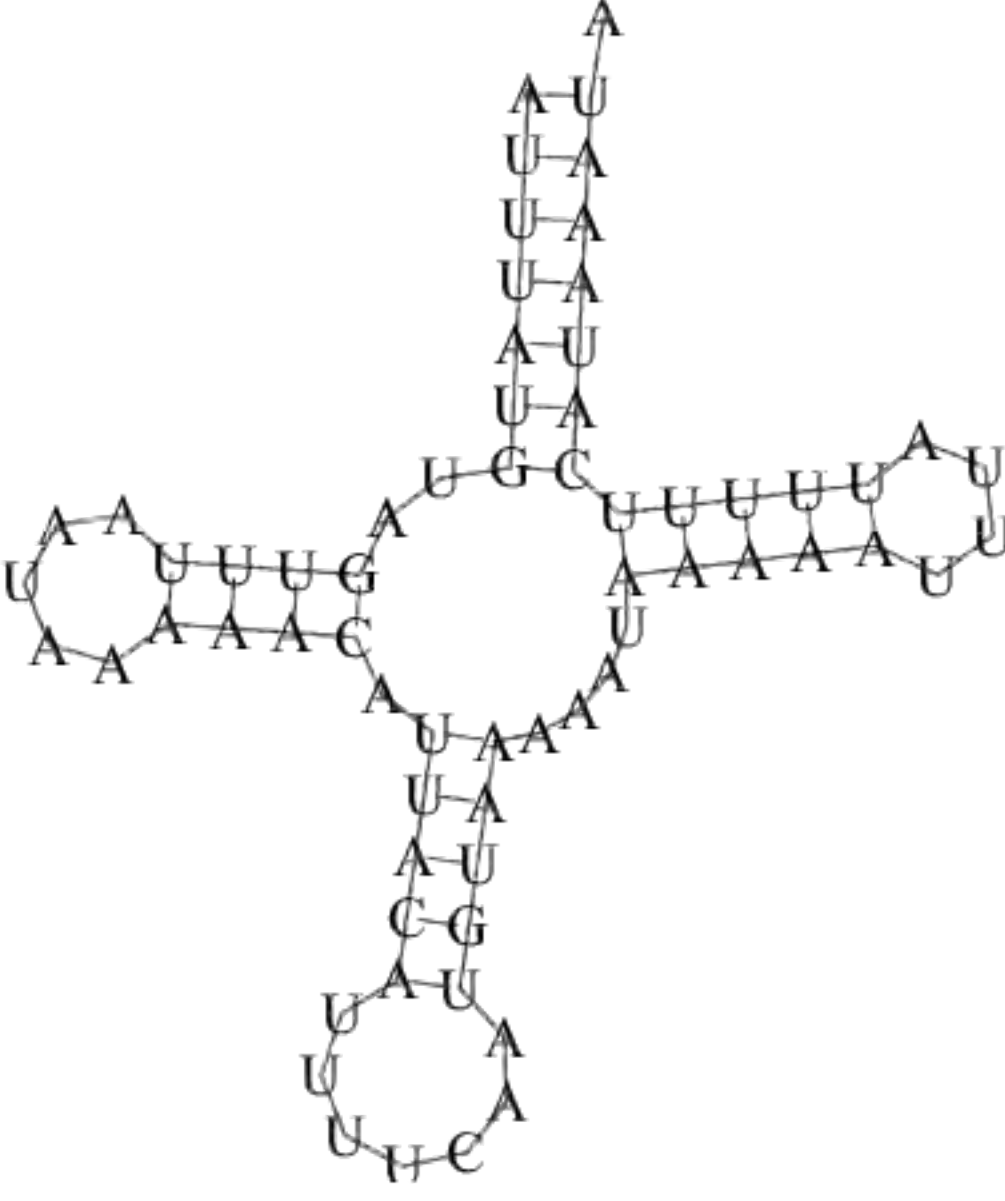

Glycine(ucc)

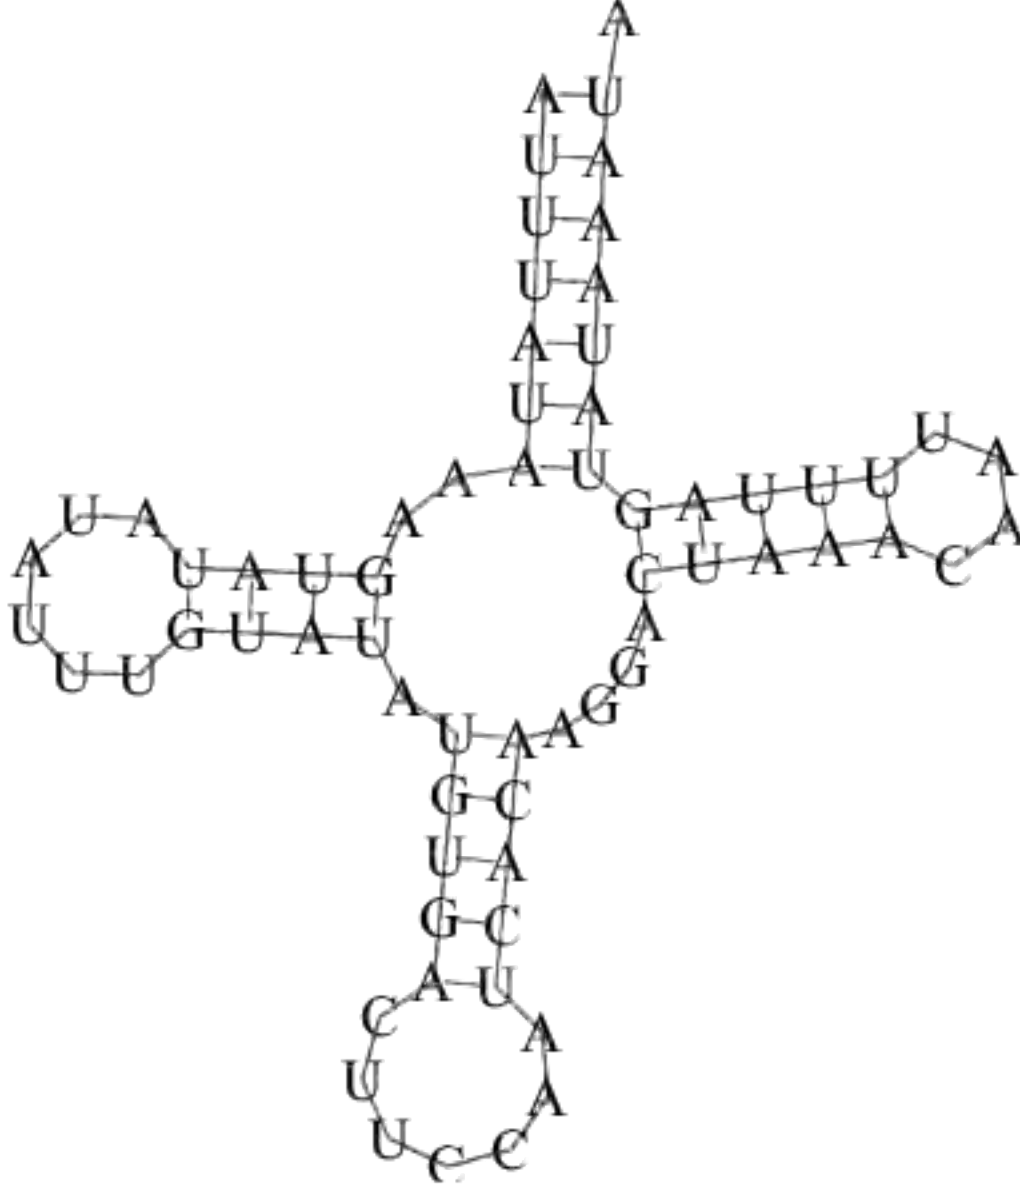

Histidine(gug)

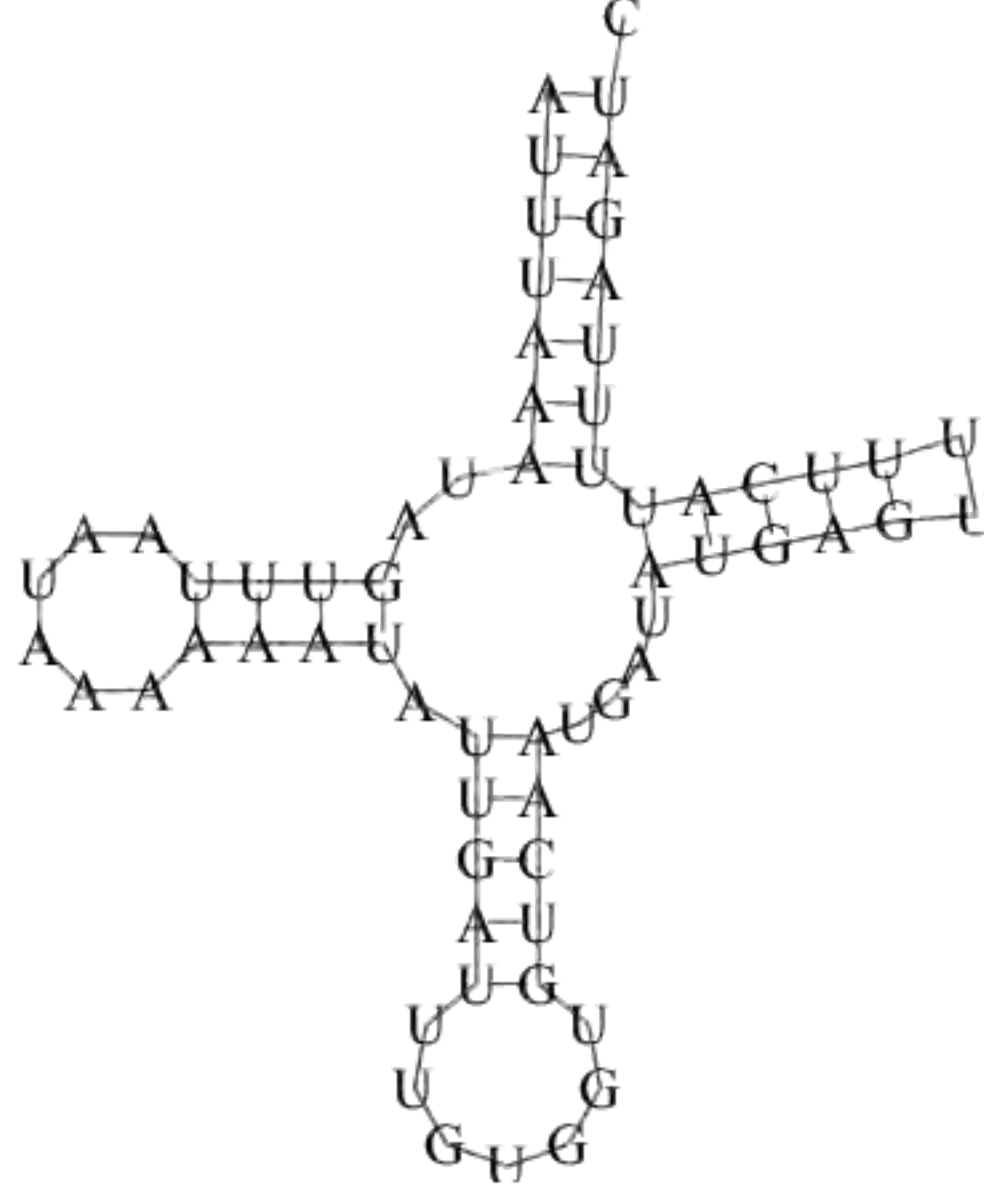

Isoleucine(gau)

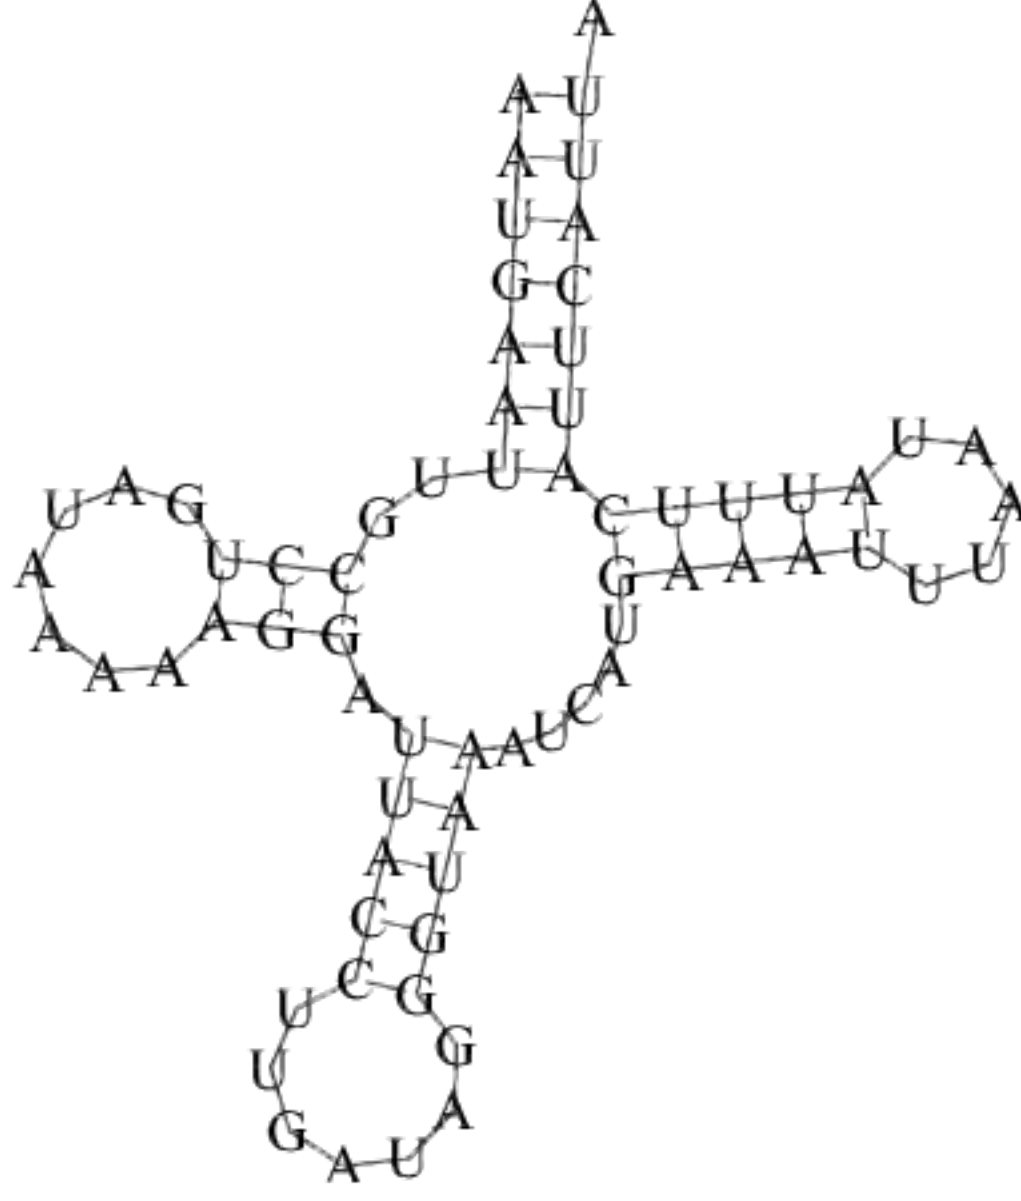

Leucine(uag)

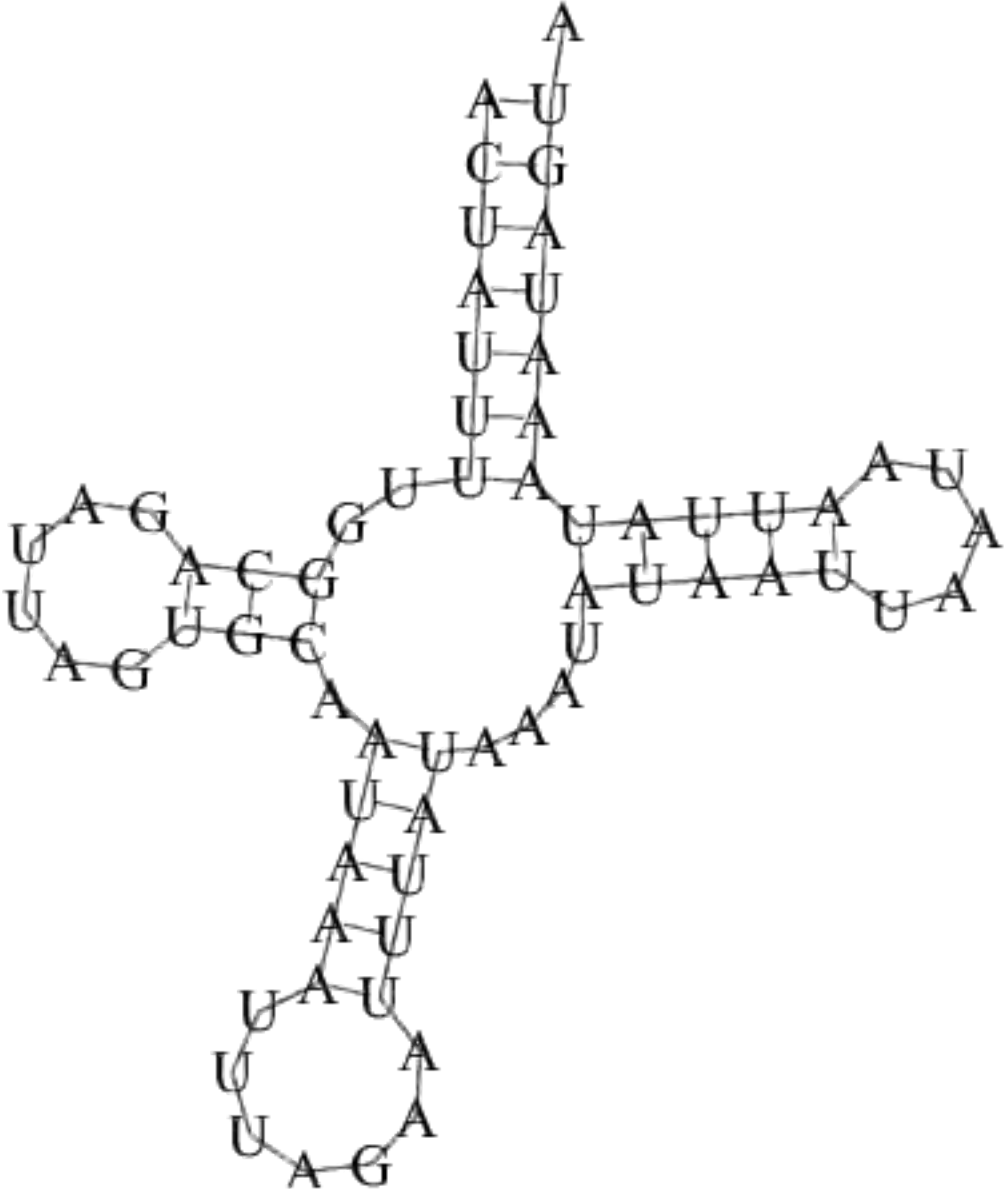

Leucine(uaa)

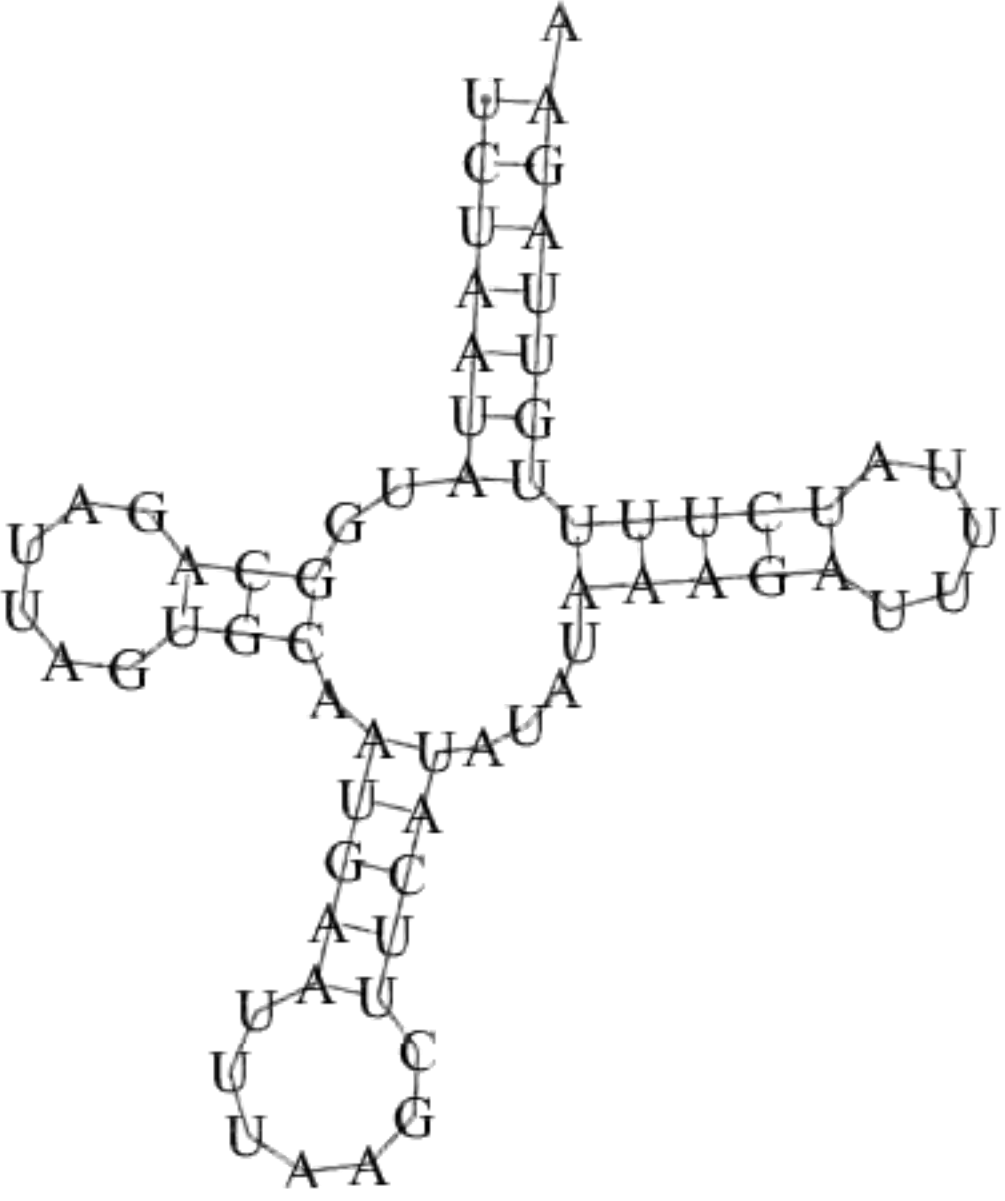

Lysine(cuu)

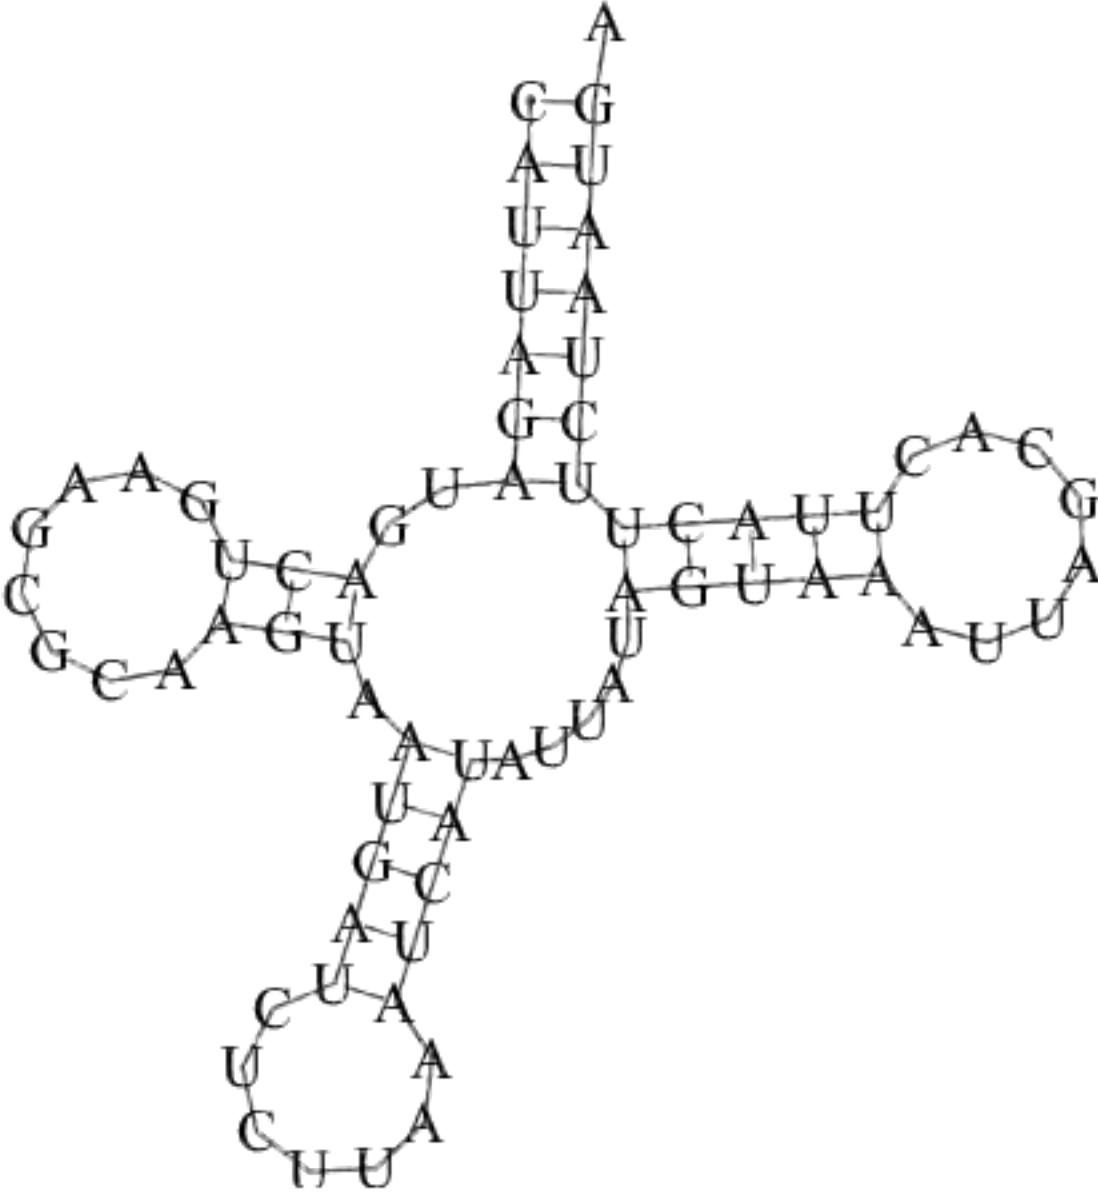

Methionine(cau)

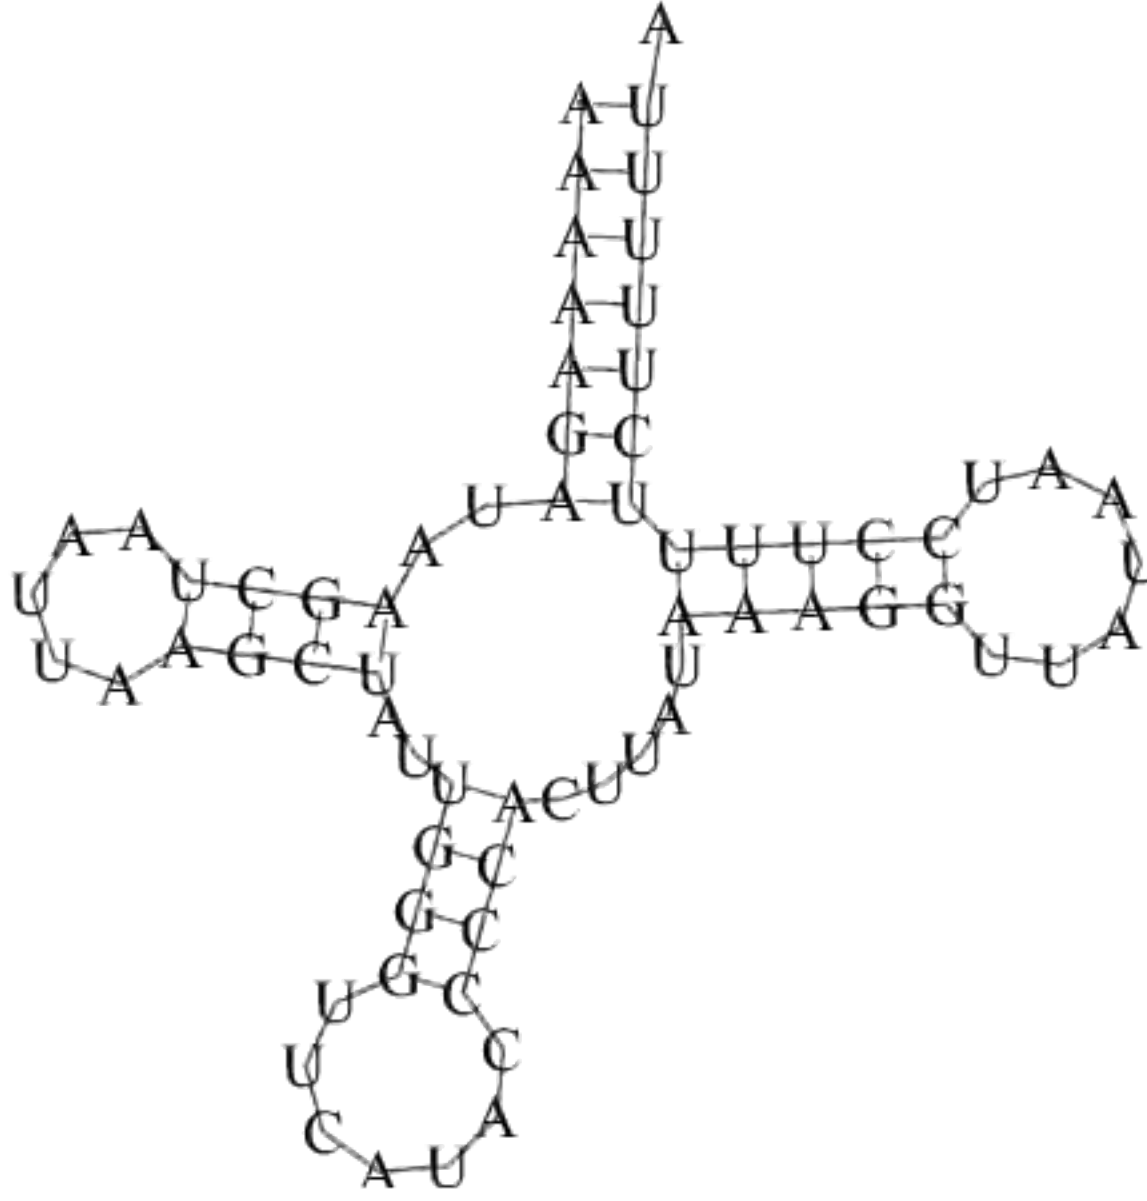

Phenylalanine(gaa)

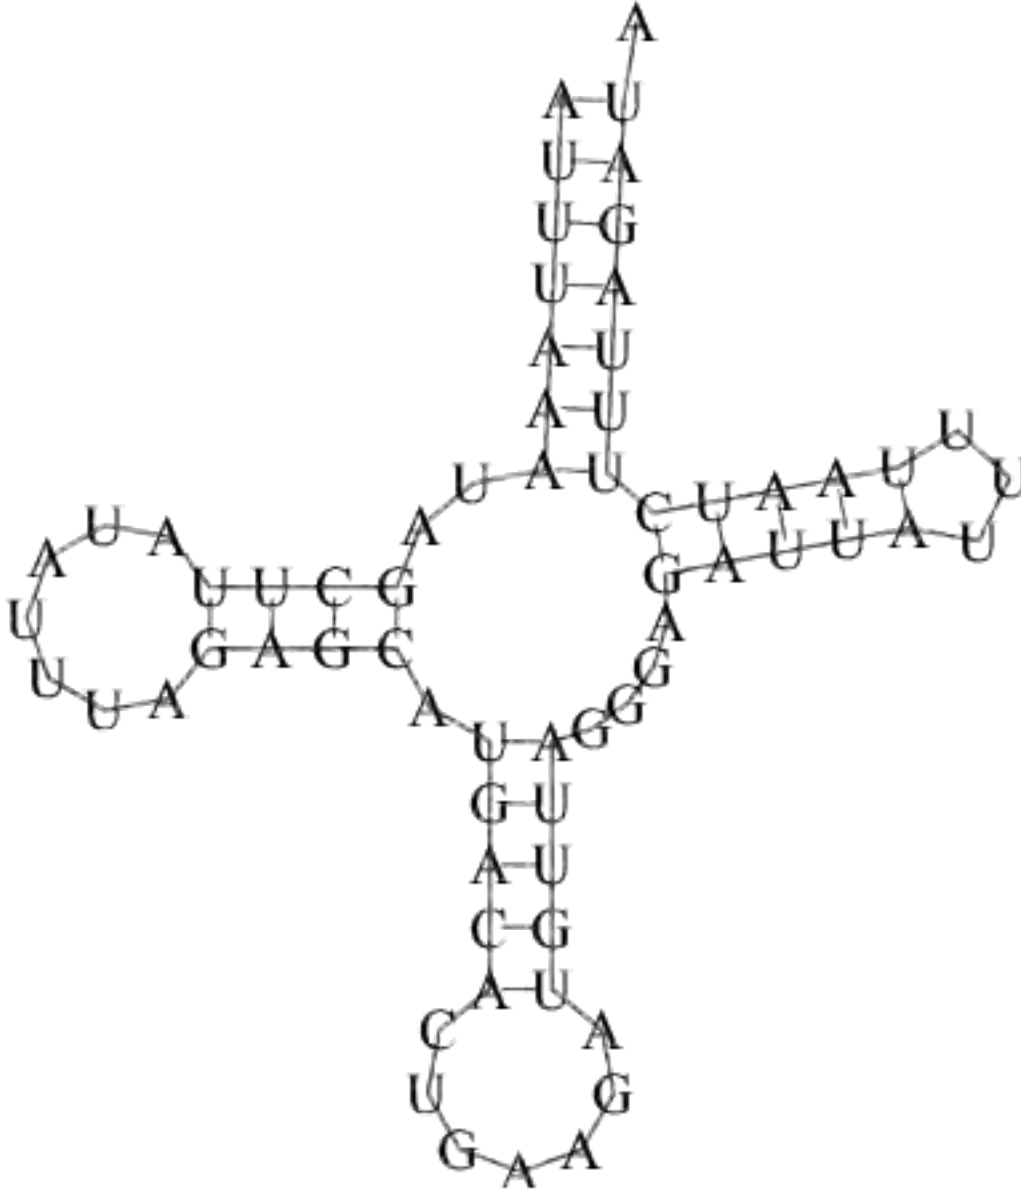

Proline(ugg)

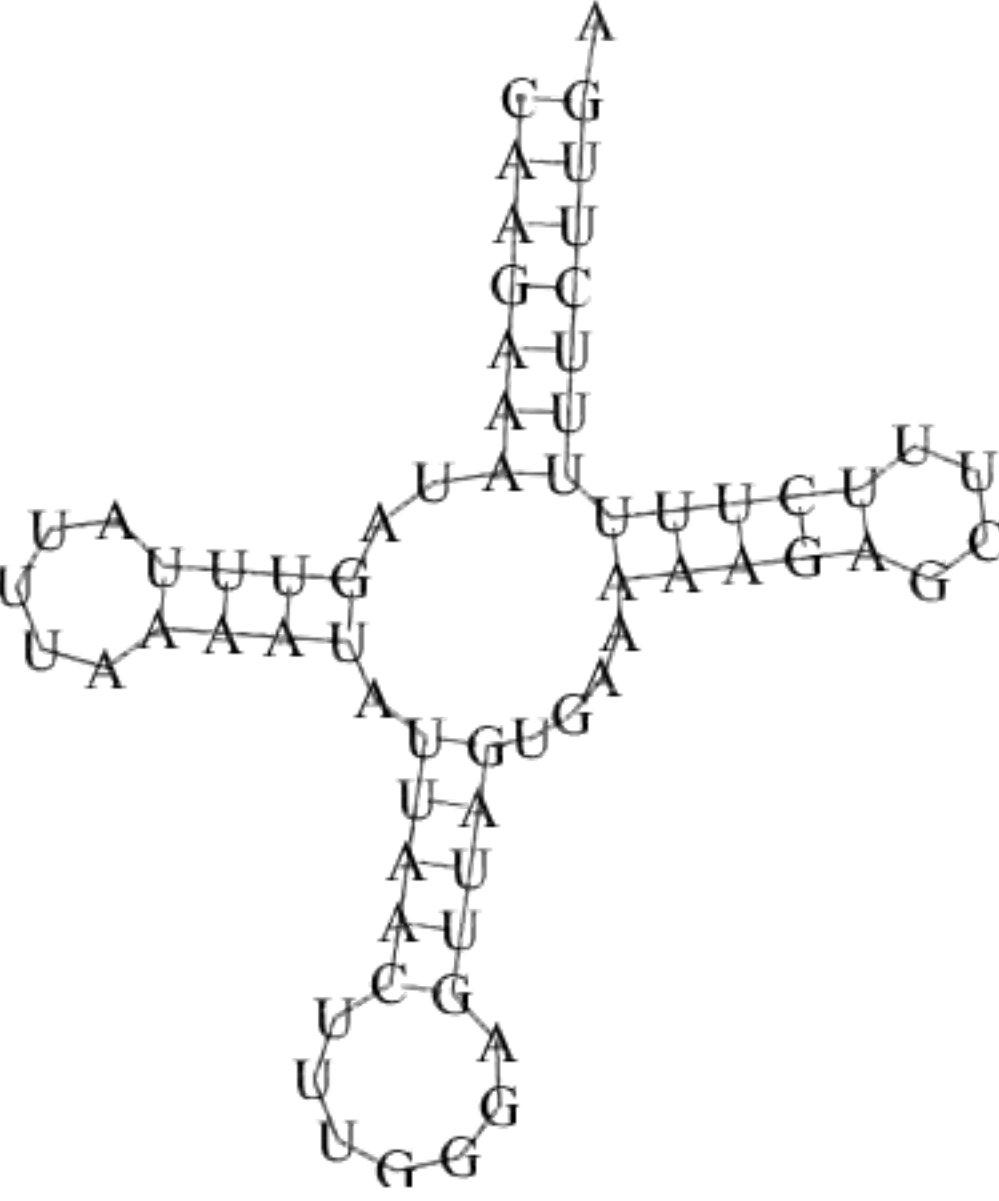

Serine(gcu)

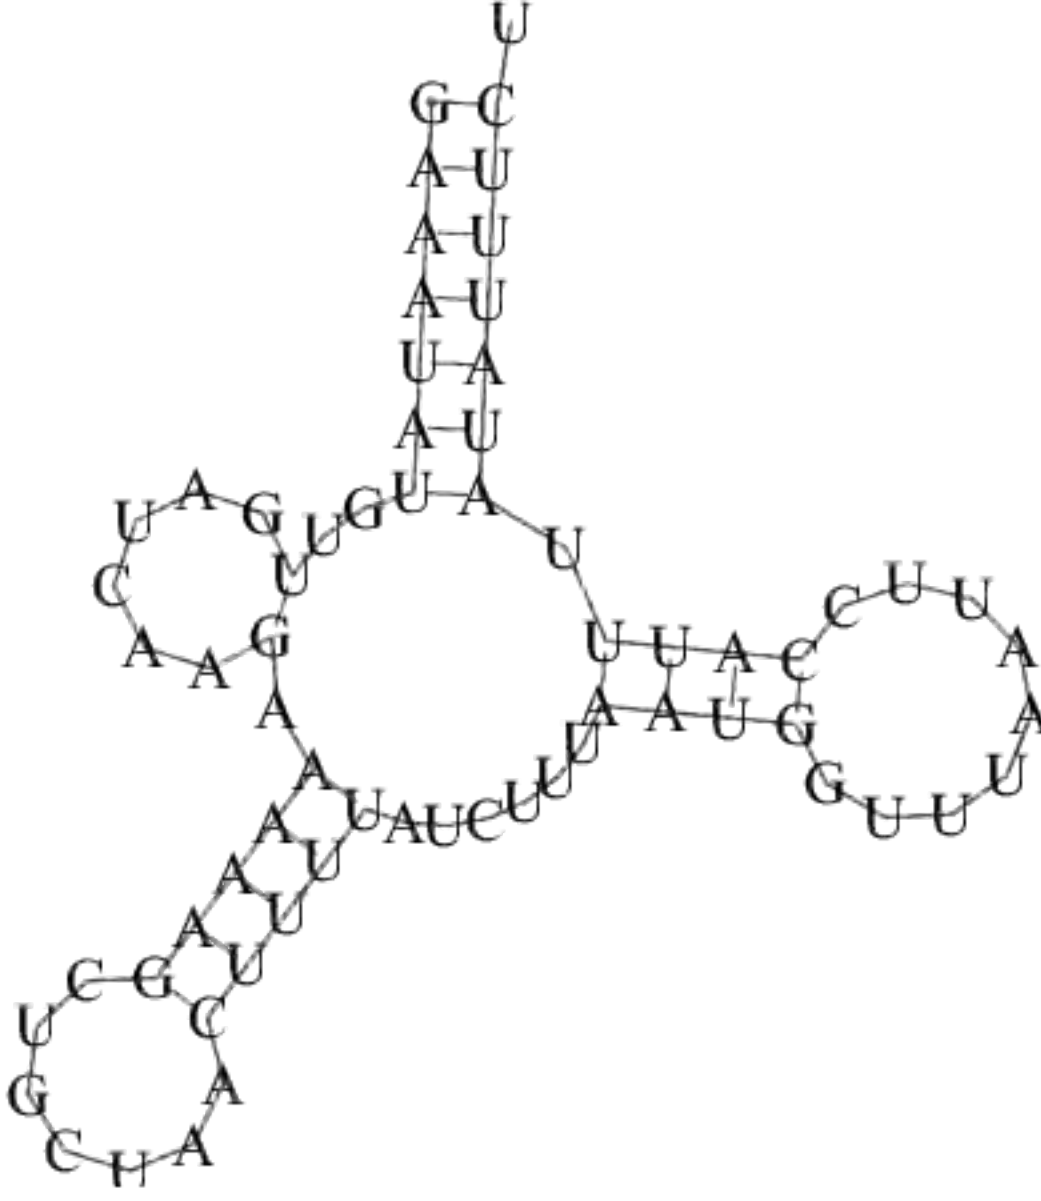

Serine(uga)

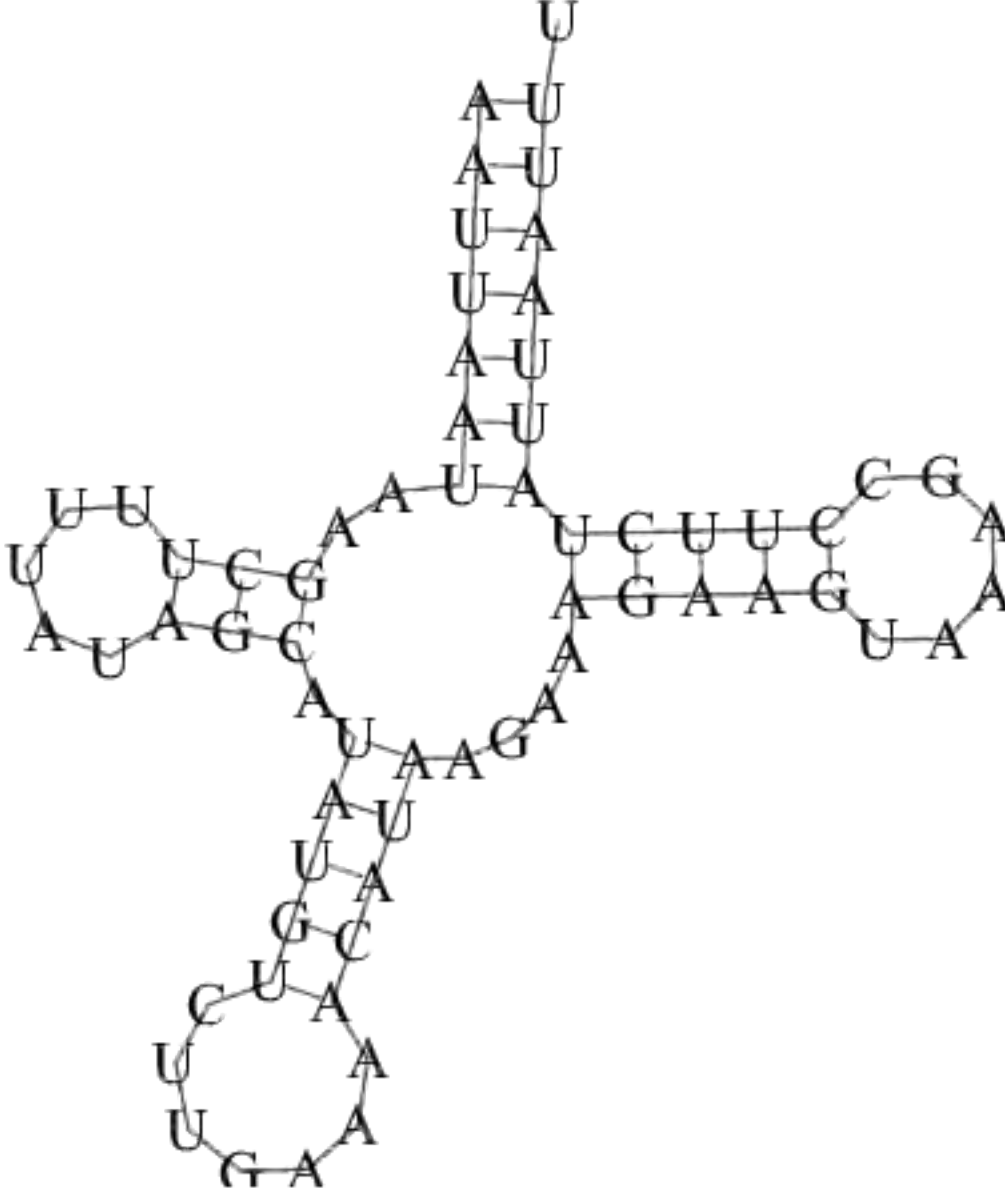

Threonine(ugu)

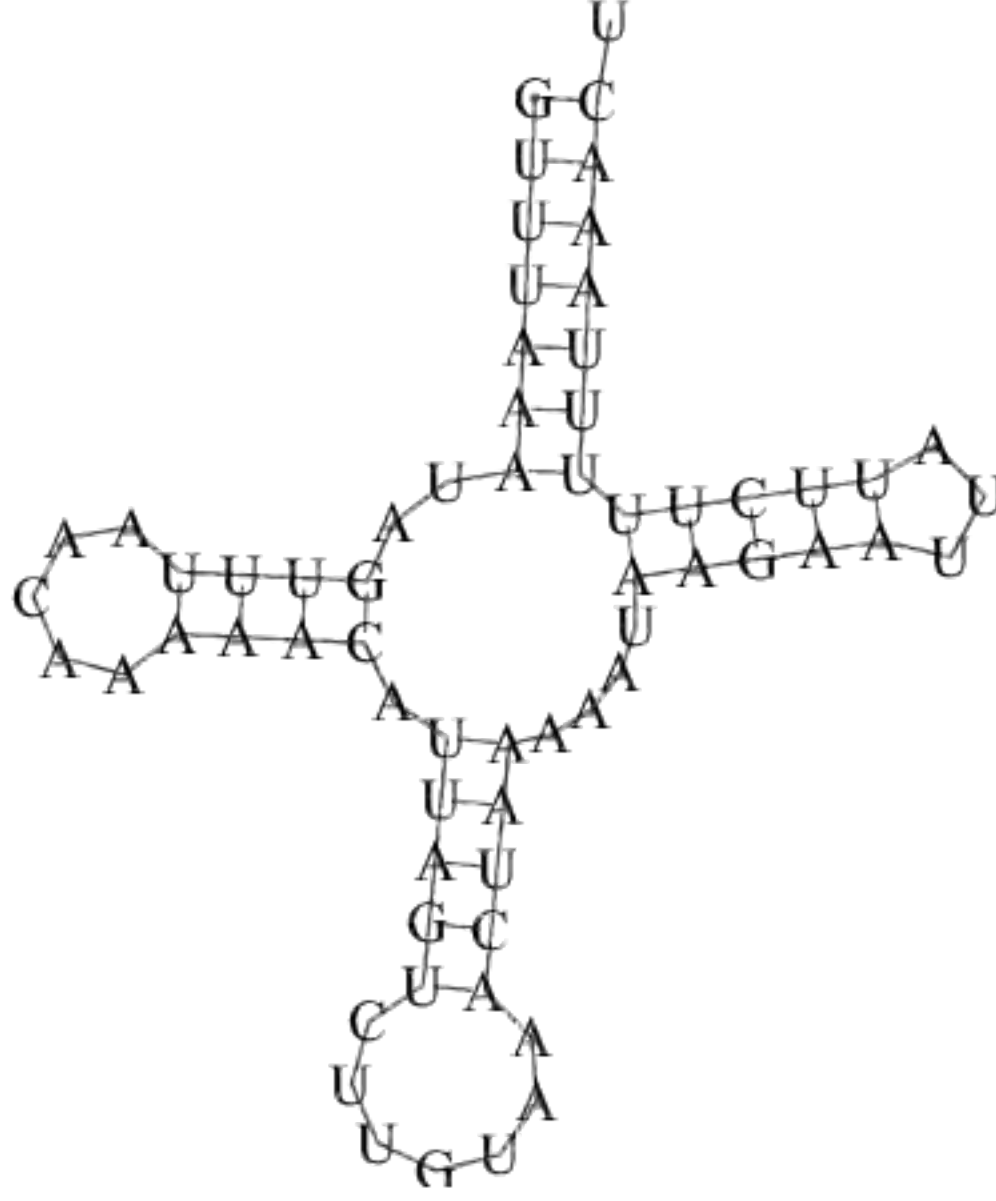

Tryptophan(uca)

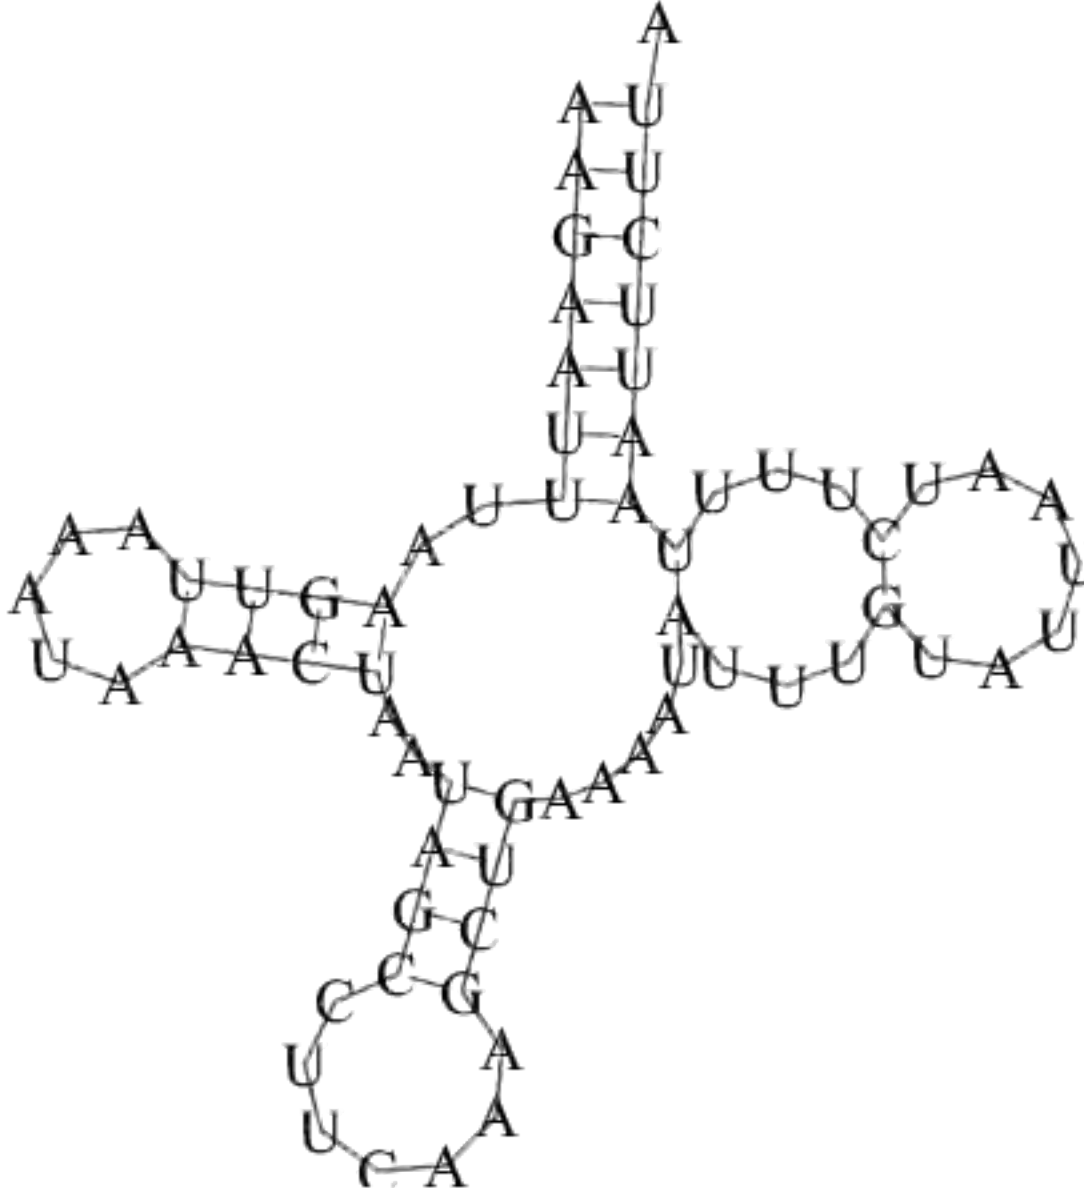

Tyrosine(gua)

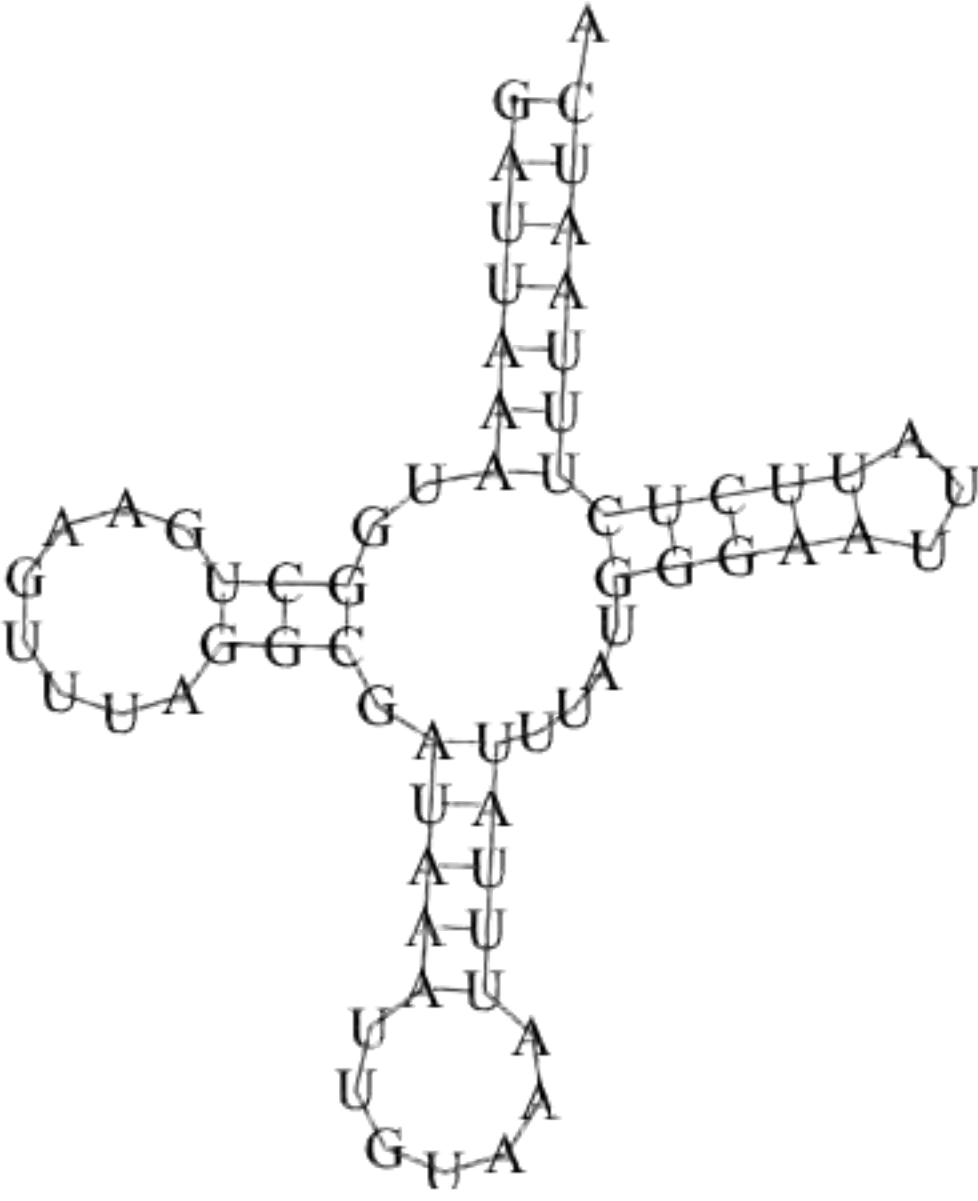

Valine(uac)

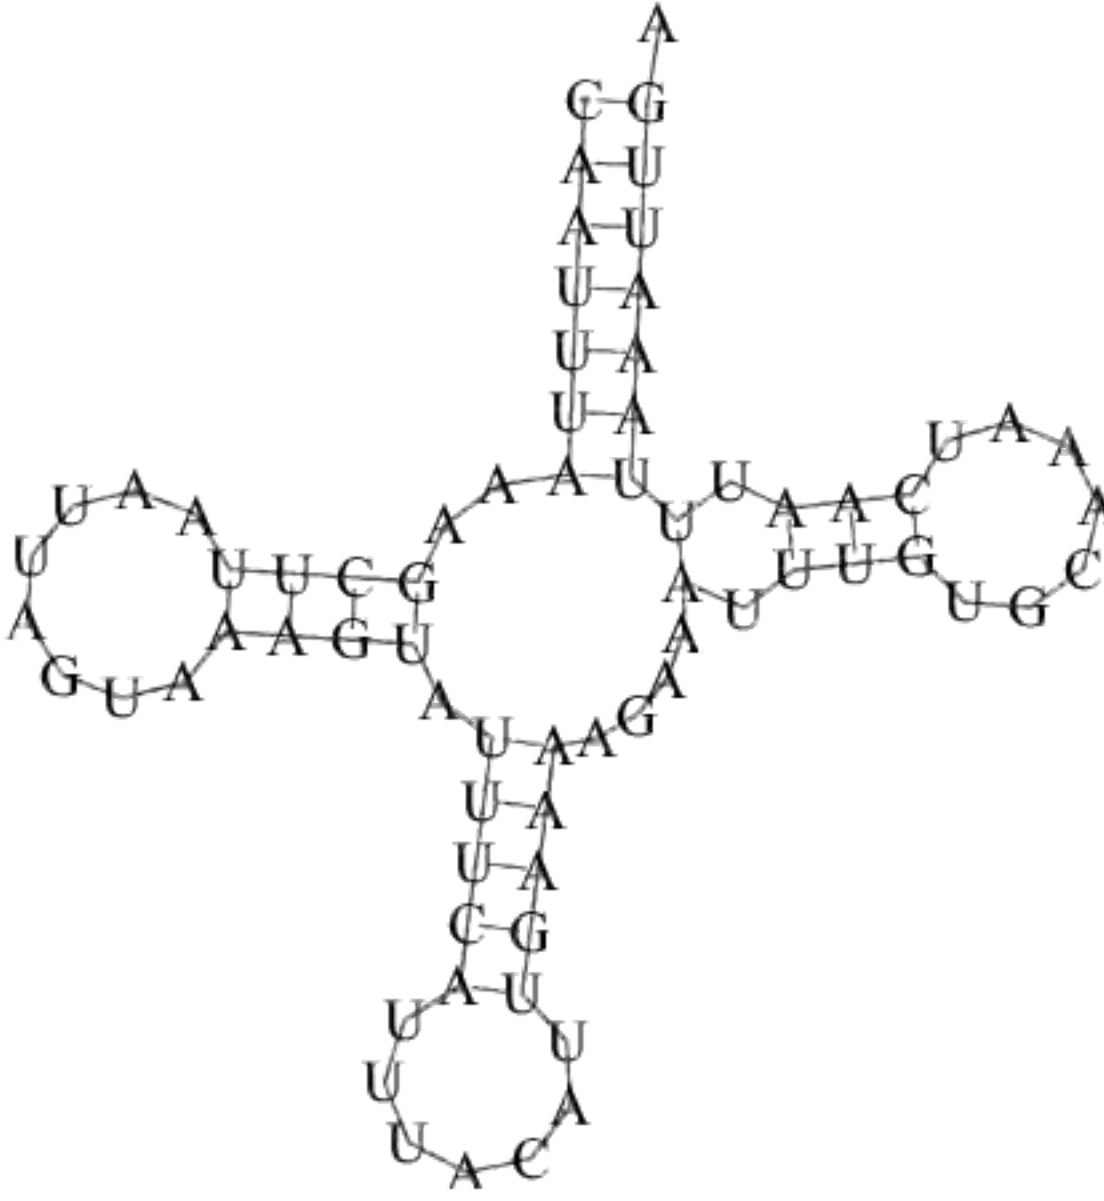



An. junlianensis

Alanine(ugc)

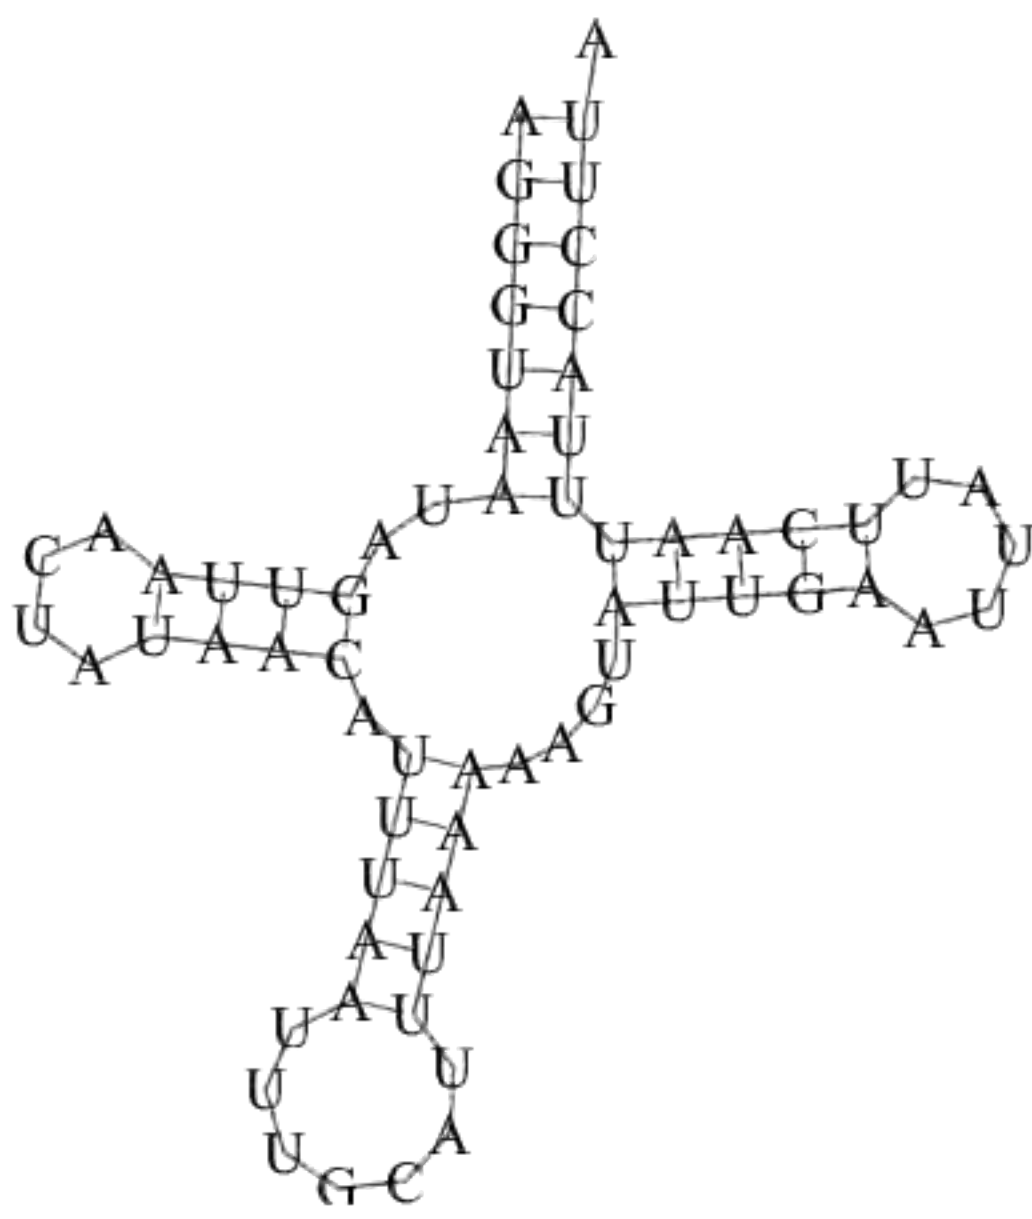

Arginine(ucg)

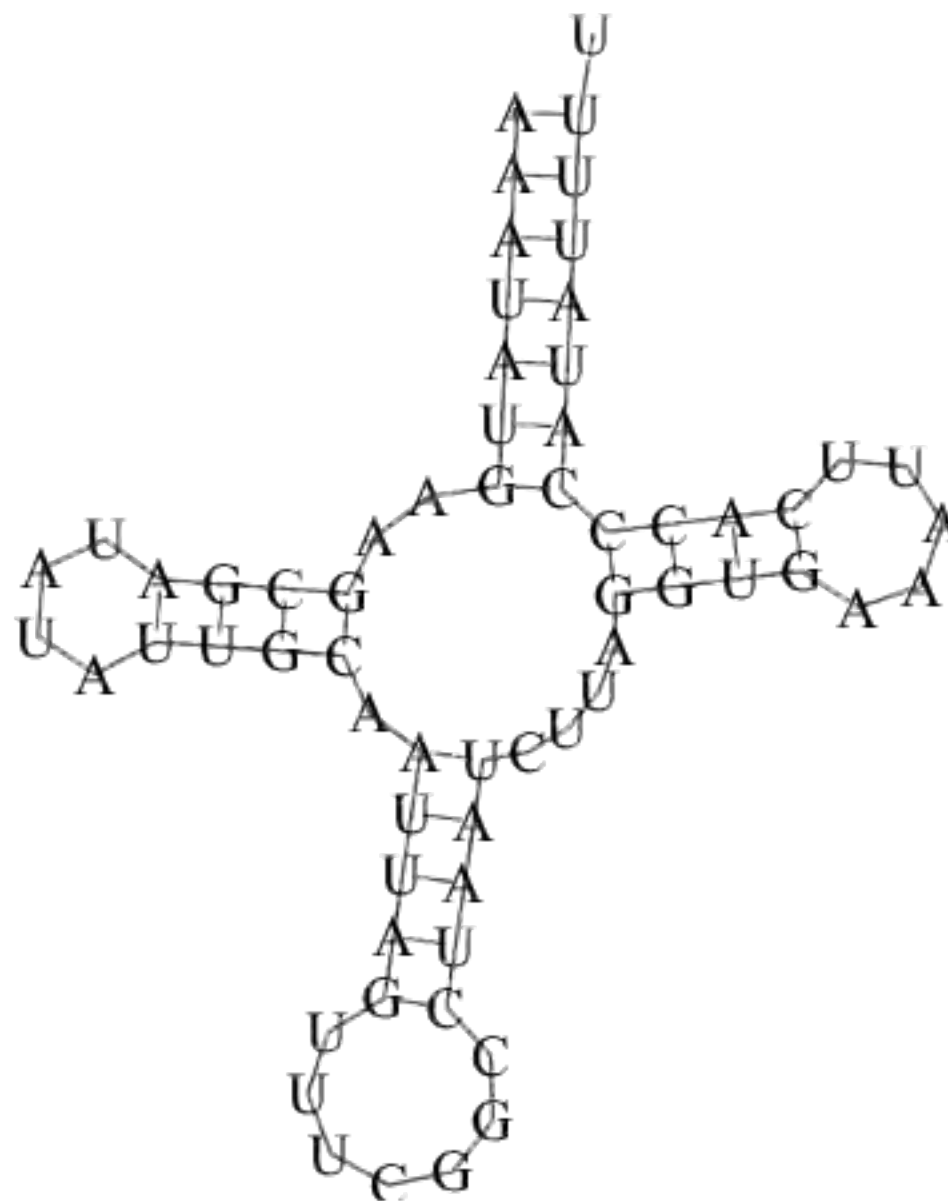

Asparagine(guu)

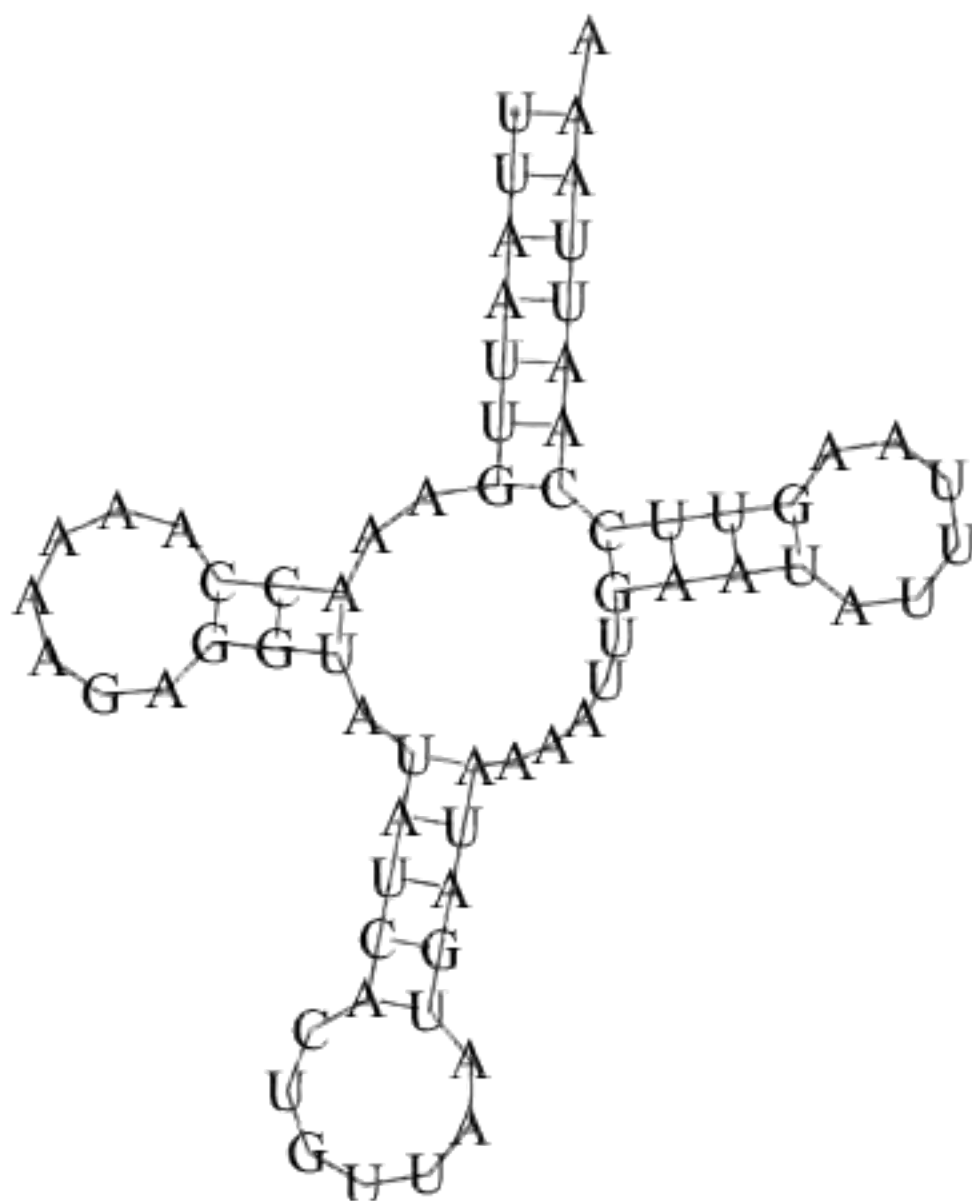

Aspartic acid(guc)

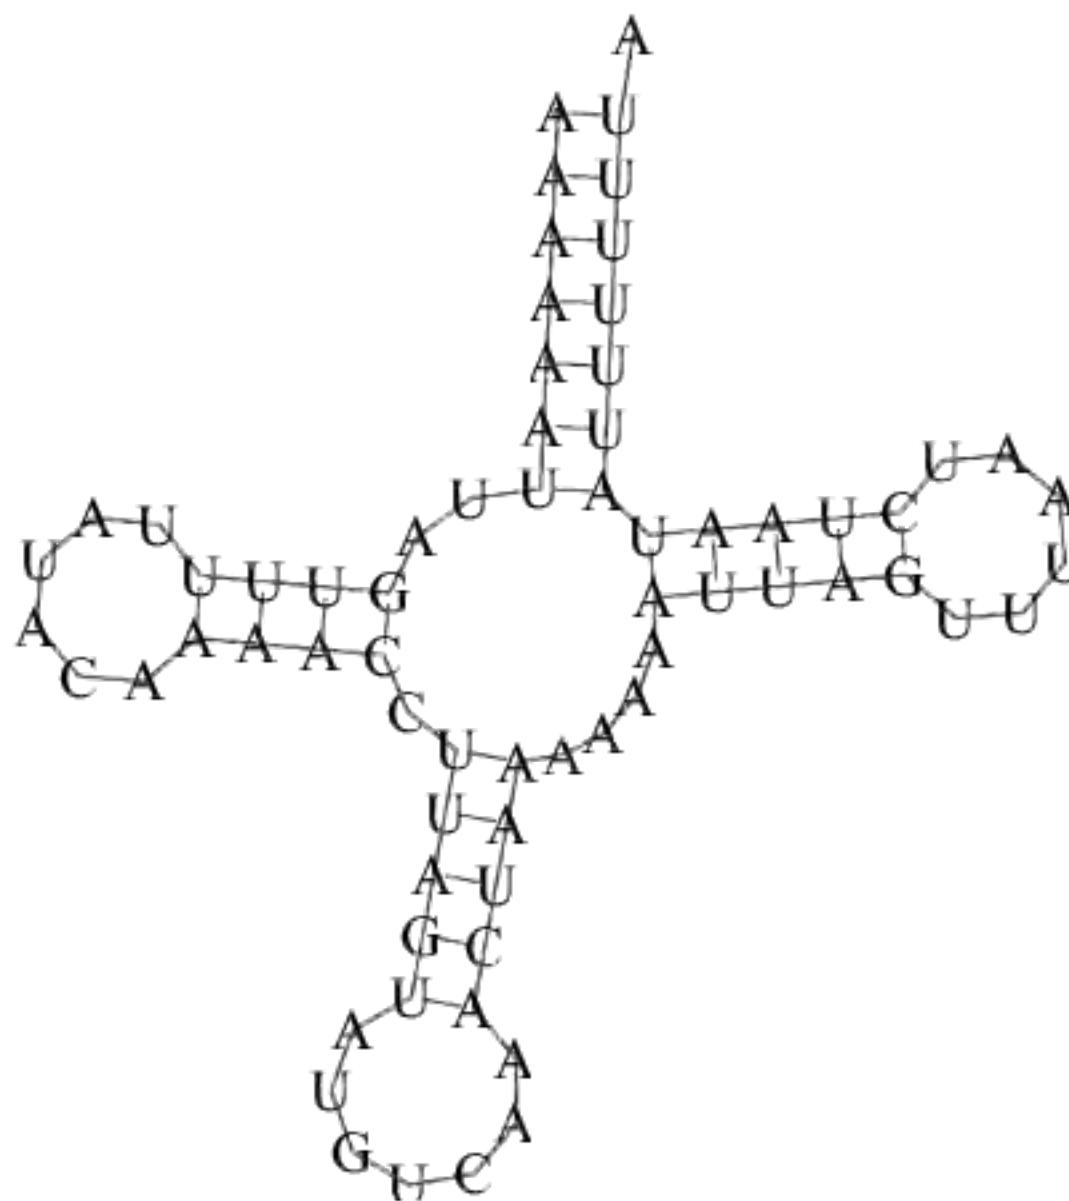

Cysteine(gca)

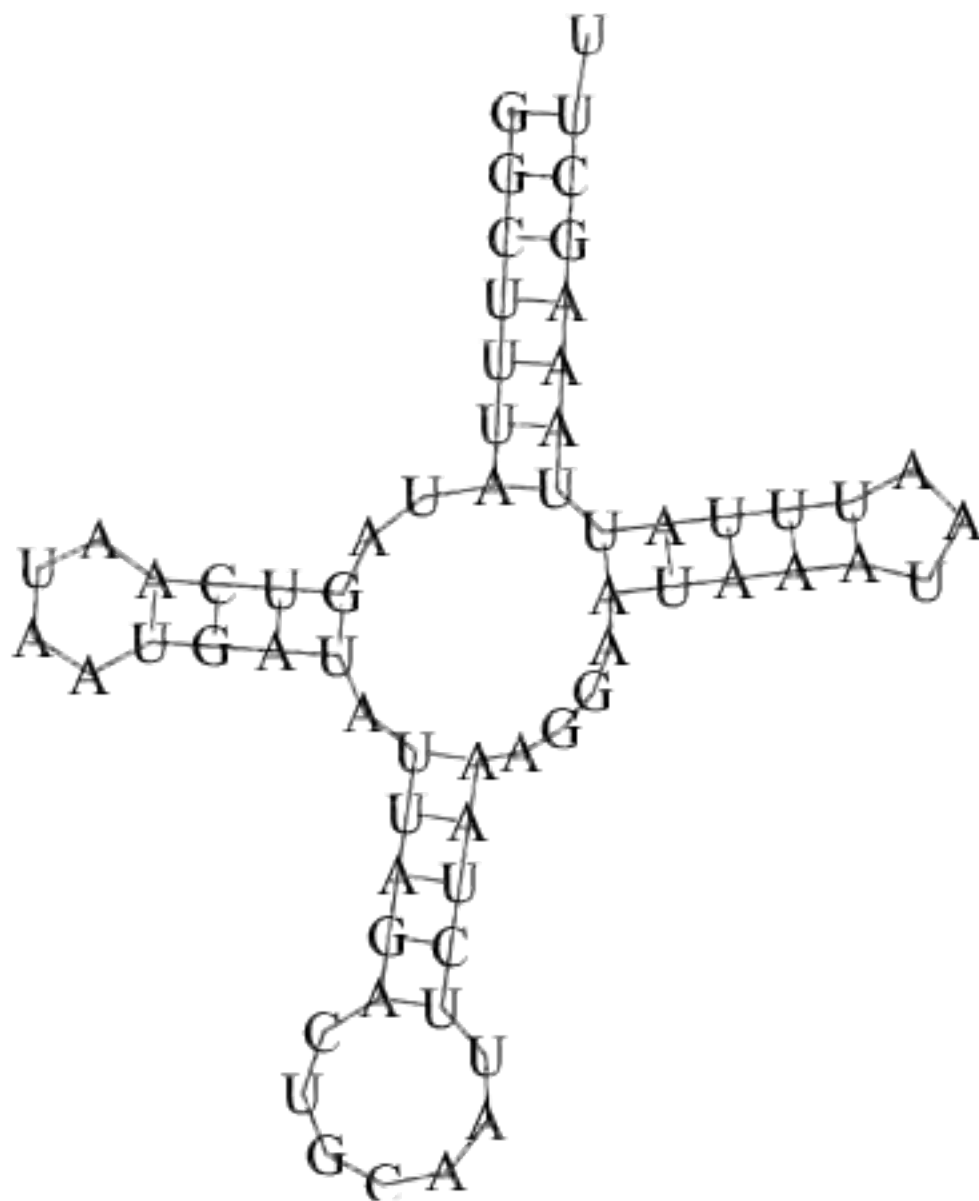

Glutamine(uuc)

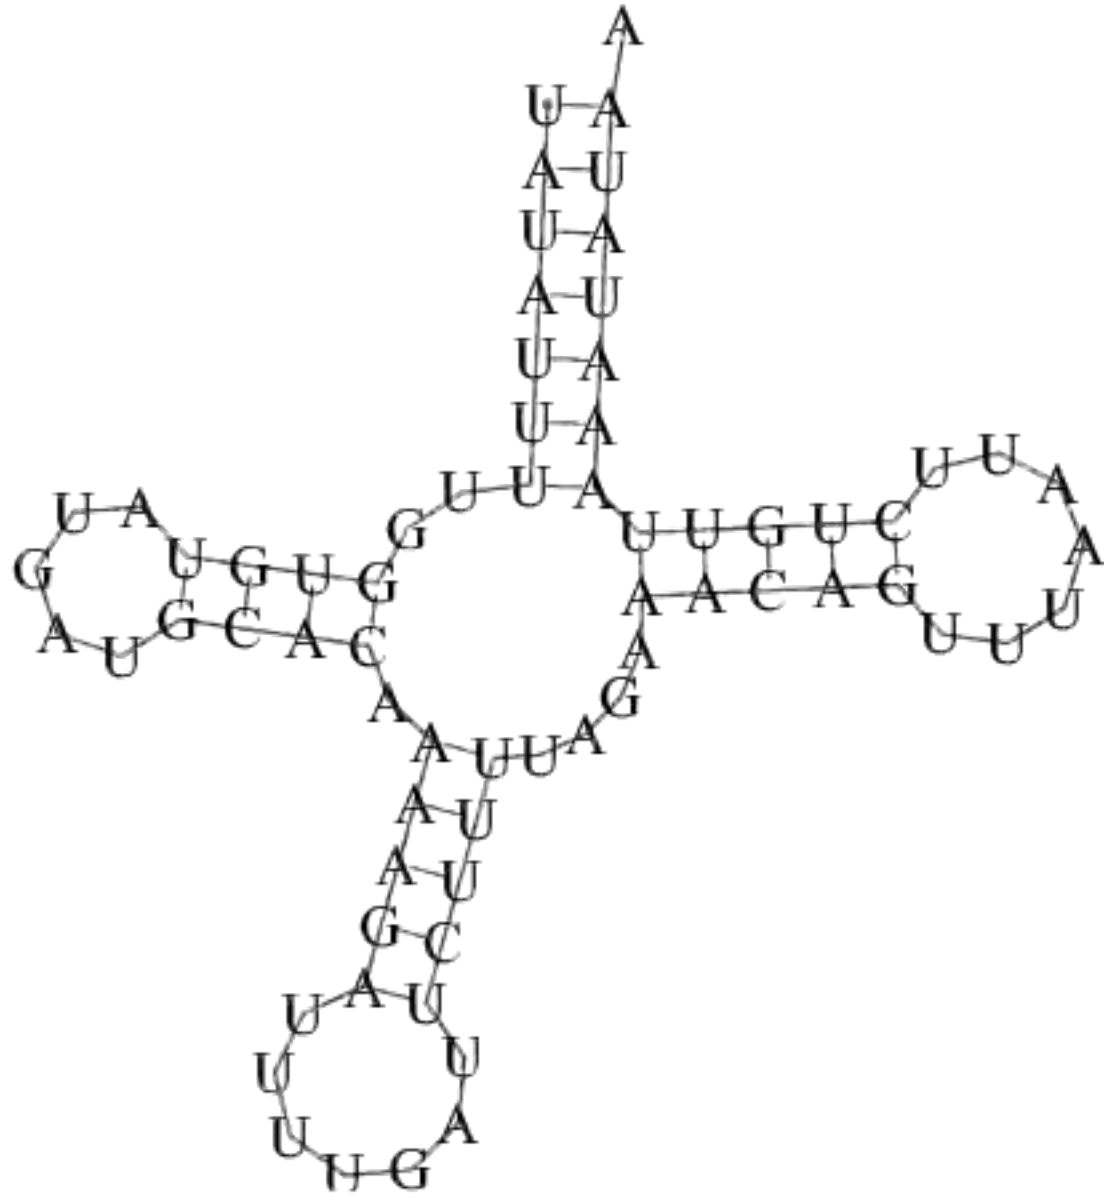

Glutamic acid(uug)

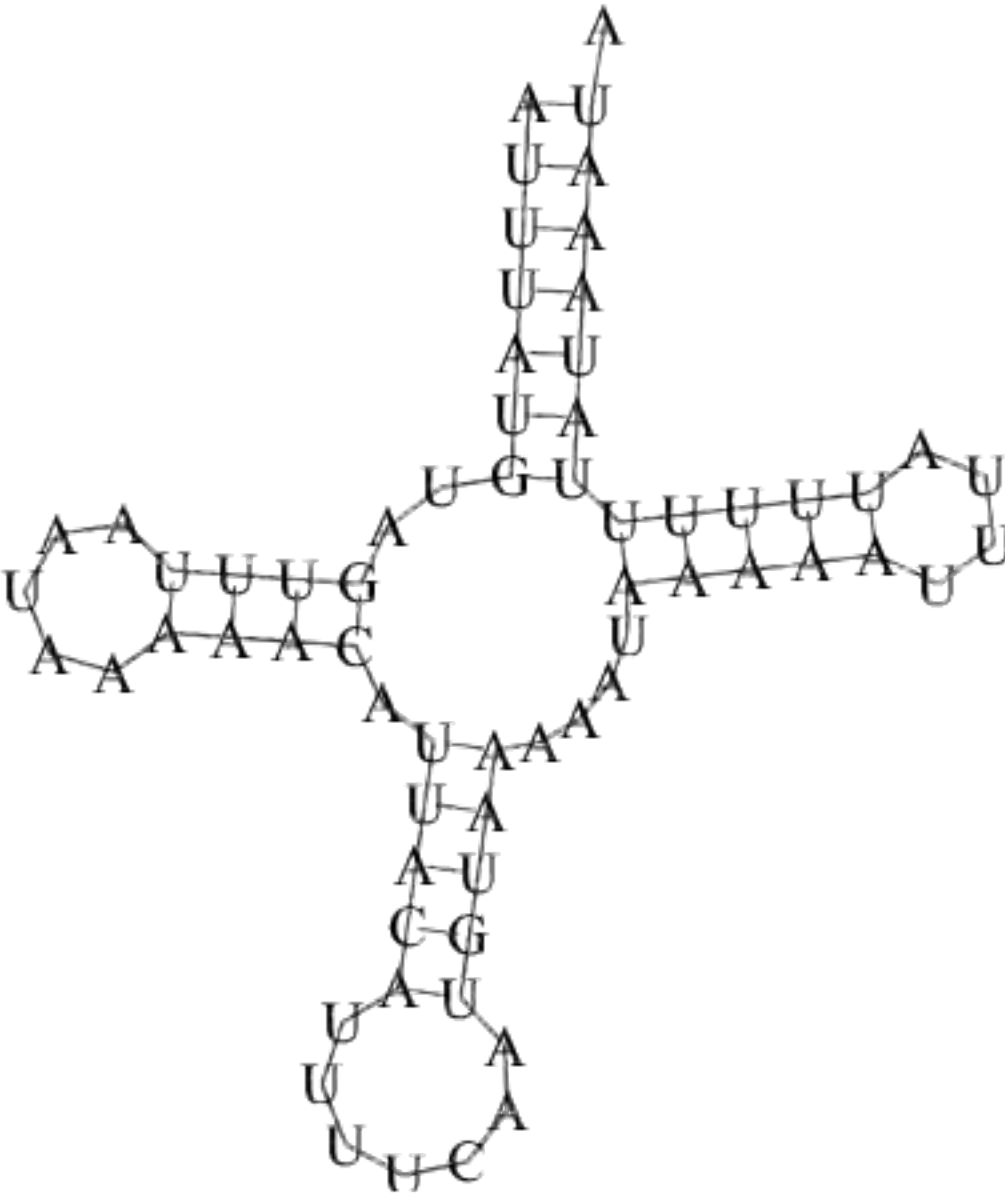

Glycine(ucc)

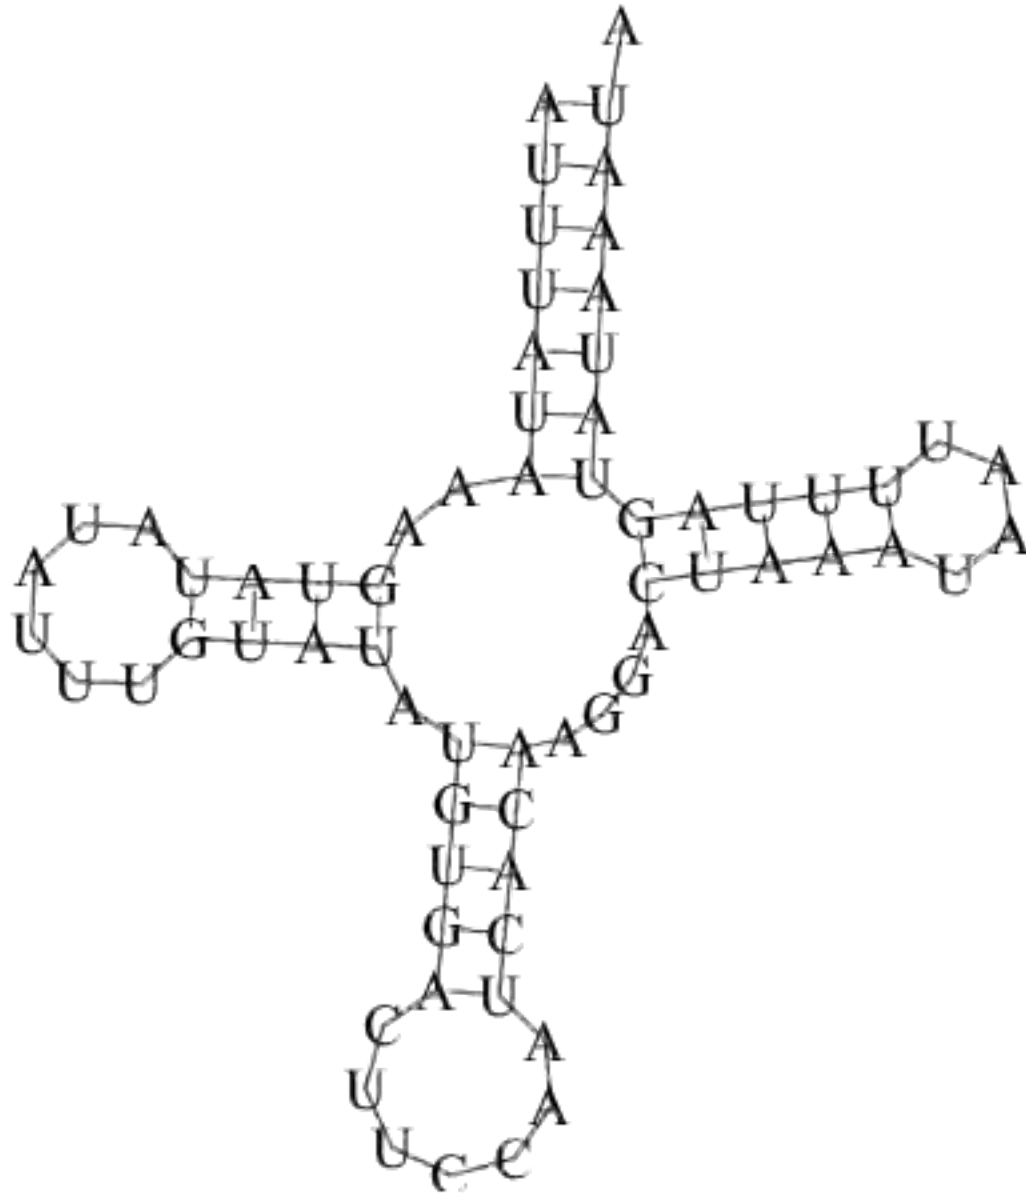

Histidine(gug)

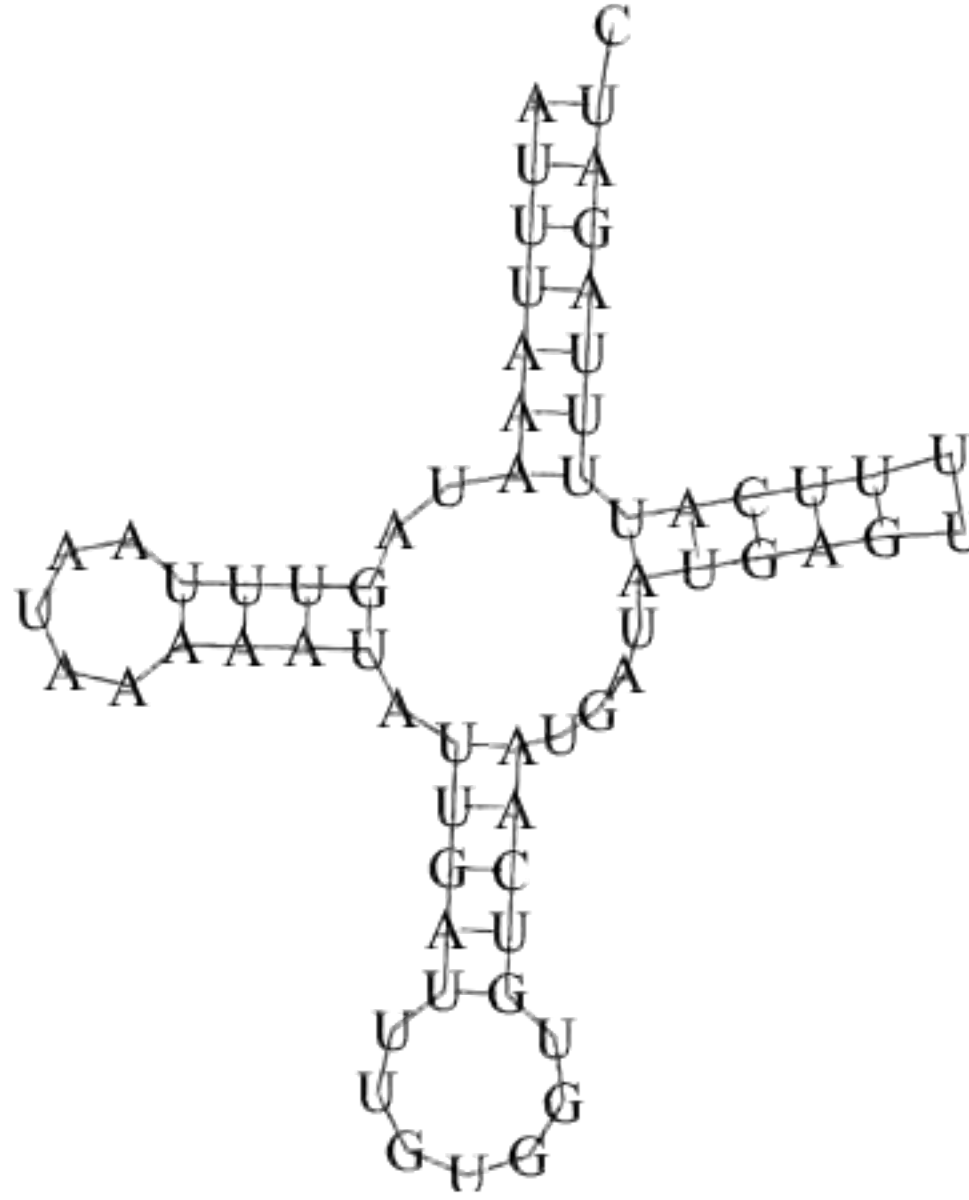

Isoleucine(gau)

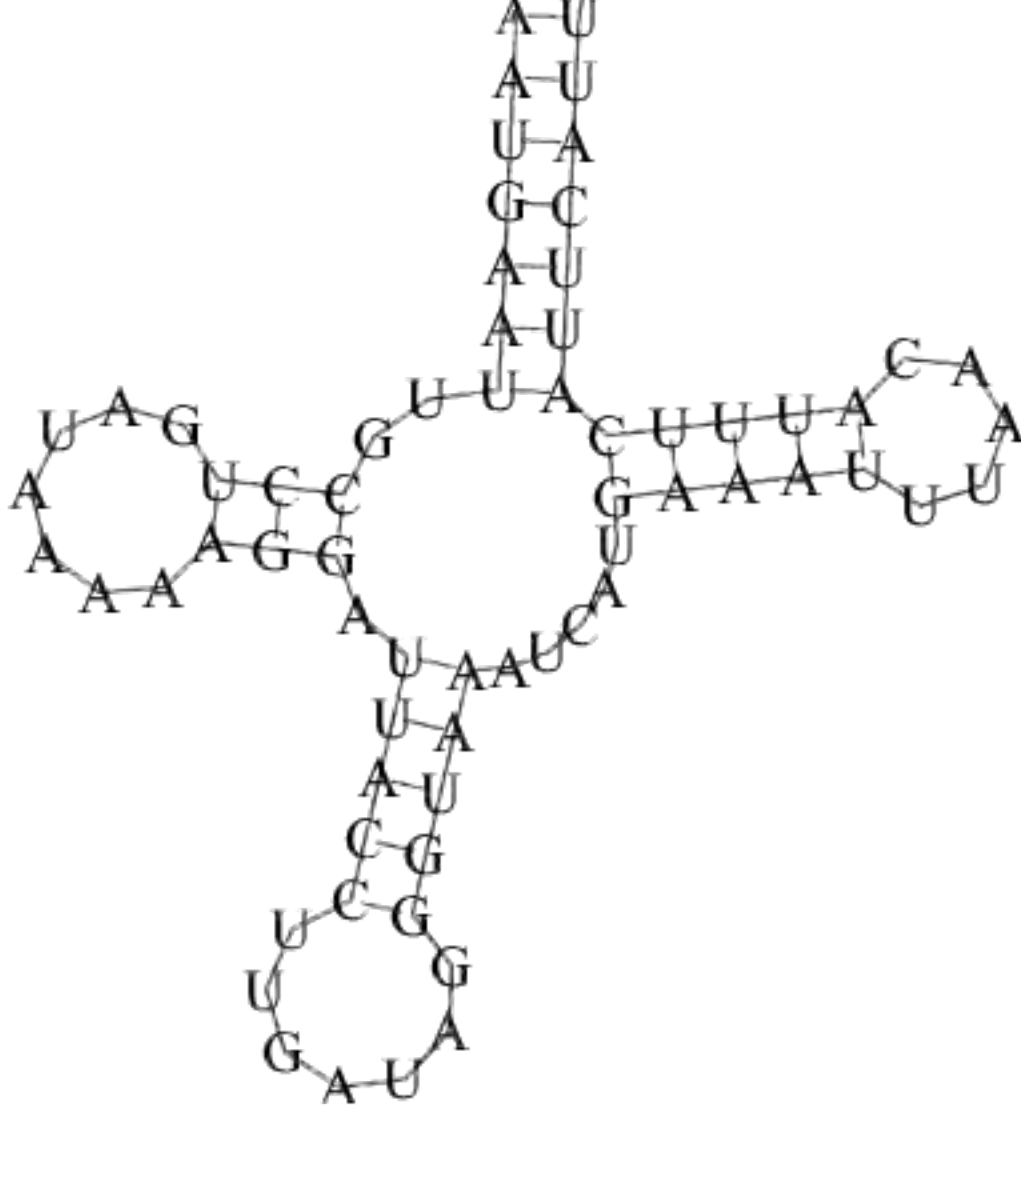

Leucine(uag)

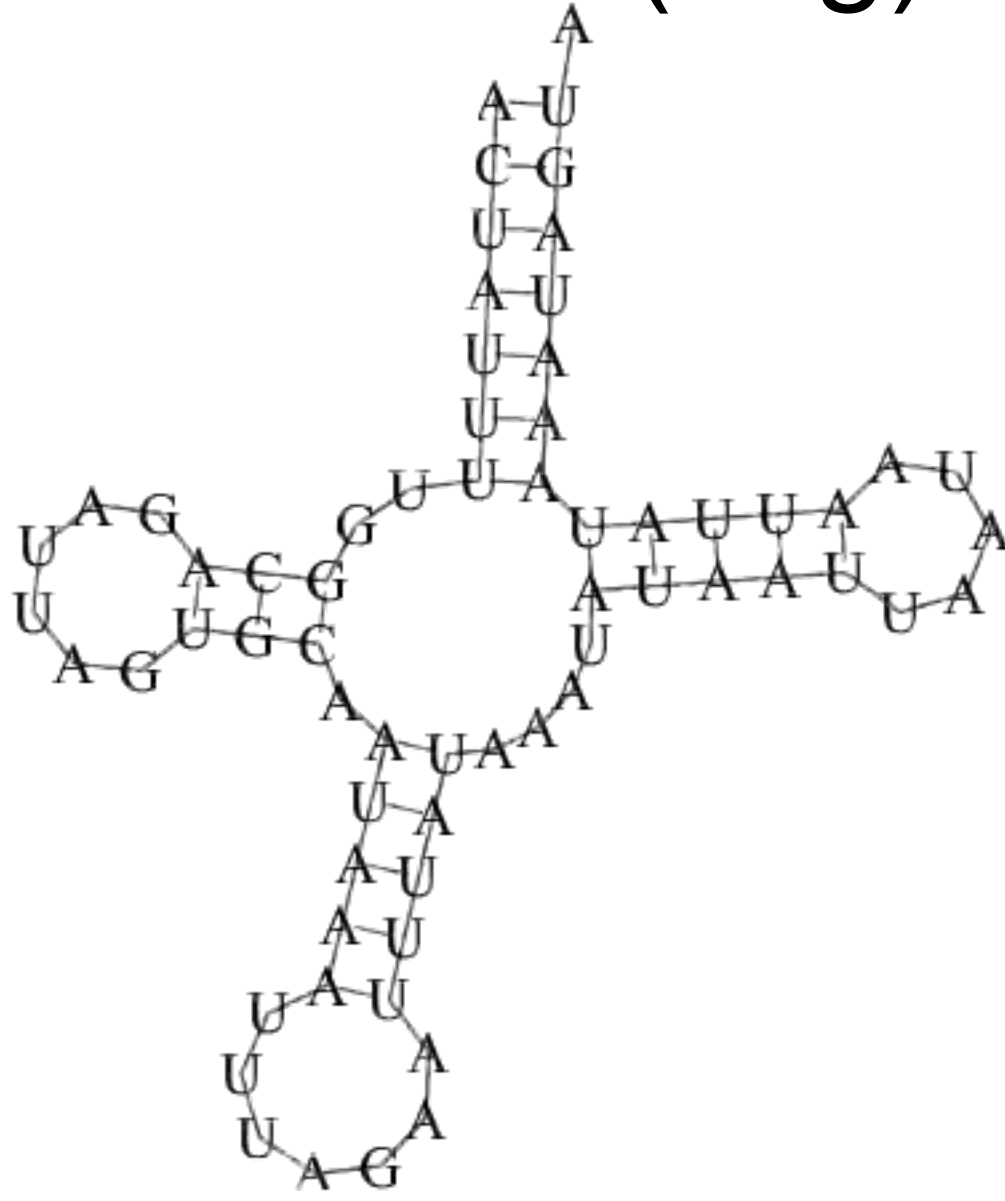

Leucine(uaa)

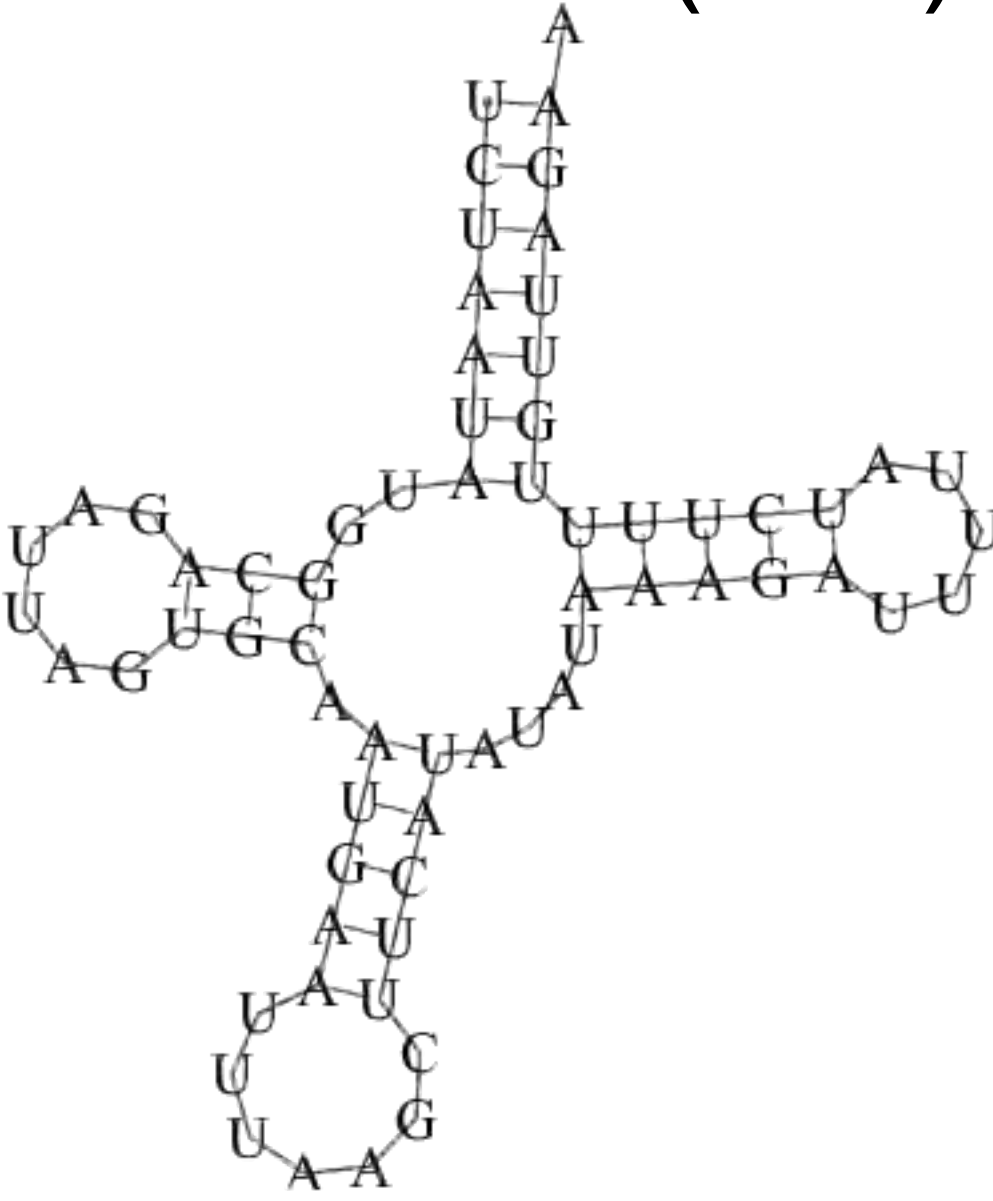

Lysine(cuu)

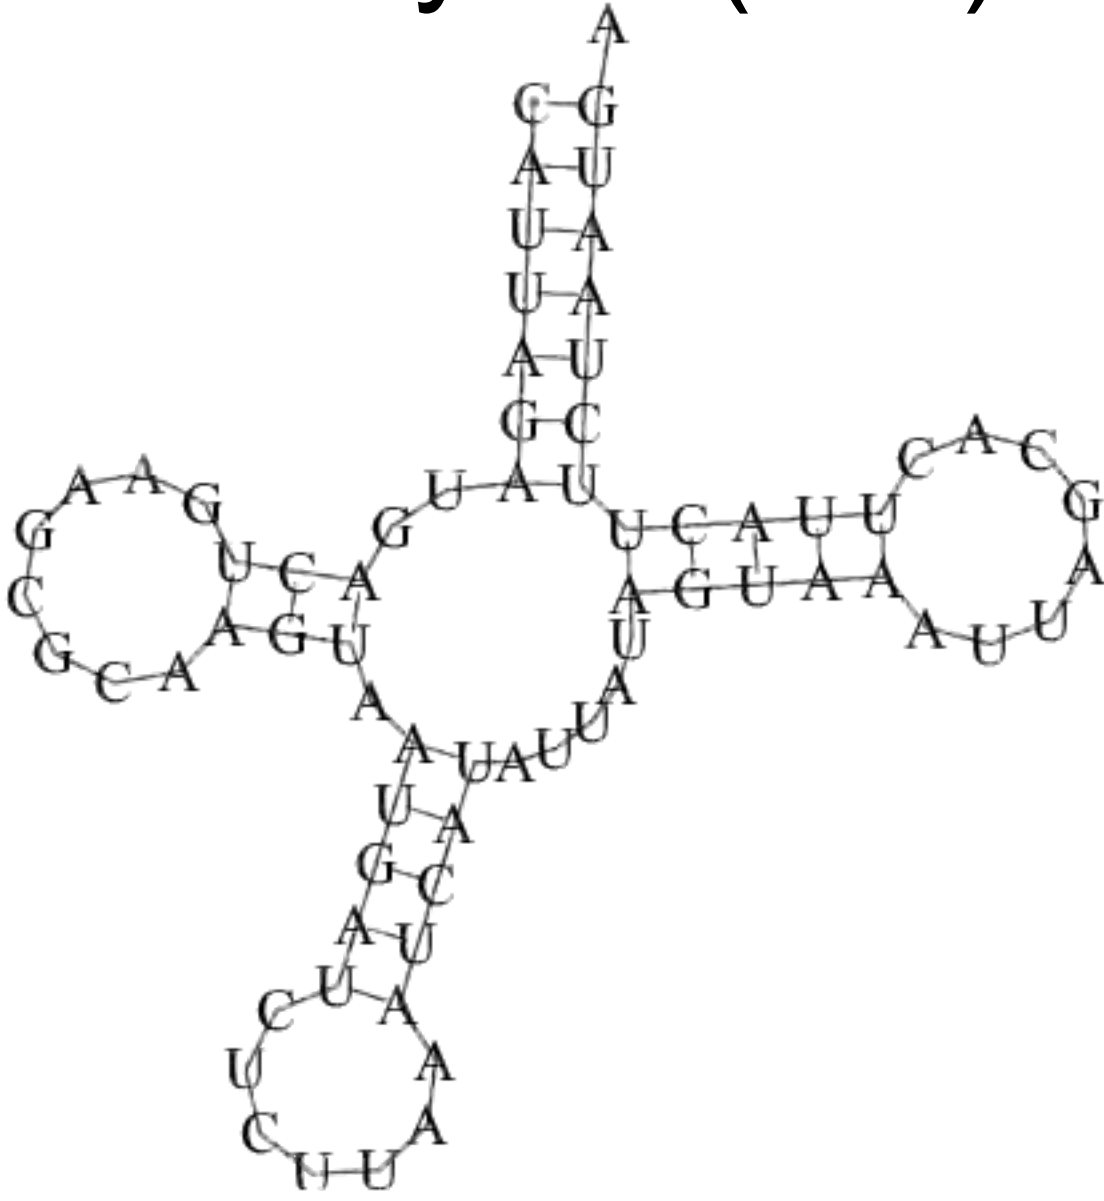

Methionine(cau)

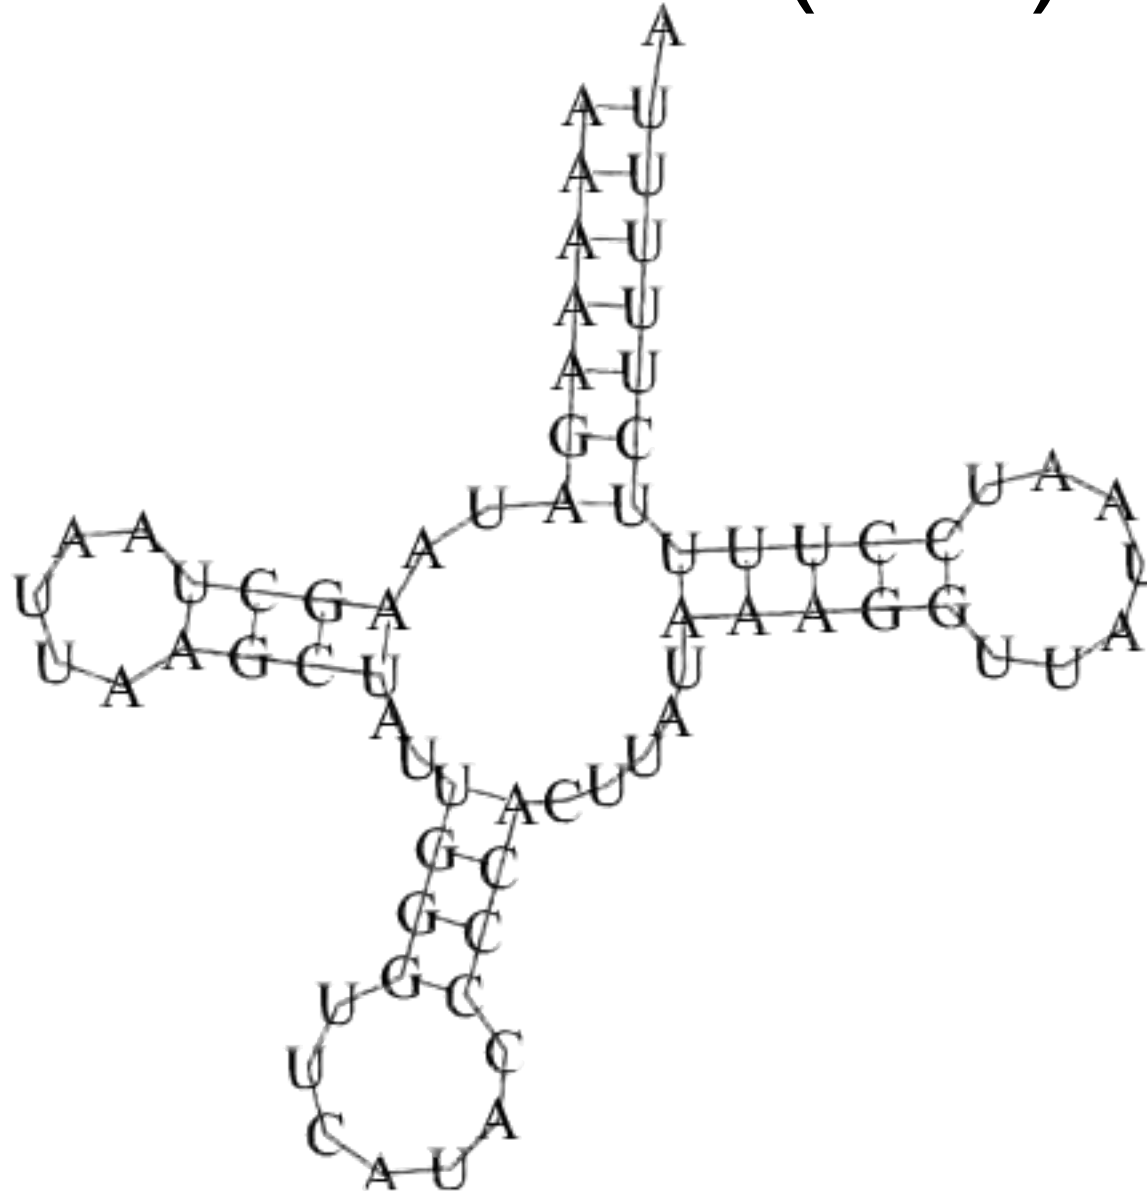

Phenylalanine(gaa)

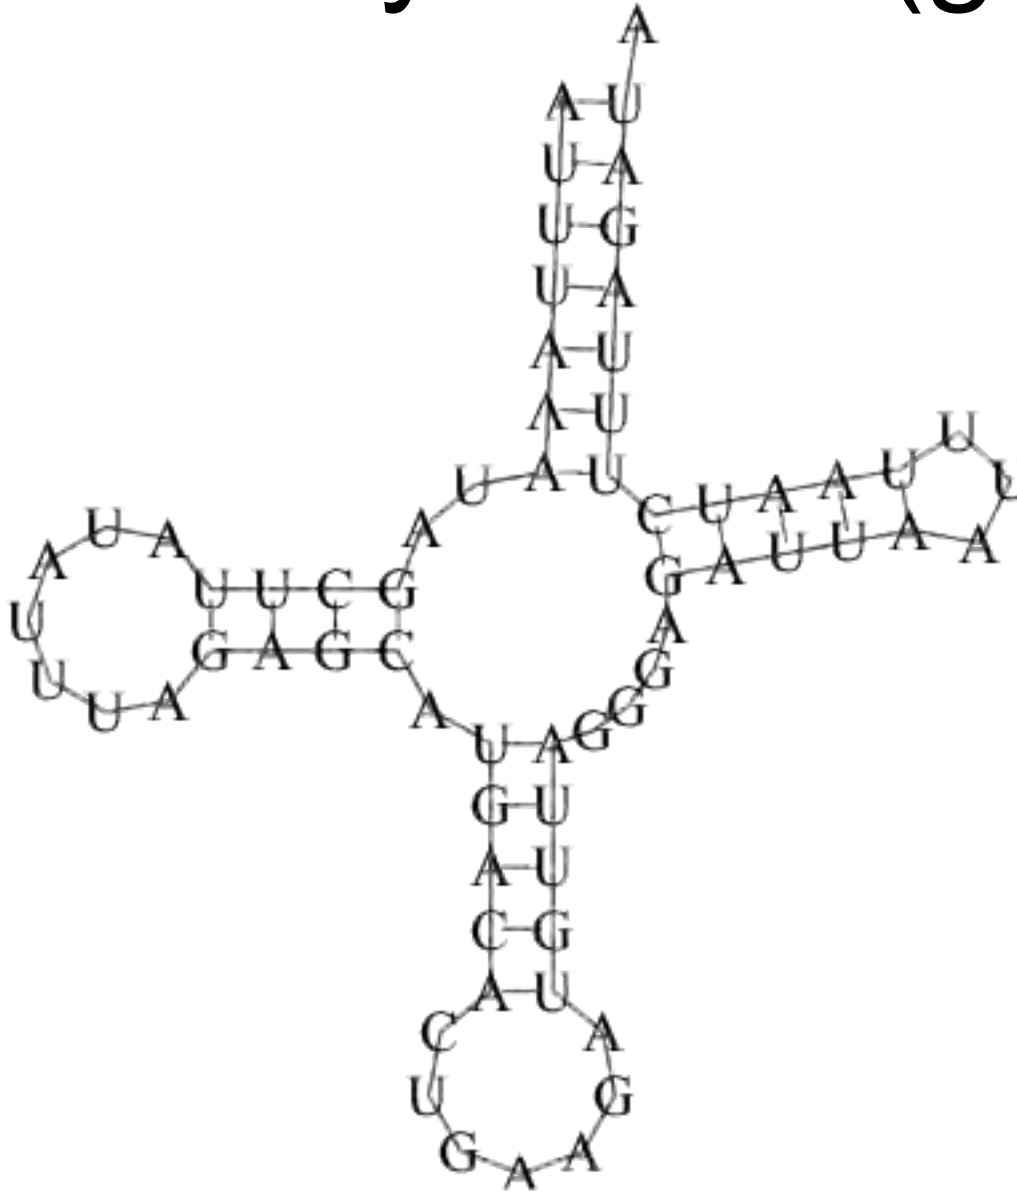

Proline(ugg)

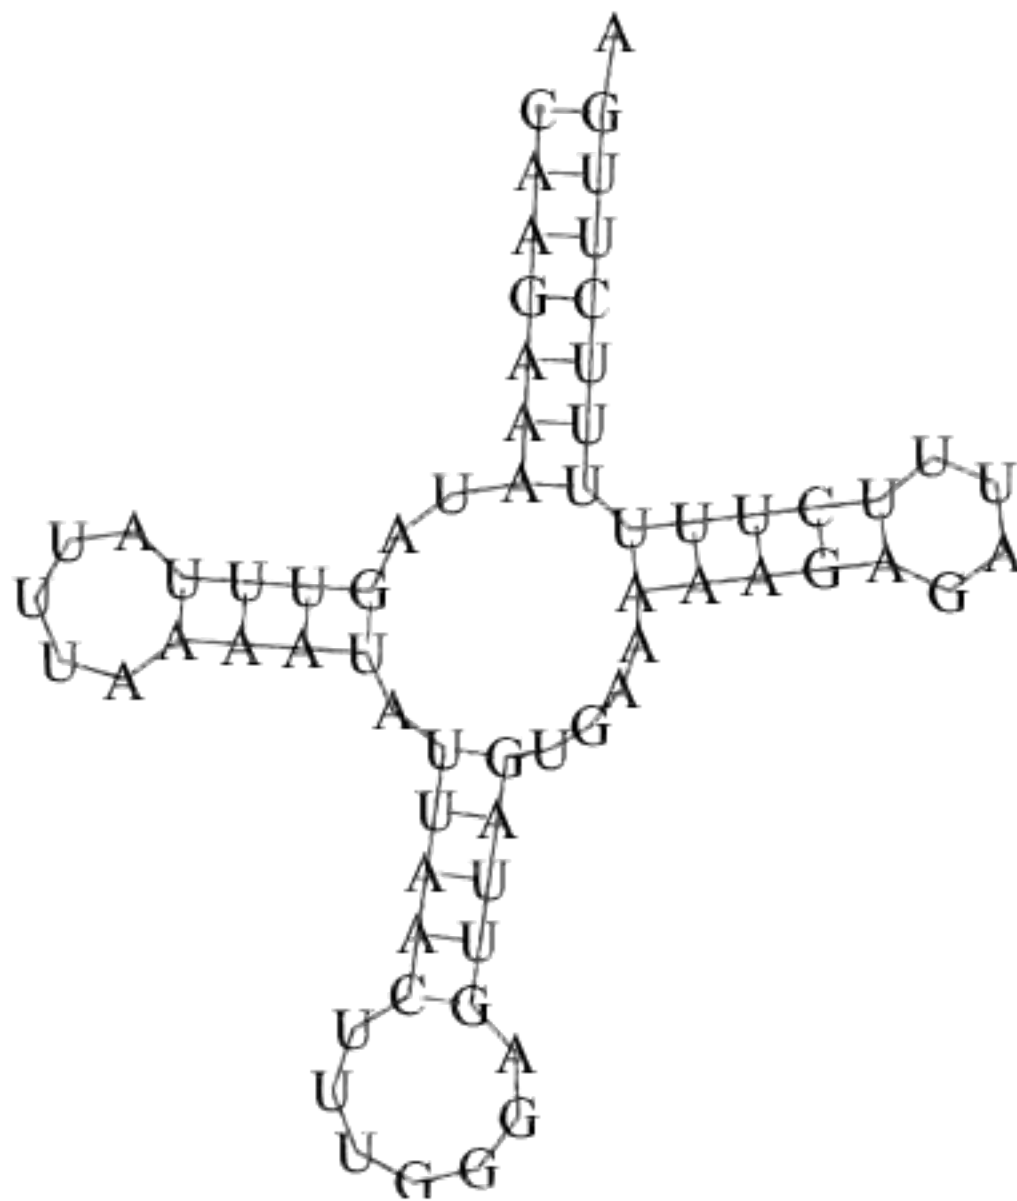

Serine(gcu)

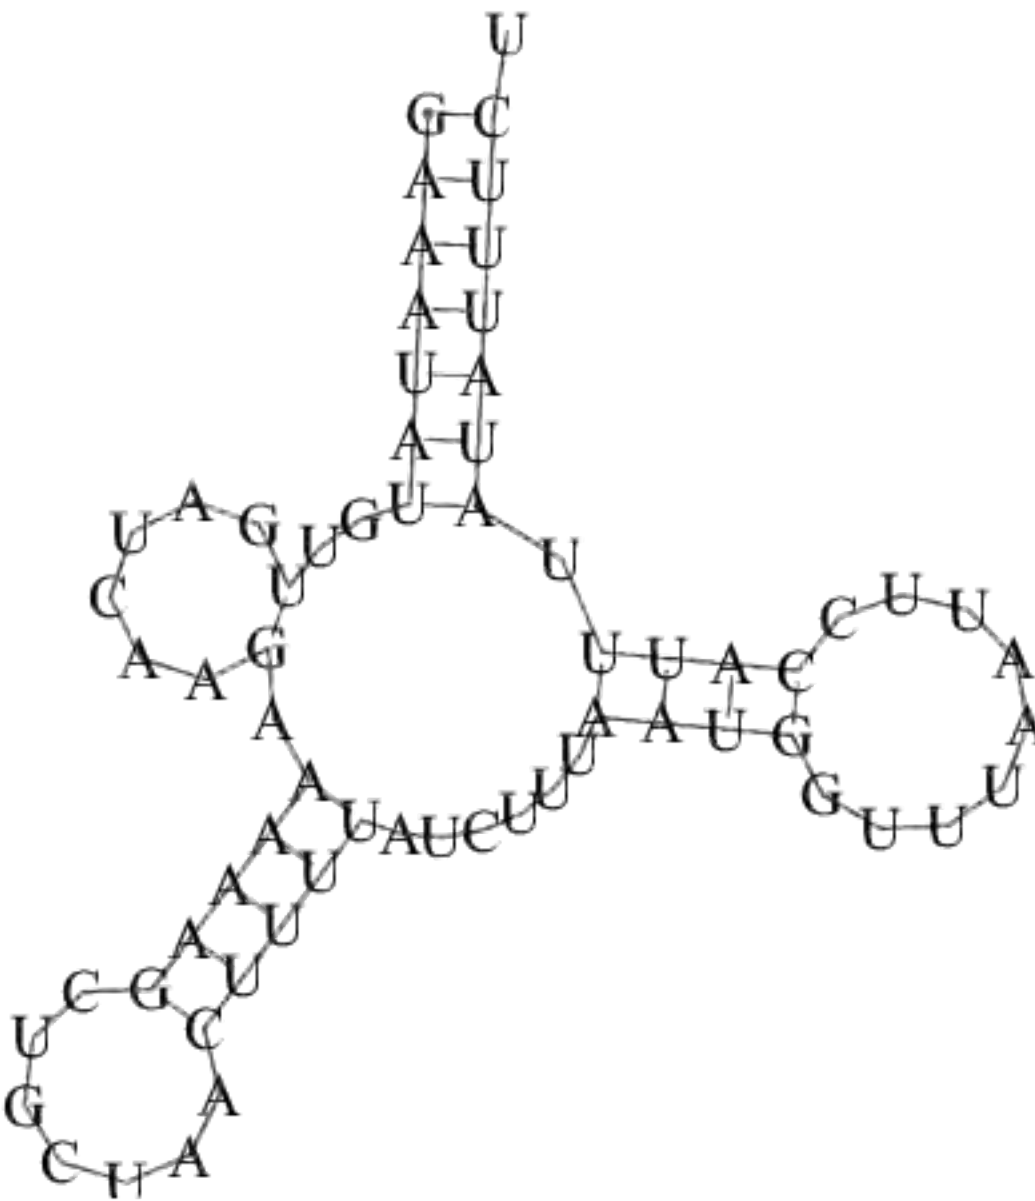

Serine(uga)

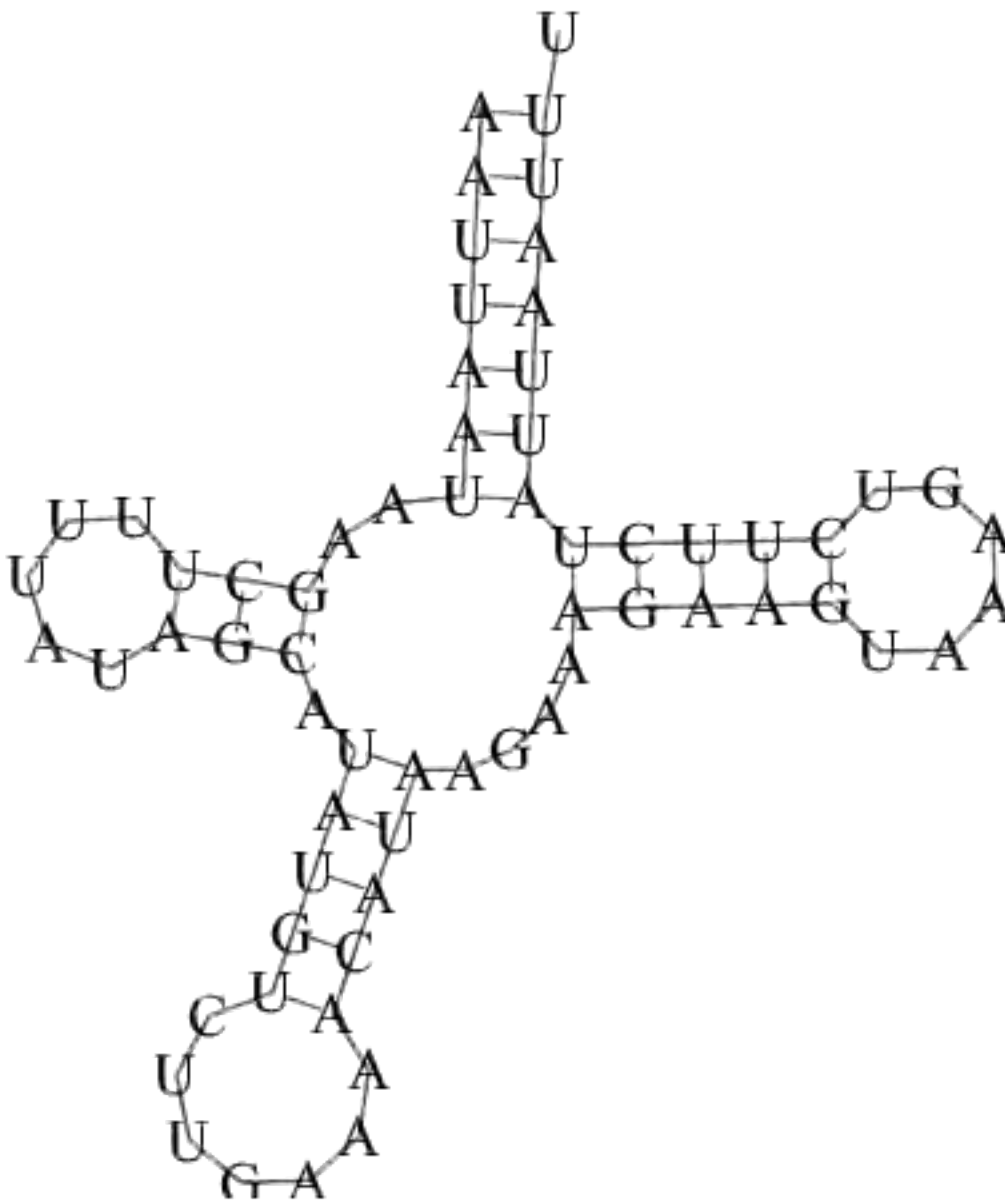

Threonine(ugu)

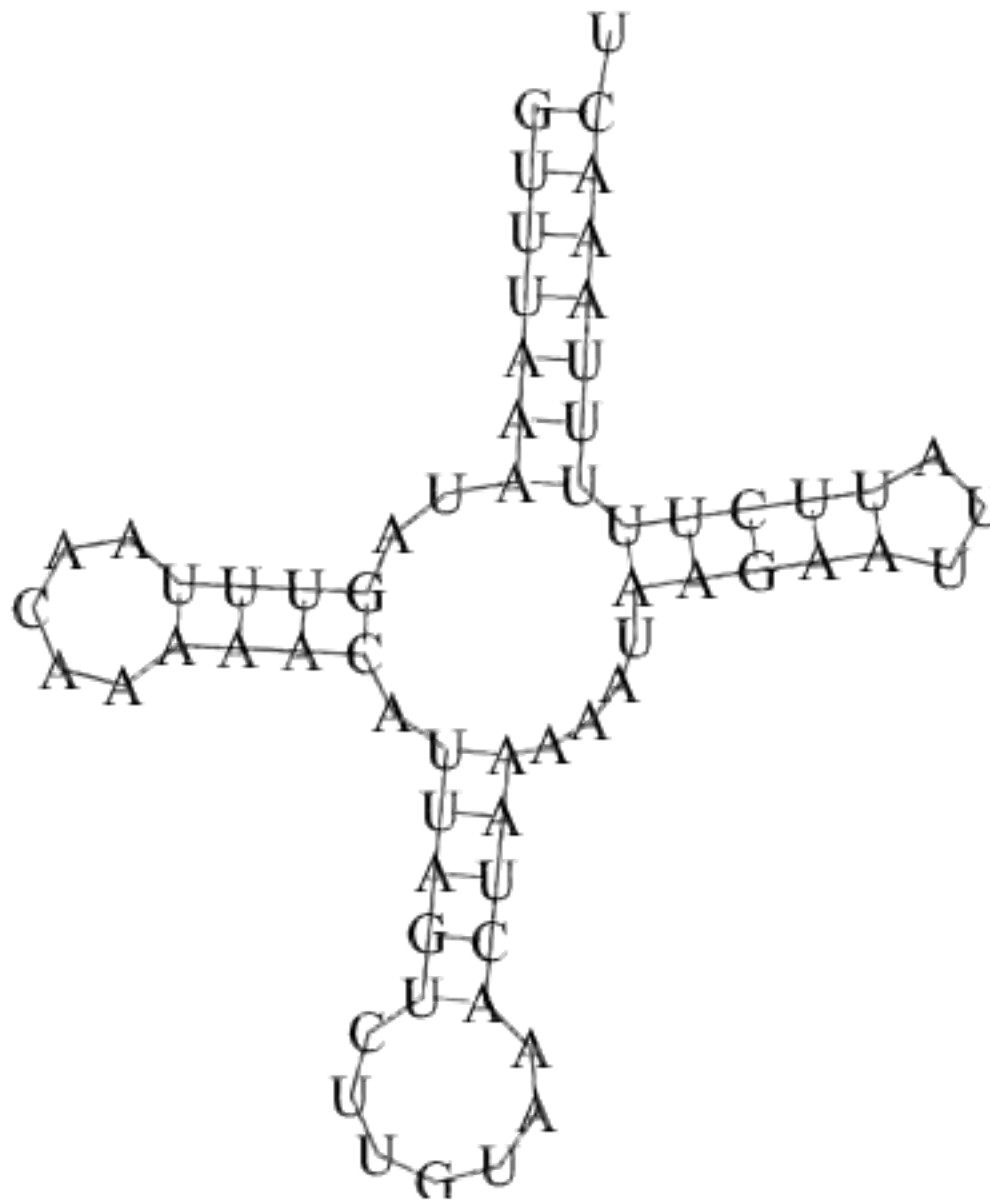

Tryptophan(uca)

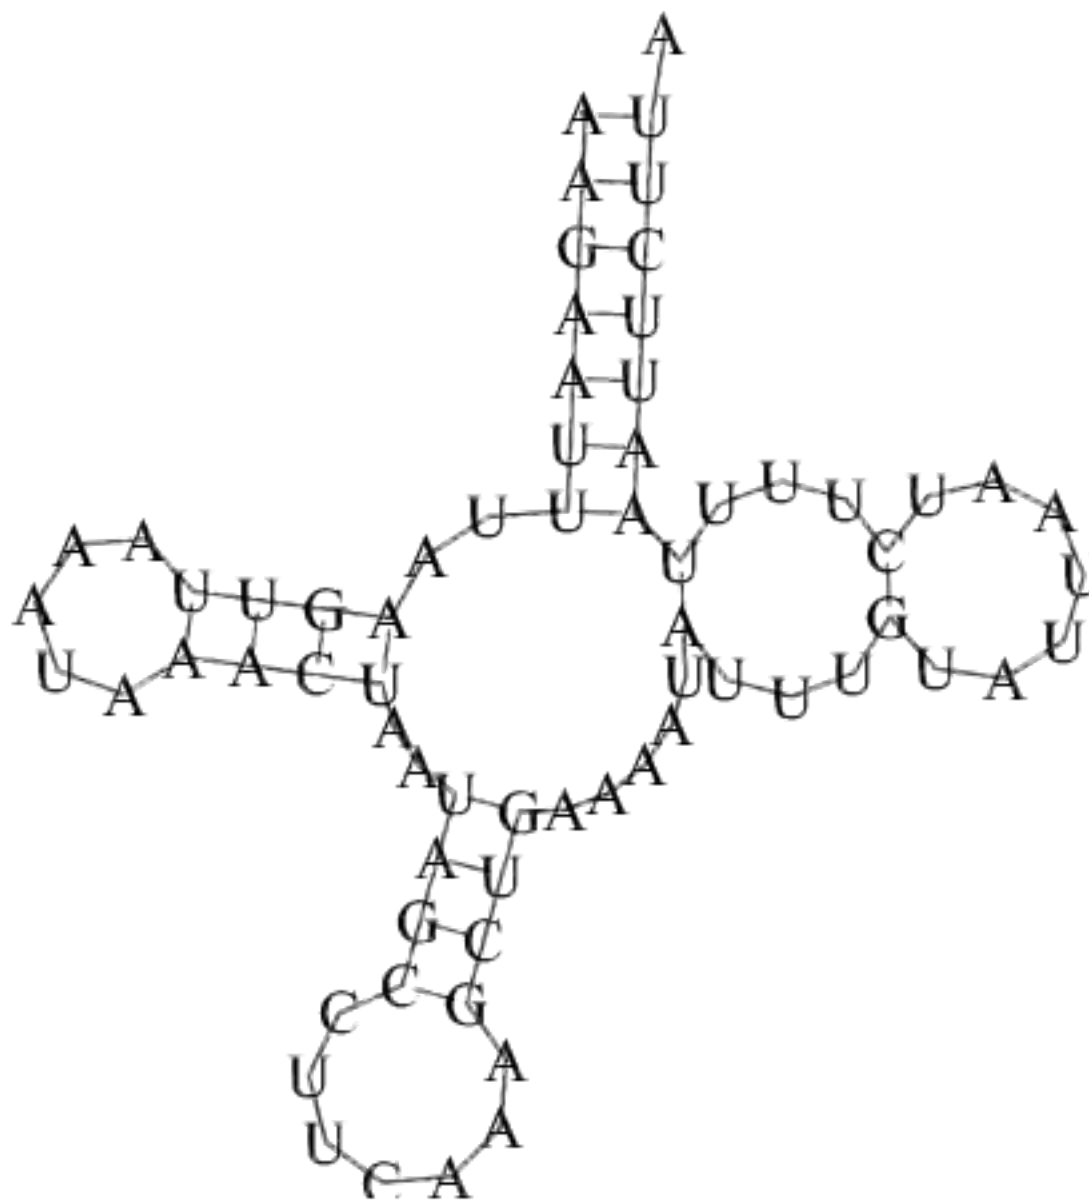

Tyrosine(gua)

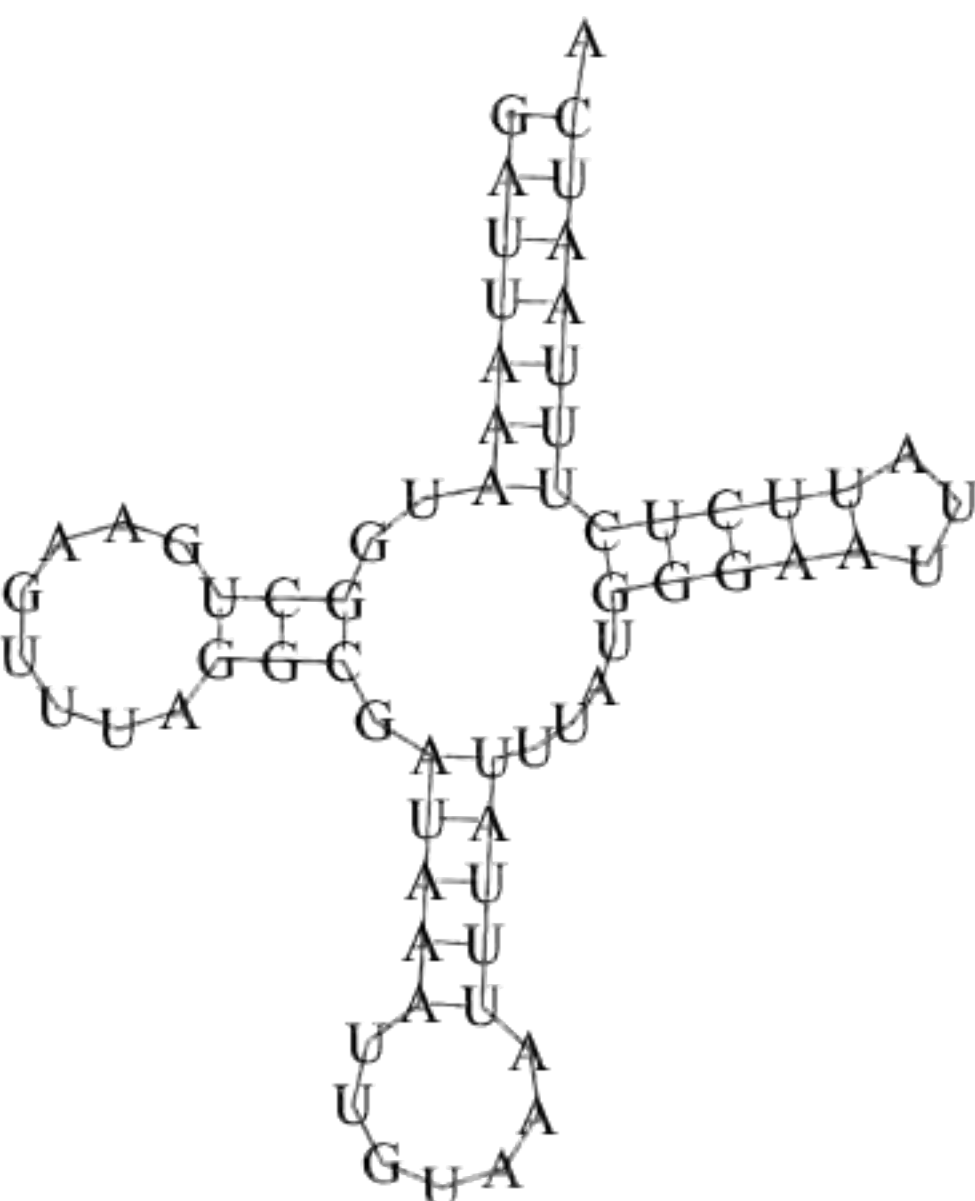

Valine(uac)

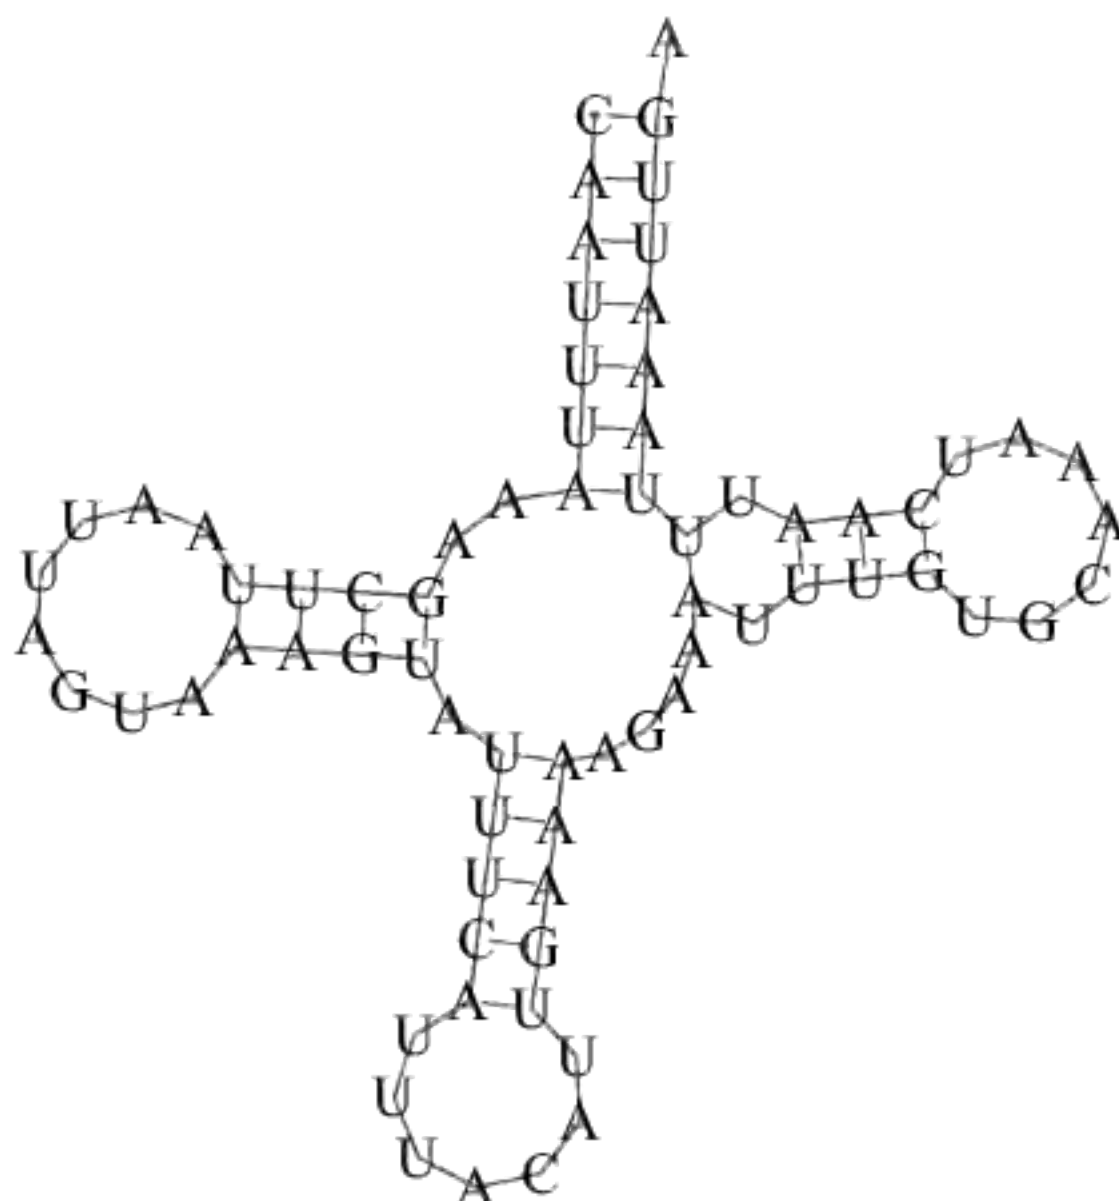



*An. kleini*

Alanine(ugc)

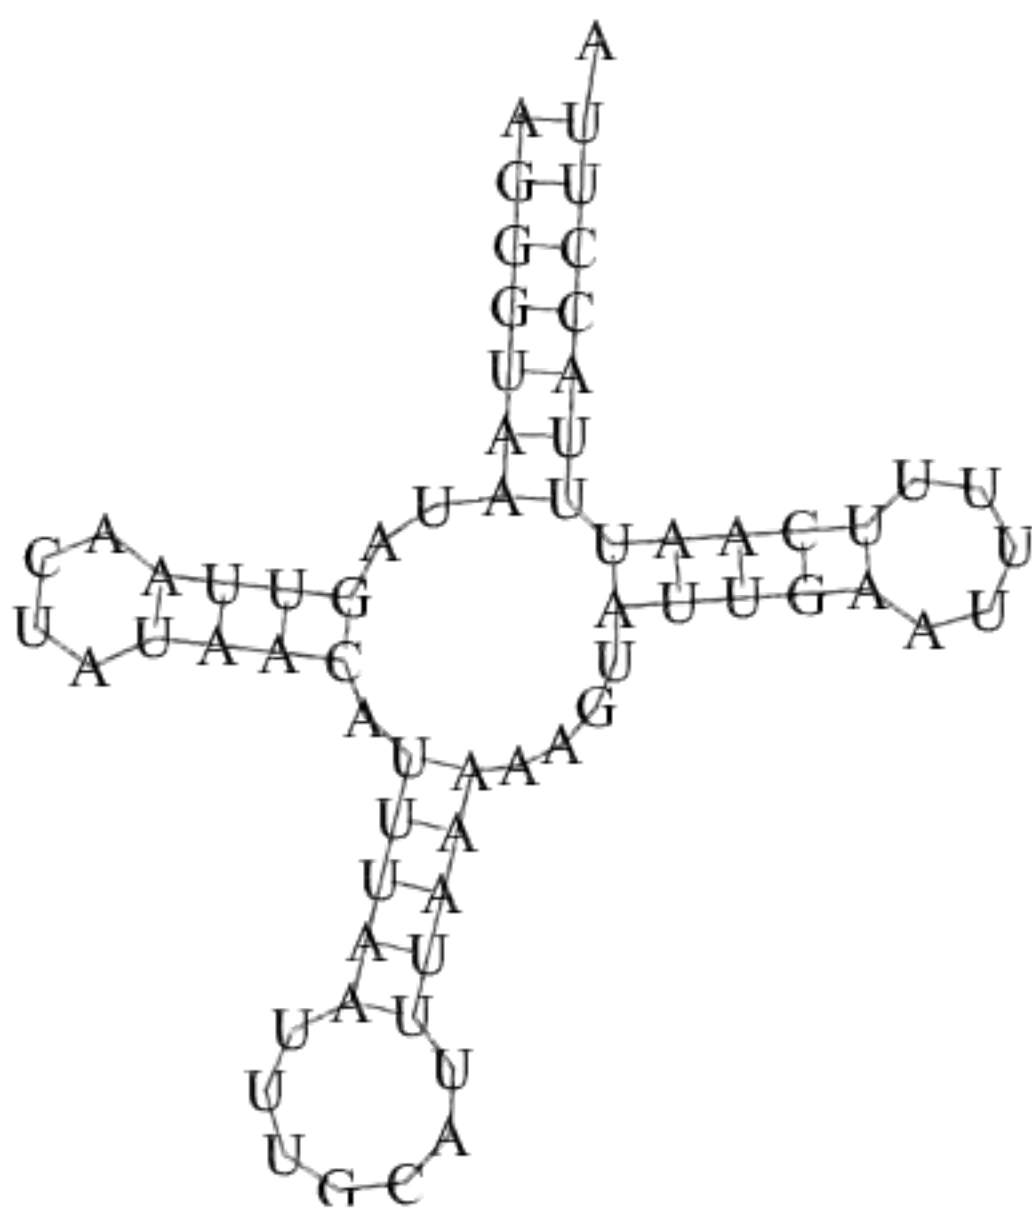

Arginine(ucg)

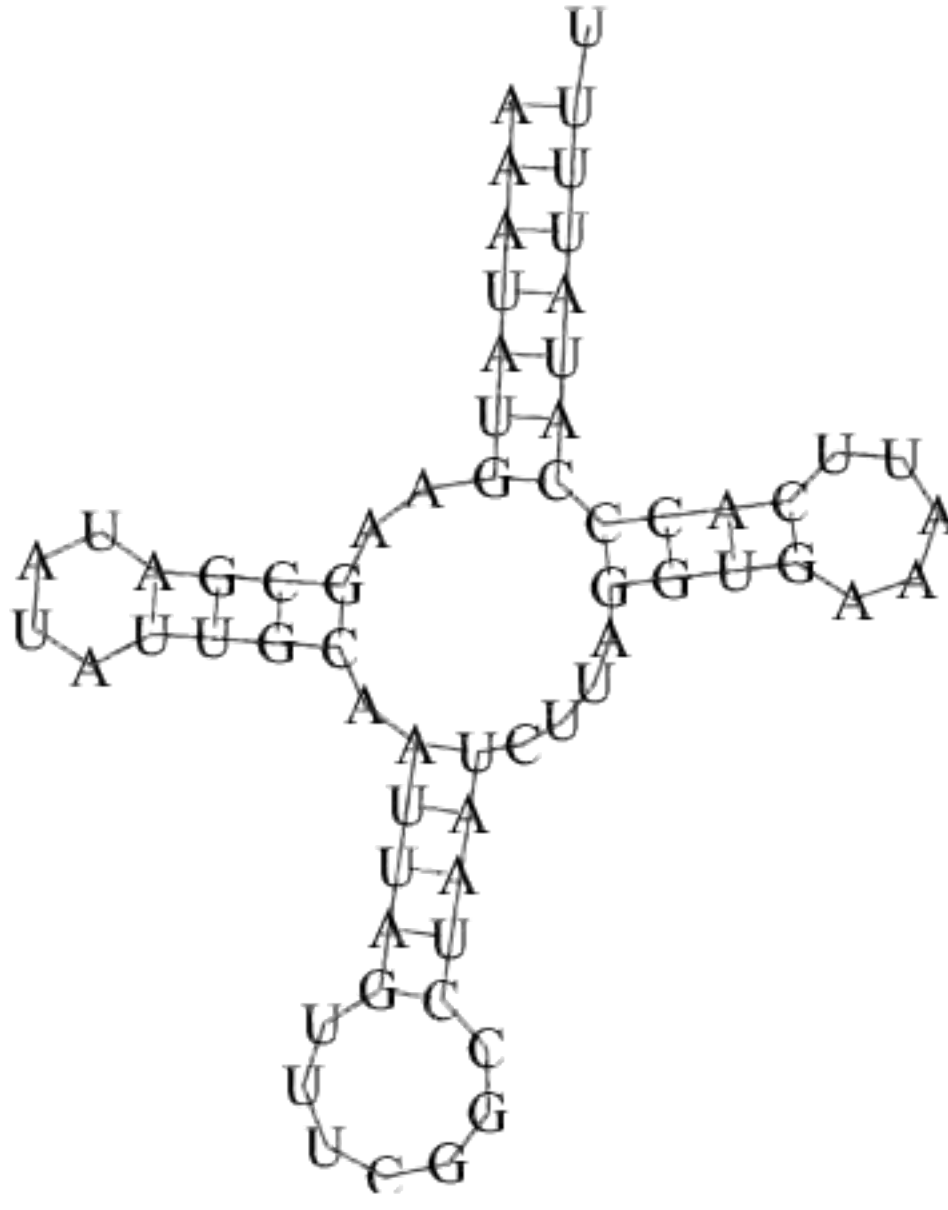

Asparagine(guu)

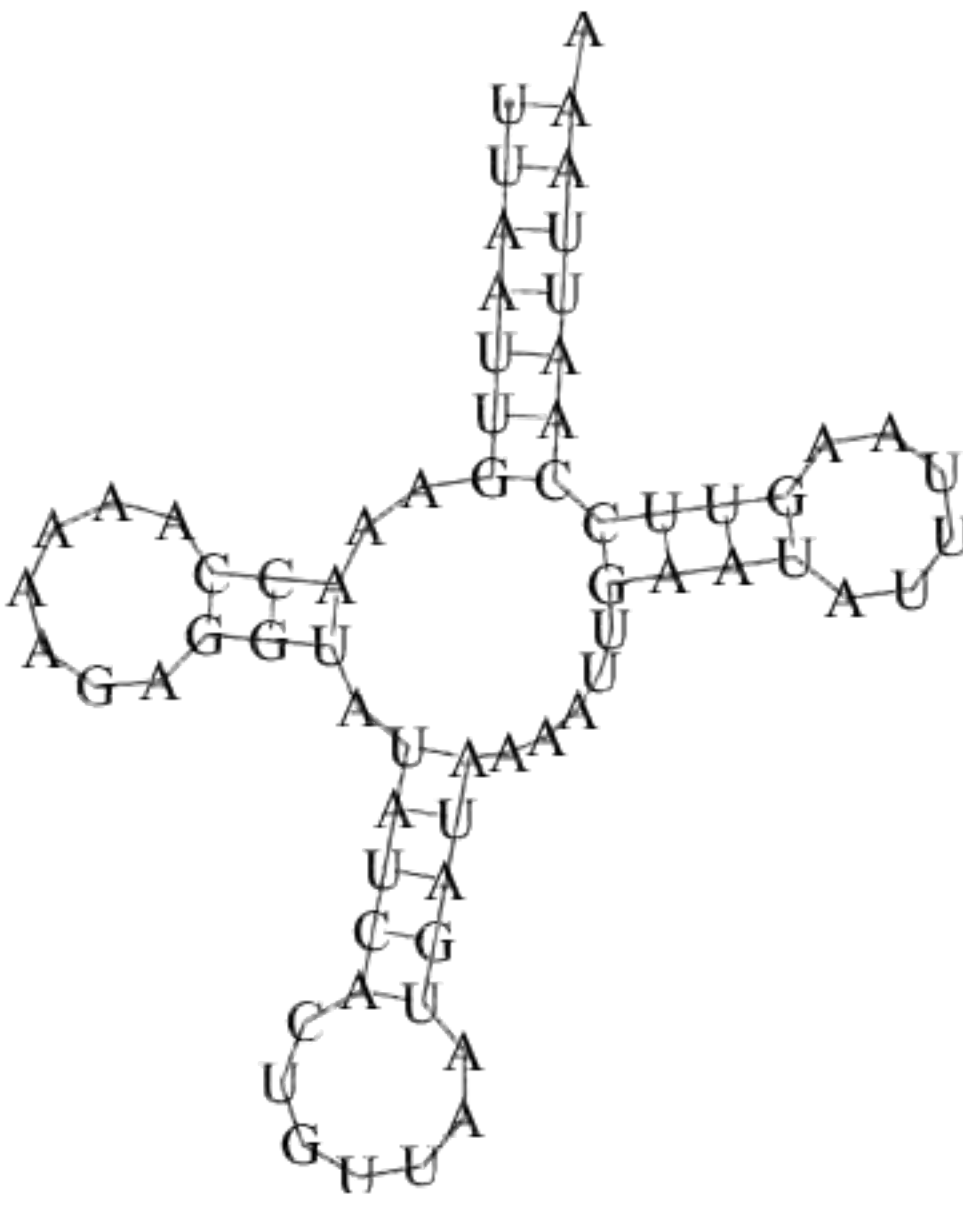

Aspartic acid(guc)

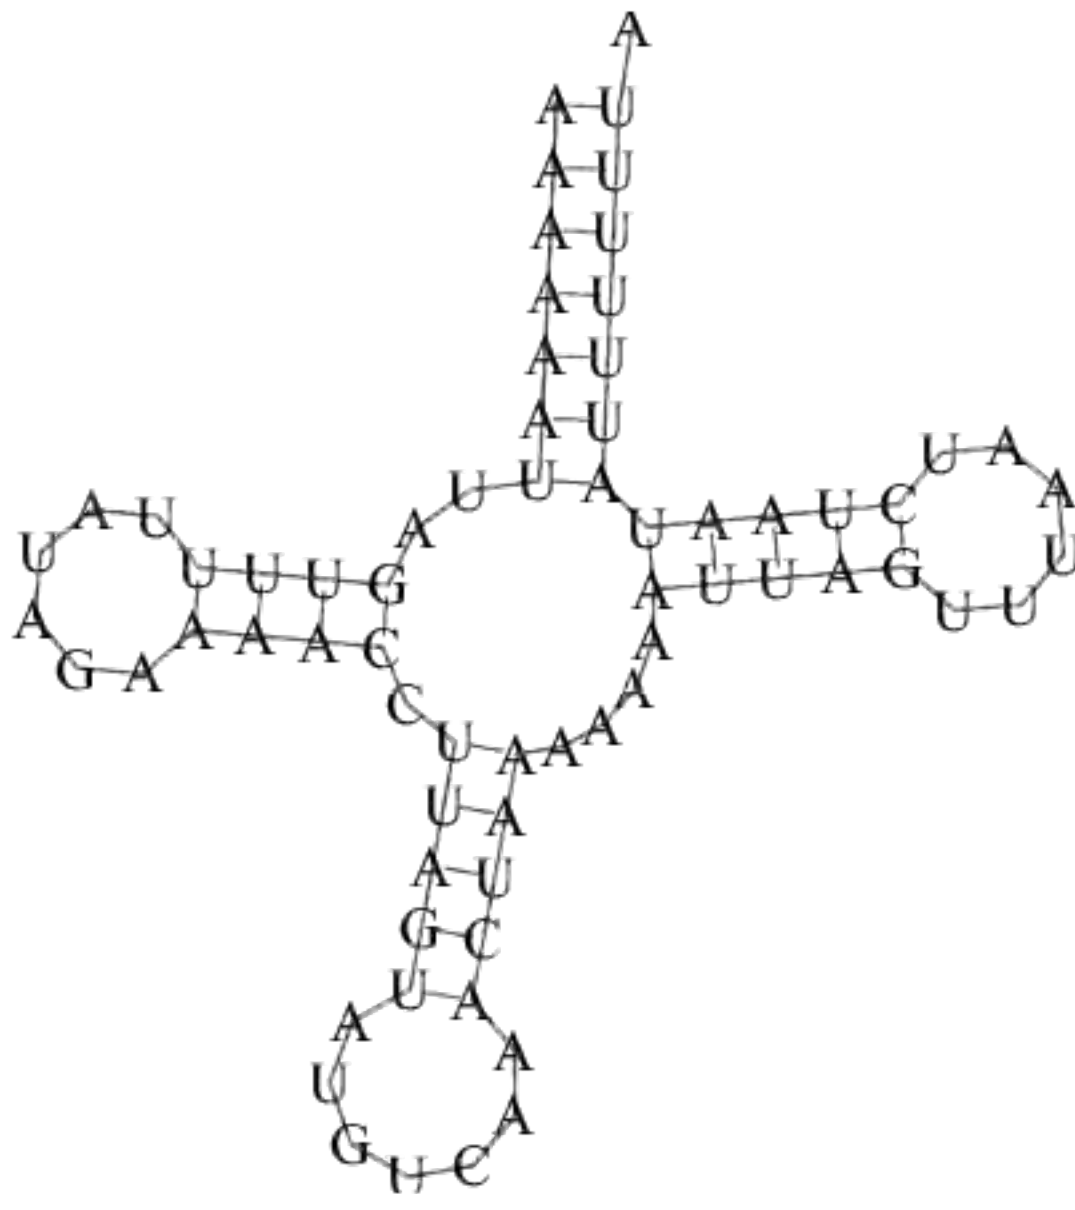

Cysteine(gca)

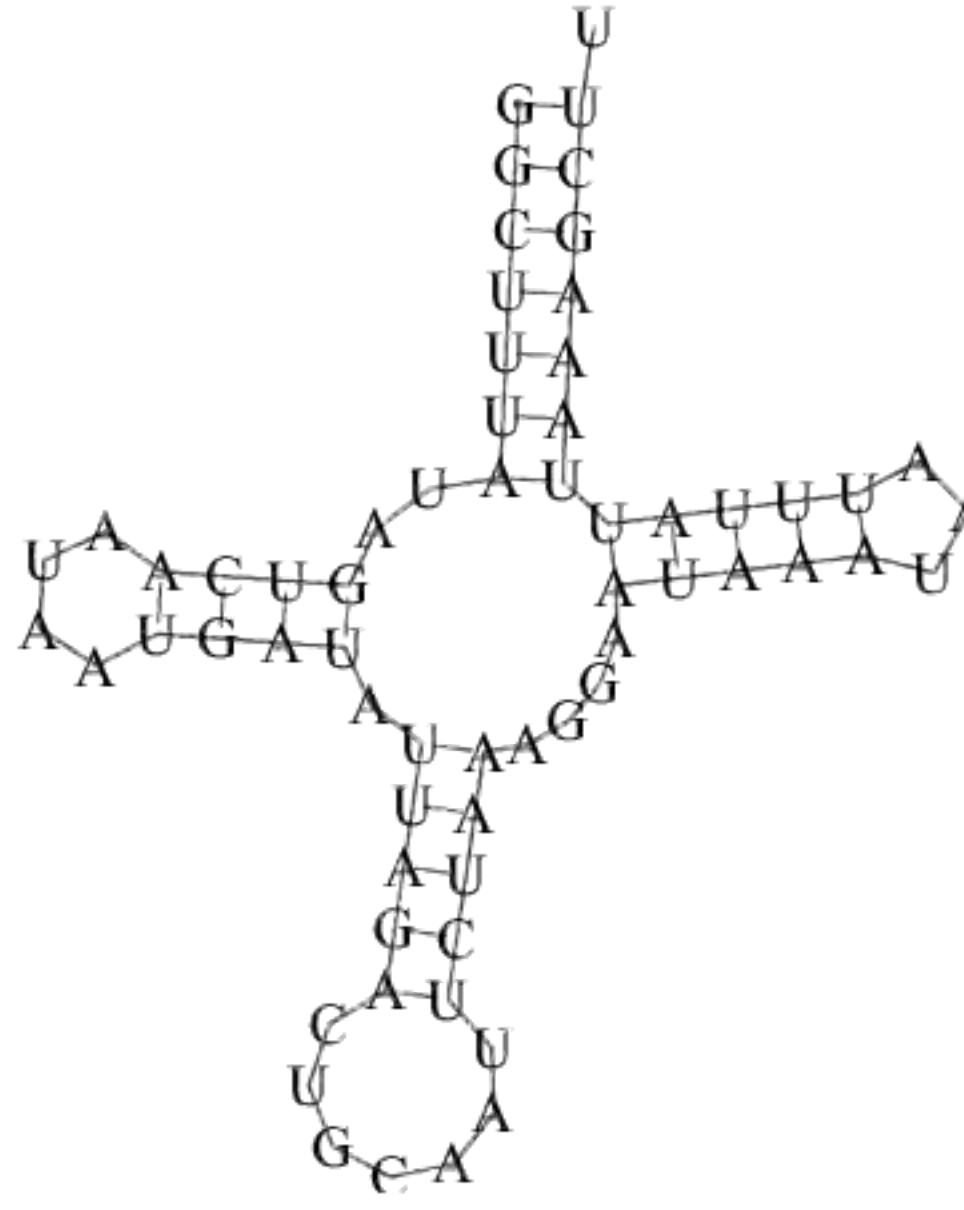

Glutamine(uuc)

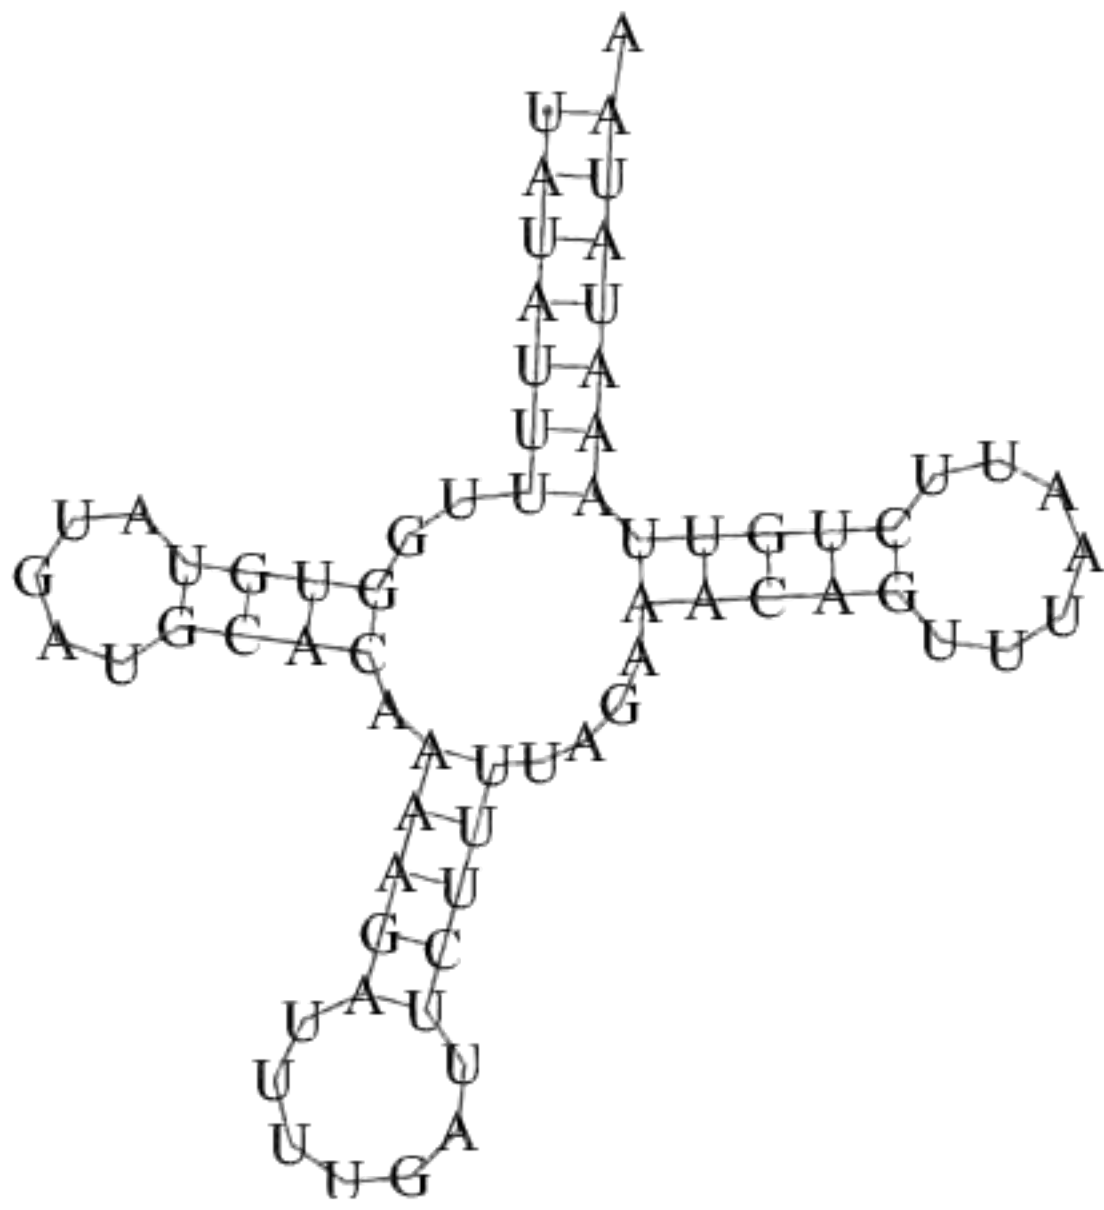

Glutamic acid(uug)

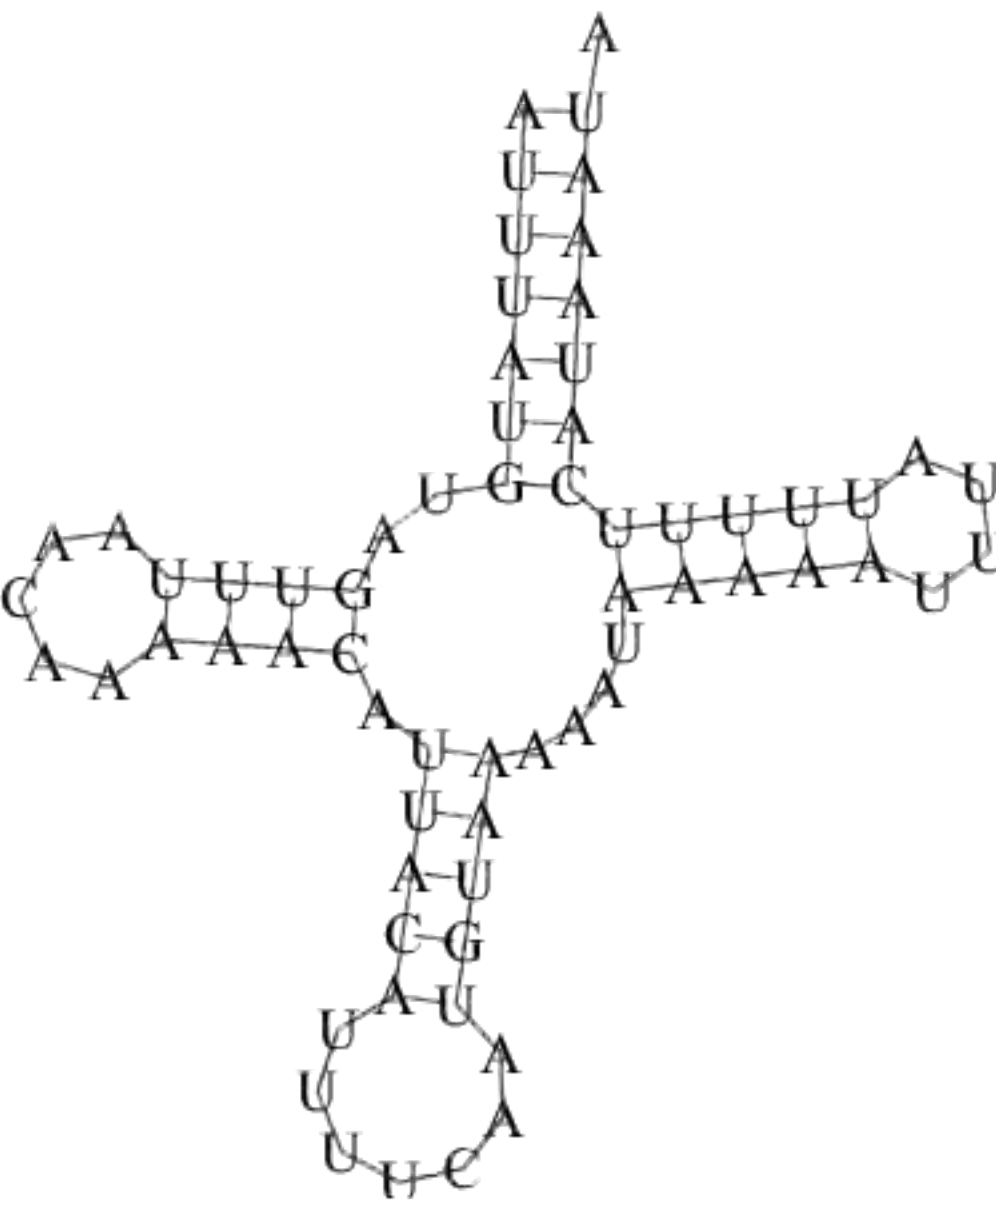

Glycine(ucc)

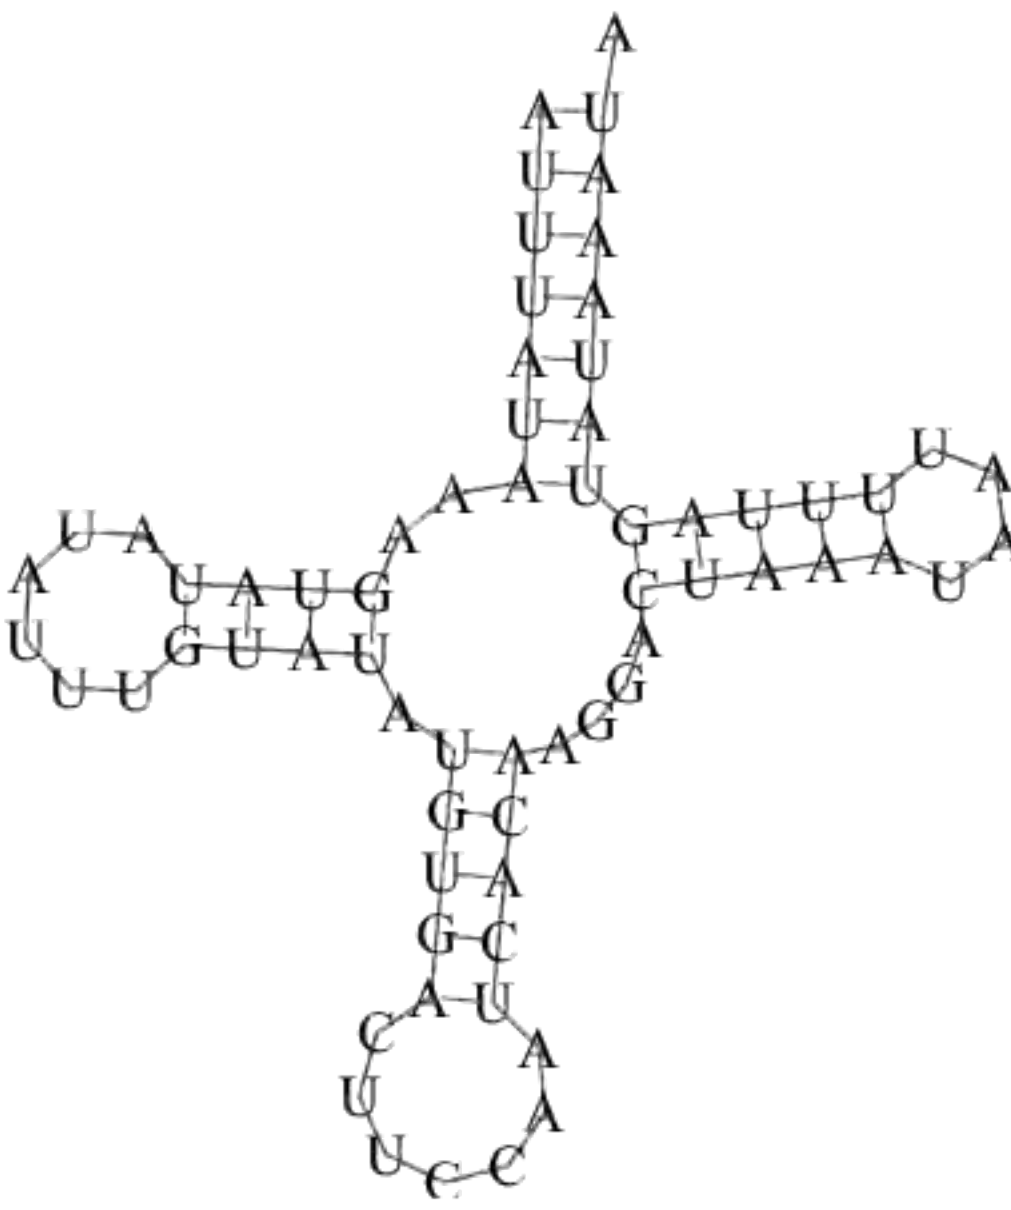

Histidine(gug)

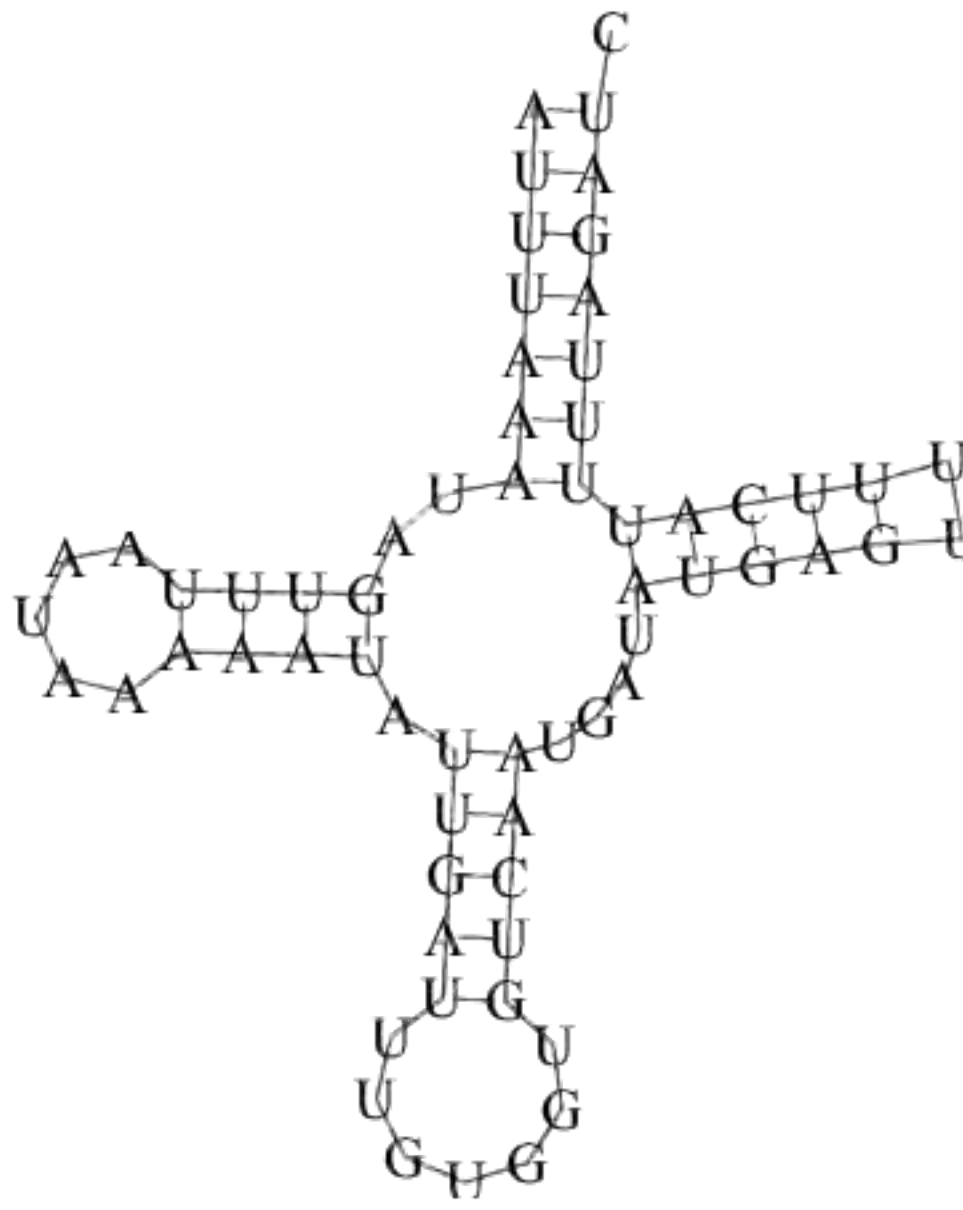

Isoleucine(gau)

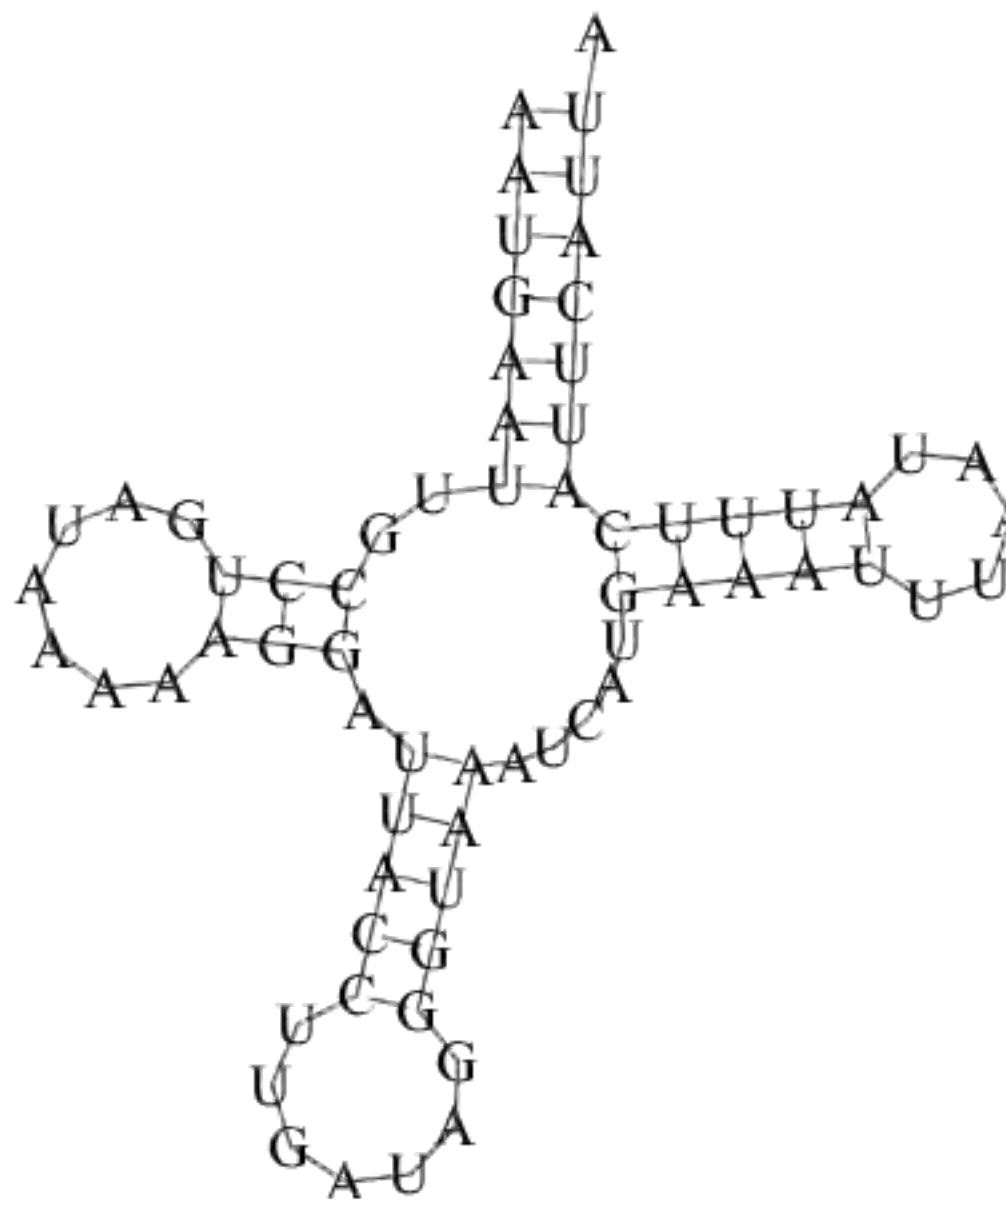

Leucine(uag)

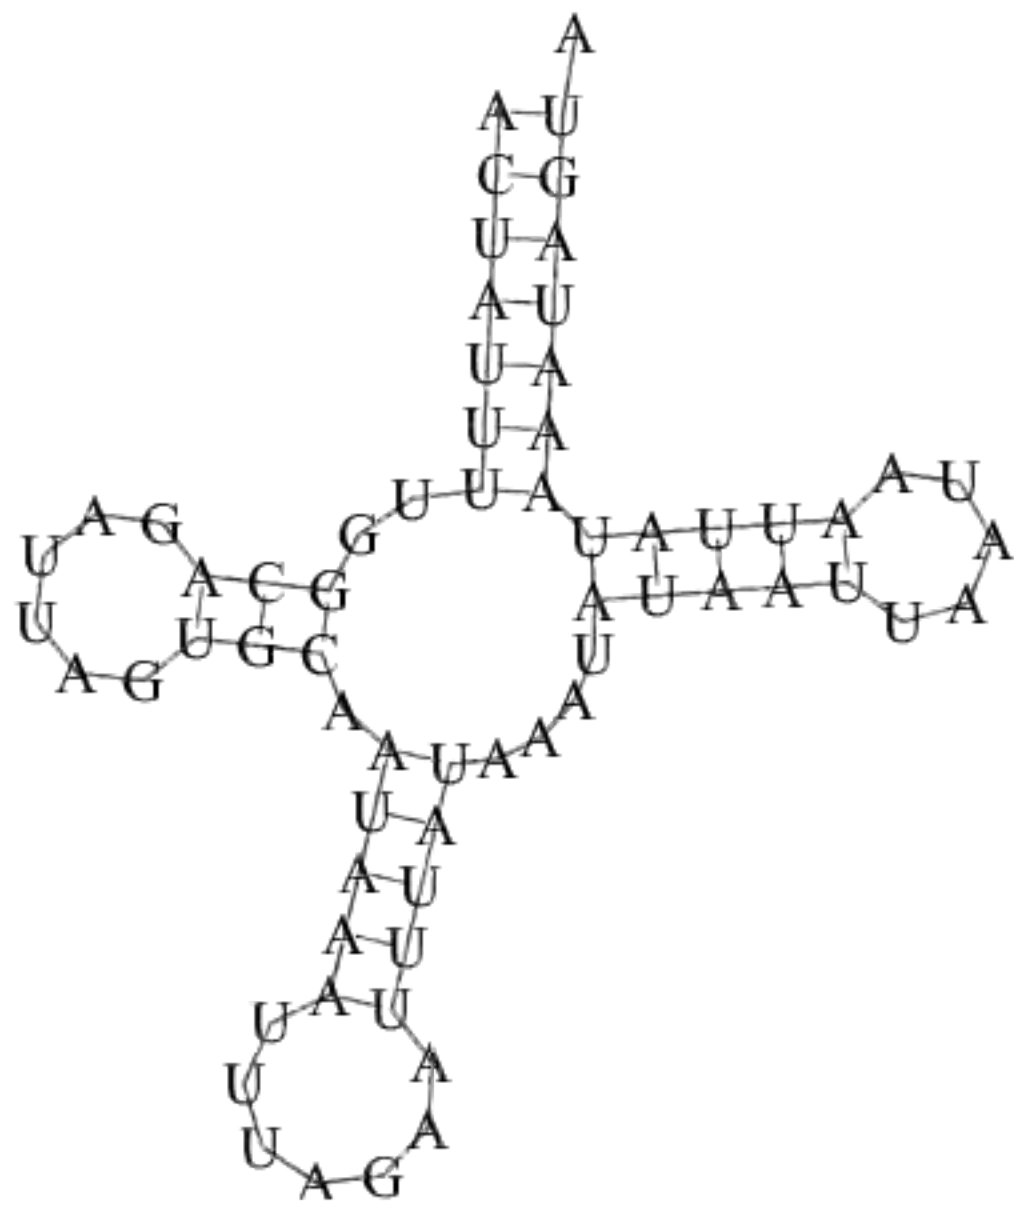

Leucine(uaa)

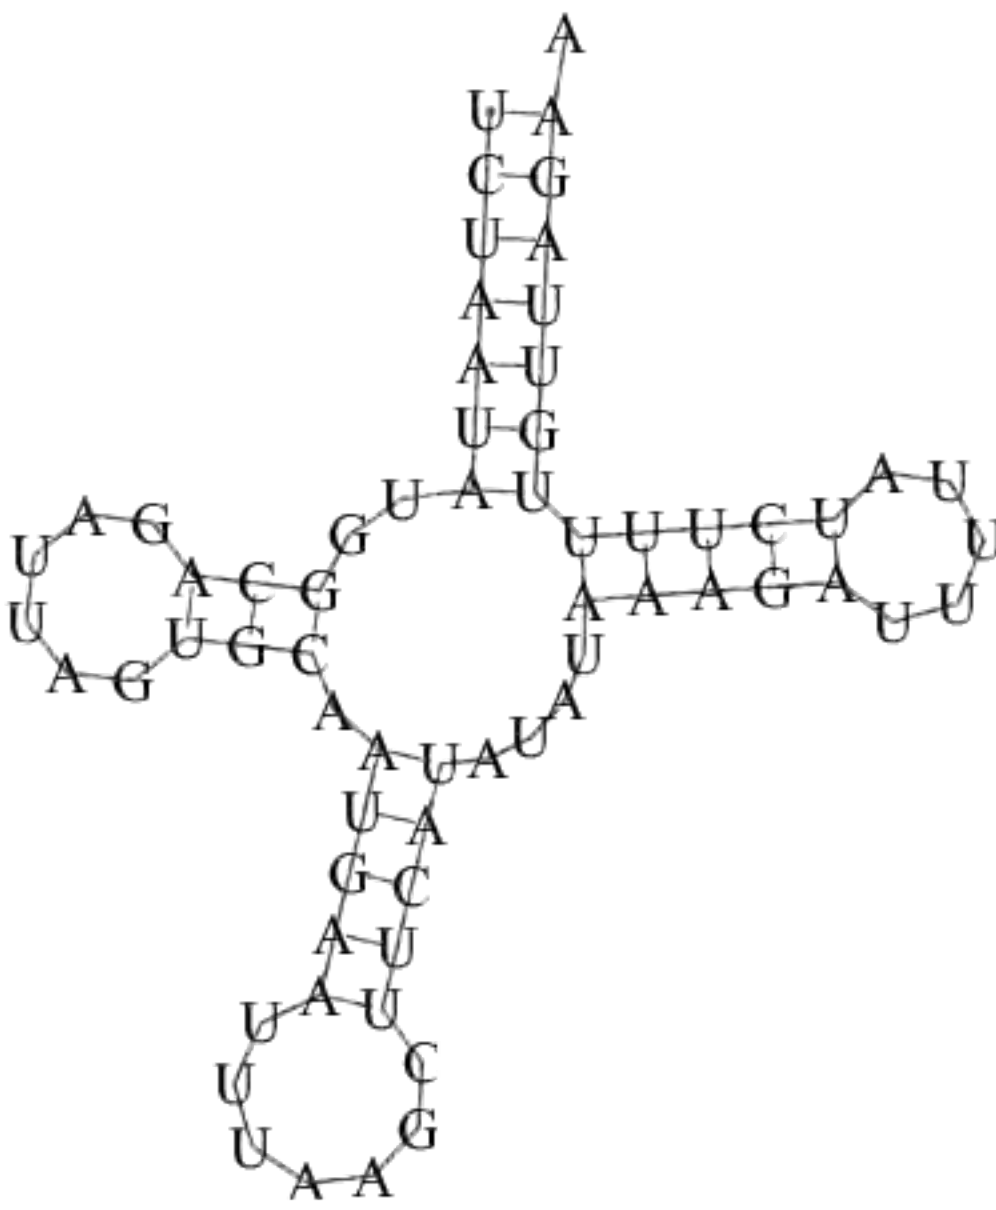

Lysine(cuu)

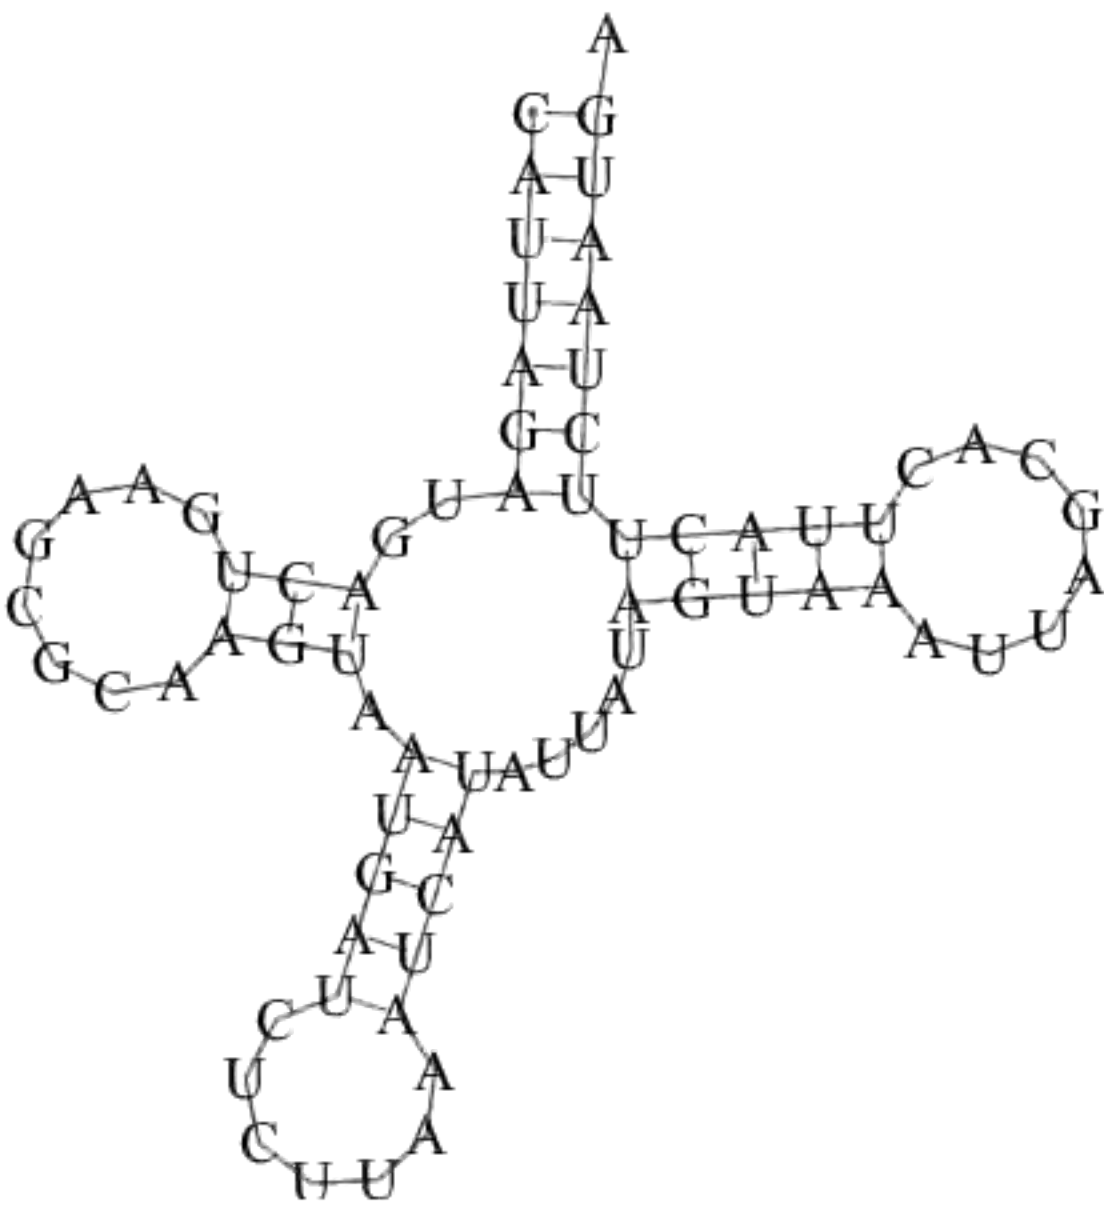

Methionine(cau)

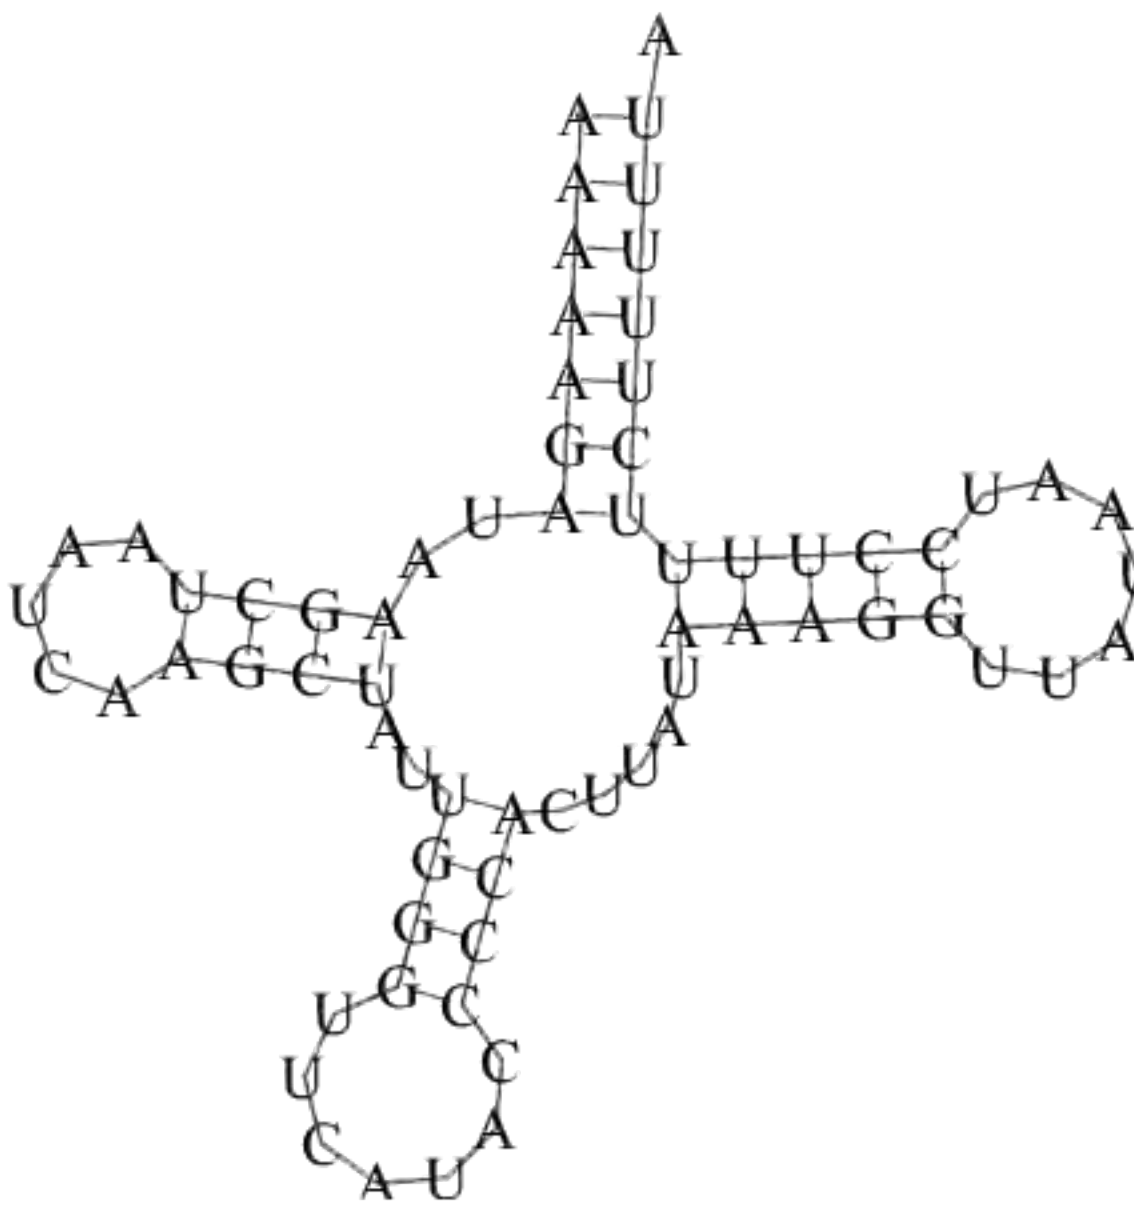

Phenylalanine(gaa)

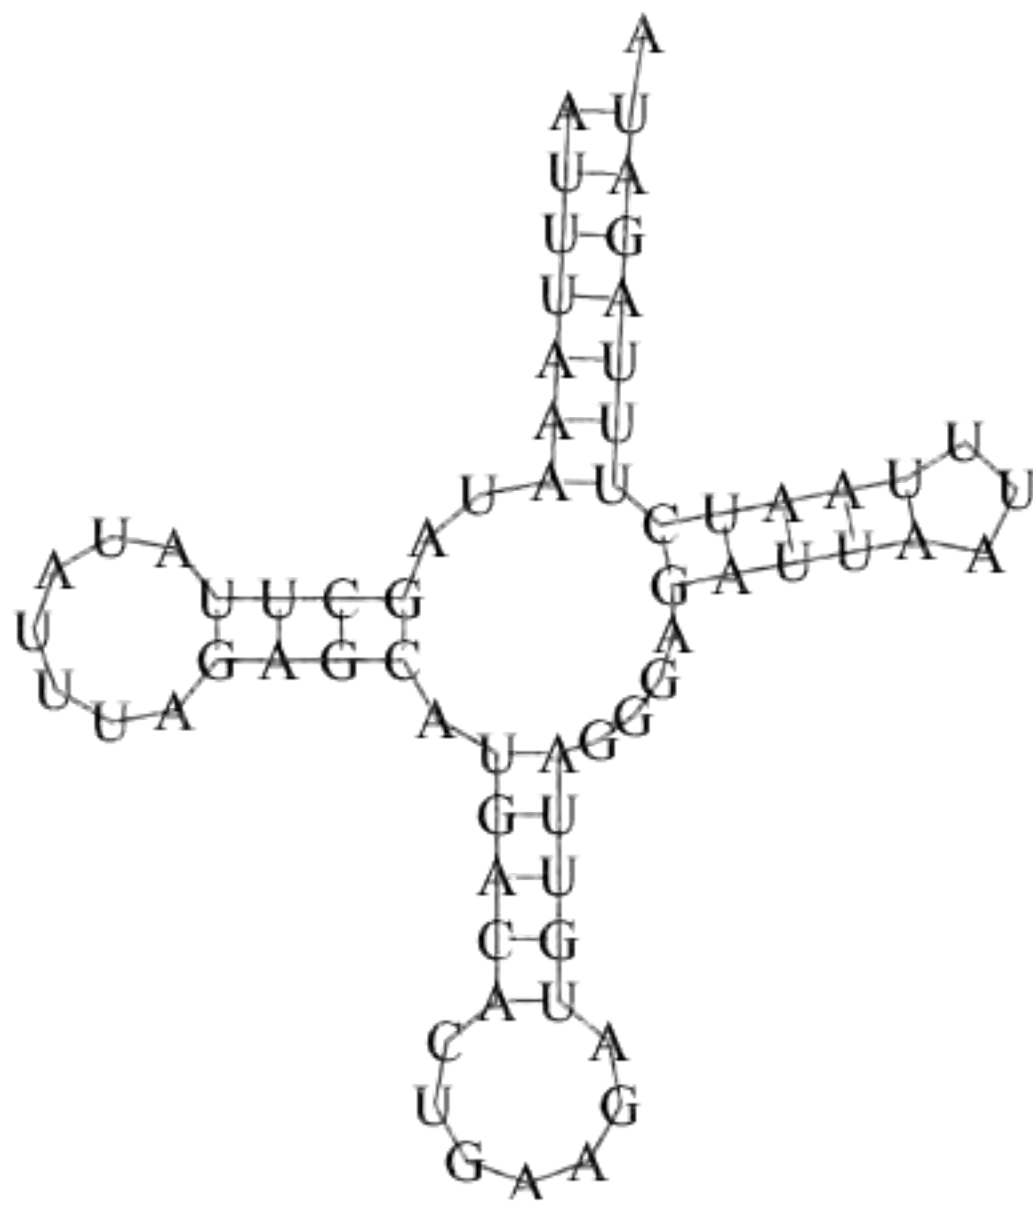

Proline(ugg)

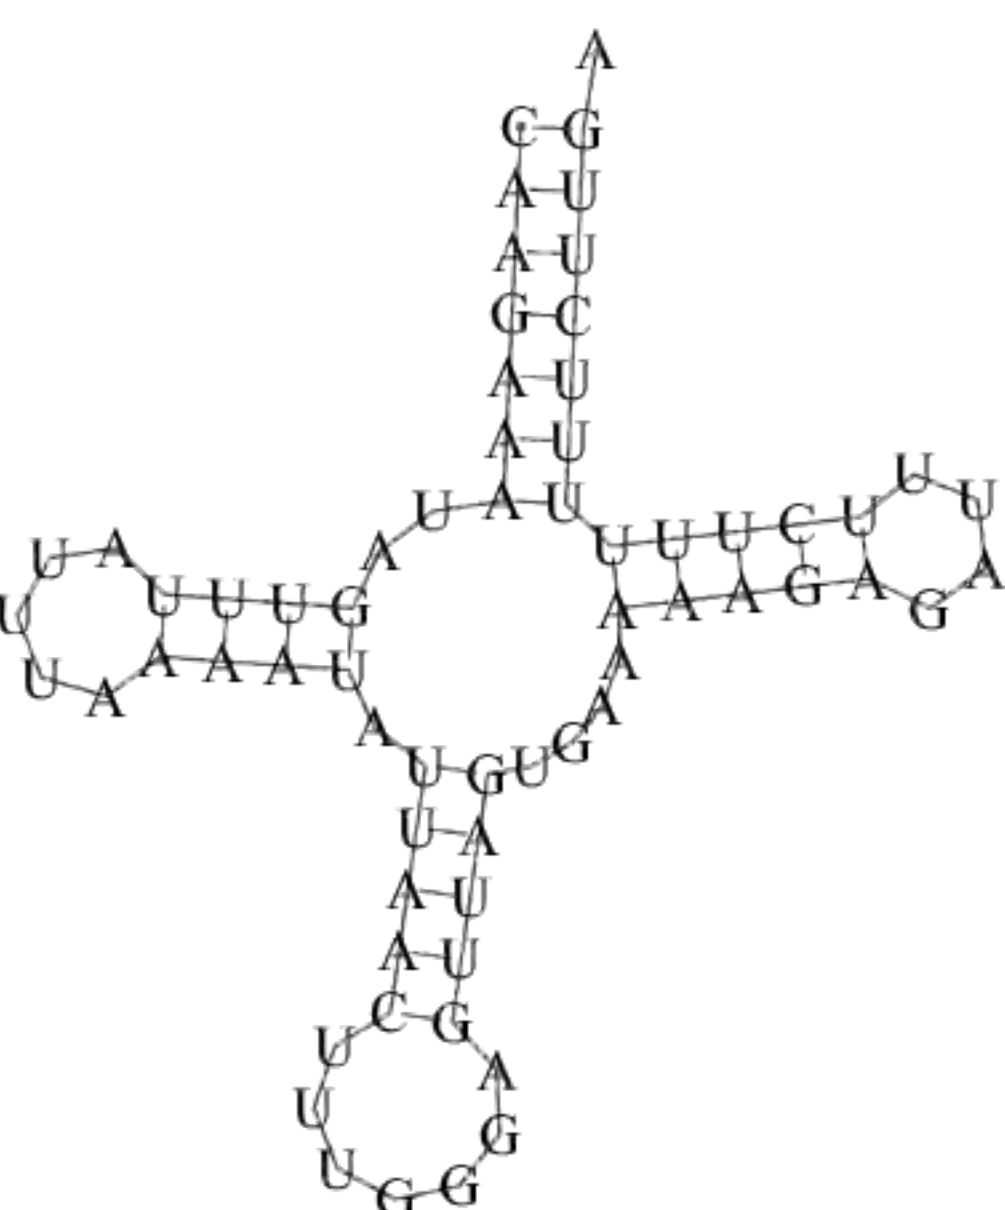

Serine(gcu)

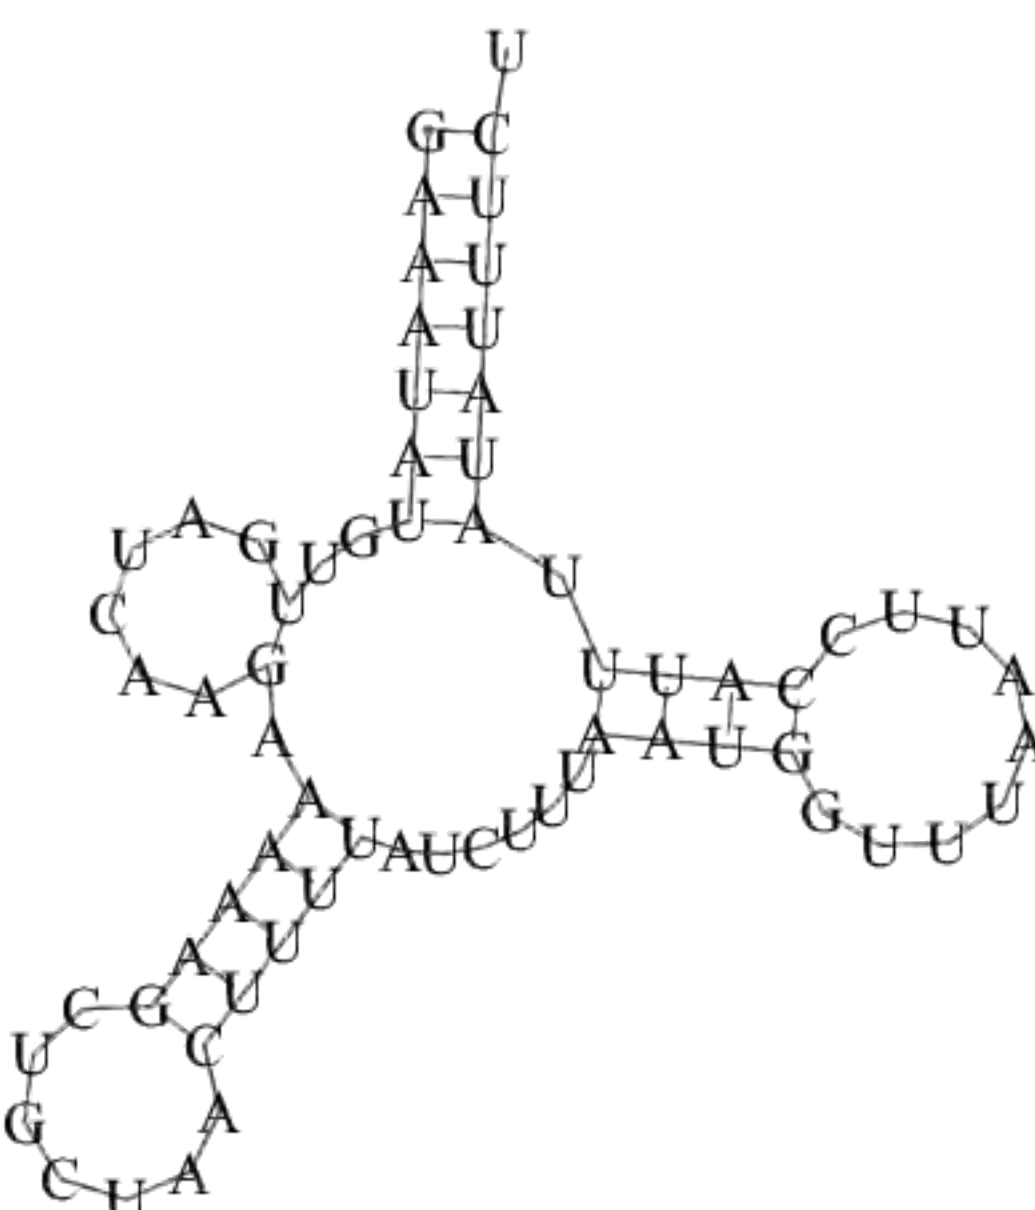

Serine(uga)

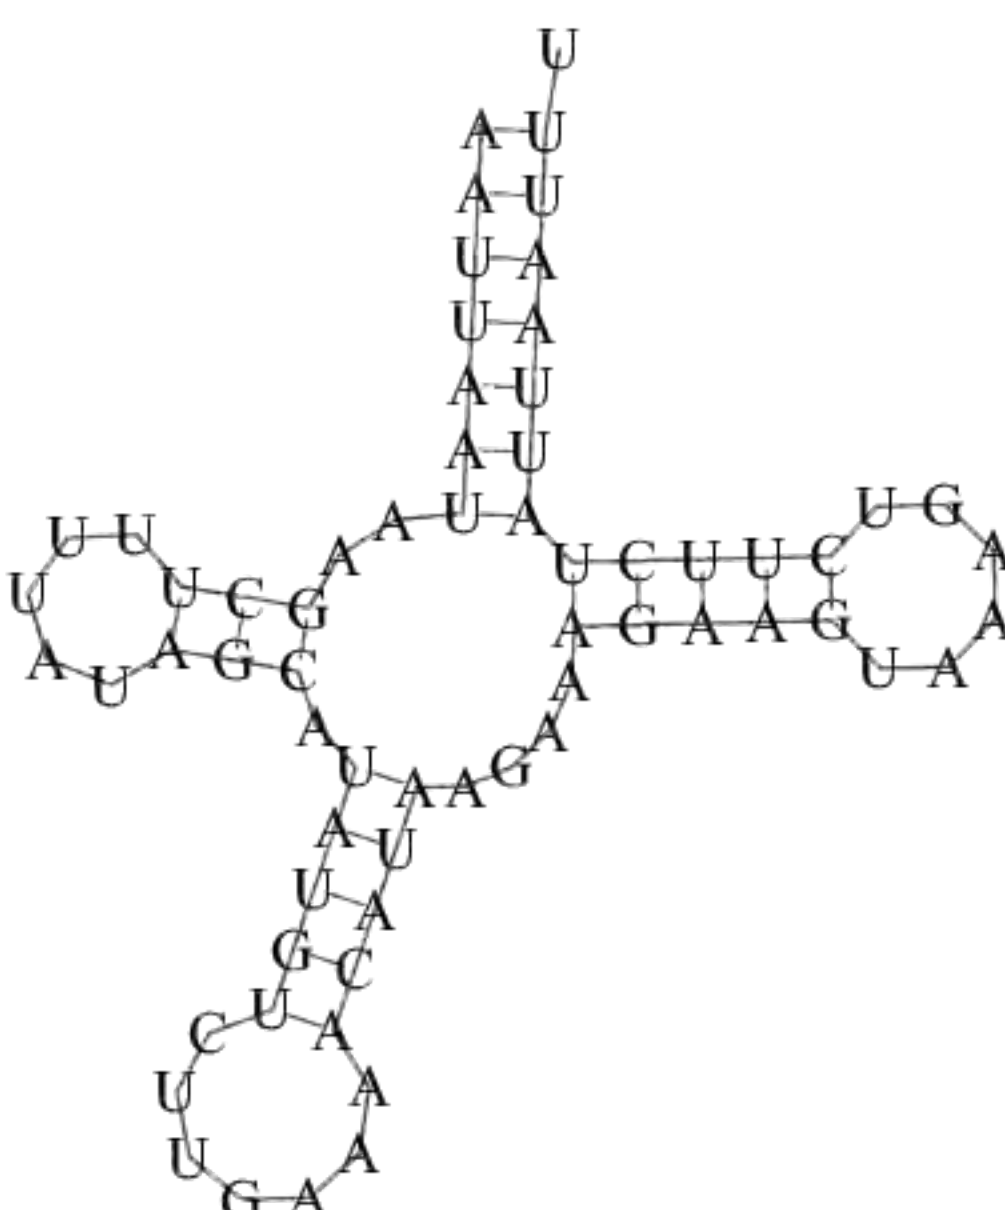

Threonine(ugu)

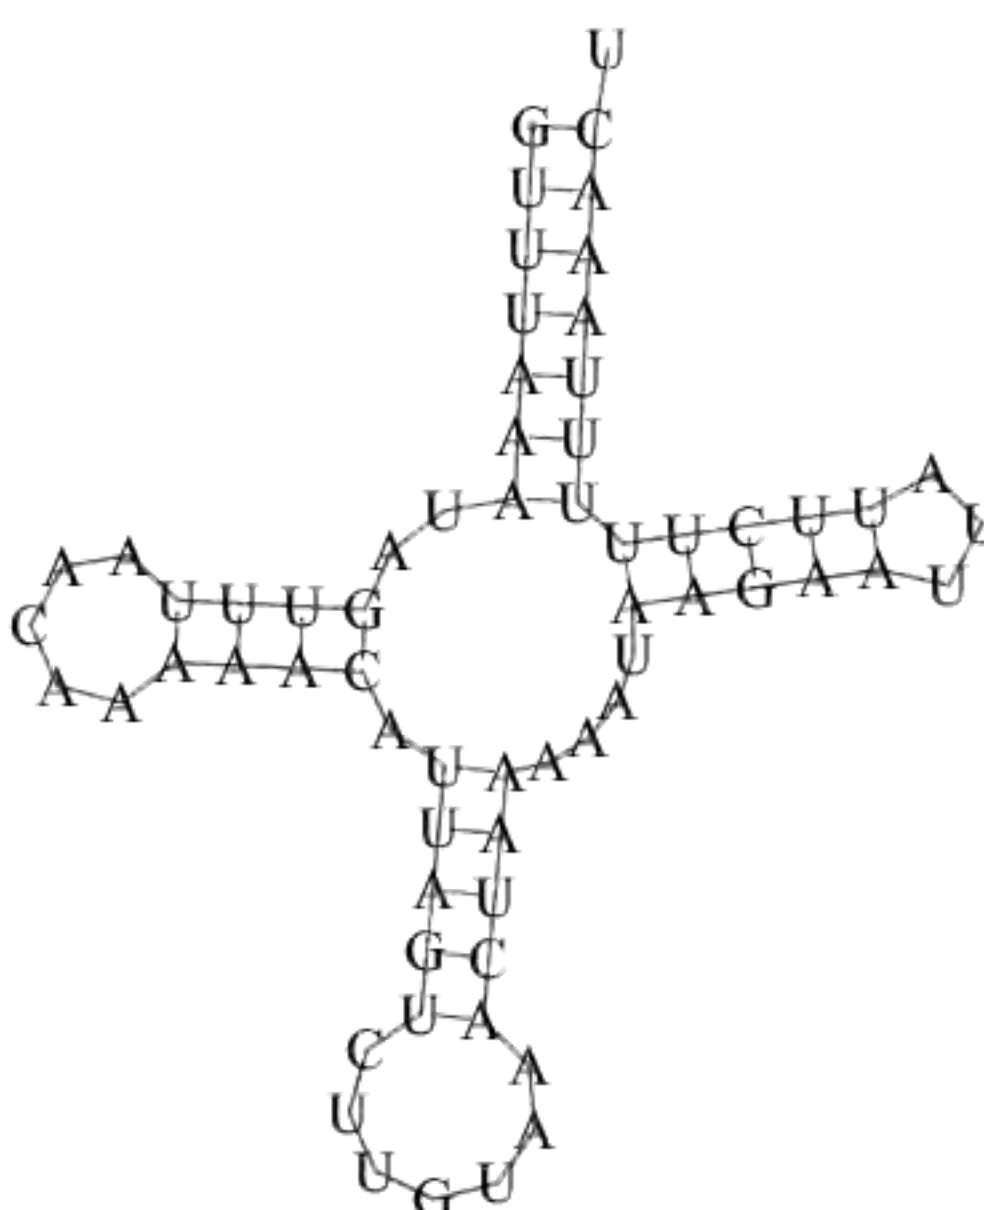

Tryptophan(uca)

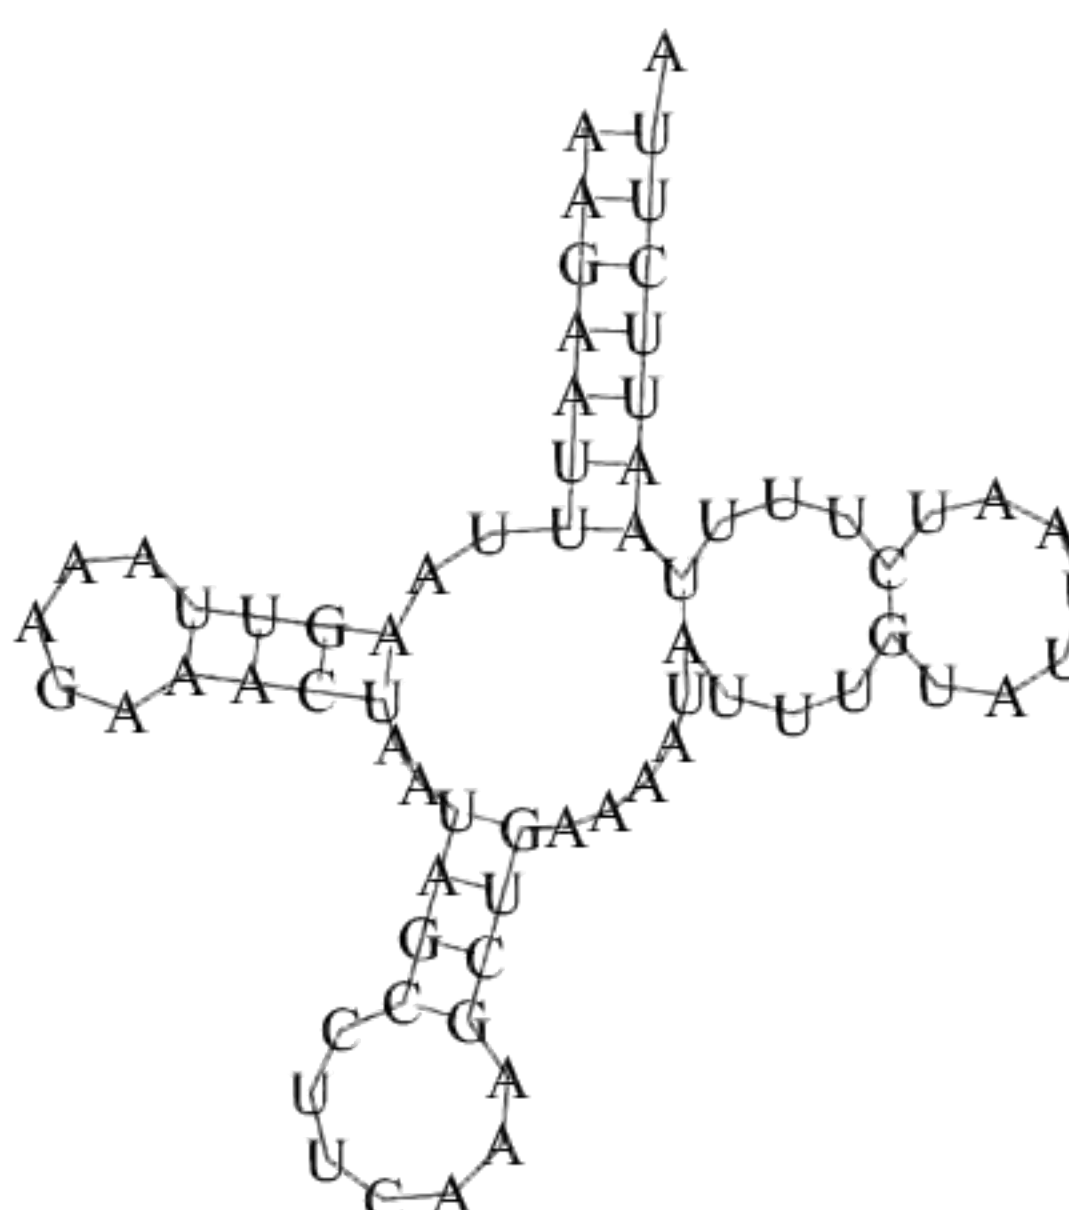

Tyrosine(gua)

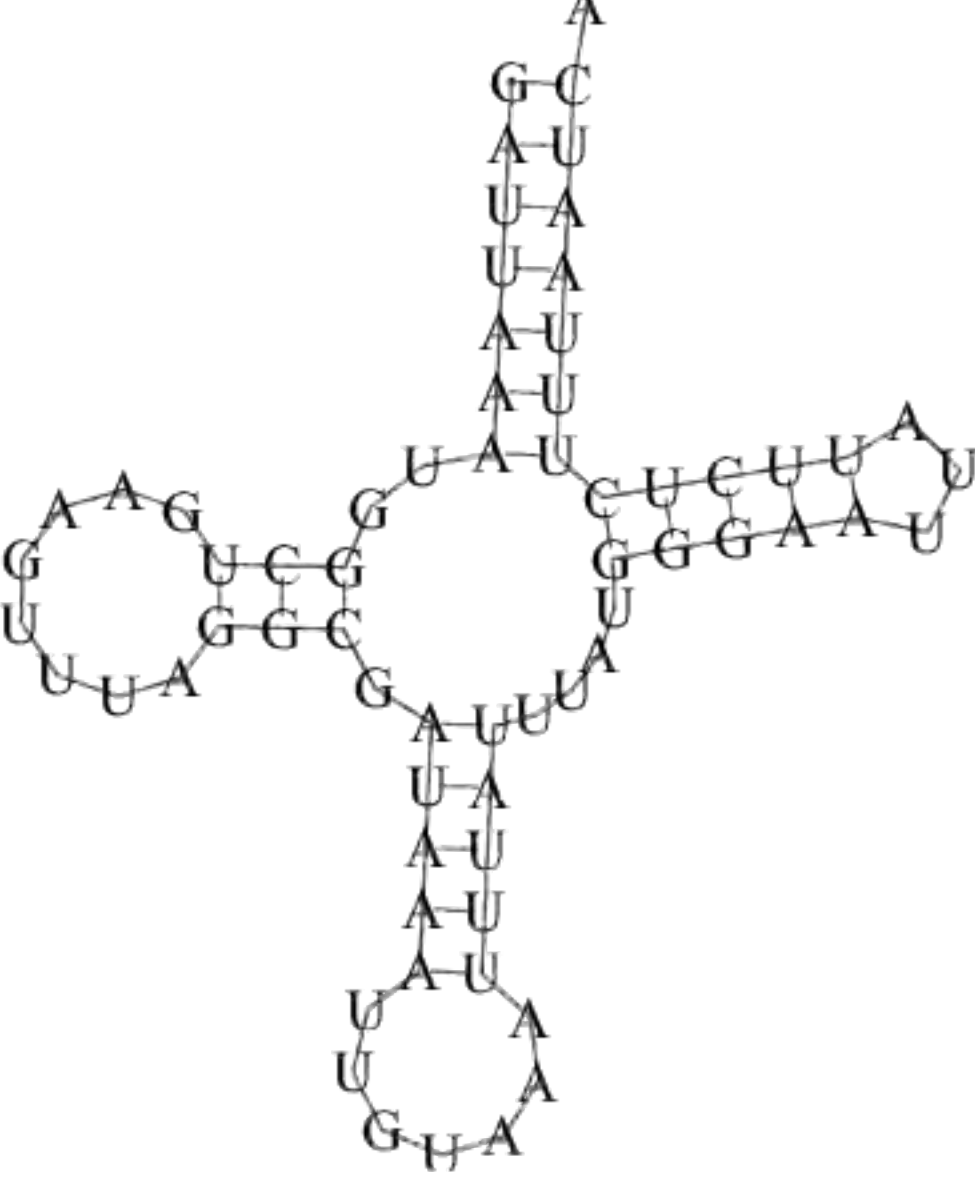

Valine(uac)

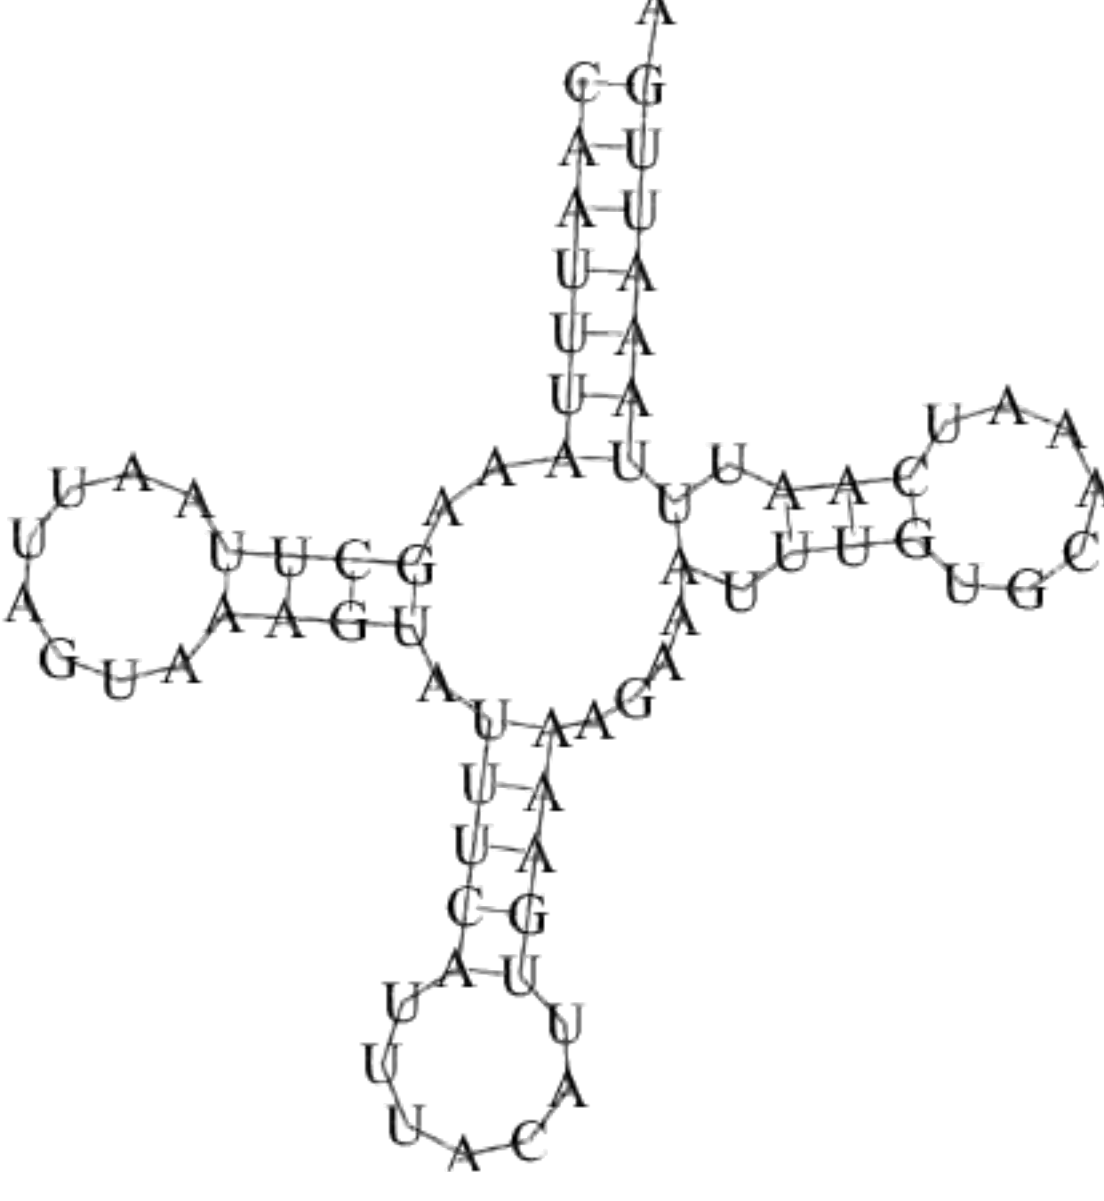



An. kunmingensis

Alanine(ugc)

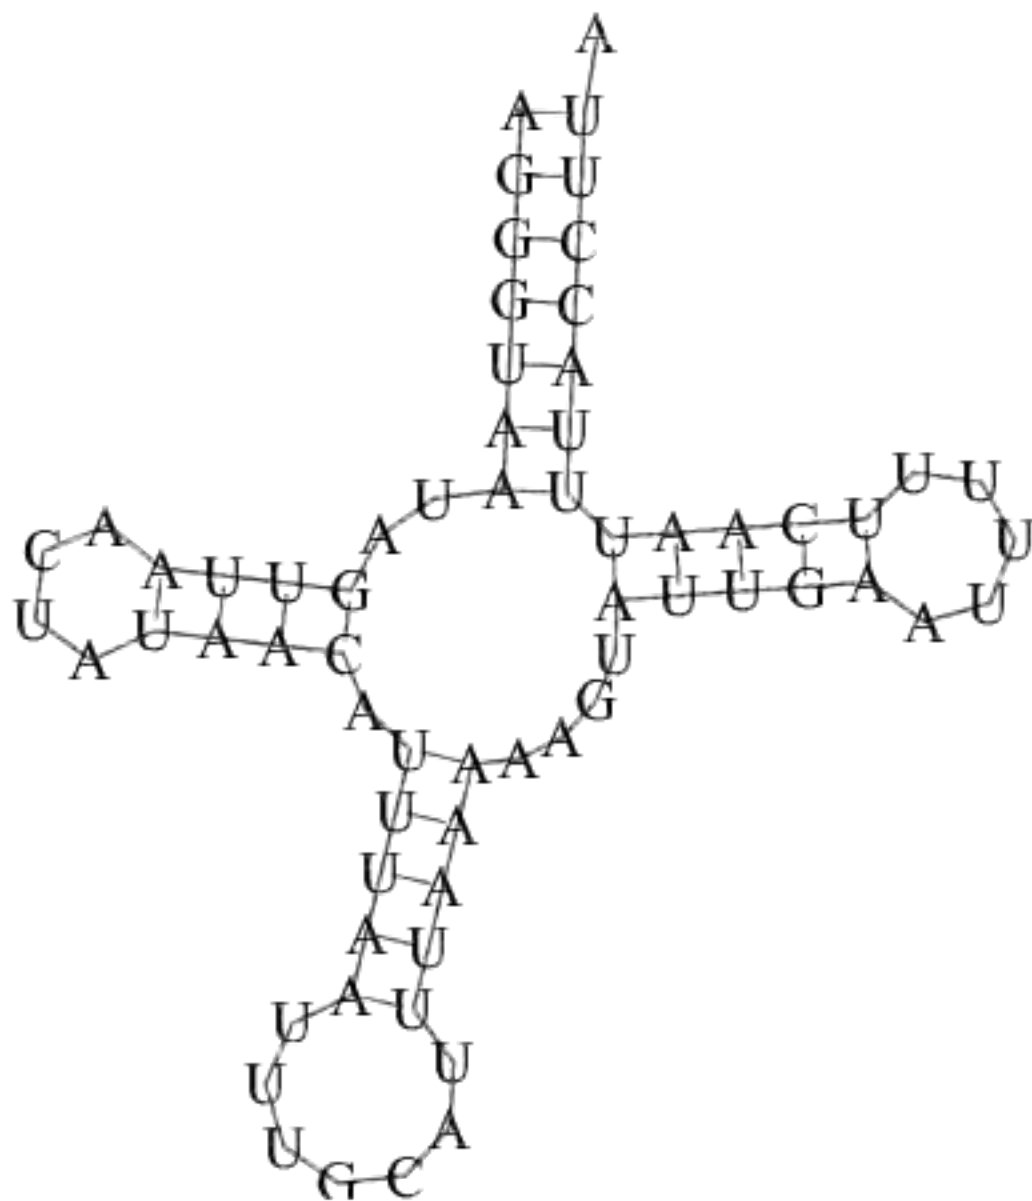

Arginine(ucg)

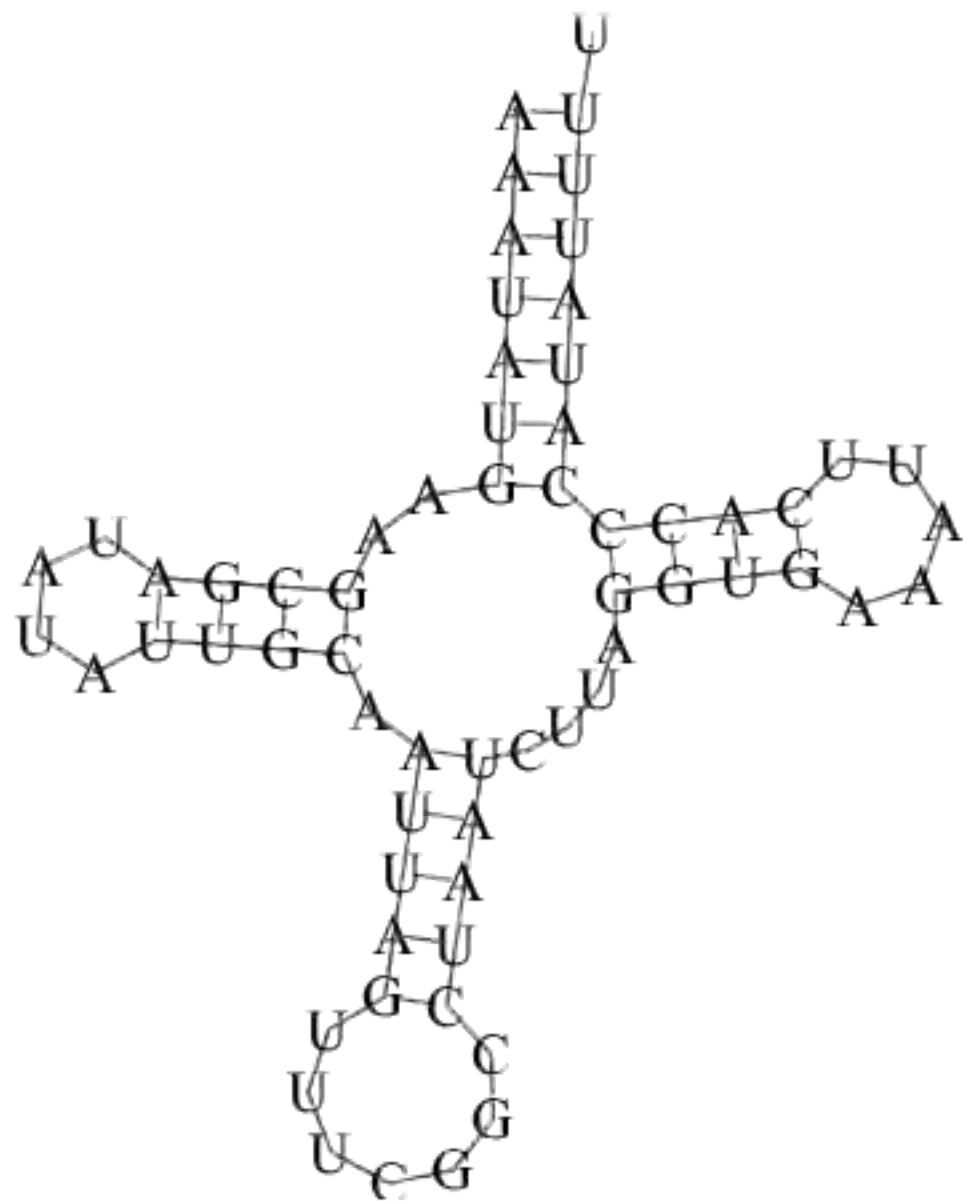

Asparagine(guu)

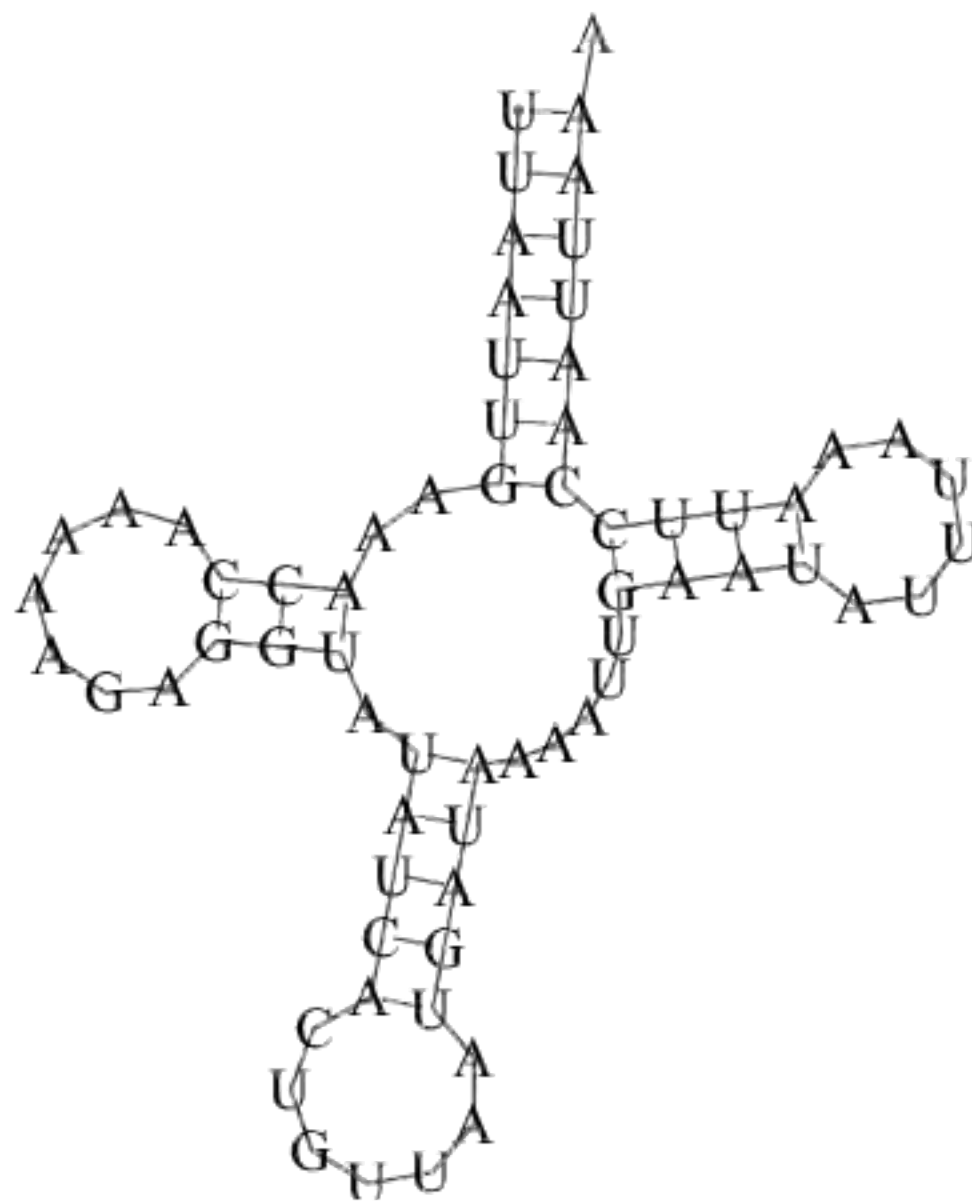

Aspartic acid(guc)

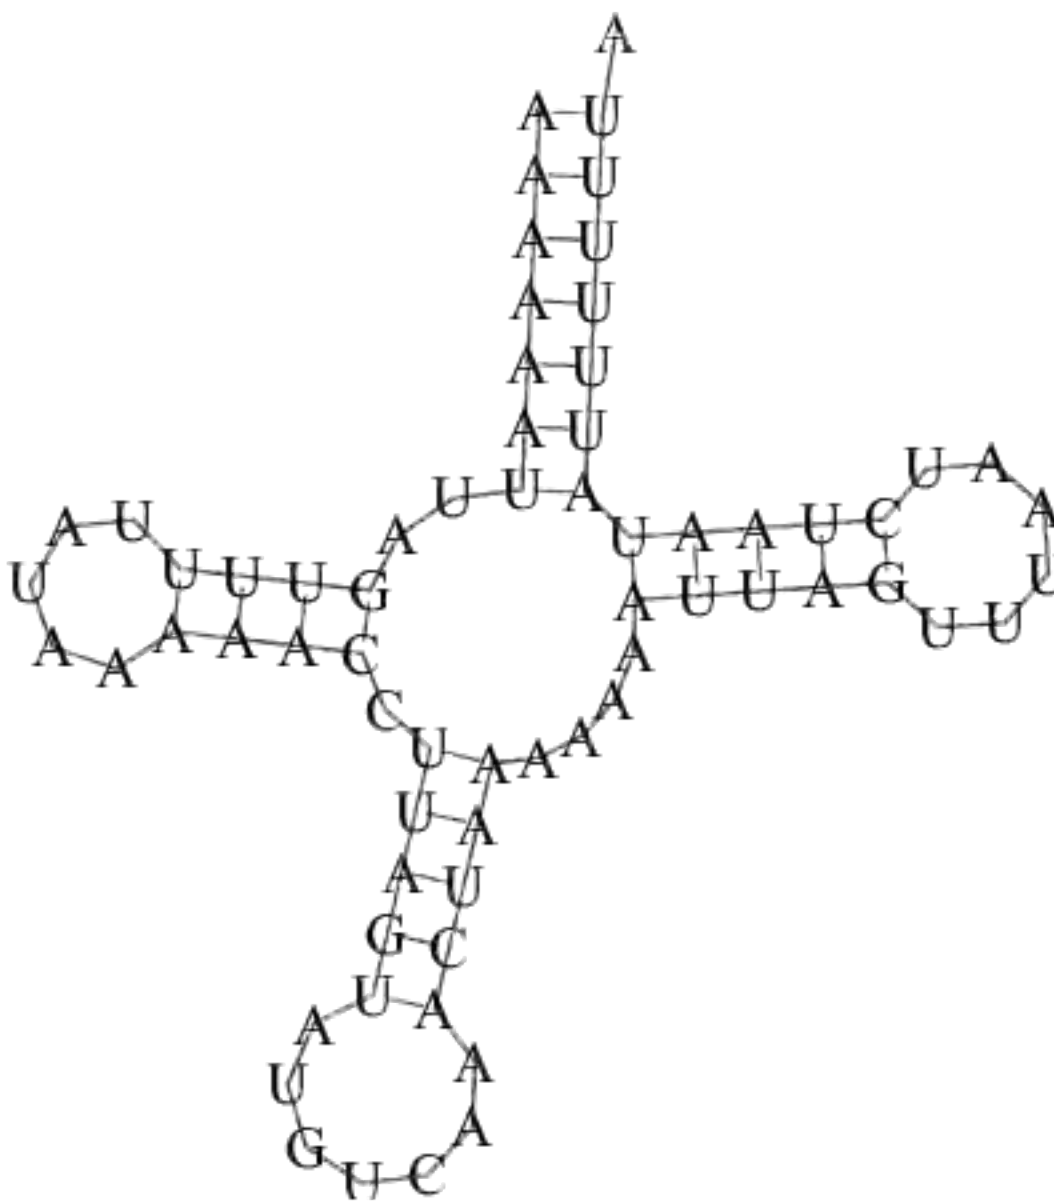

Cysteine(gca)

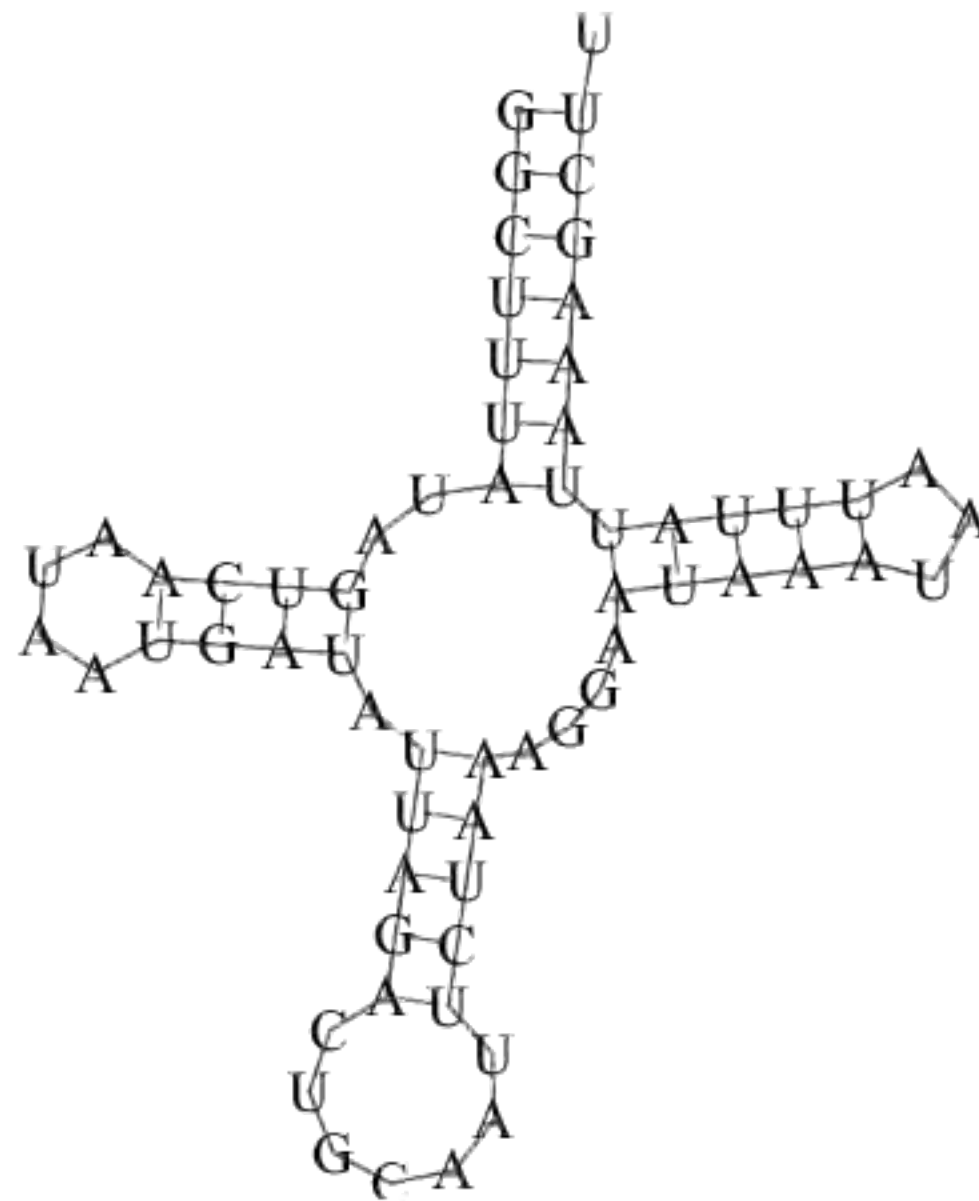

Glutamine(uuc)

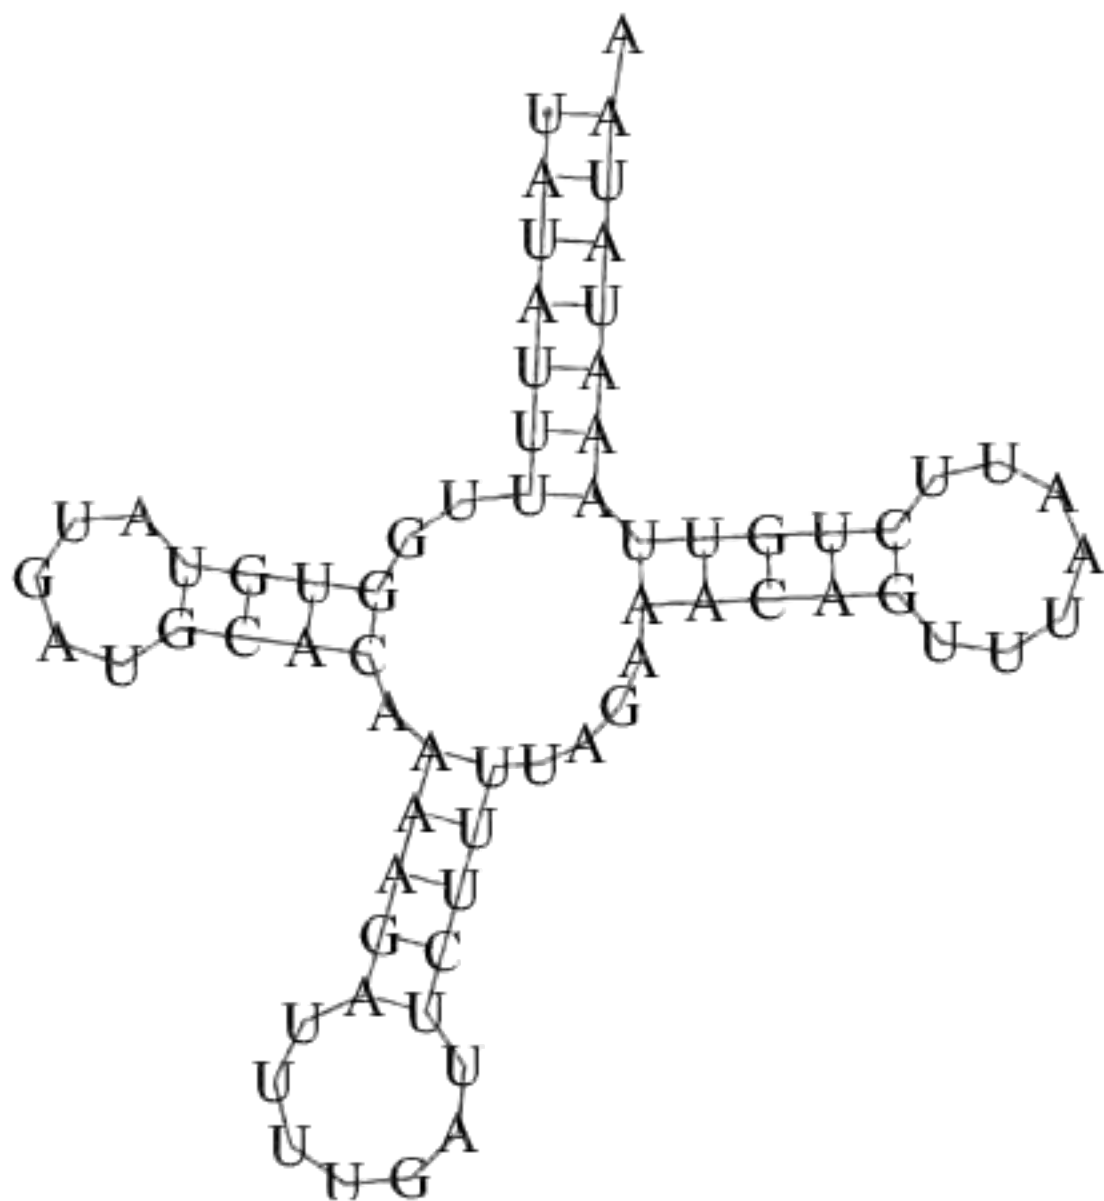

Glutamic acid(uug)

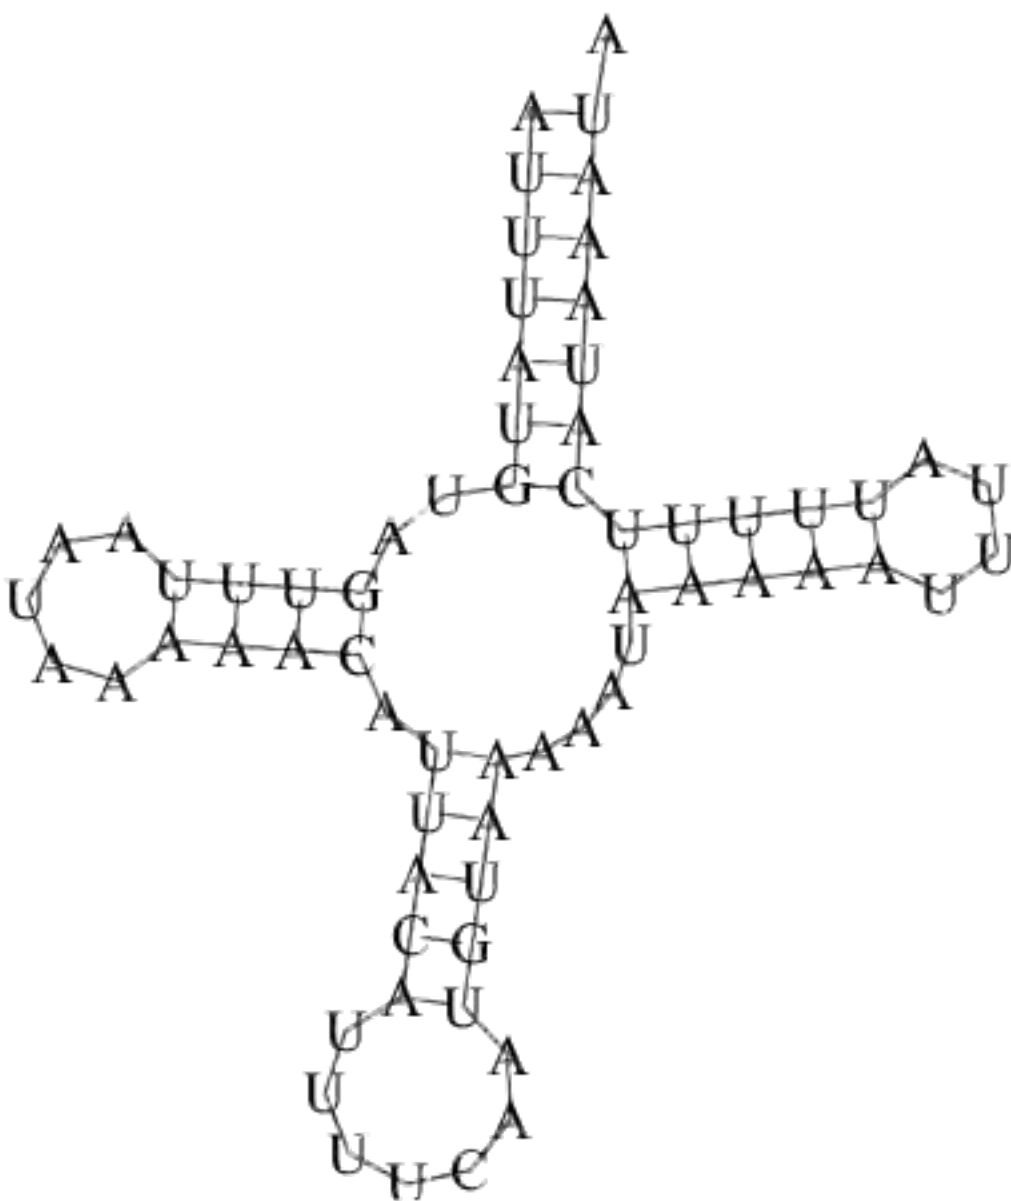

Glycine(ucc)

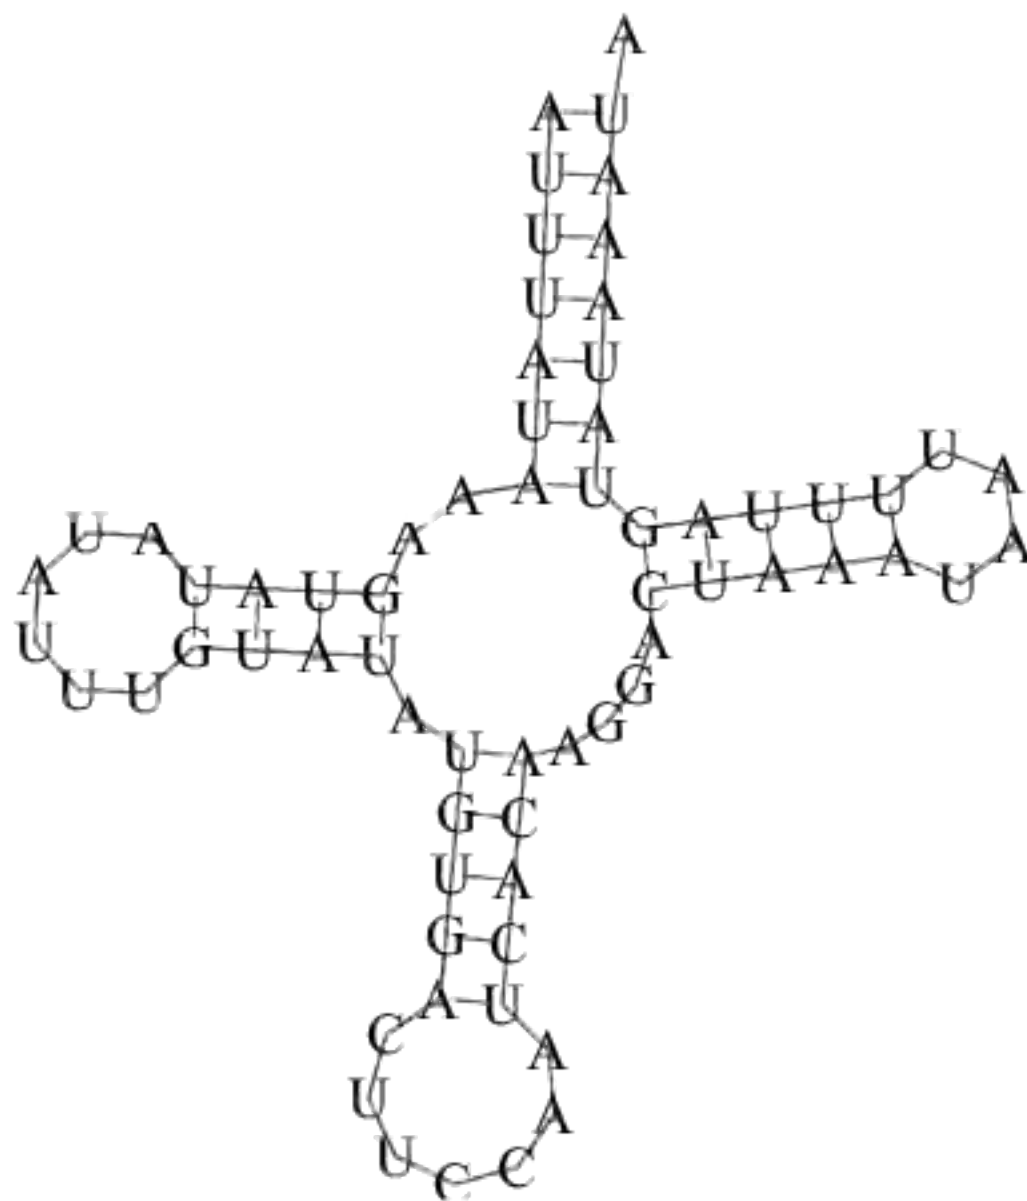

Histidine(gug)

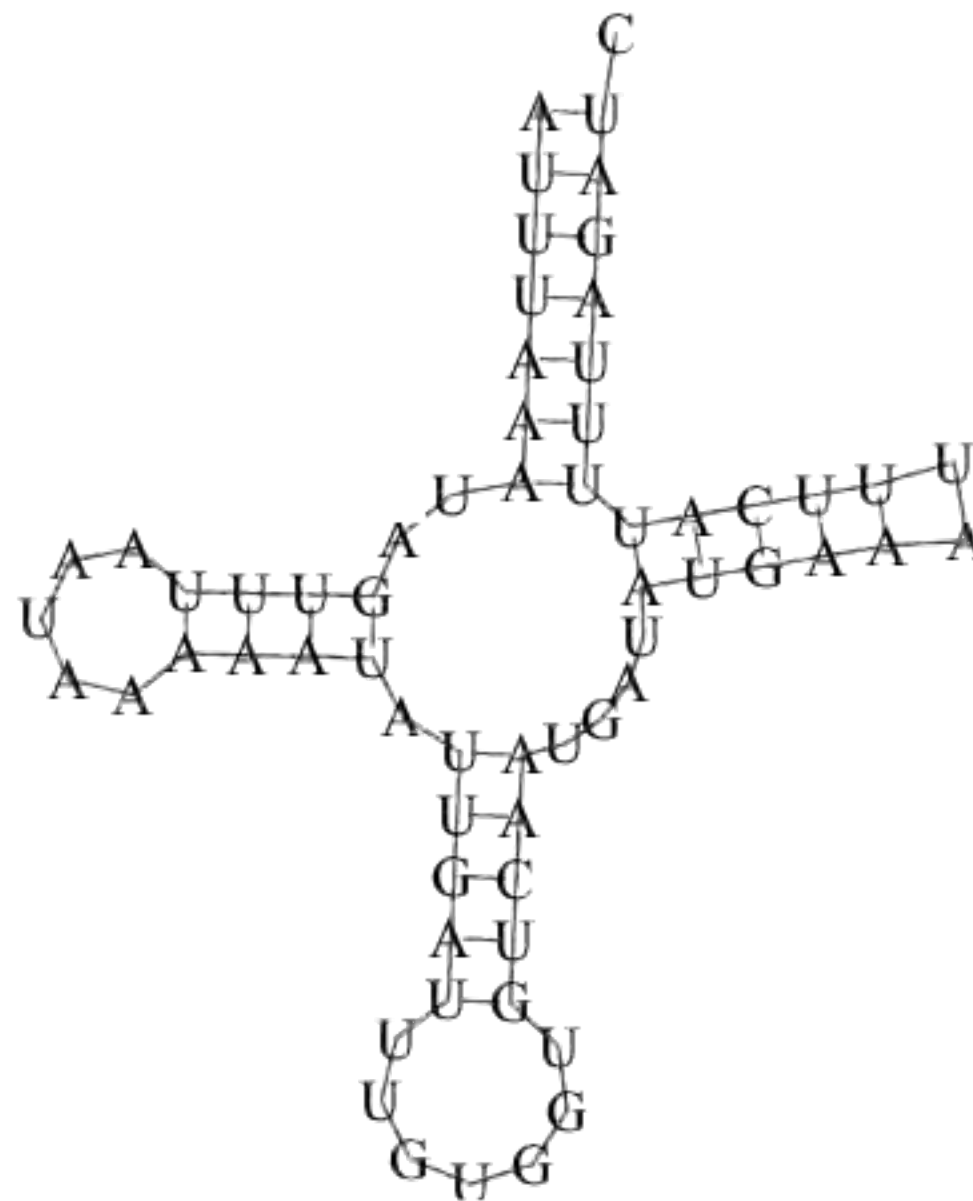

Isoleucine(gau)

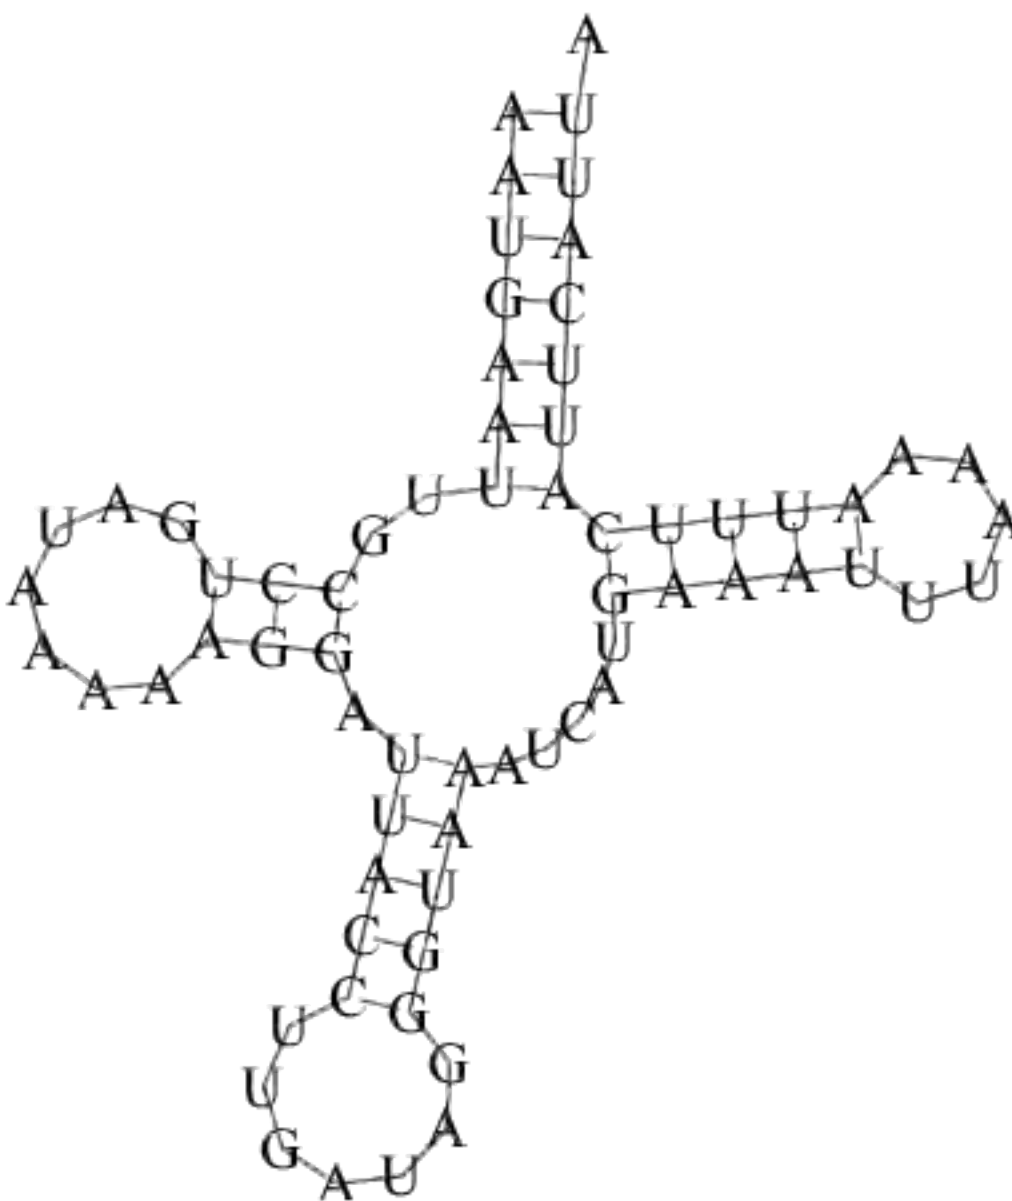

Leucine(uag)

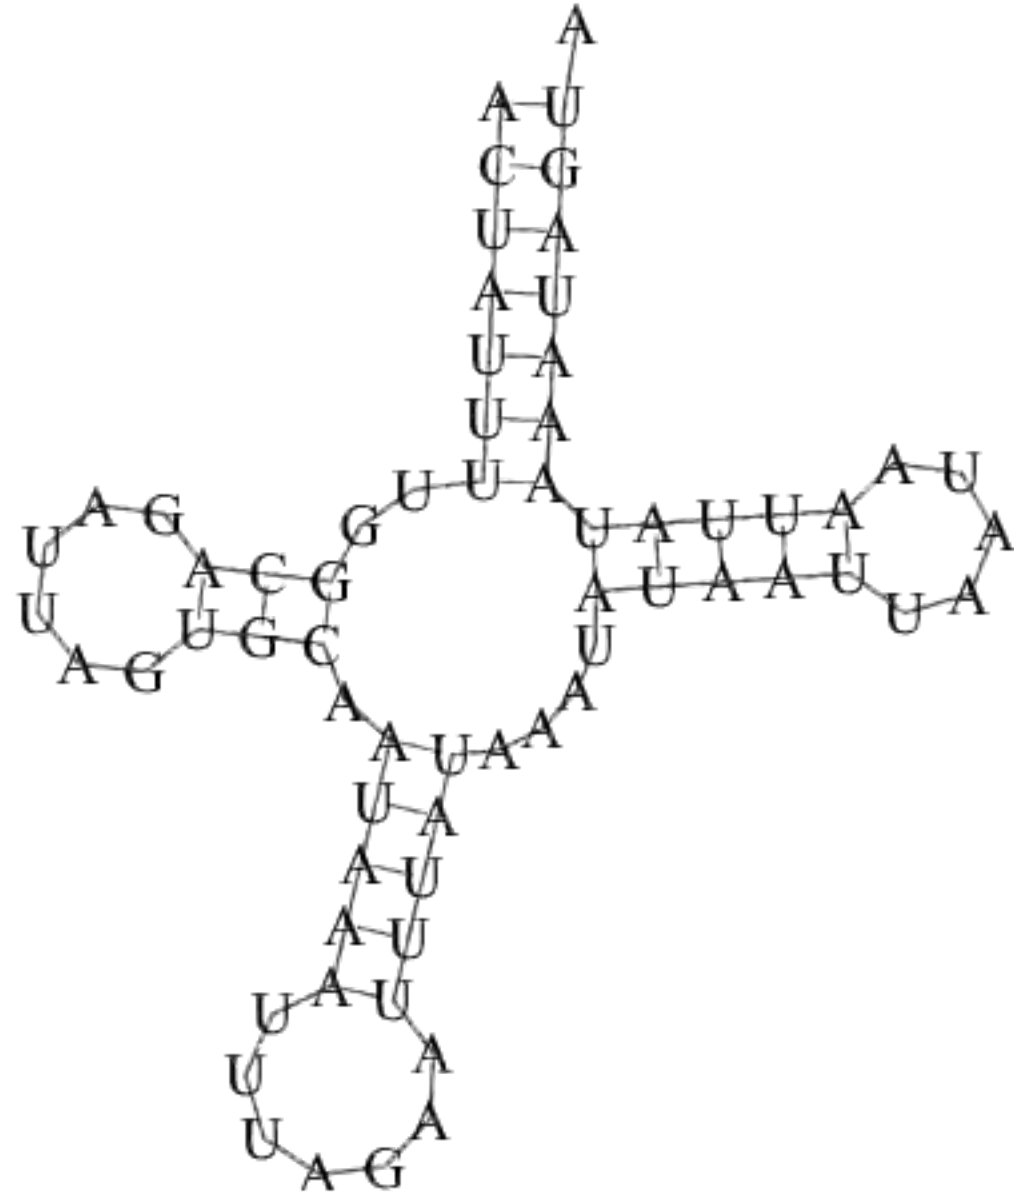

Leucine(uaa)

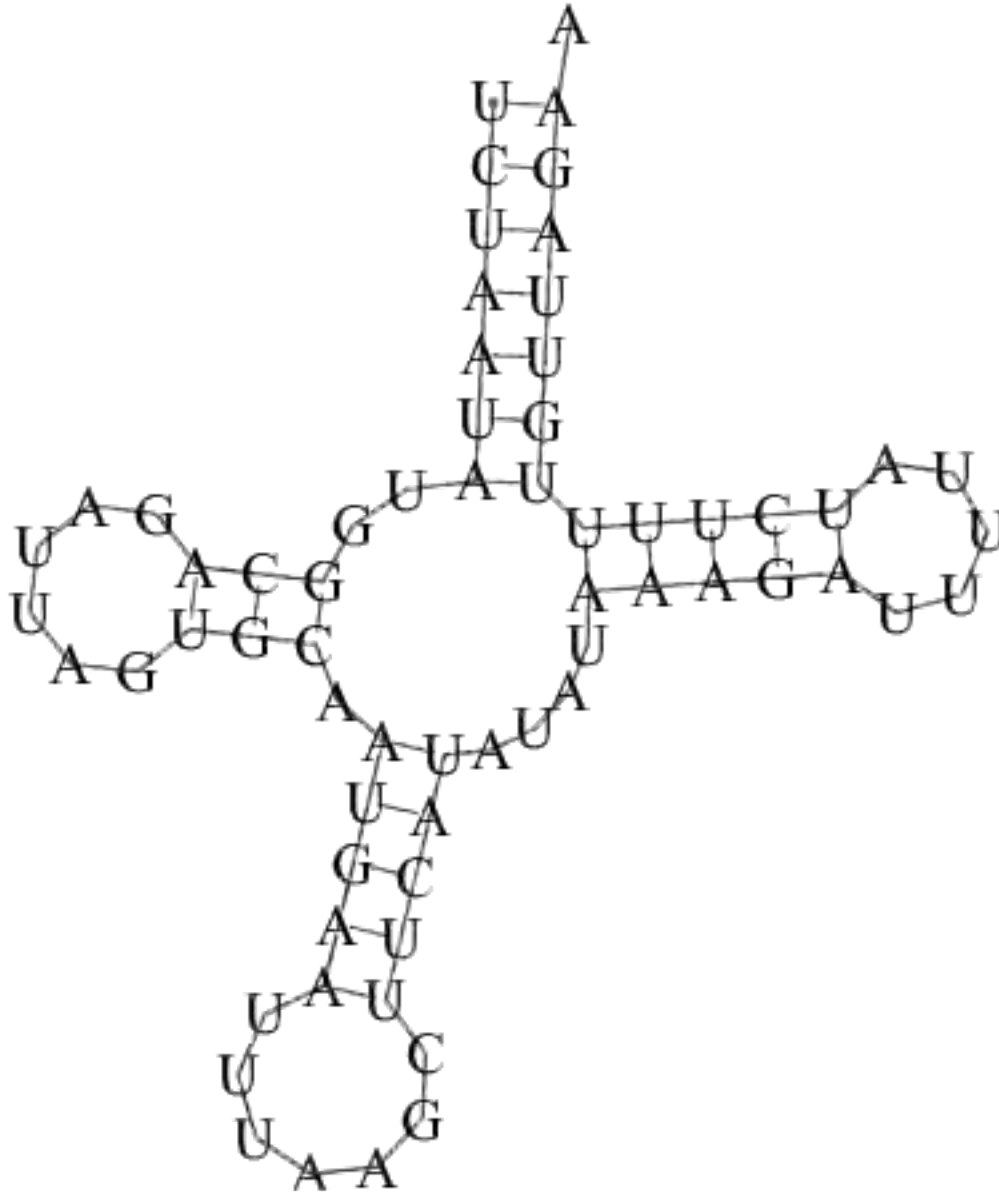

Lysine(cuu)

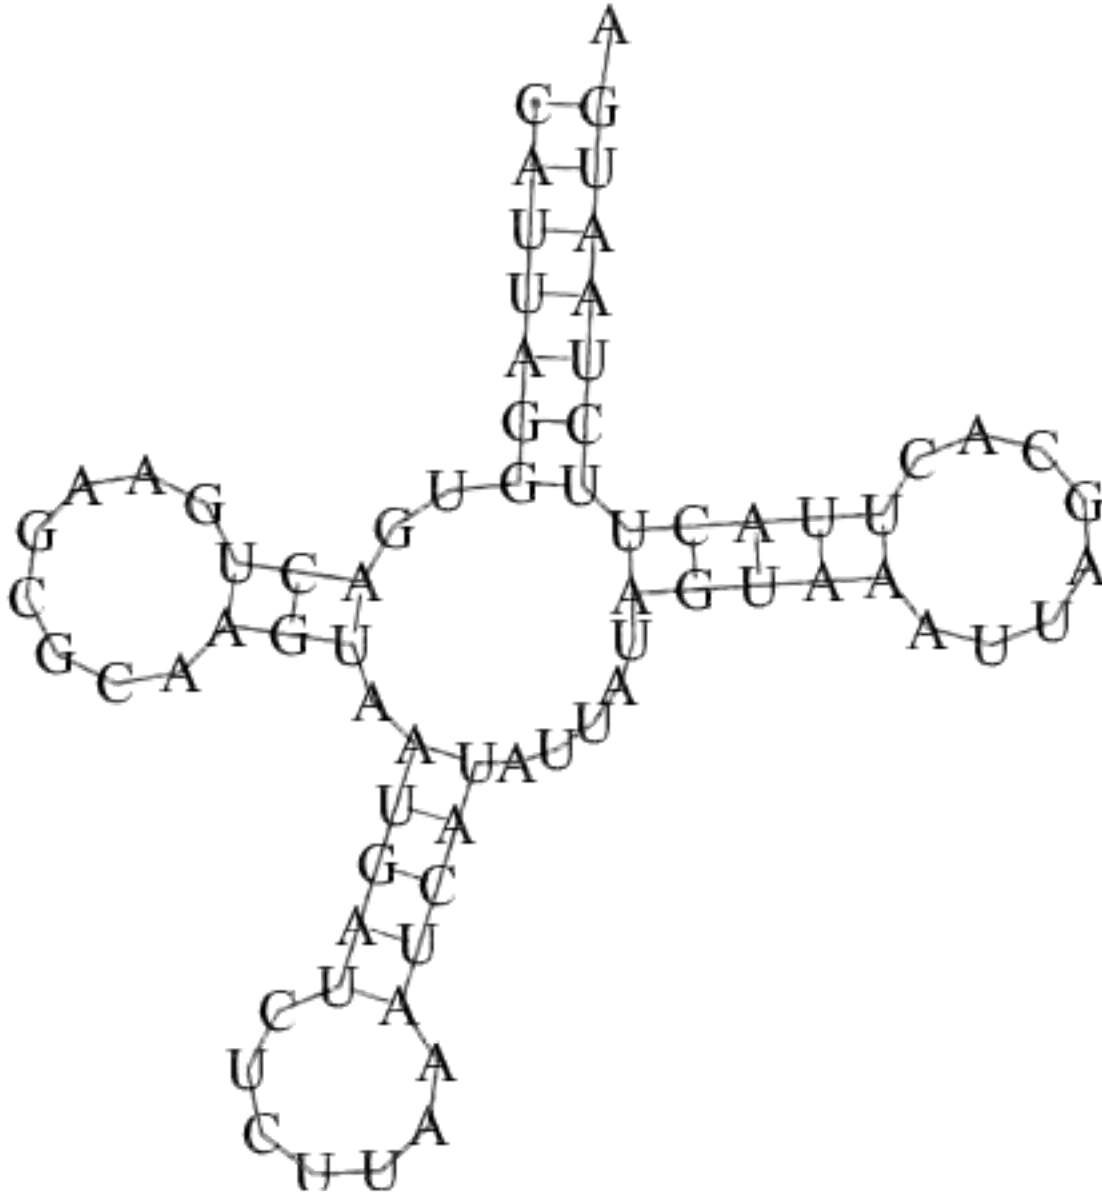

Methionine(cau)

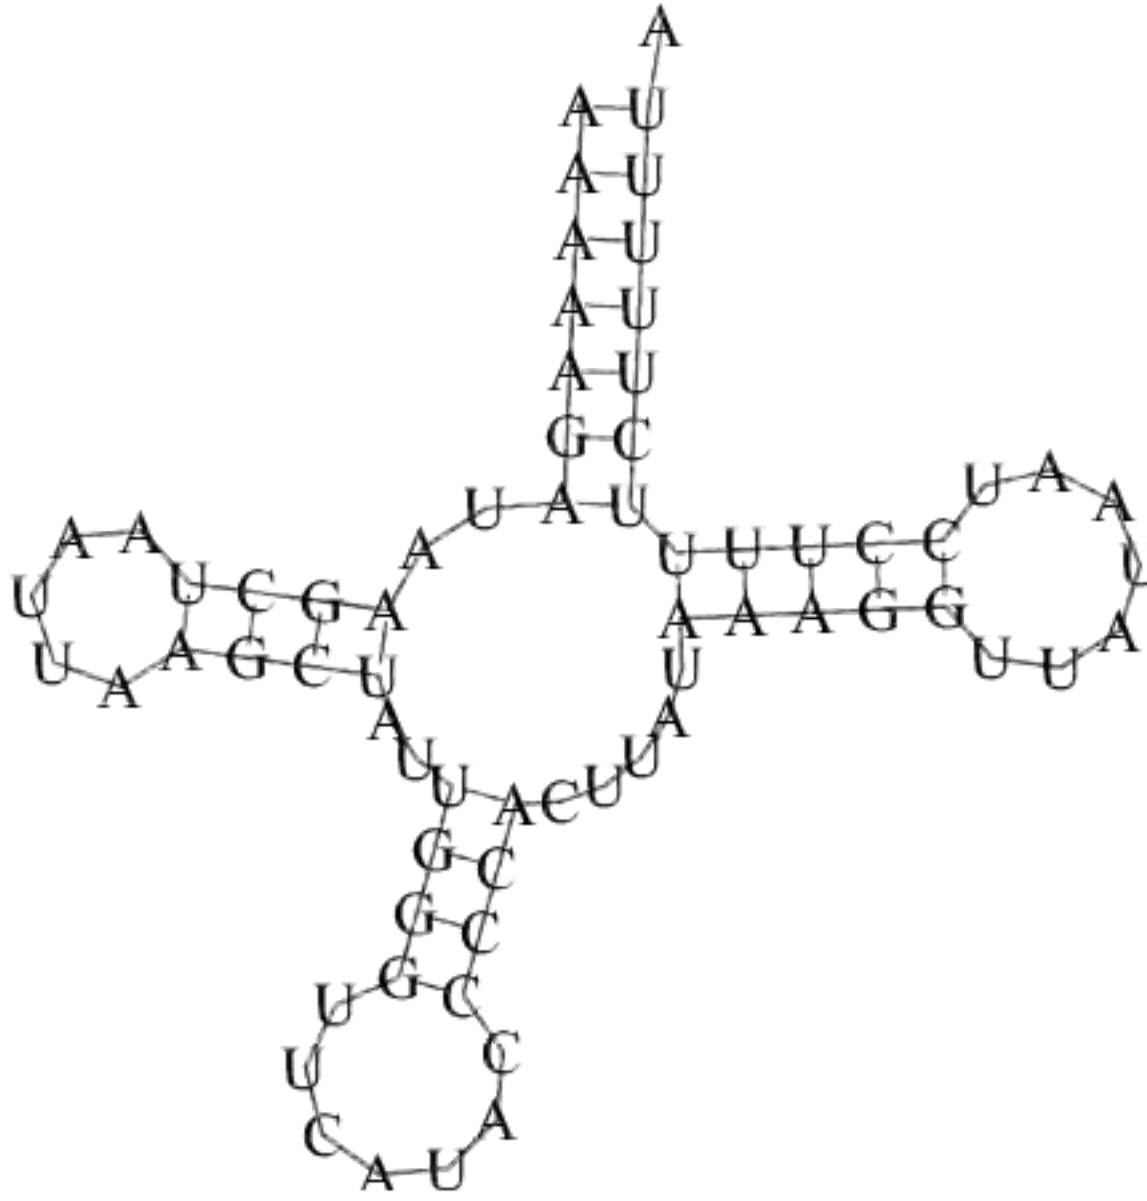

Phenylalanine(gaa)

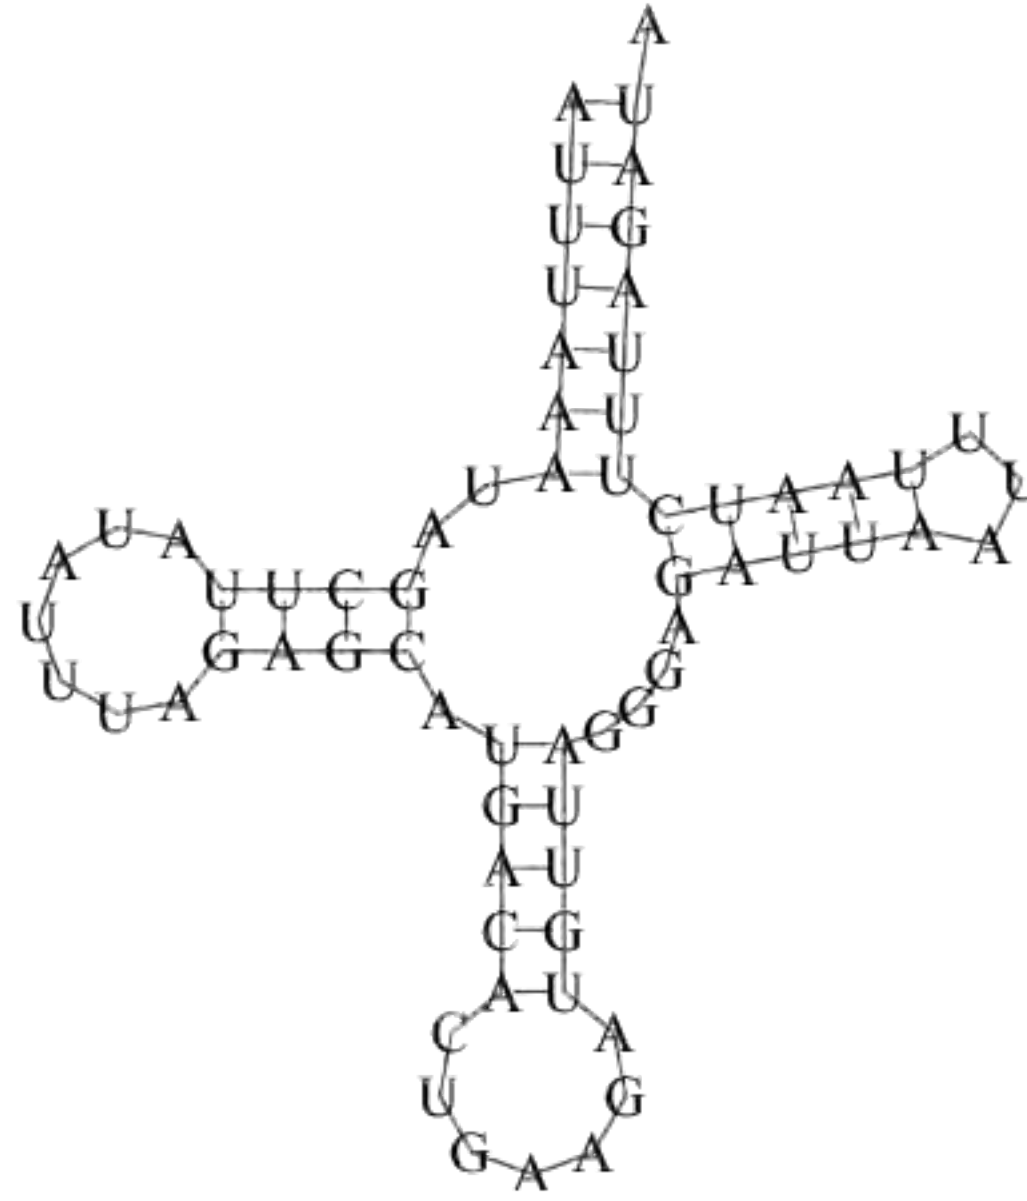

Proline(ugg)

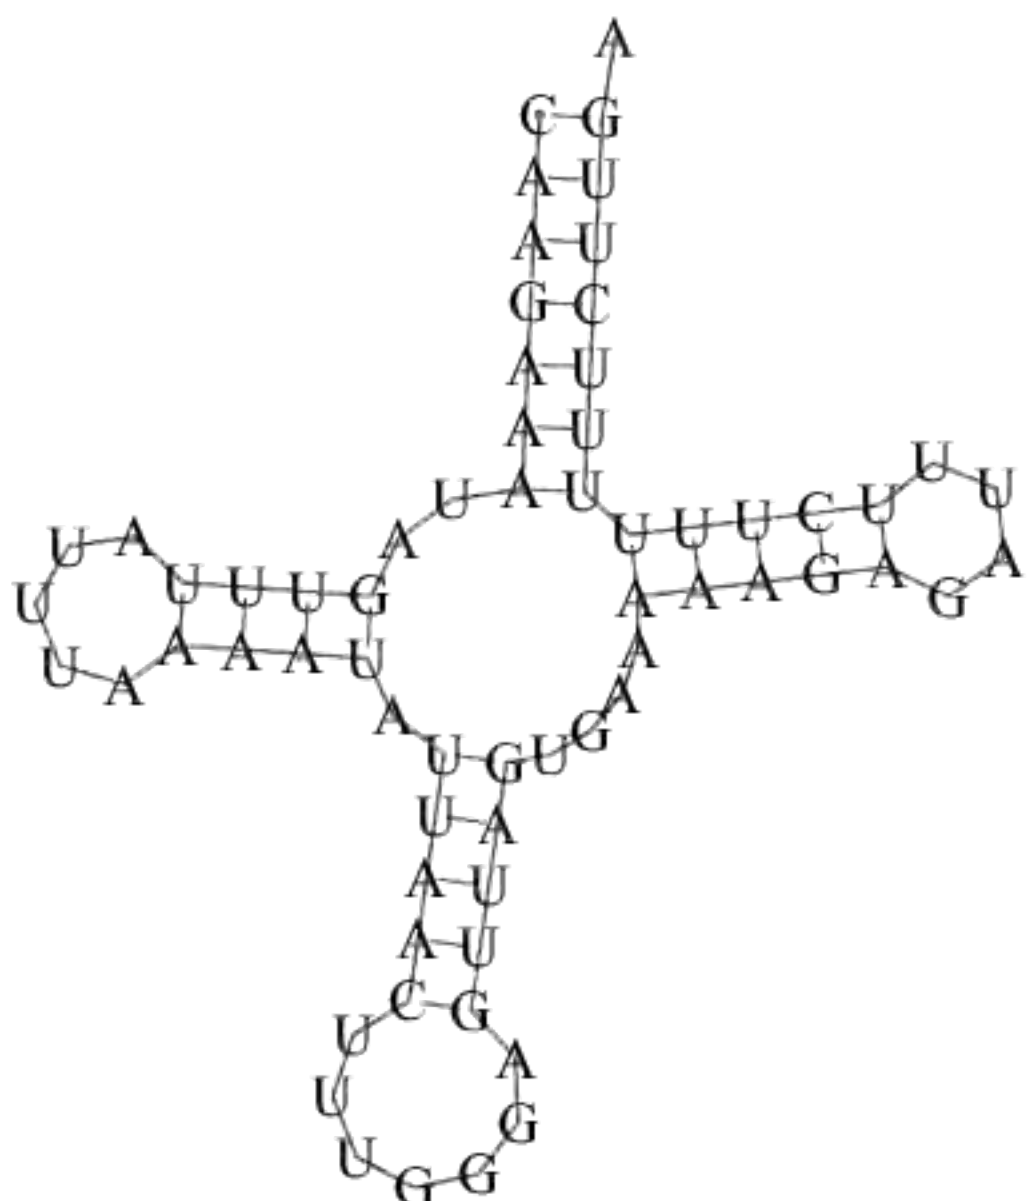

Serine(gcu)

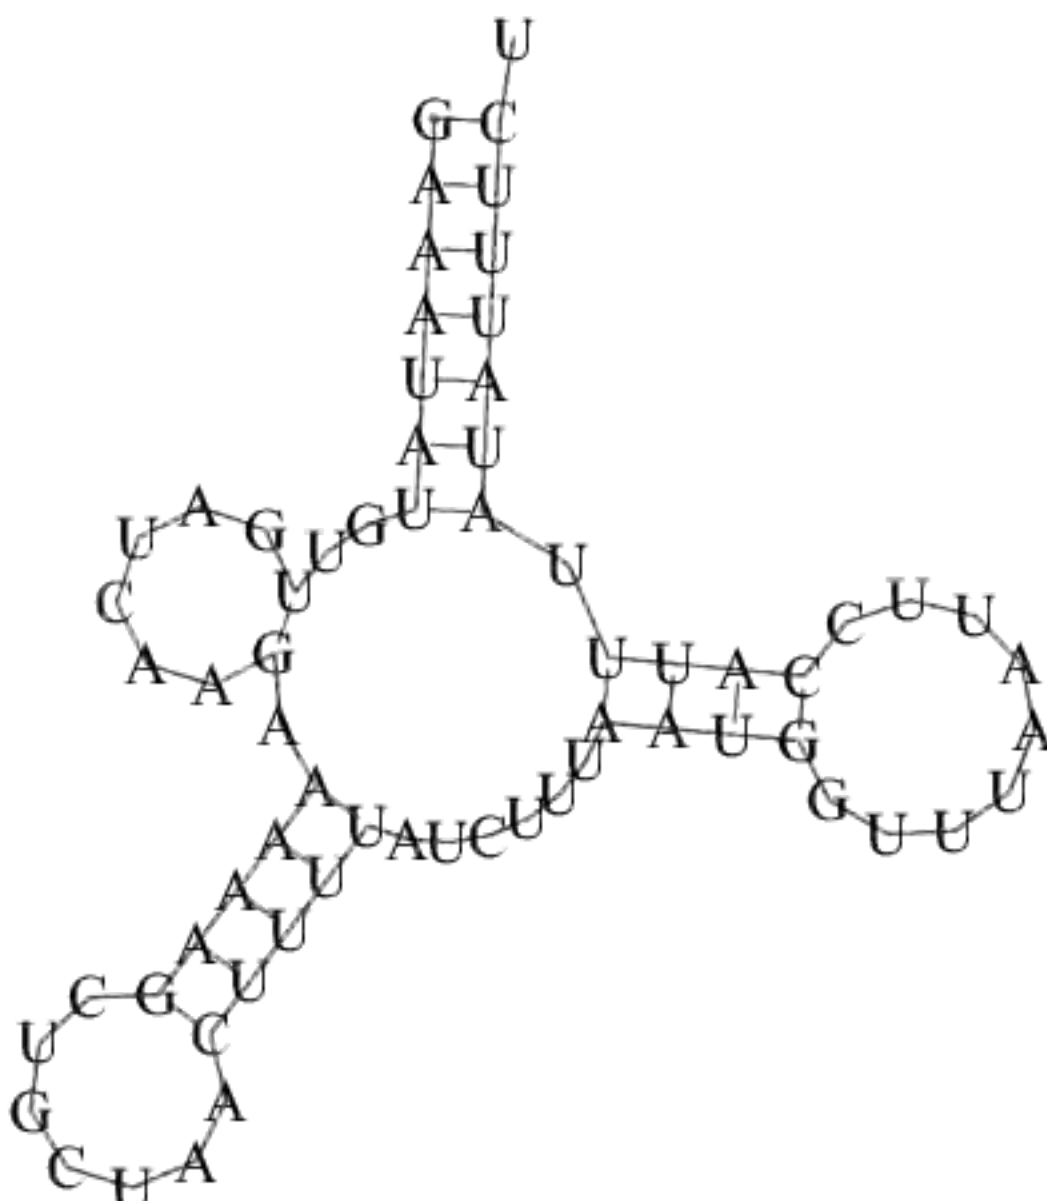

Serine(uga)

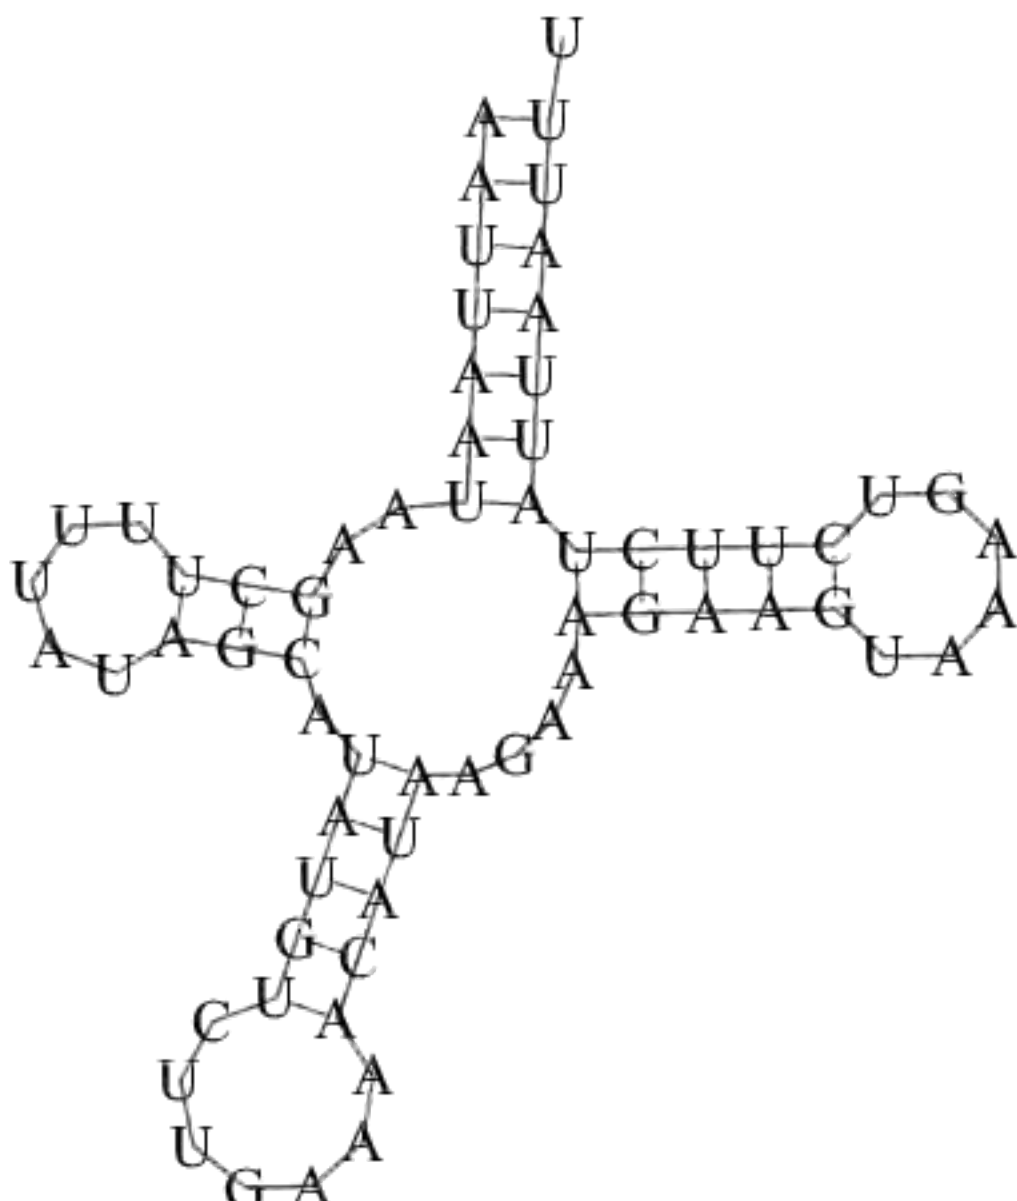

Threonine(ugu)

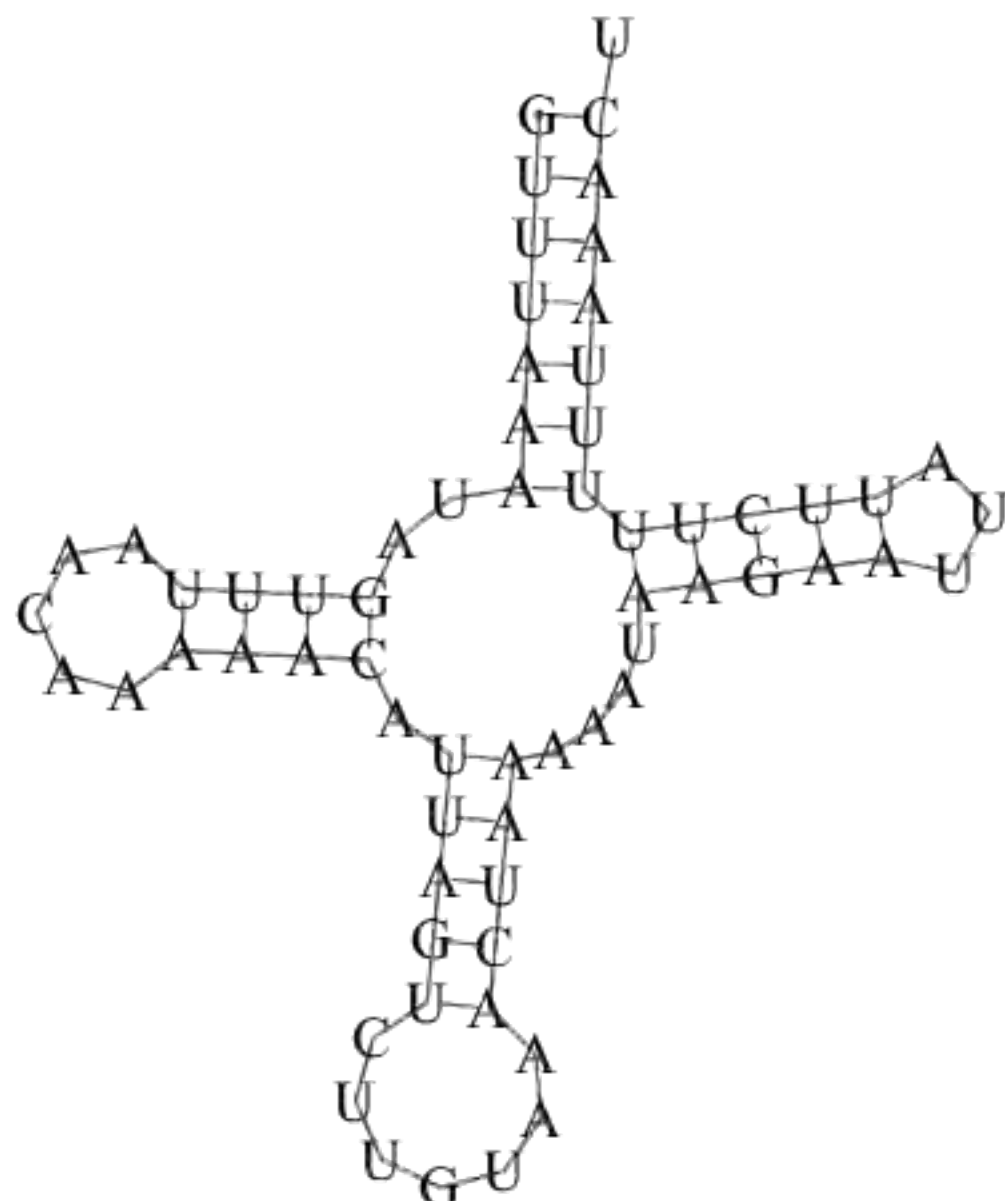

Tryptophan(uca)

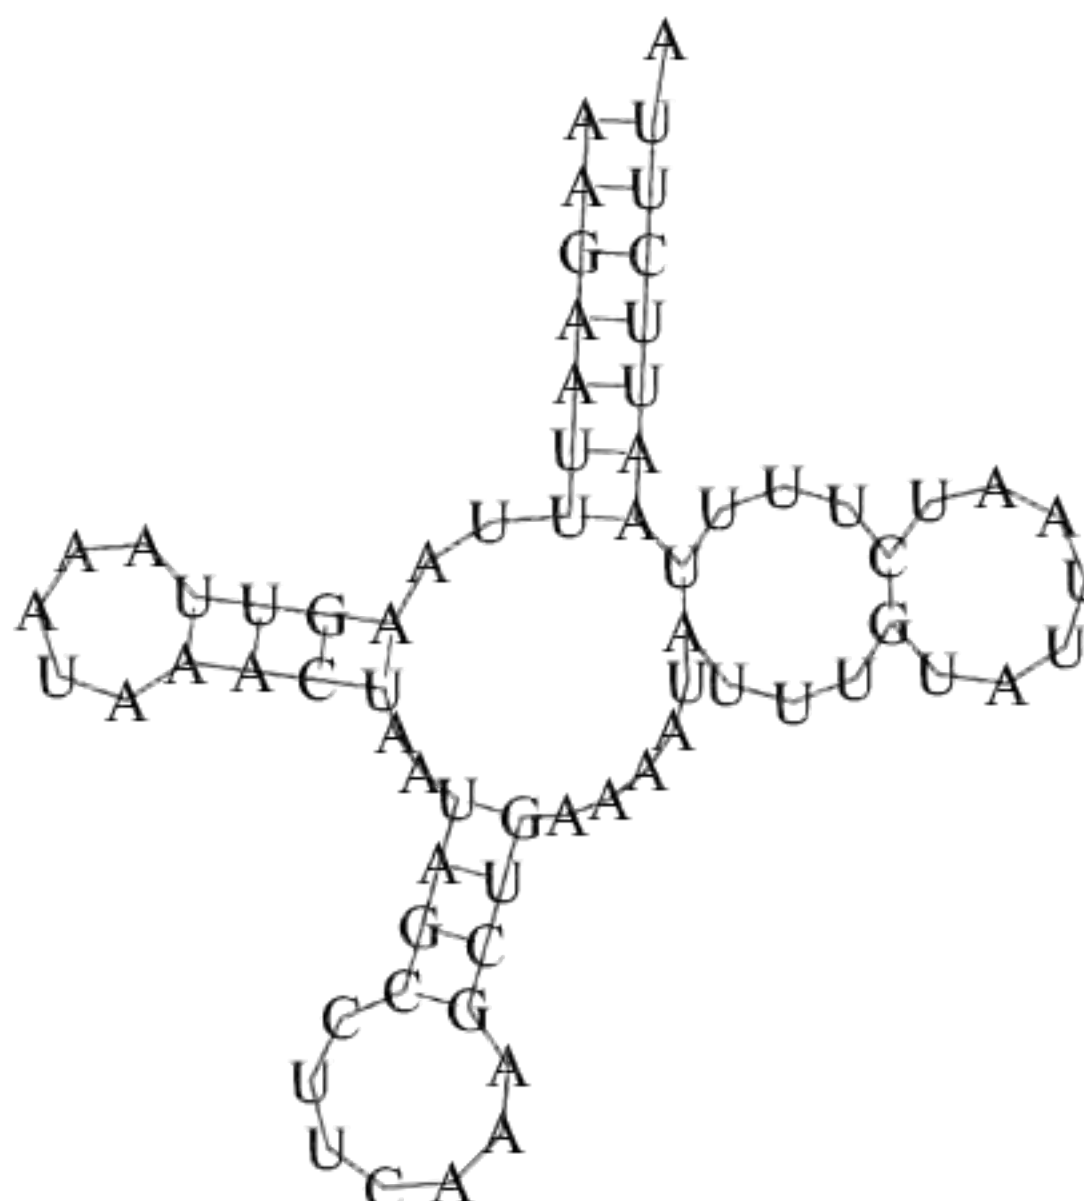

Tyrosine(gua)

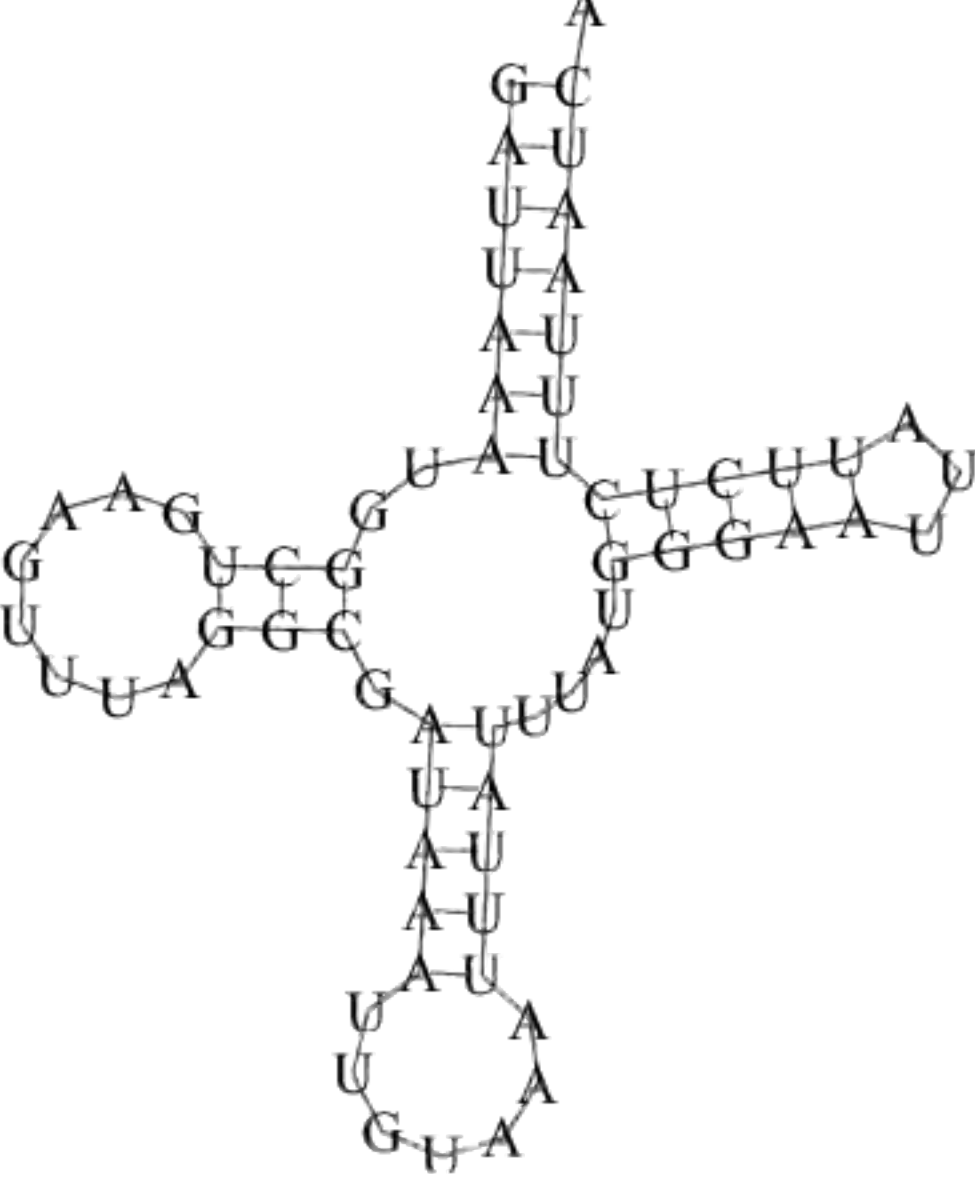

Valine(uac)

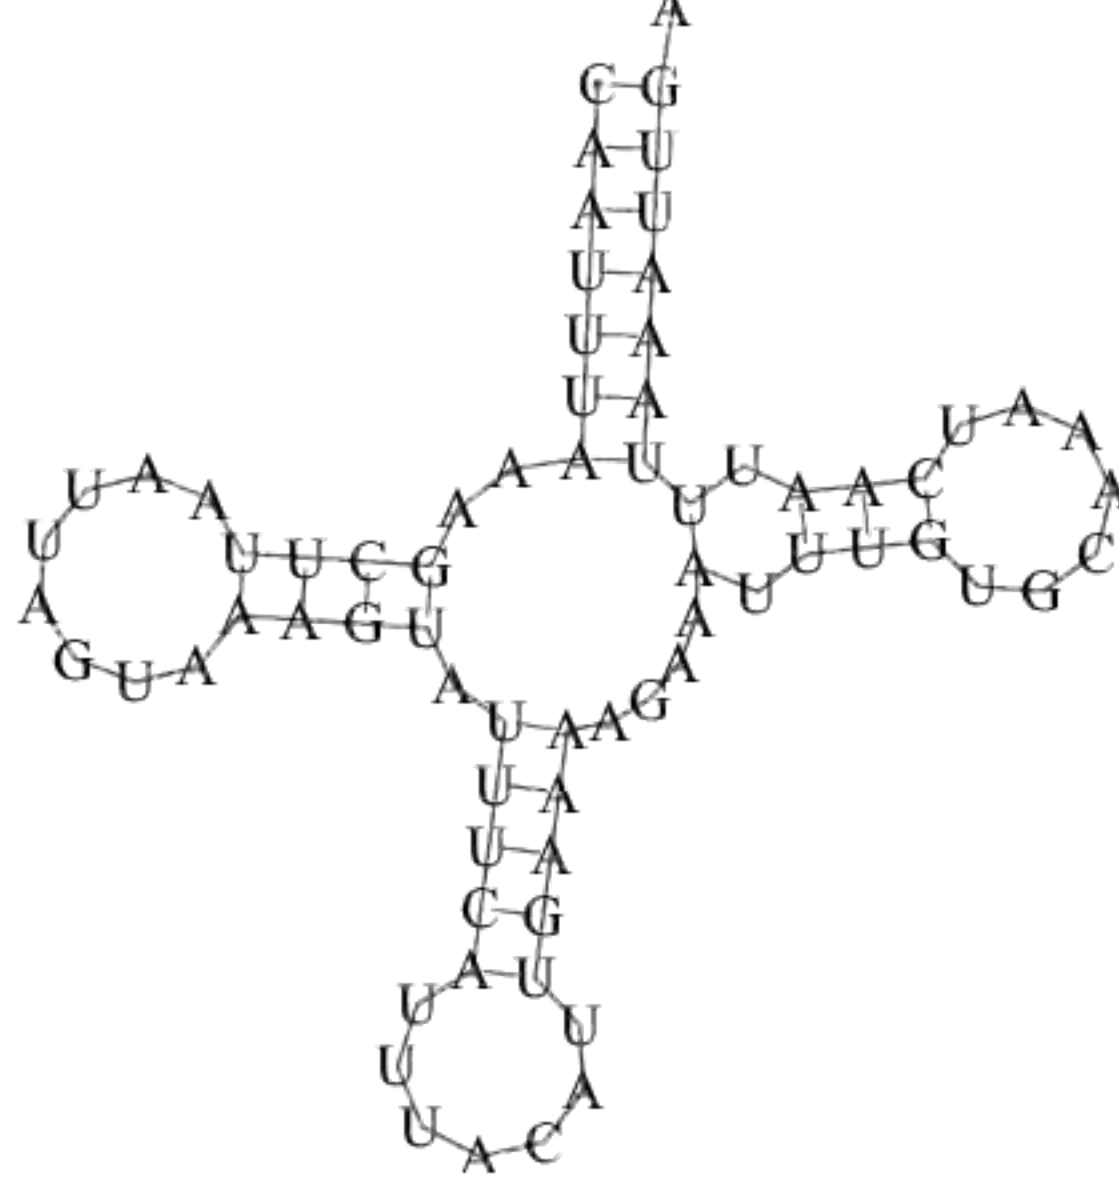



*An. lesteri*

Alanine(ugc)

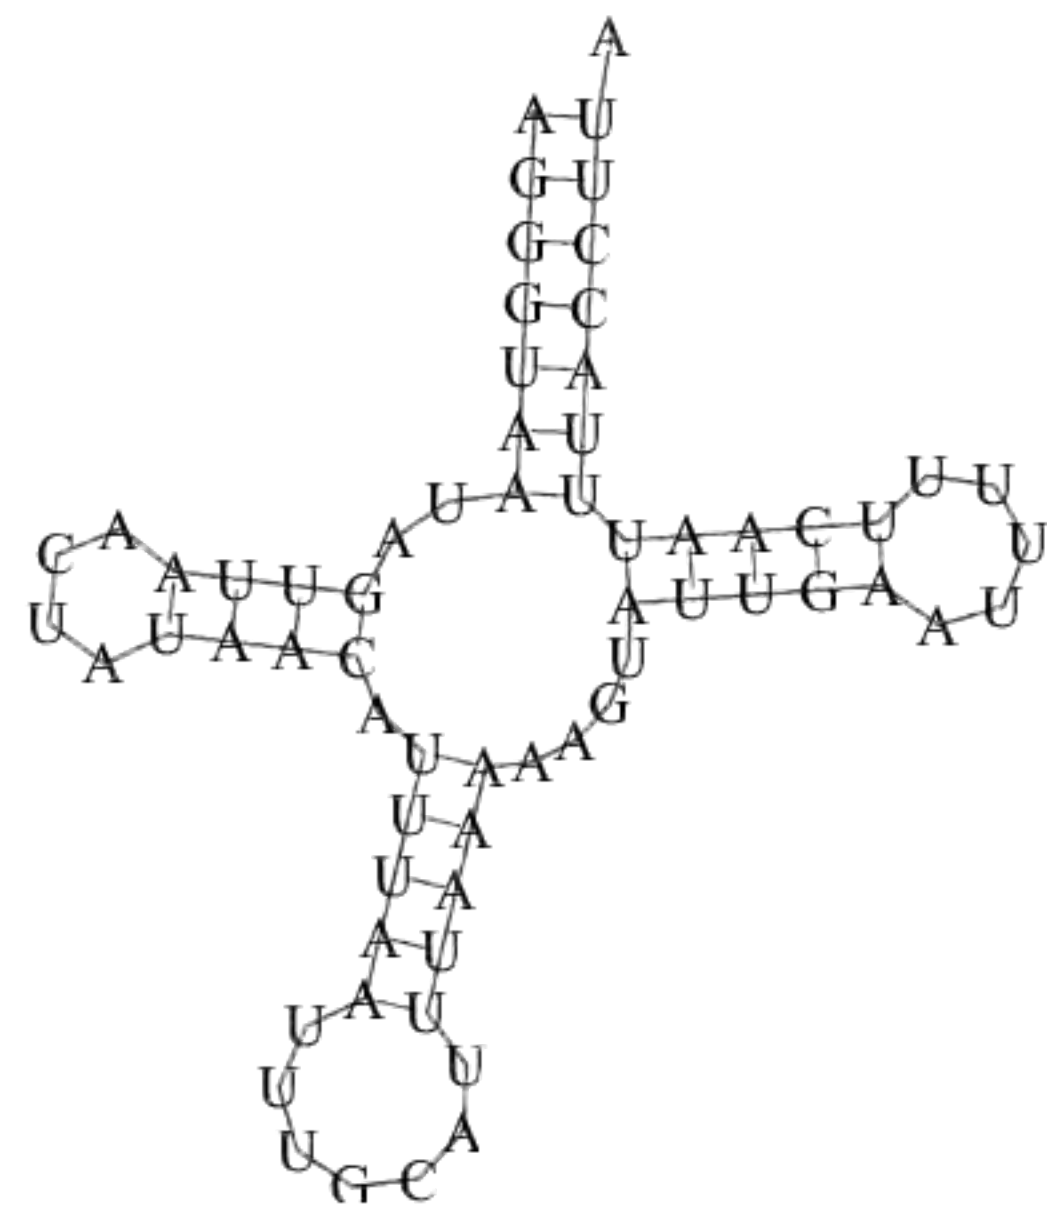

Arginine(ucg)

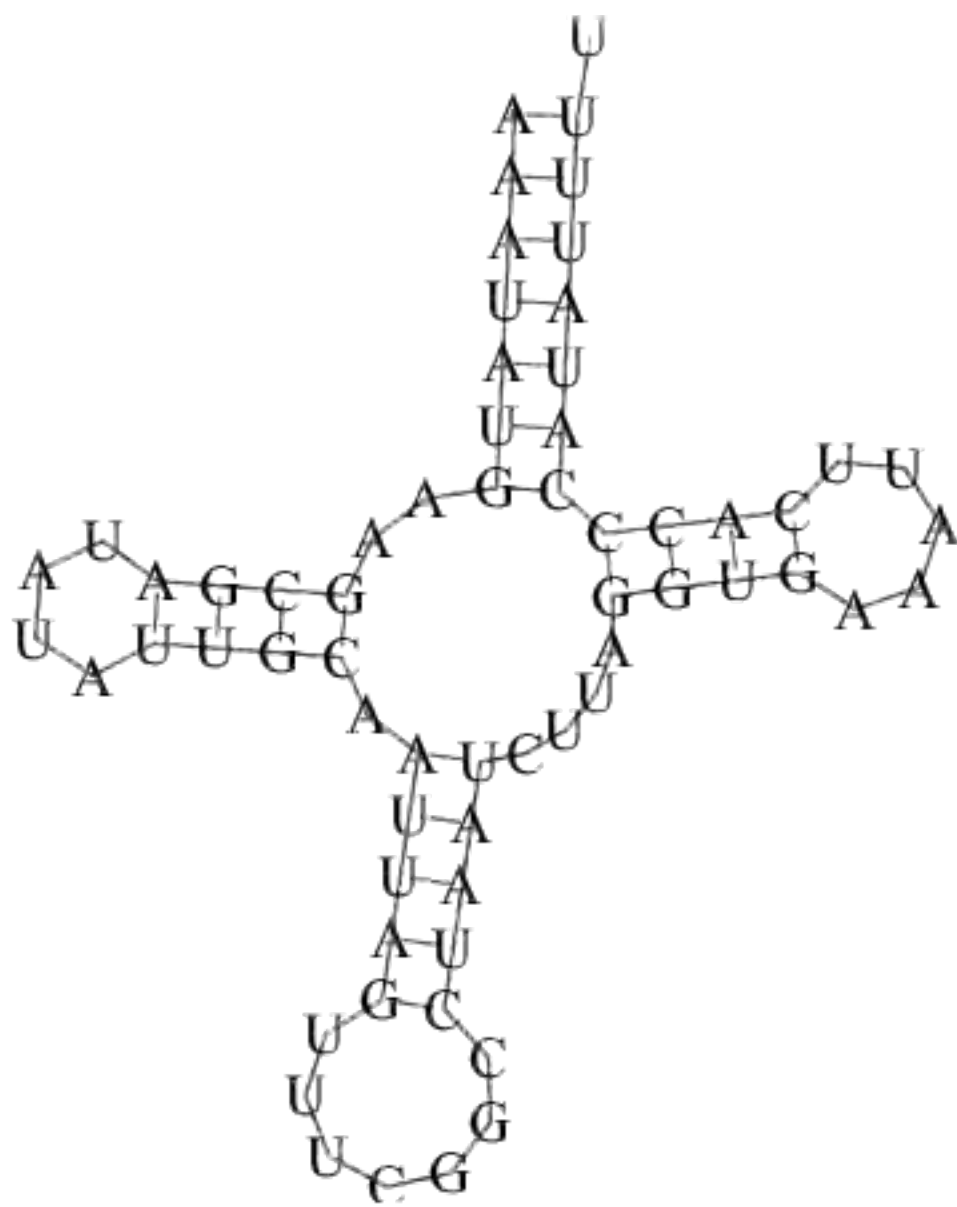

Asparagine(guu)

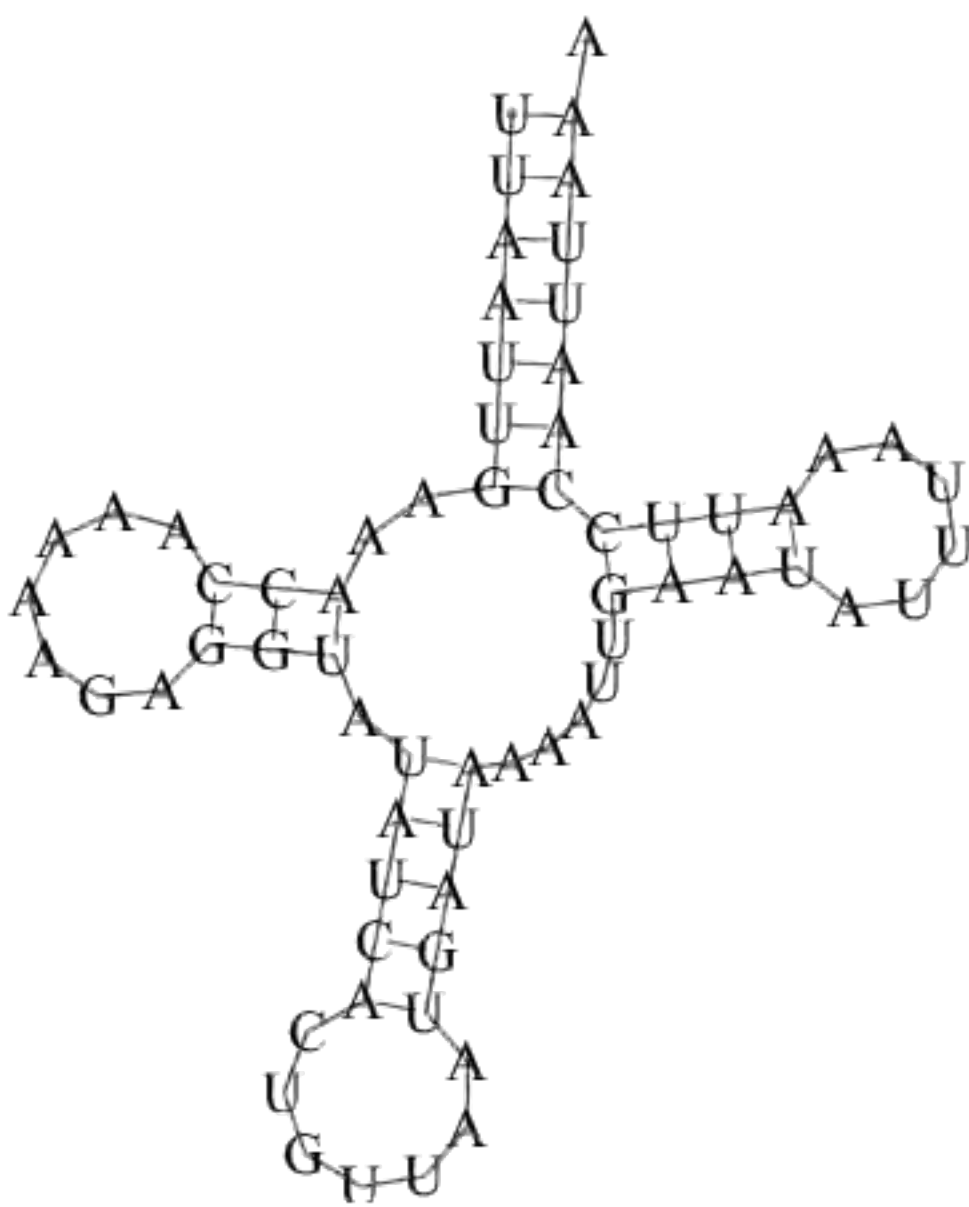

Aspartic acid(guc)

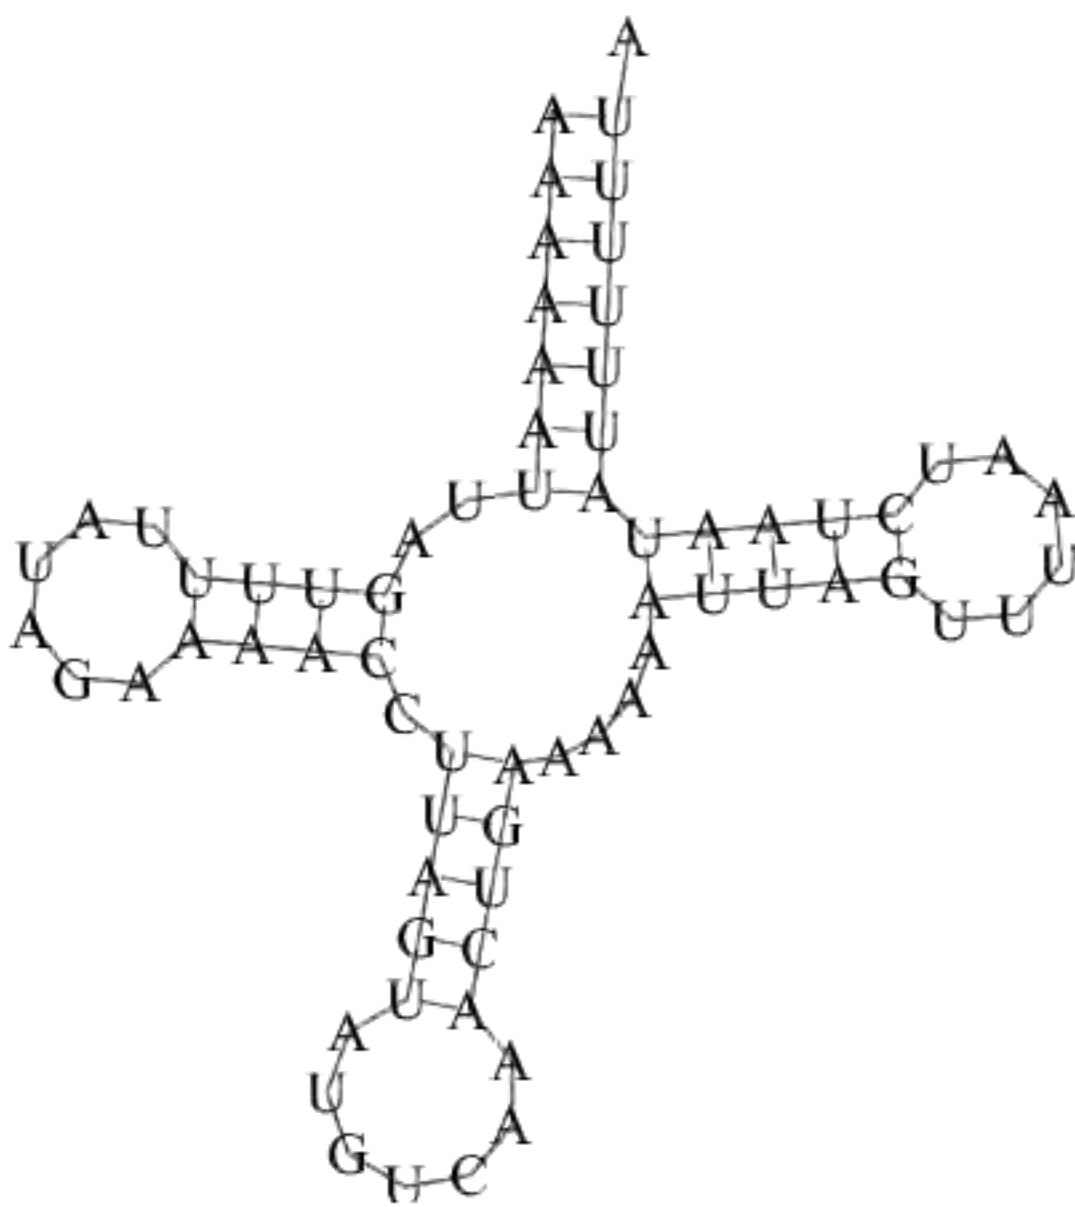

Cysteine(gca)

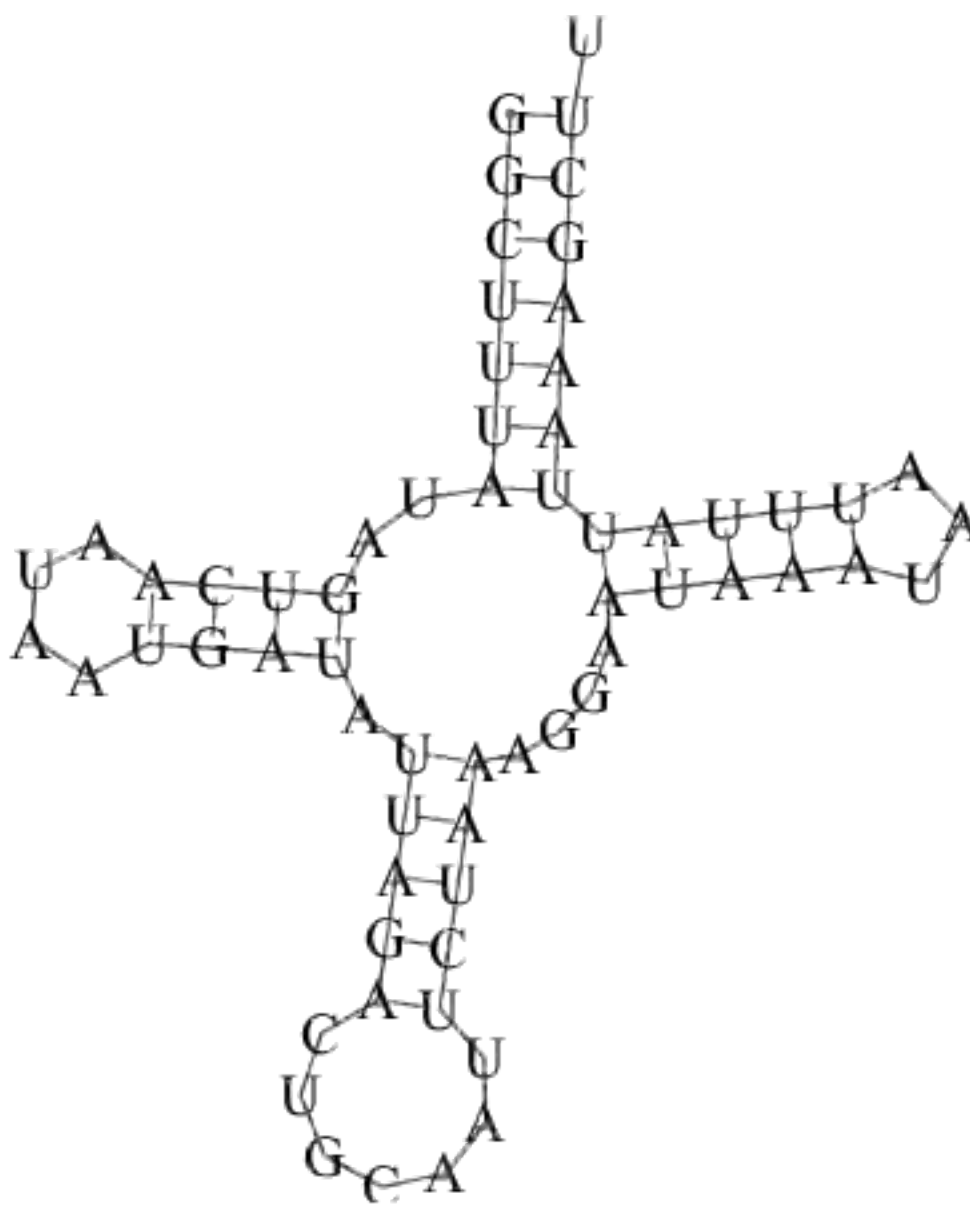

Glutamine(uuc)

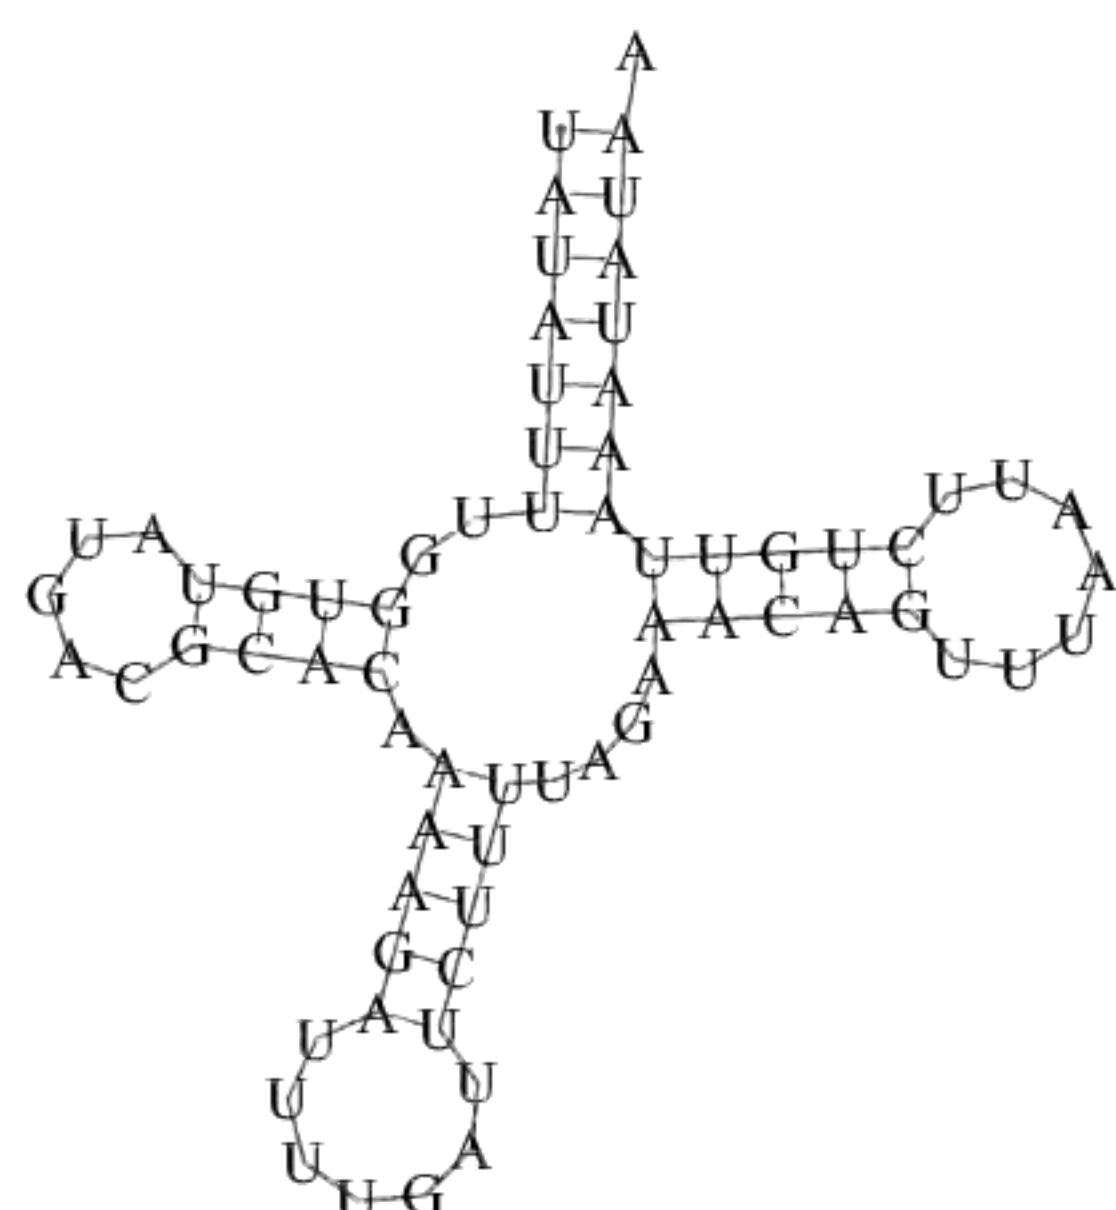

Glutamic acid(uug)

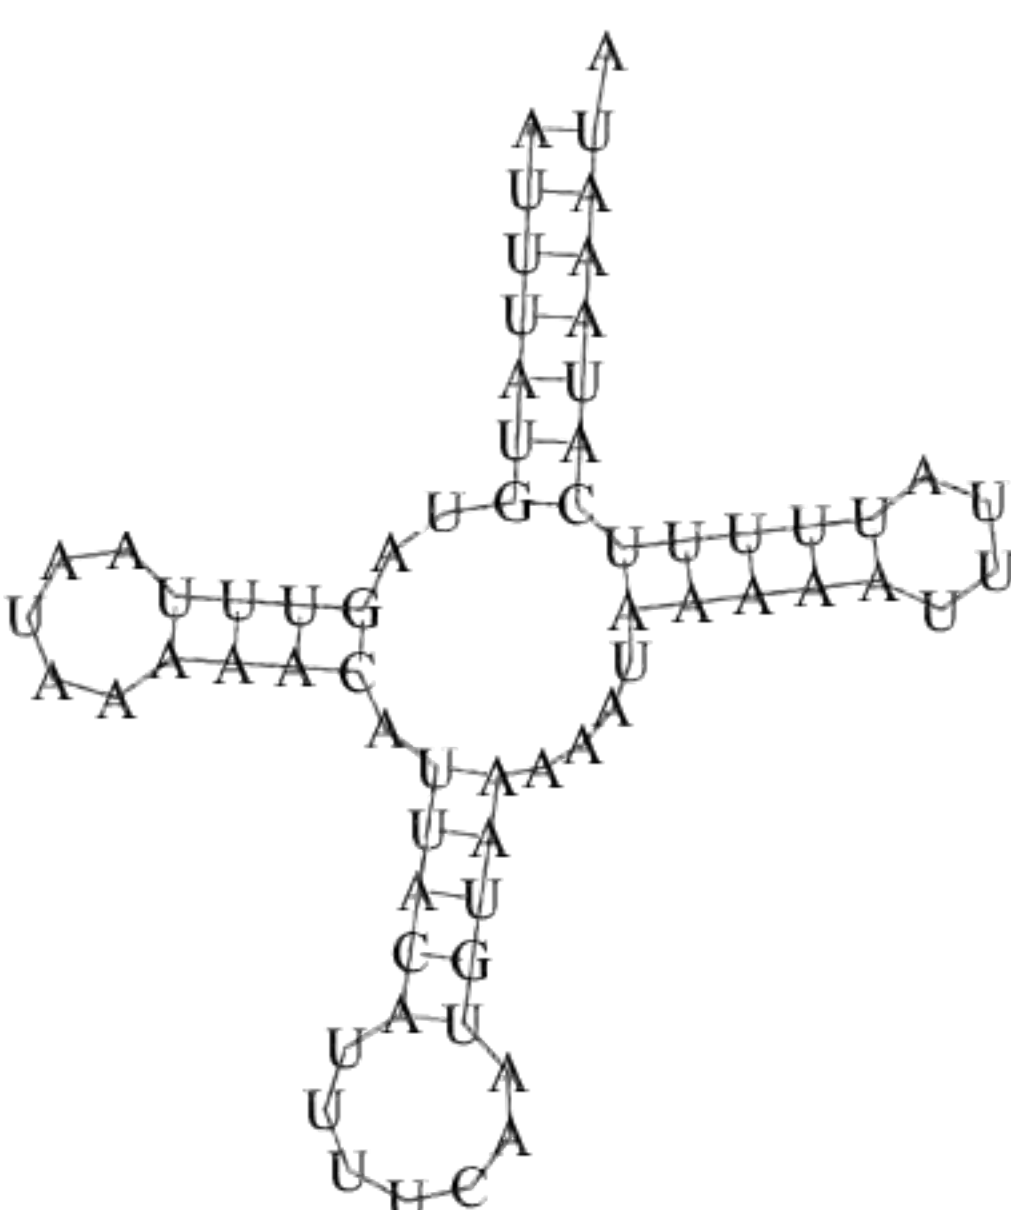

Glycine(ucc)

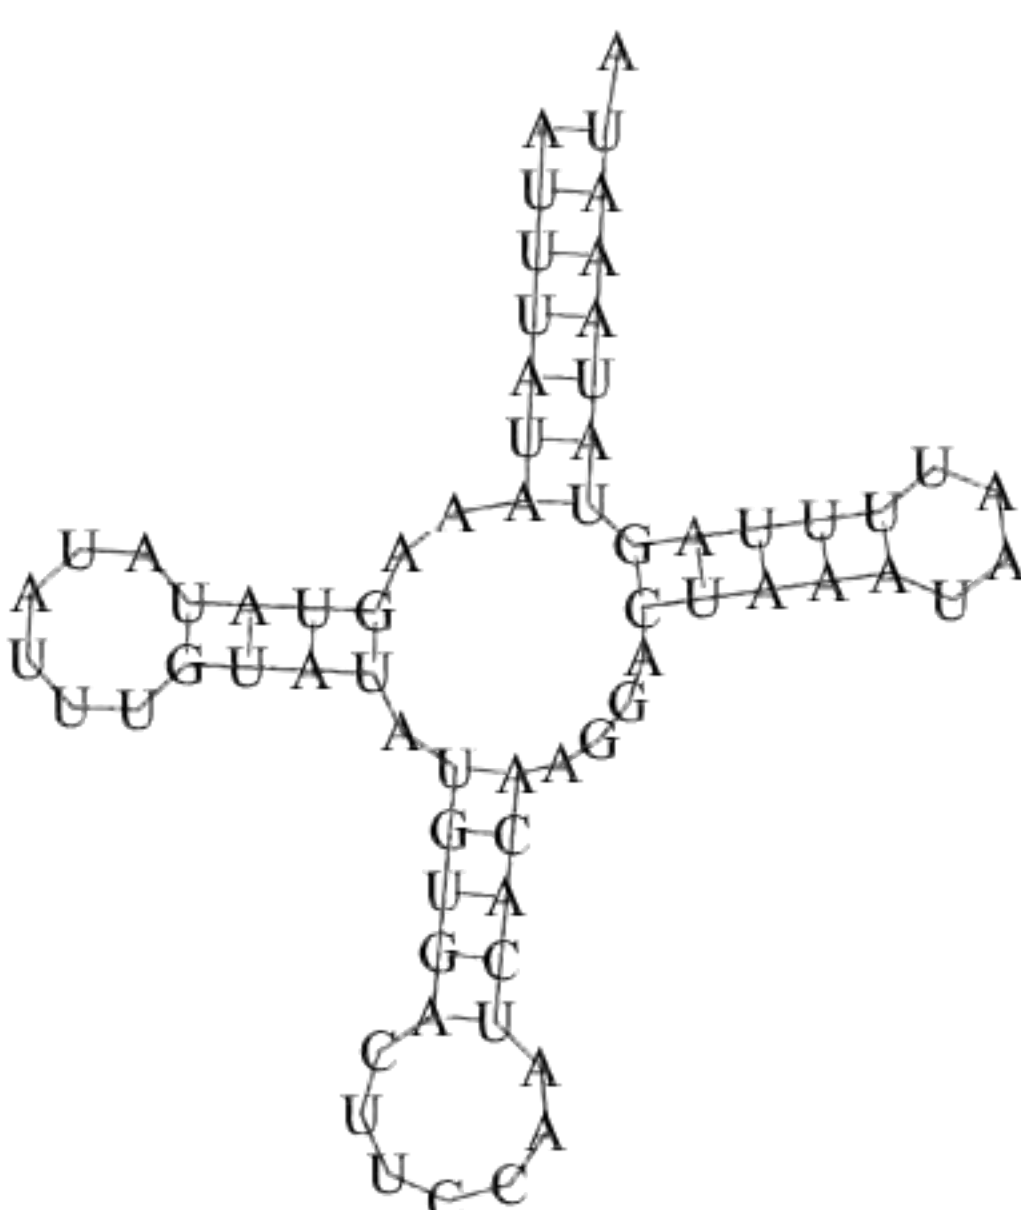

Histidine(gug)

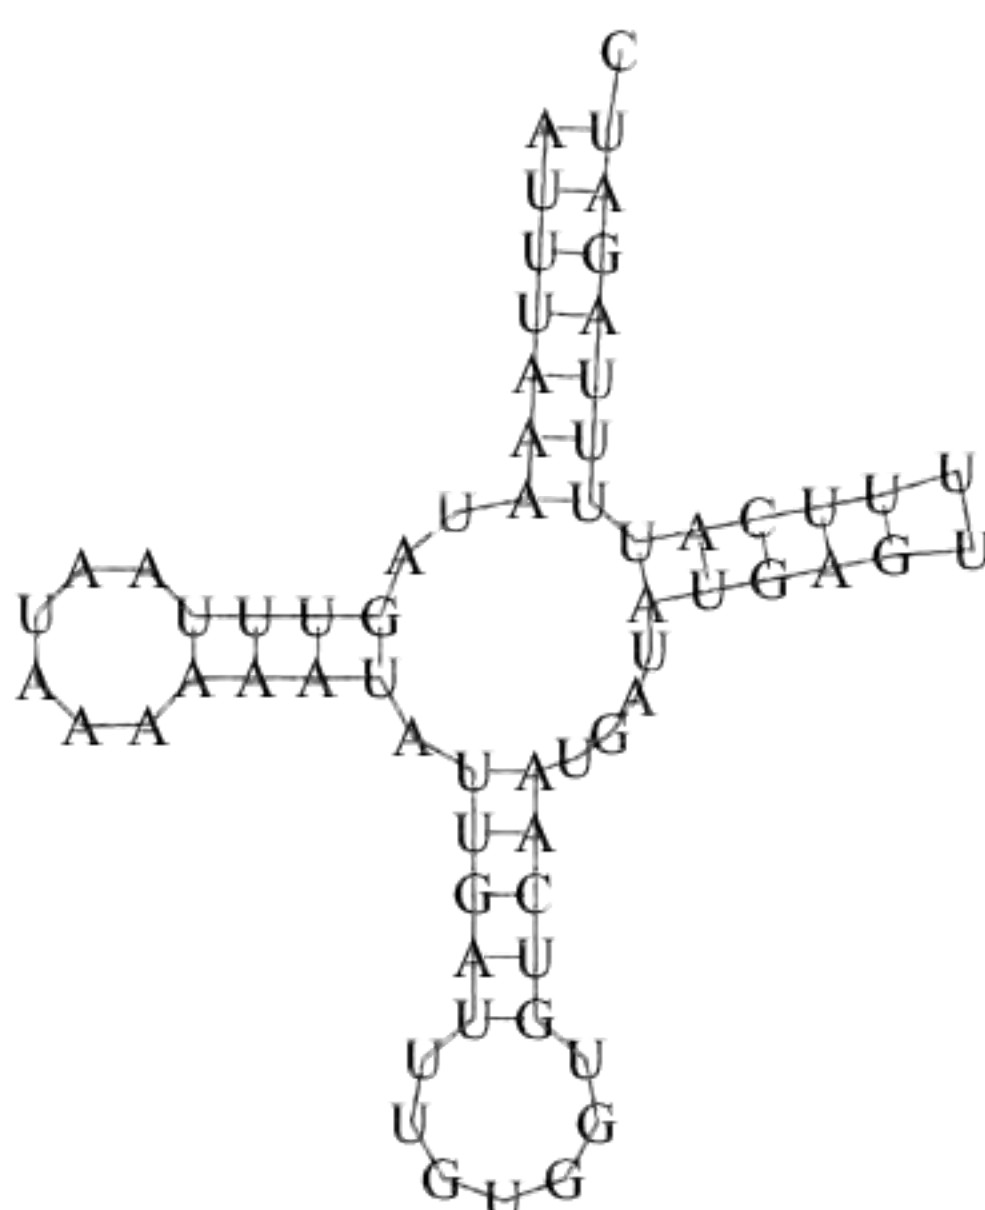

Isoleucine(gau)

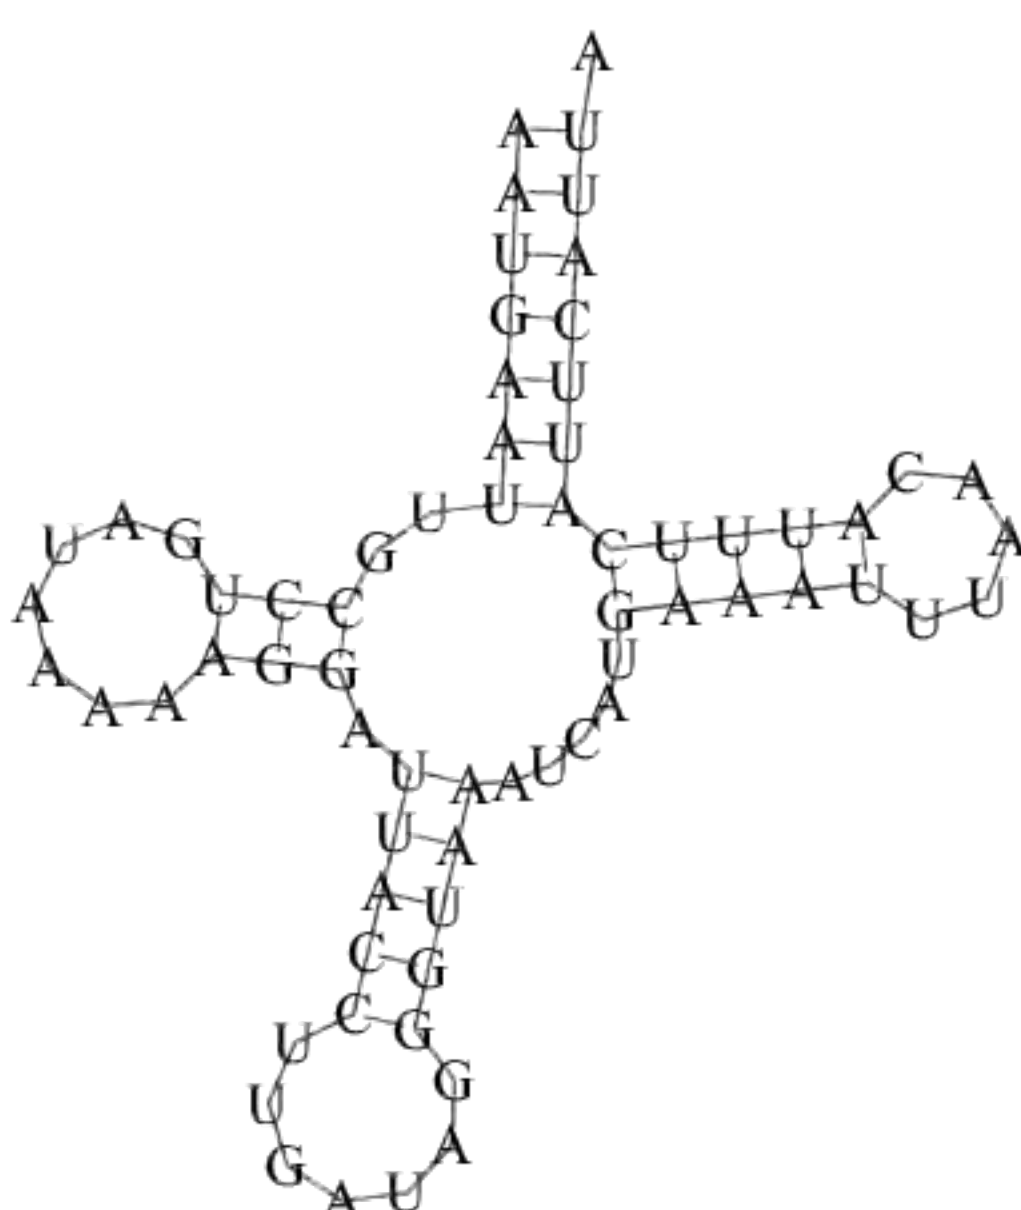

Leucine(uag)

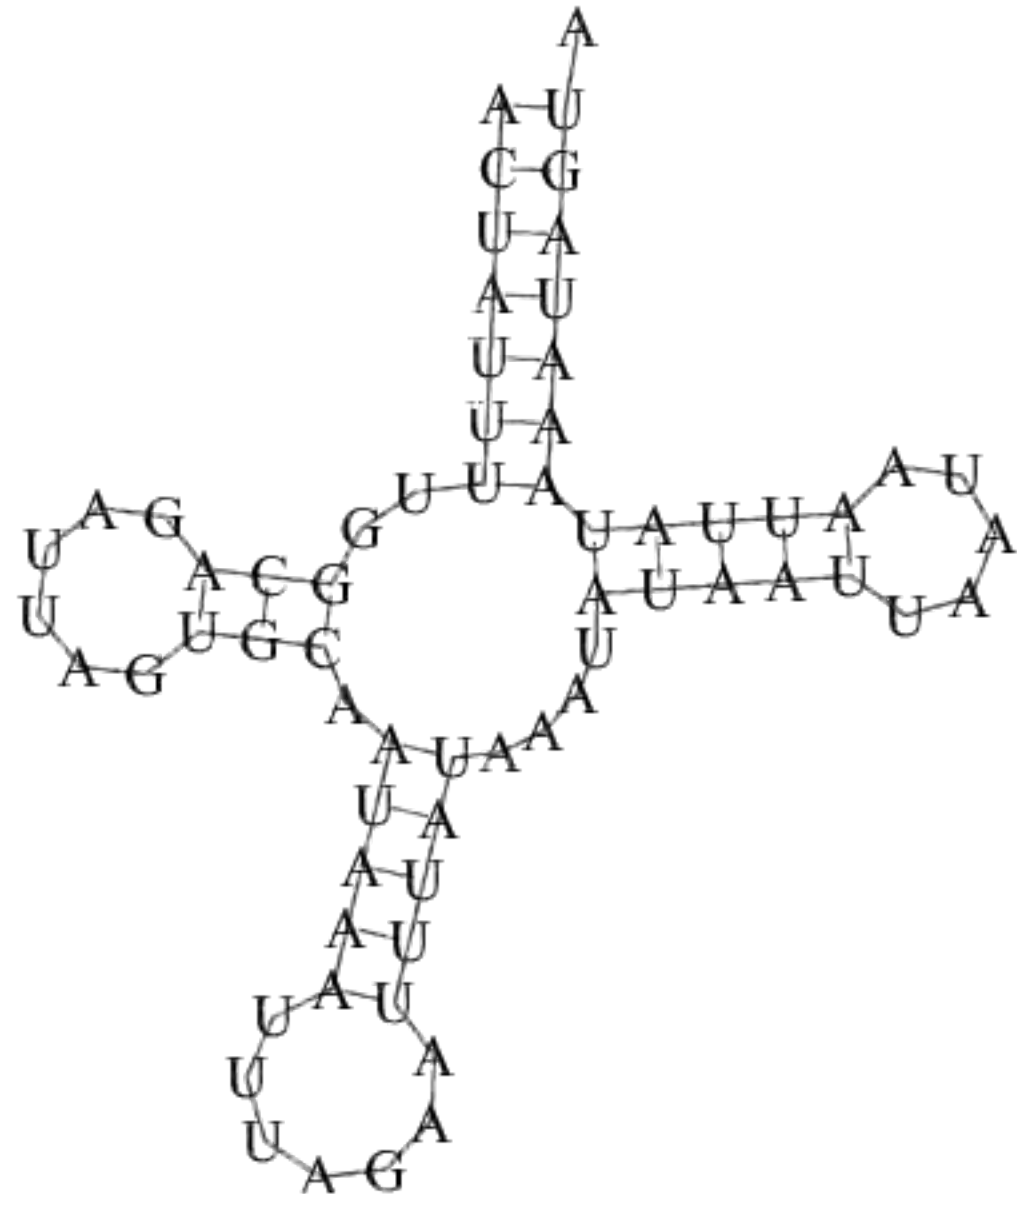

Leucine(uaa)

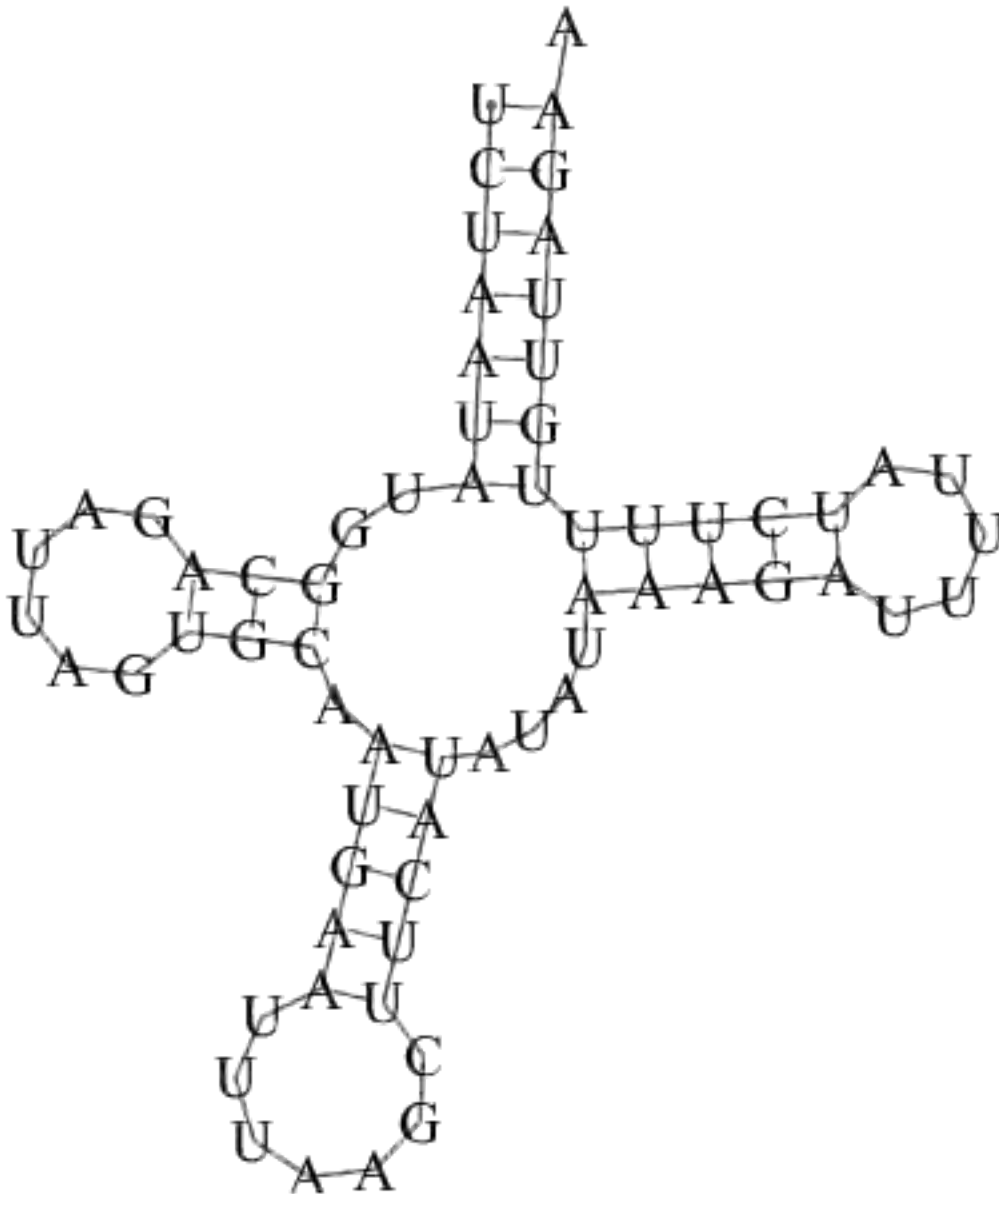

Lysine(cuu)

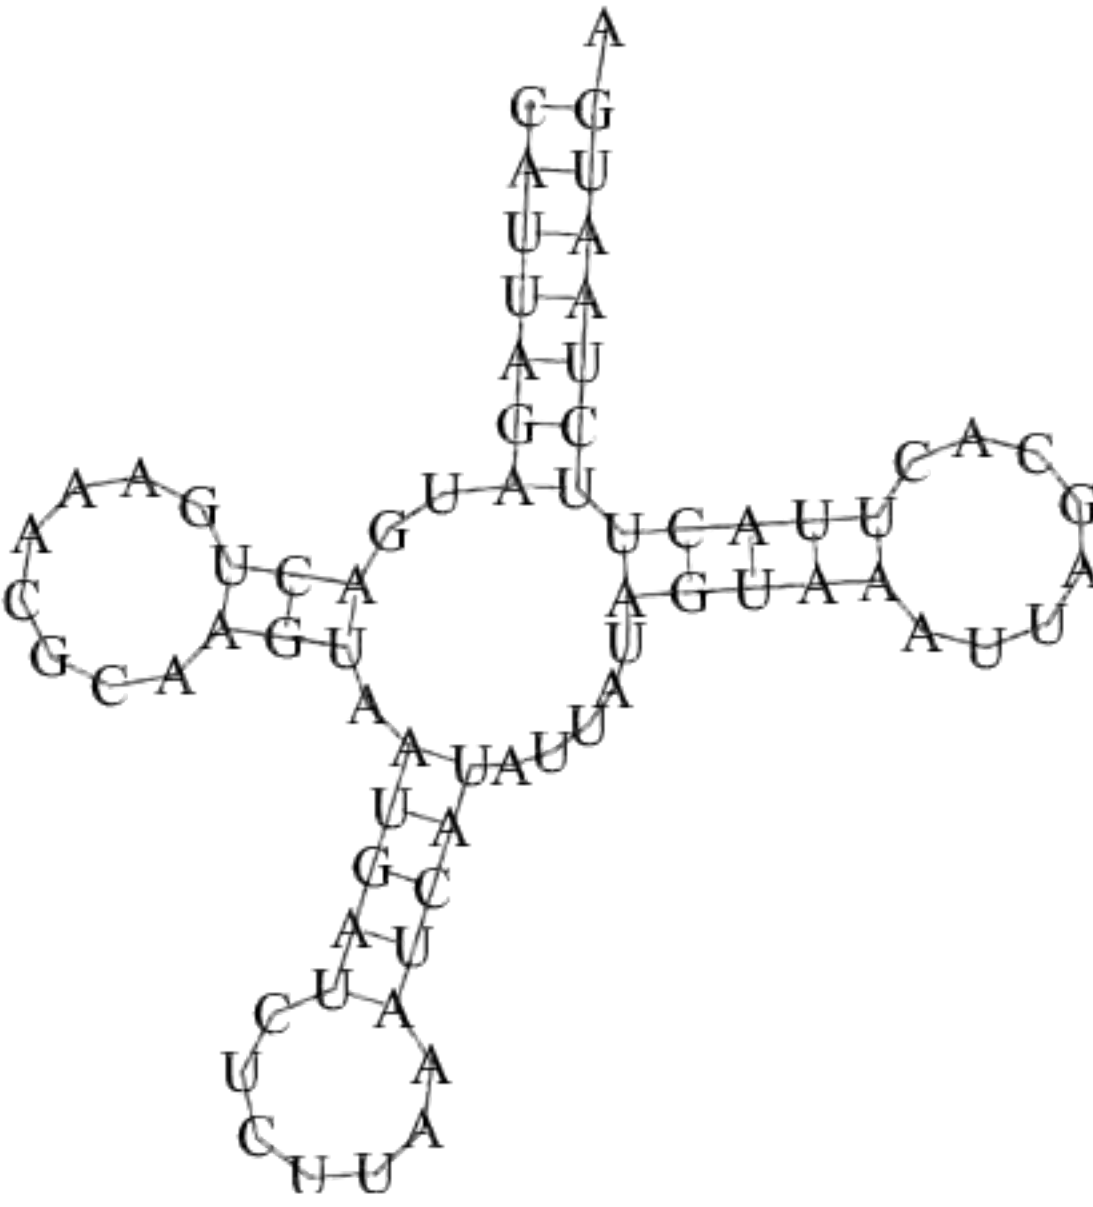

Methionine(cau)

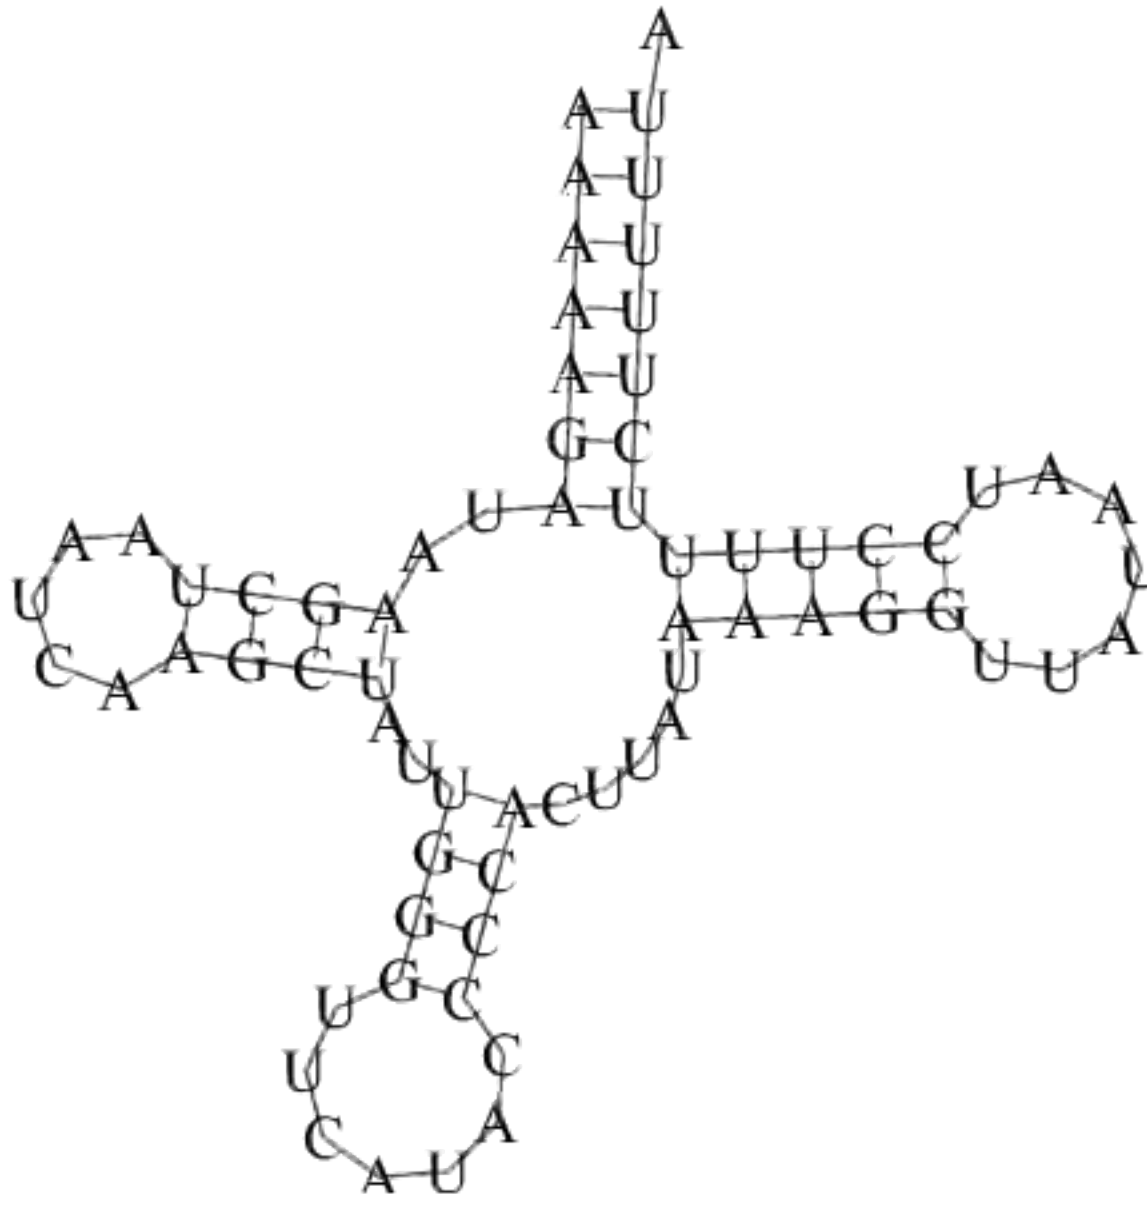

Phenylalanine(gaa)

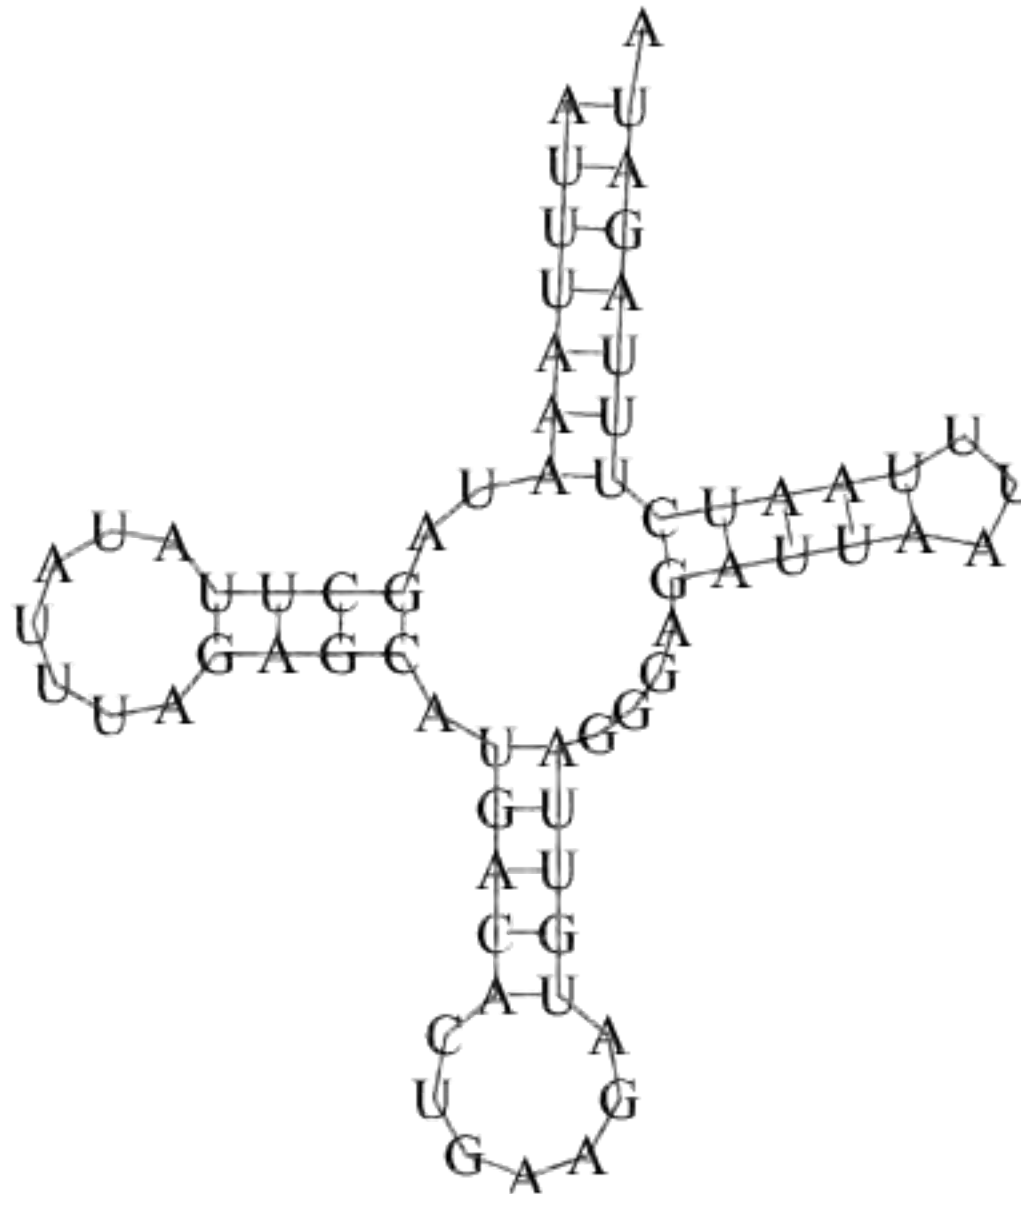

Proline(ugg)

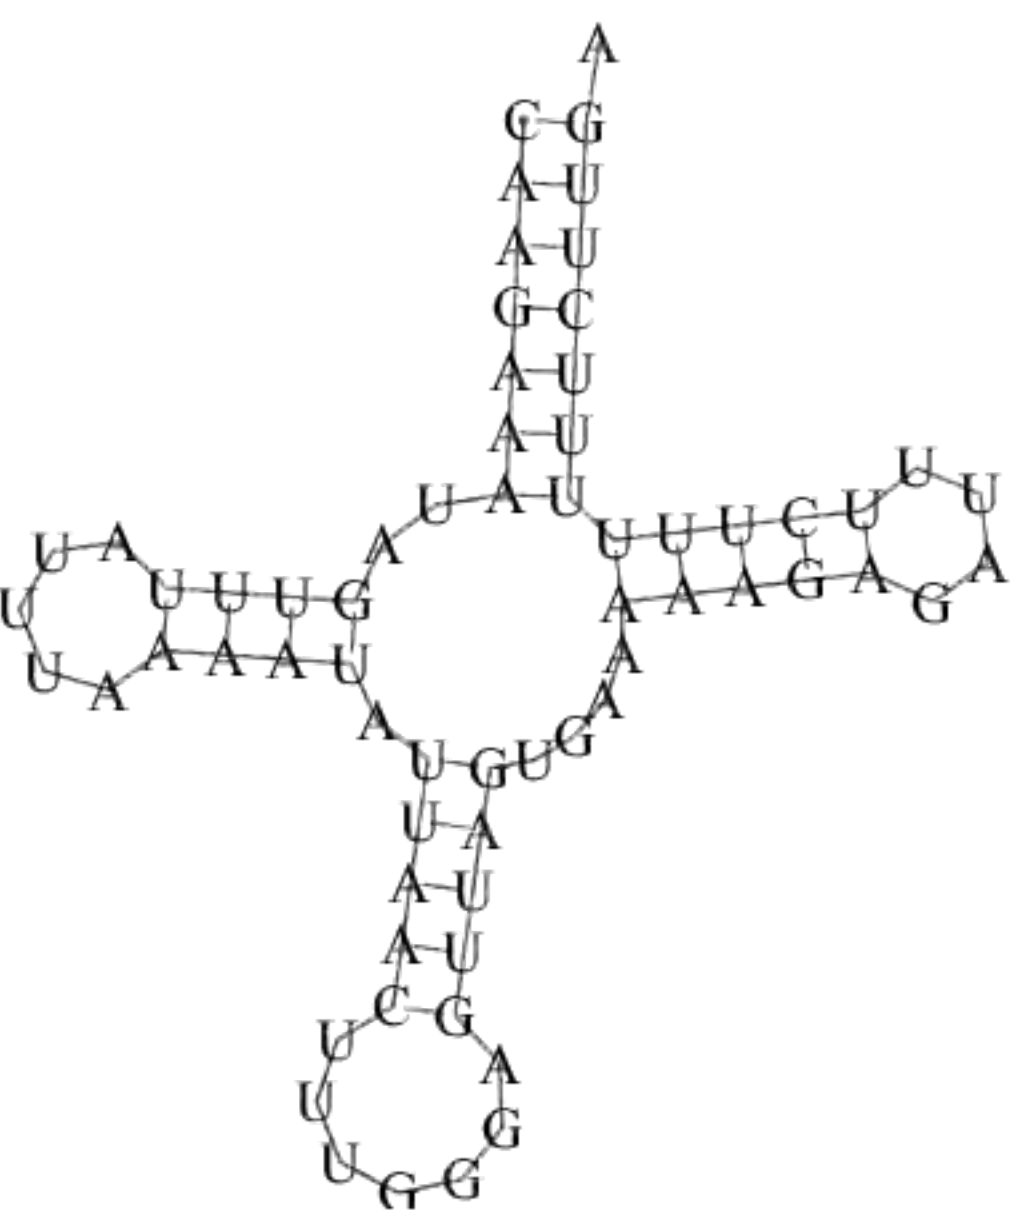

Serine(gcu)

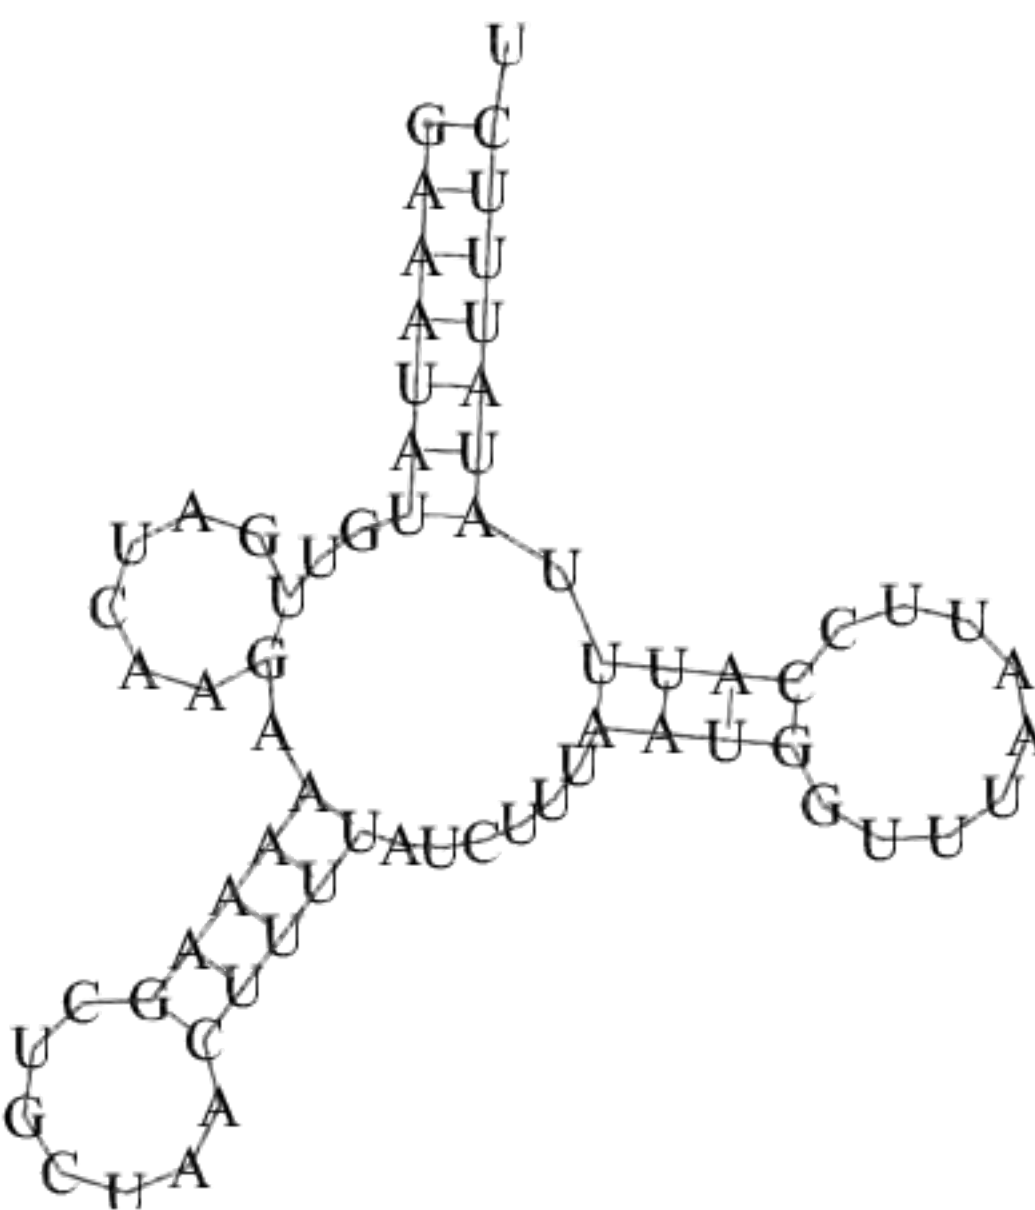

Serine(uga)

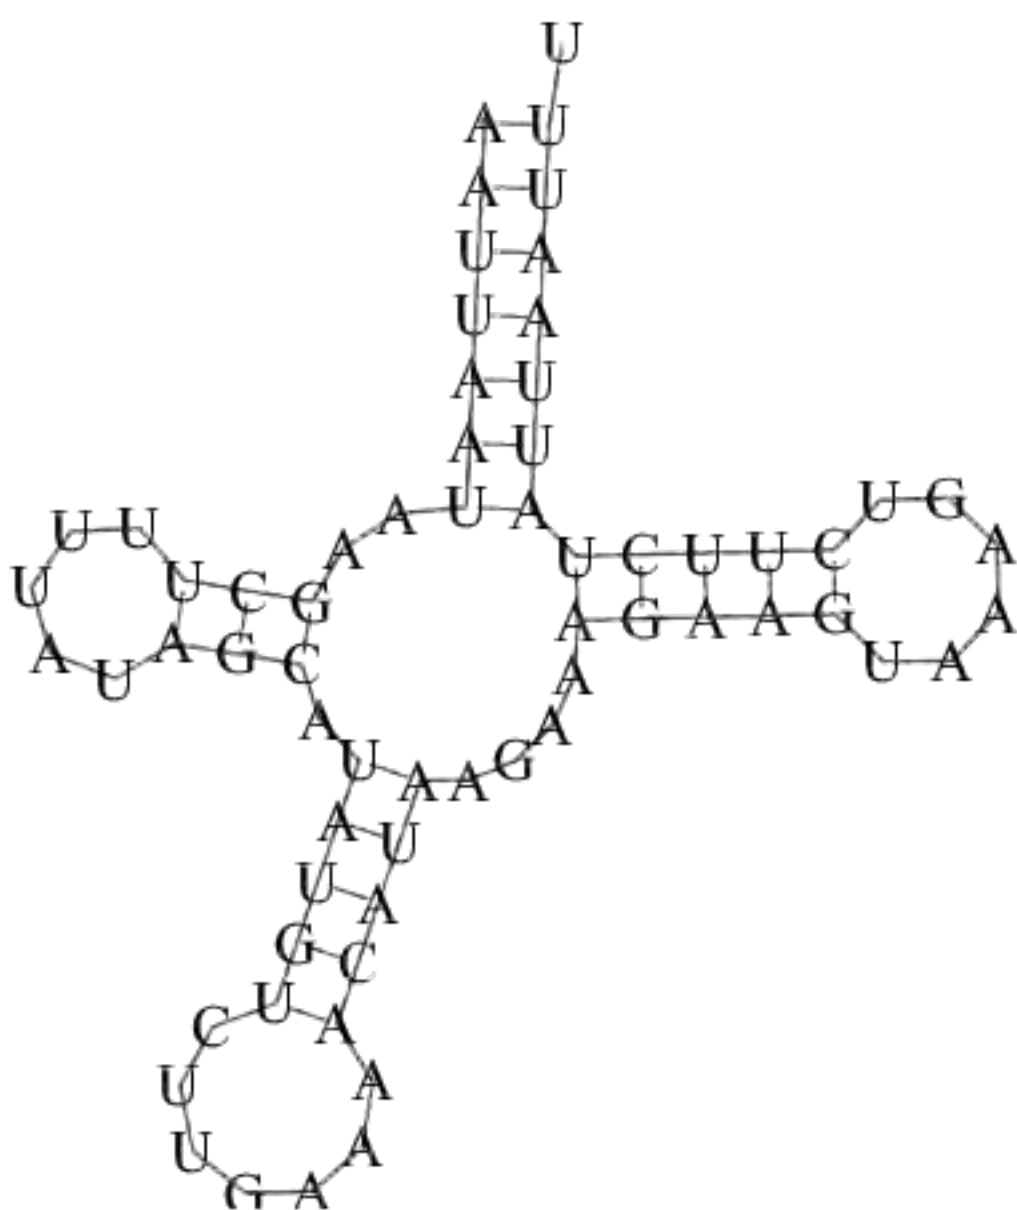

Threonine(ugu)

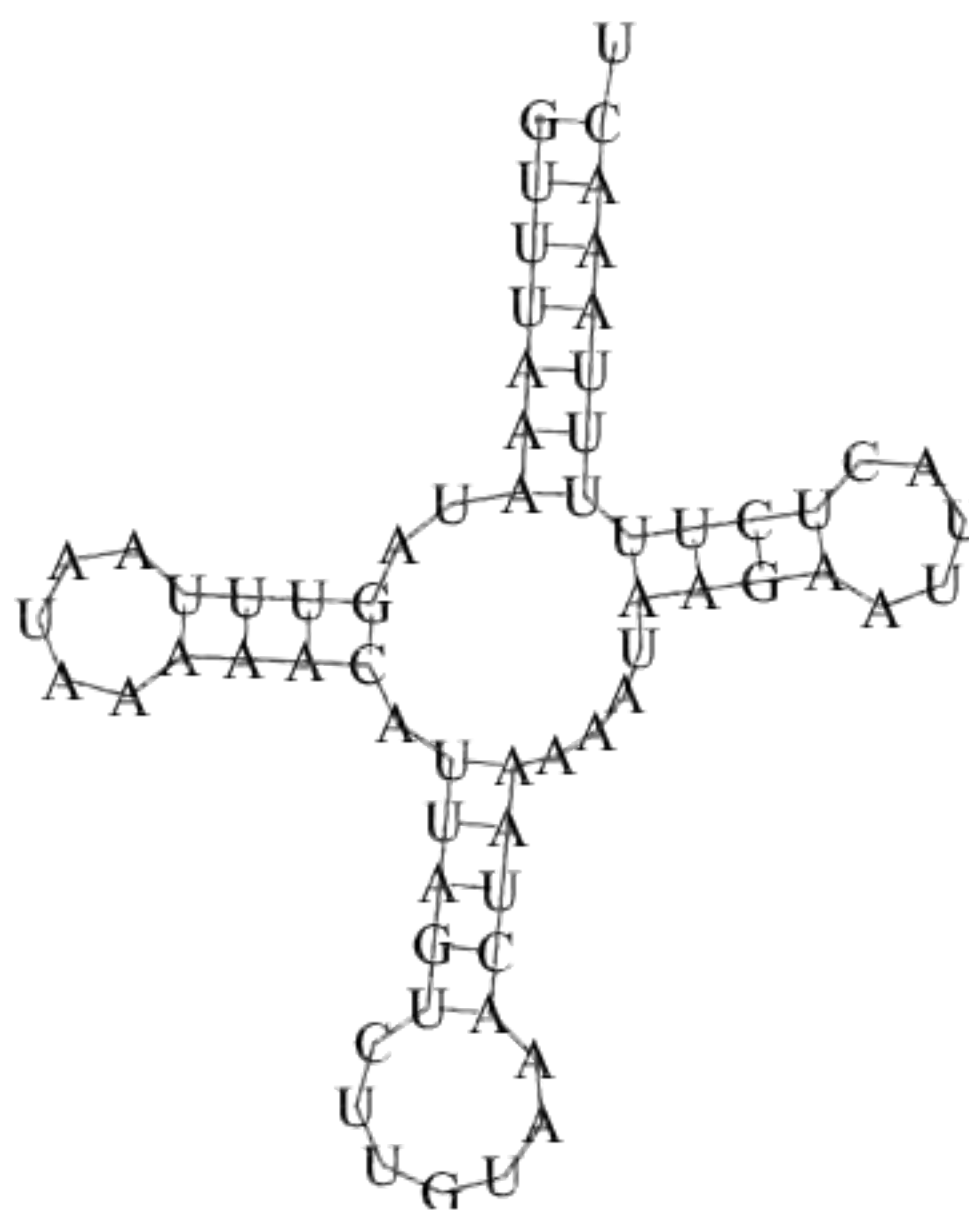

Tryptophan(uca)

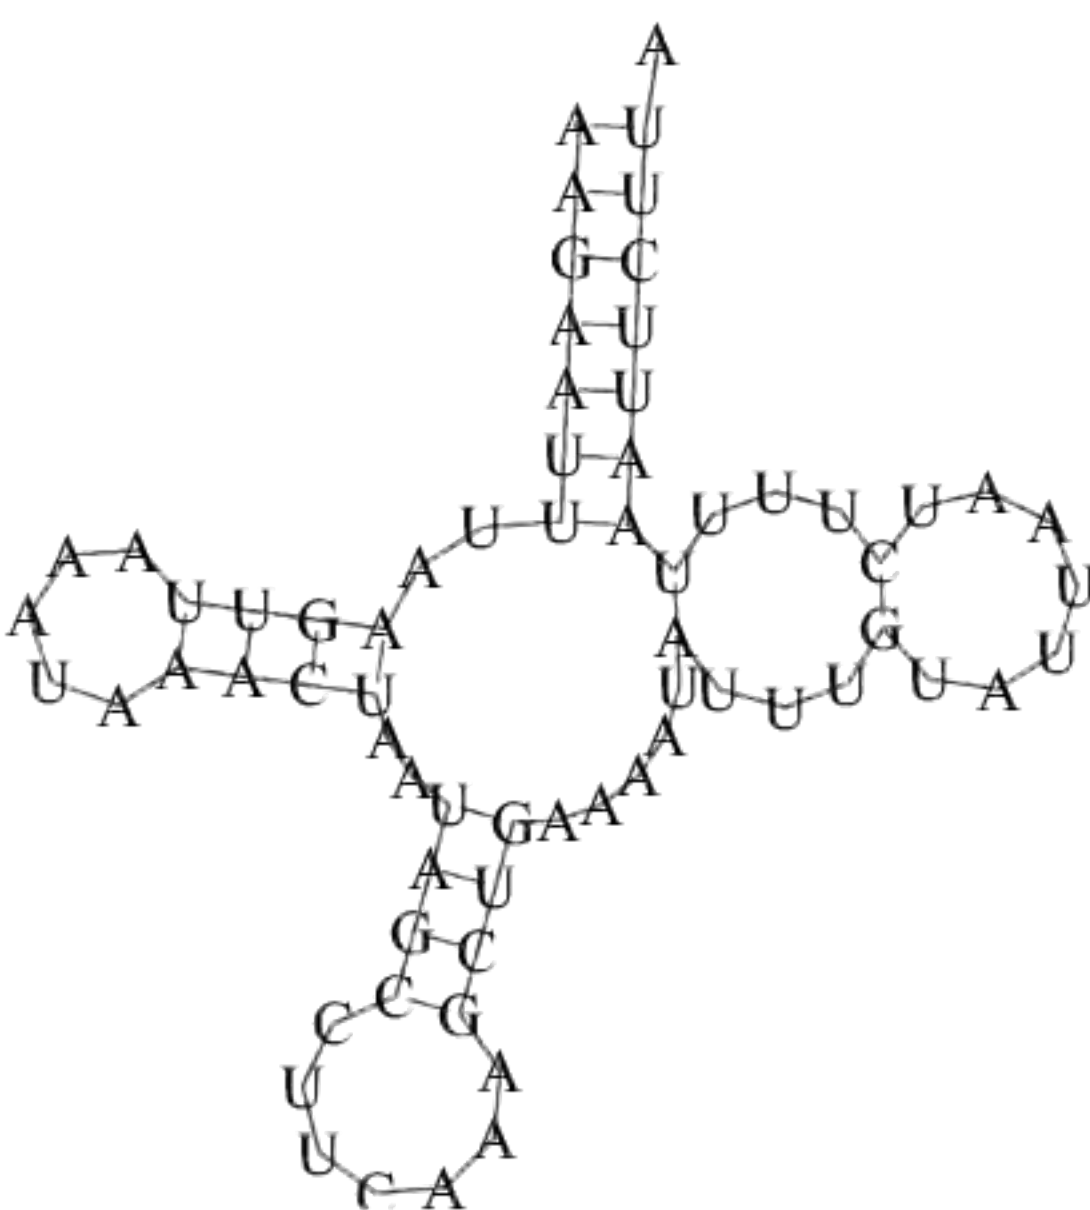

Tyrosine(gua)

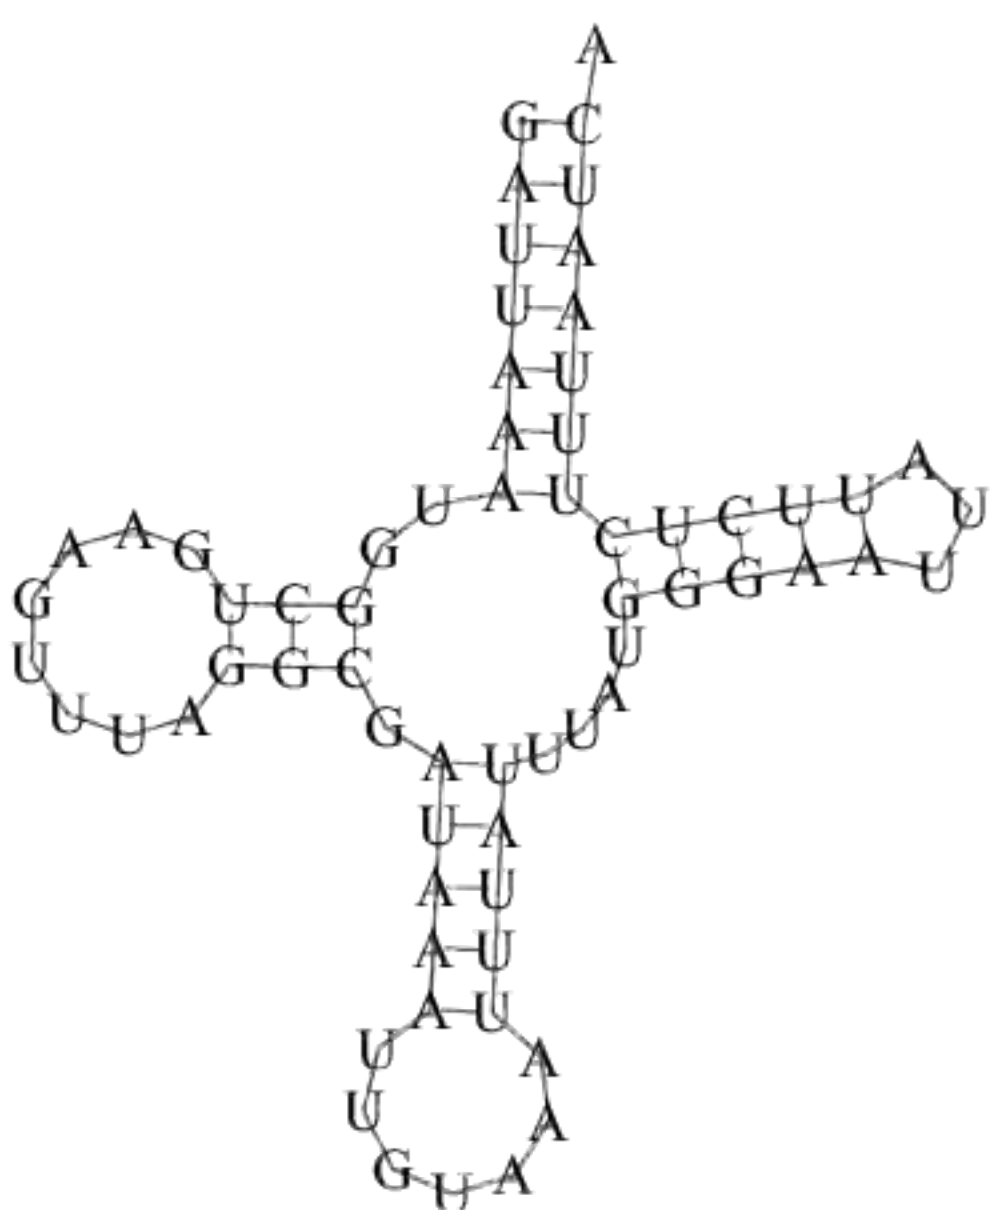

Valine(uac)

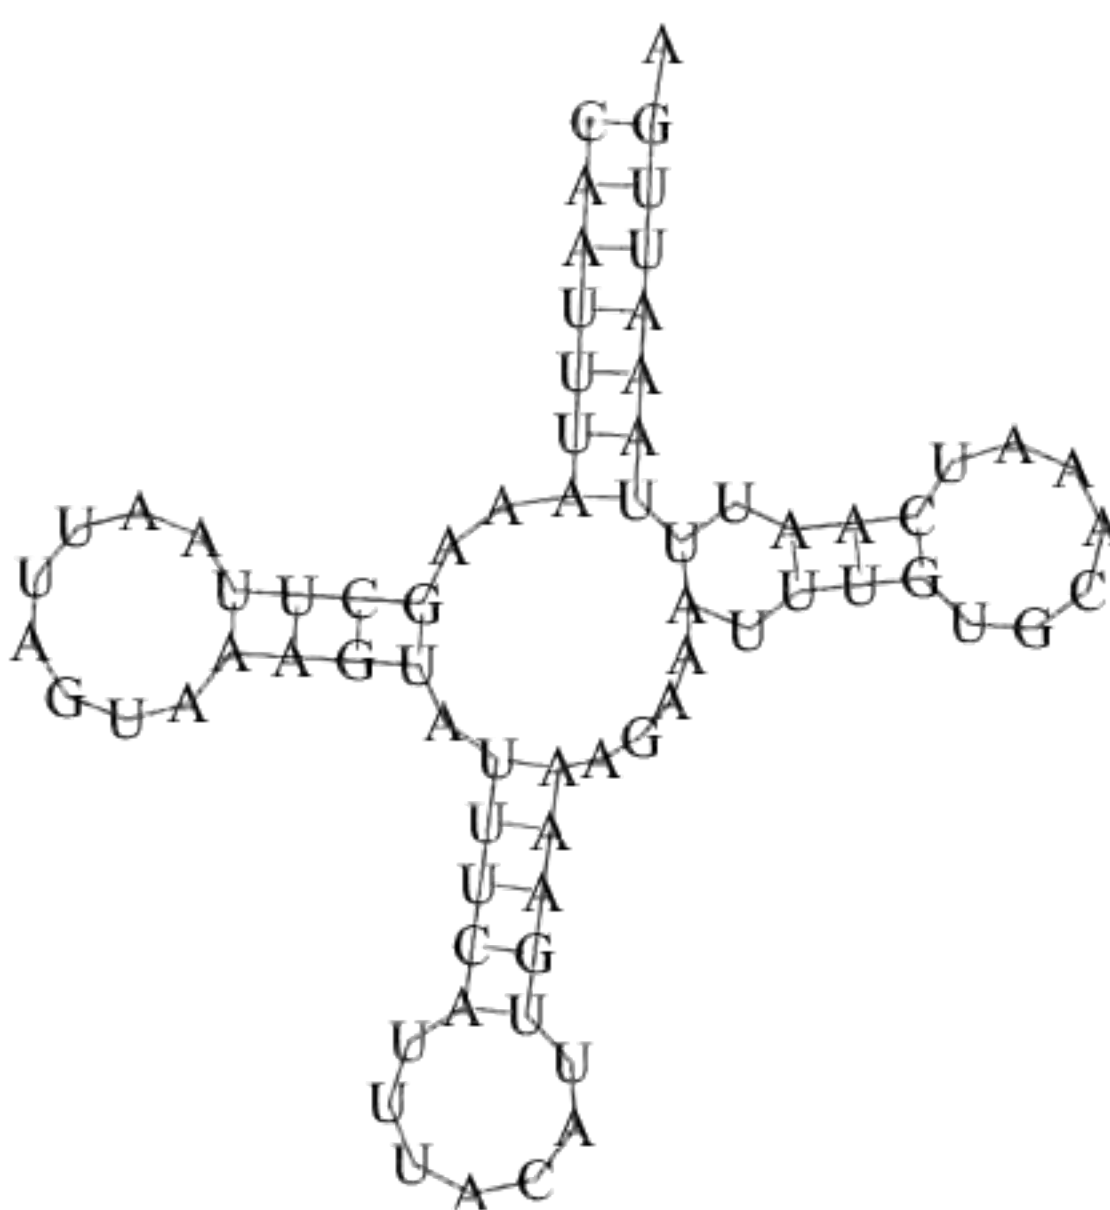



*An. liangshanensis*

Alanine(ugc)

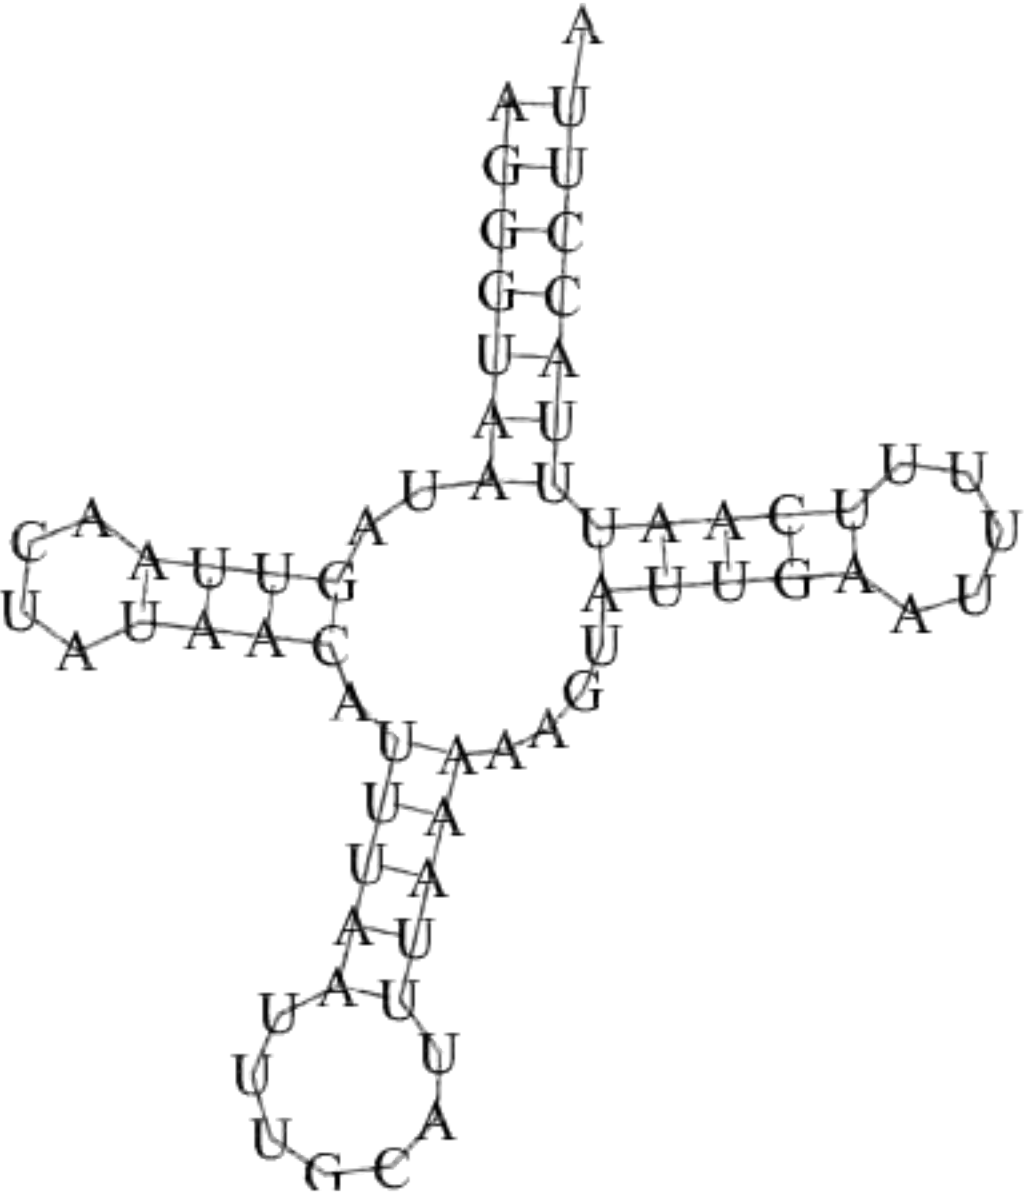

Arginine(ucg)

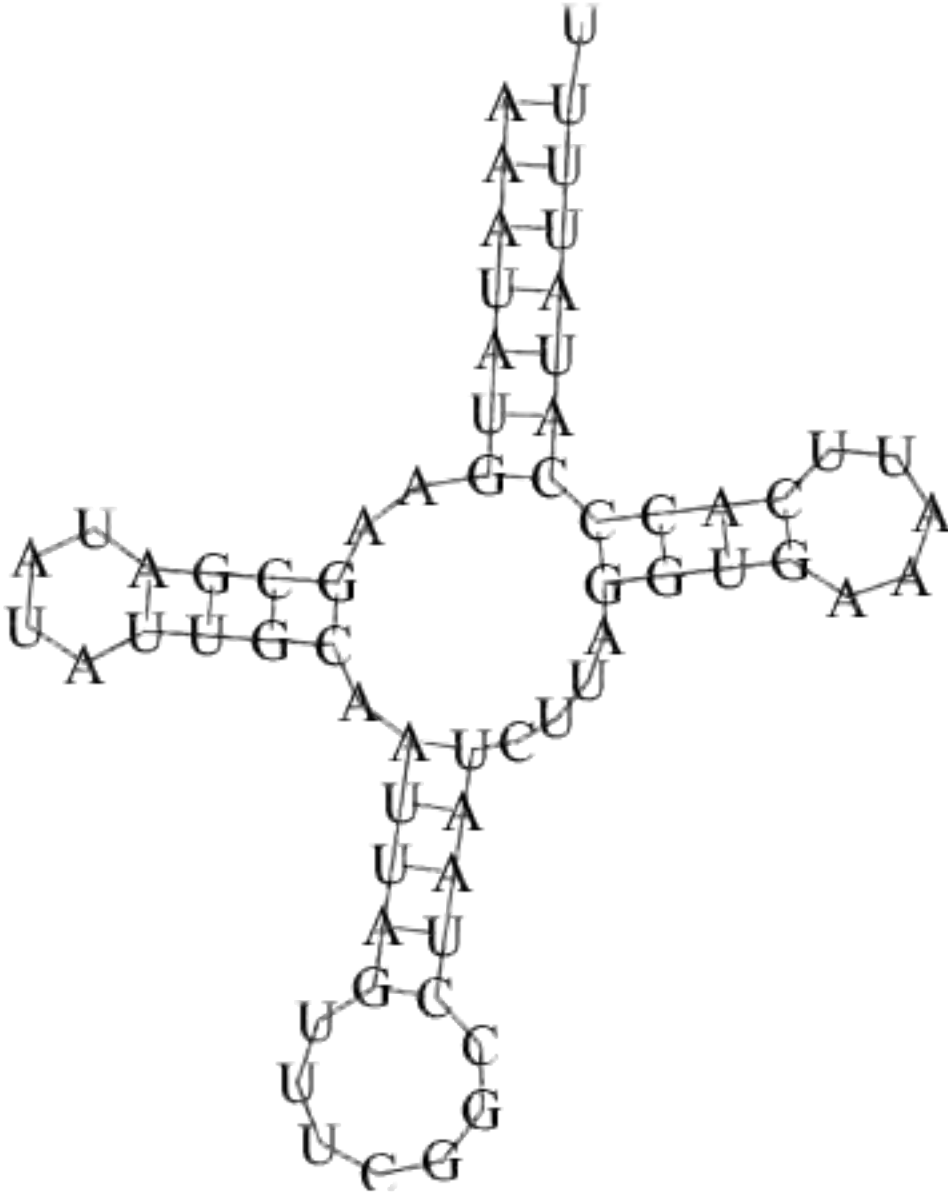

Asparagine(guu)

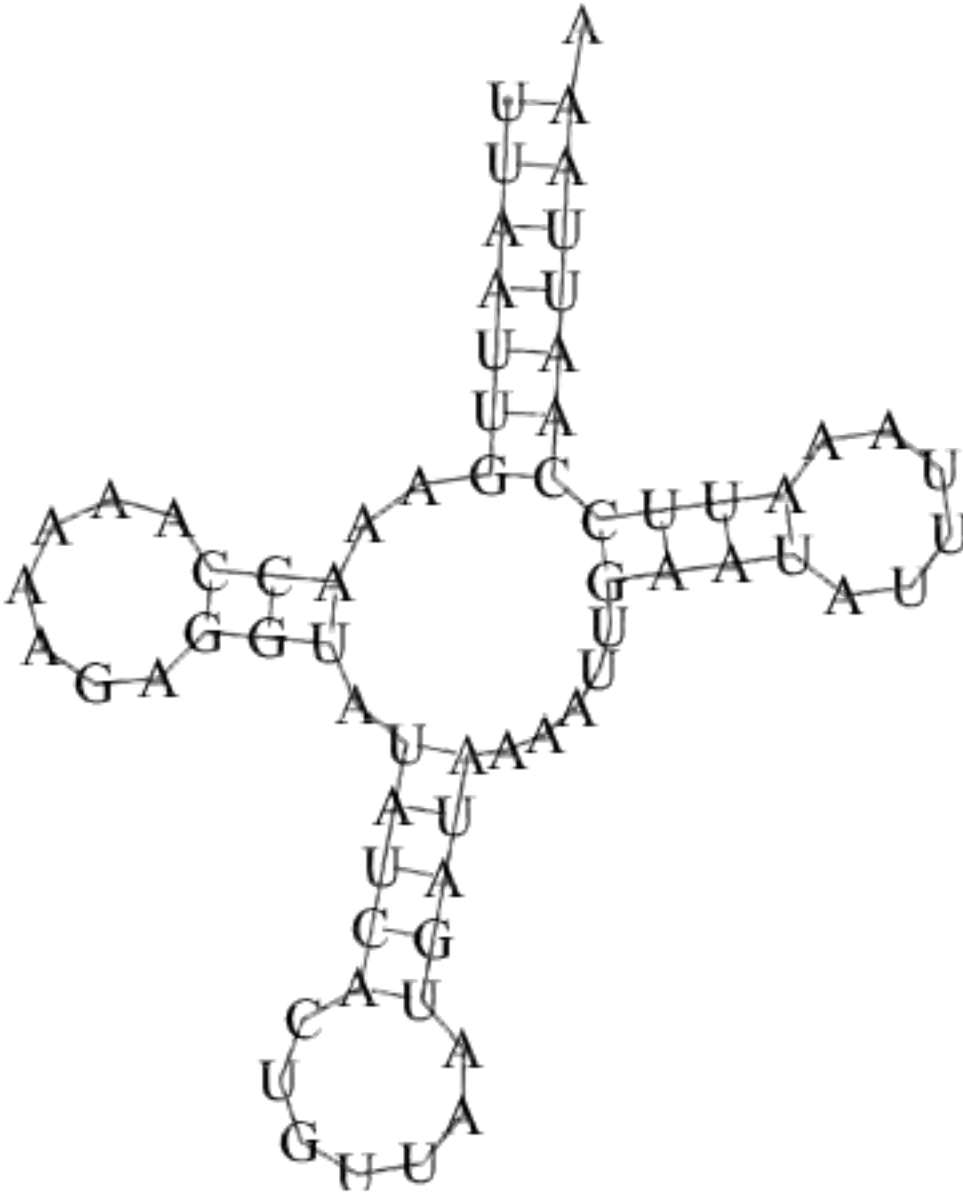

Aspartic acid(guc)

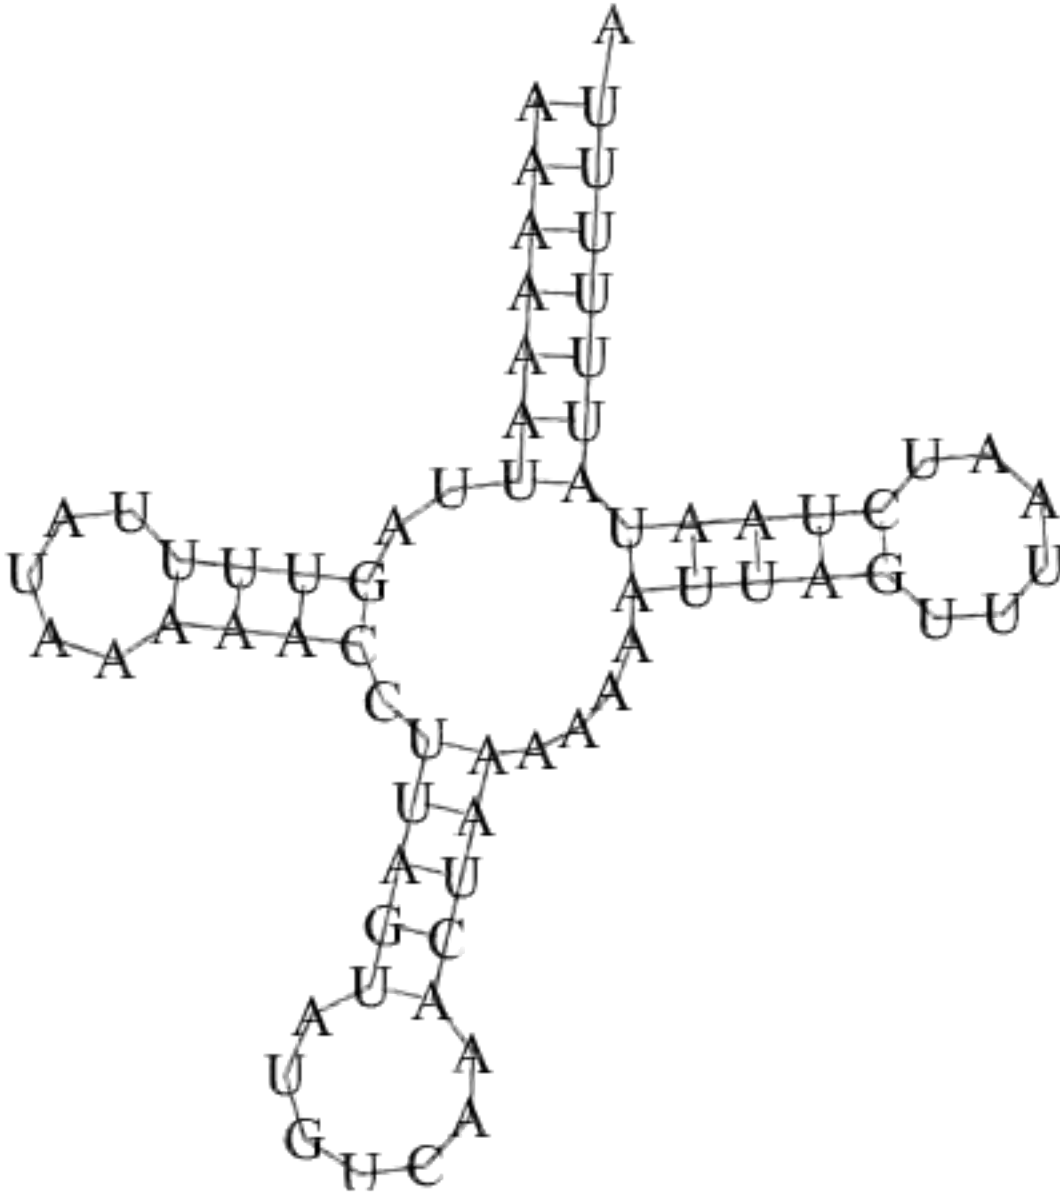

Cysteine(gca)

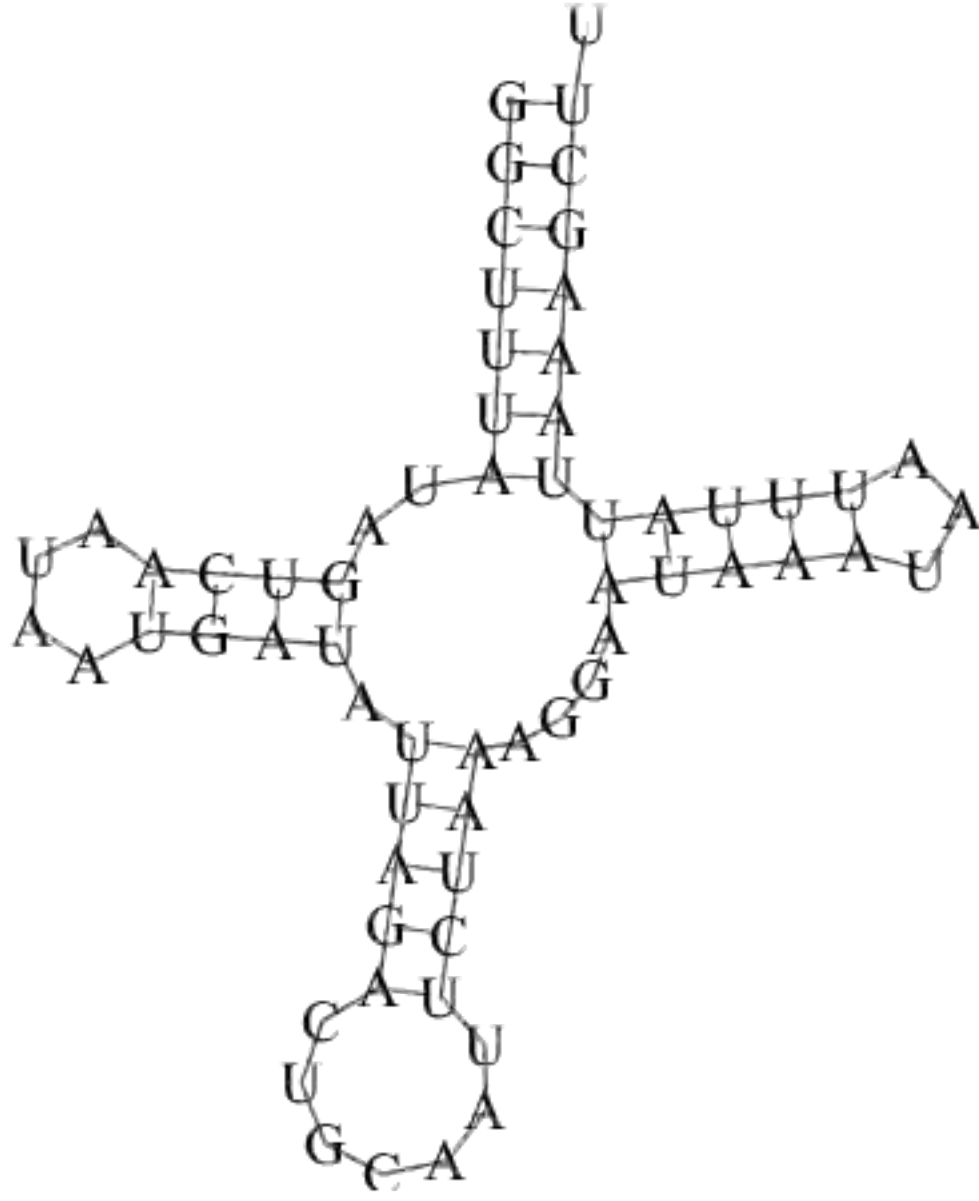

Glutamine(uuc)

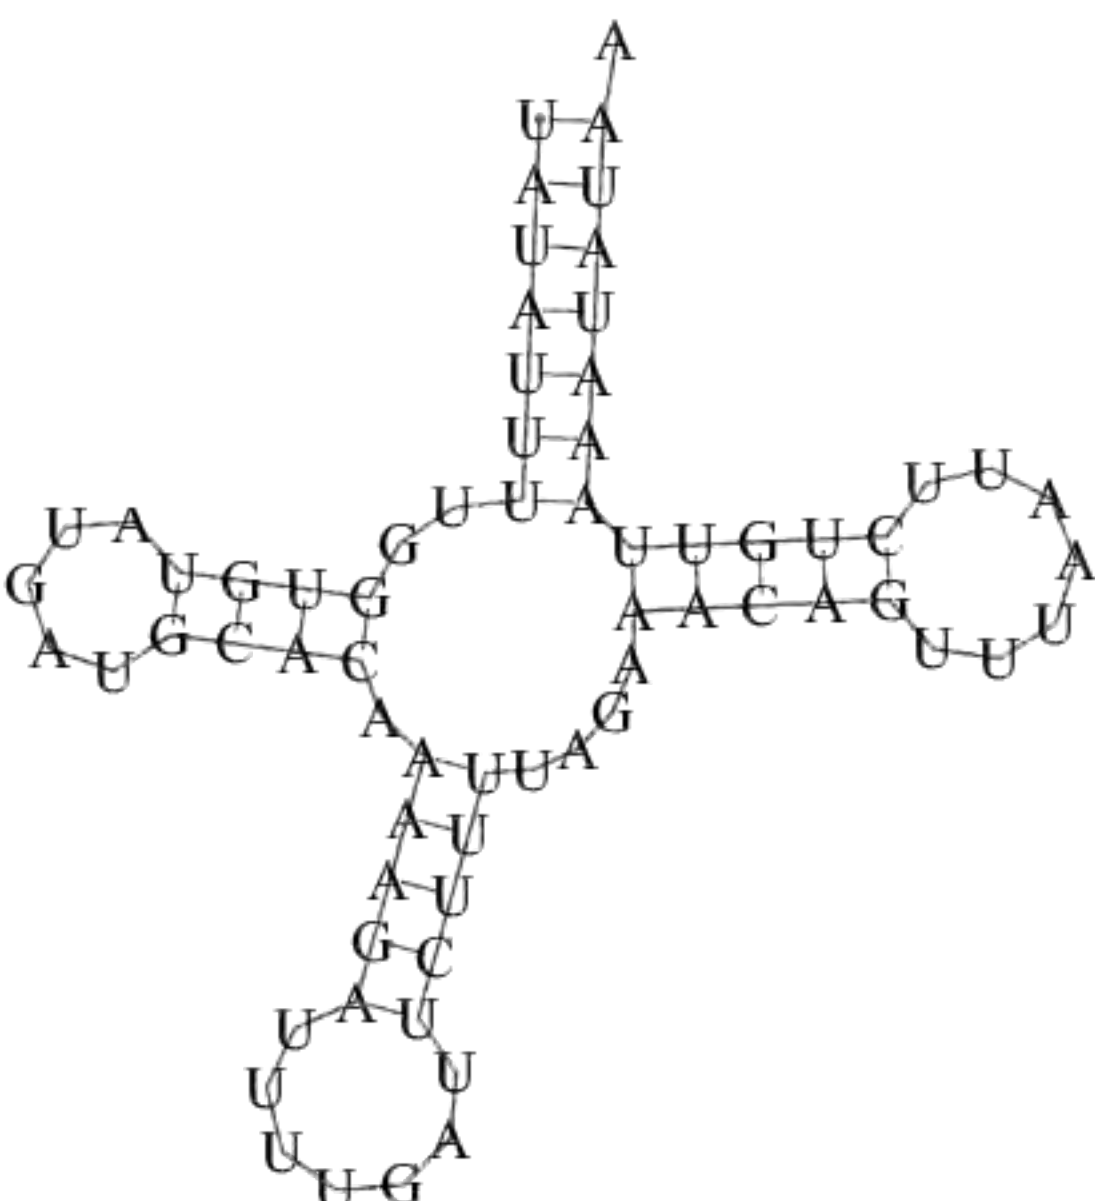

Glutamic acid(uug)

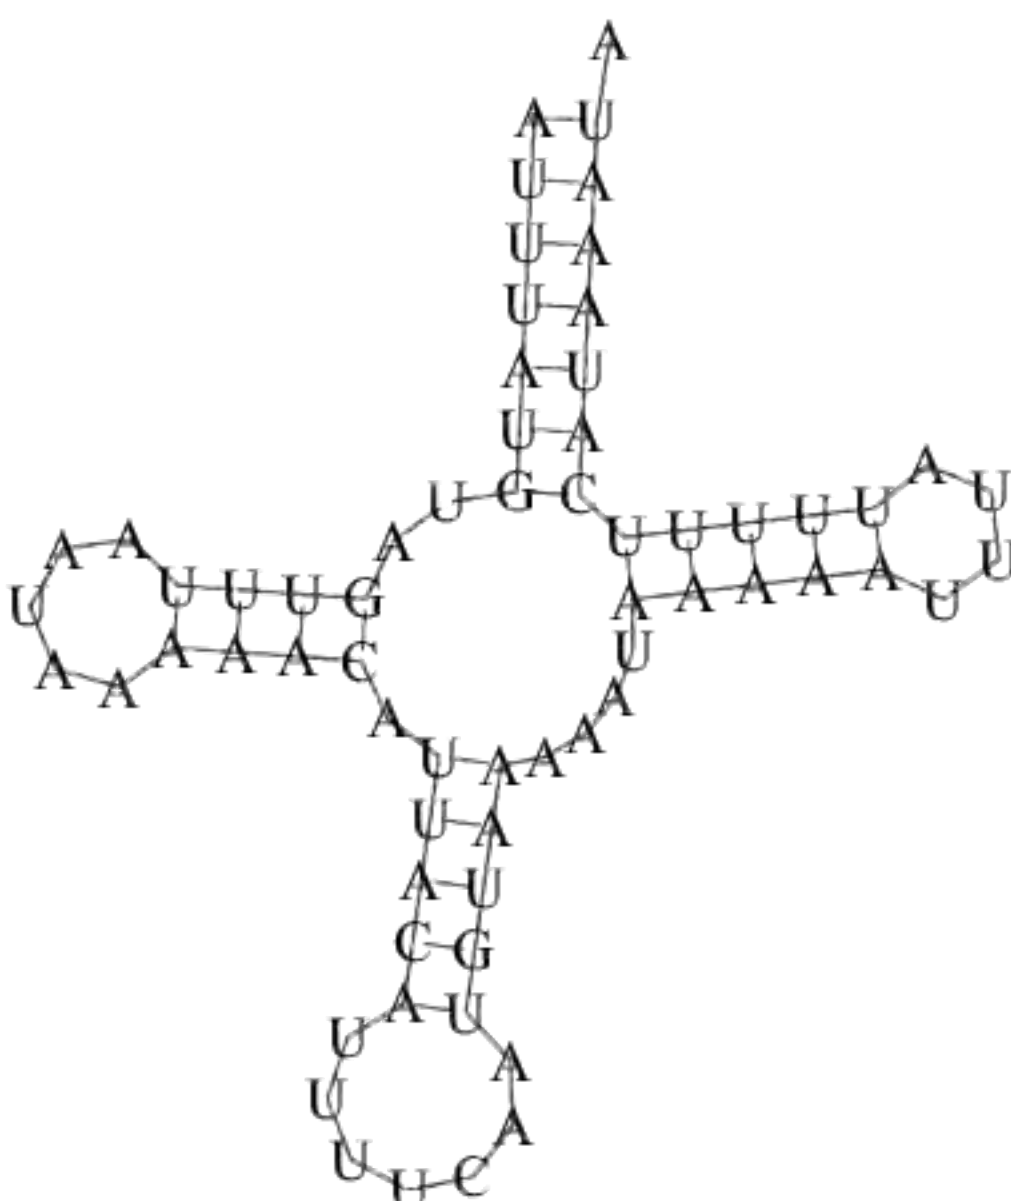

Glycine(ucc)

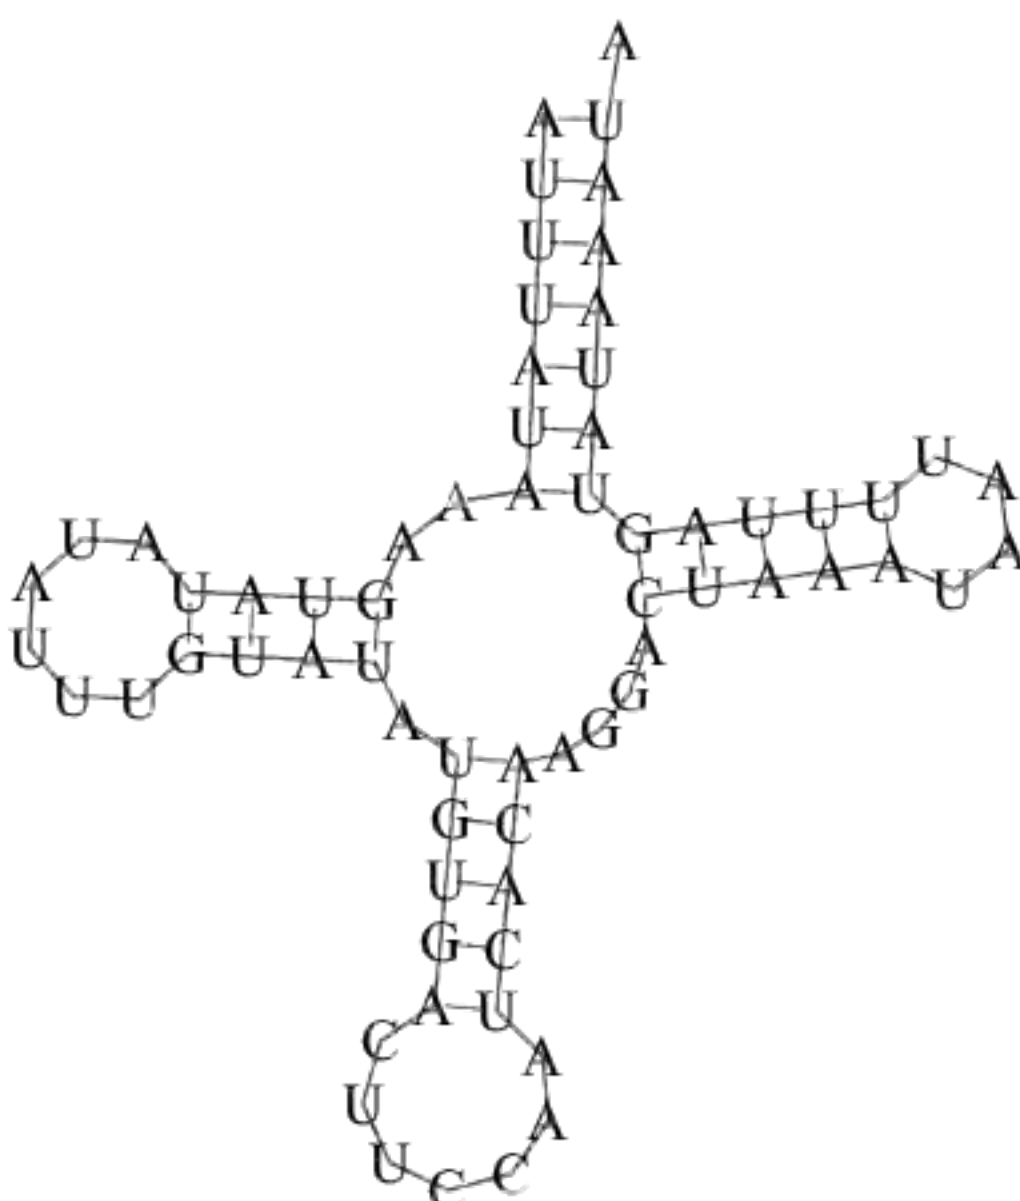

Histidine(gug)

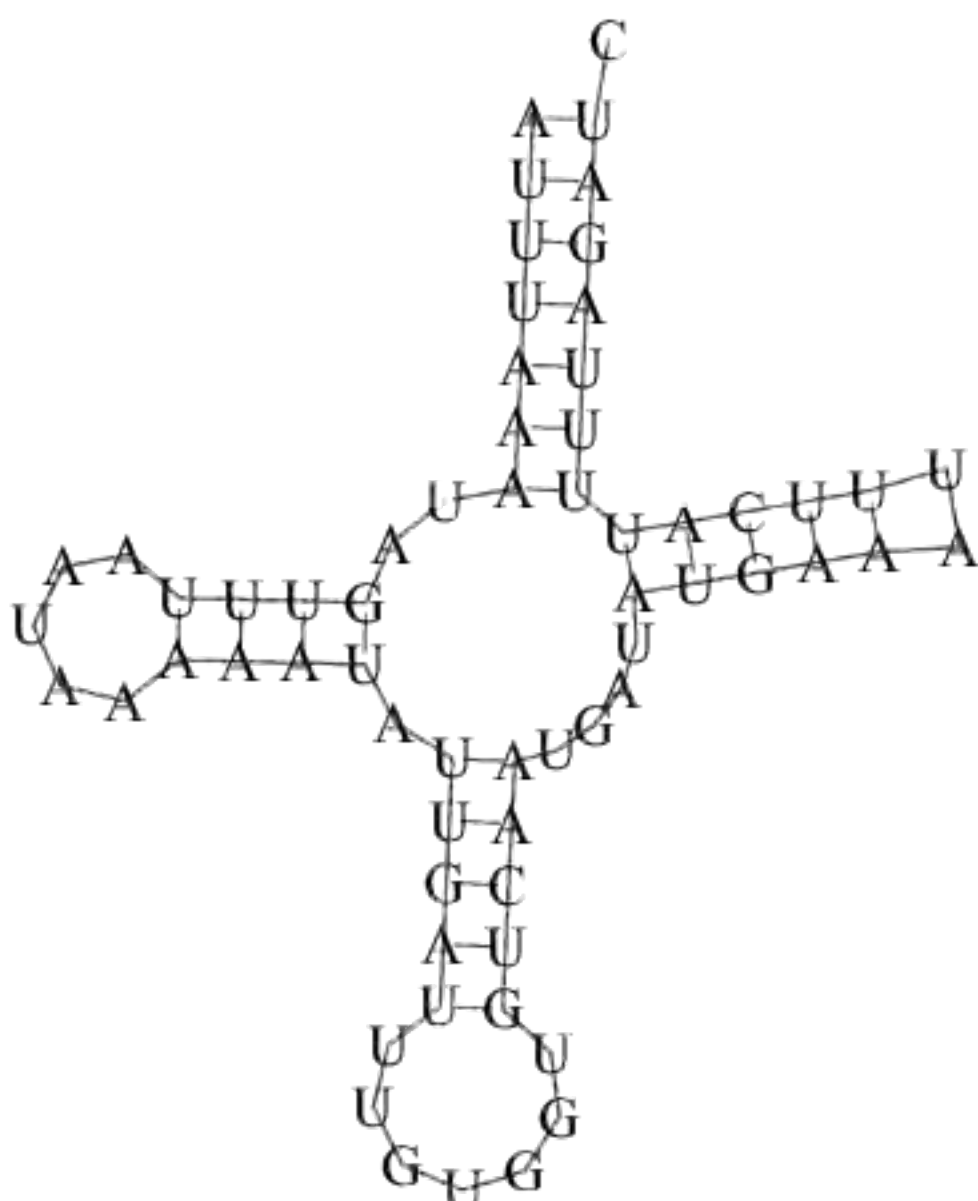

Isoleucine(gau)

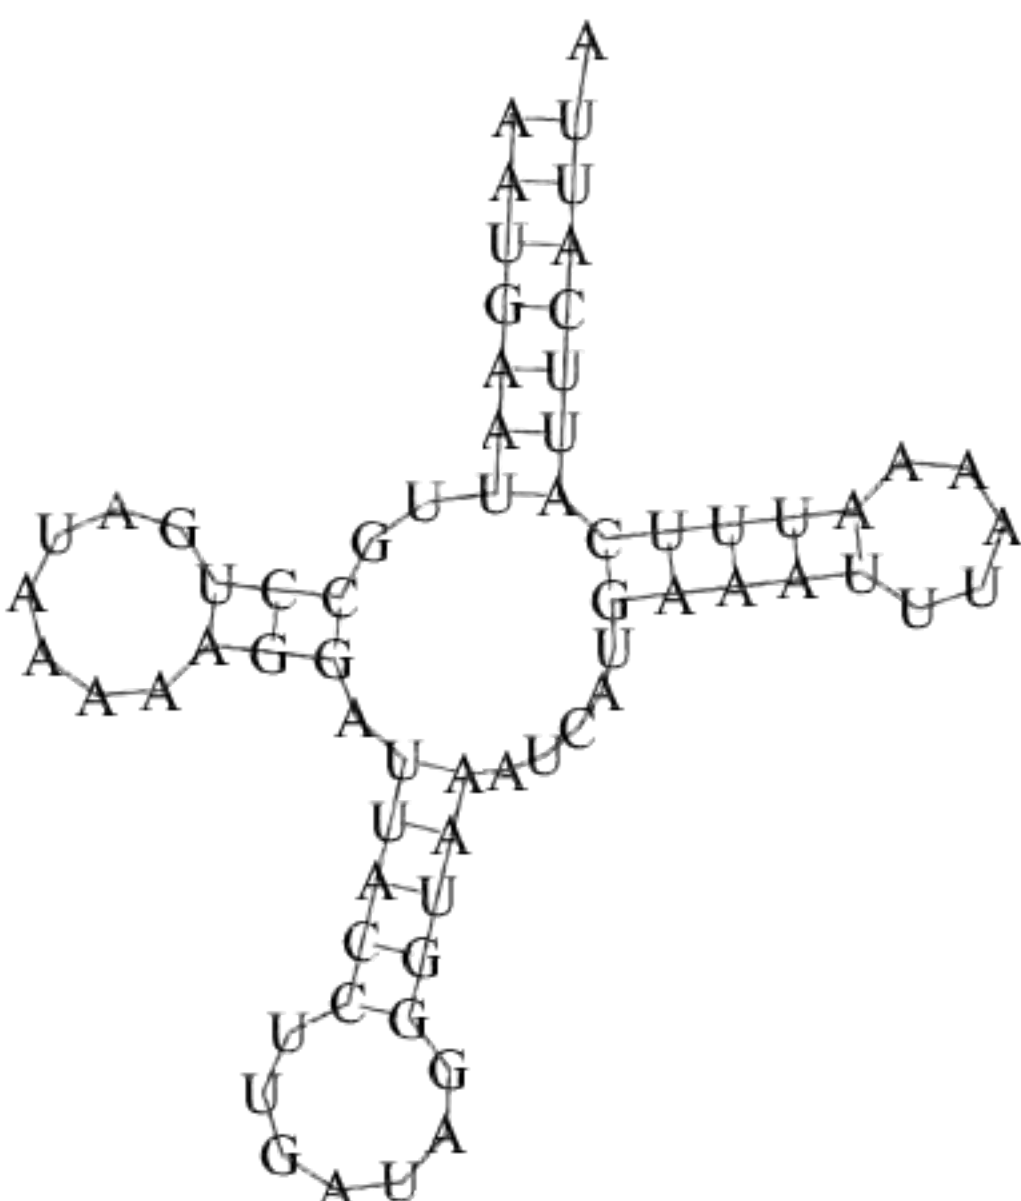

Leucine(uag)

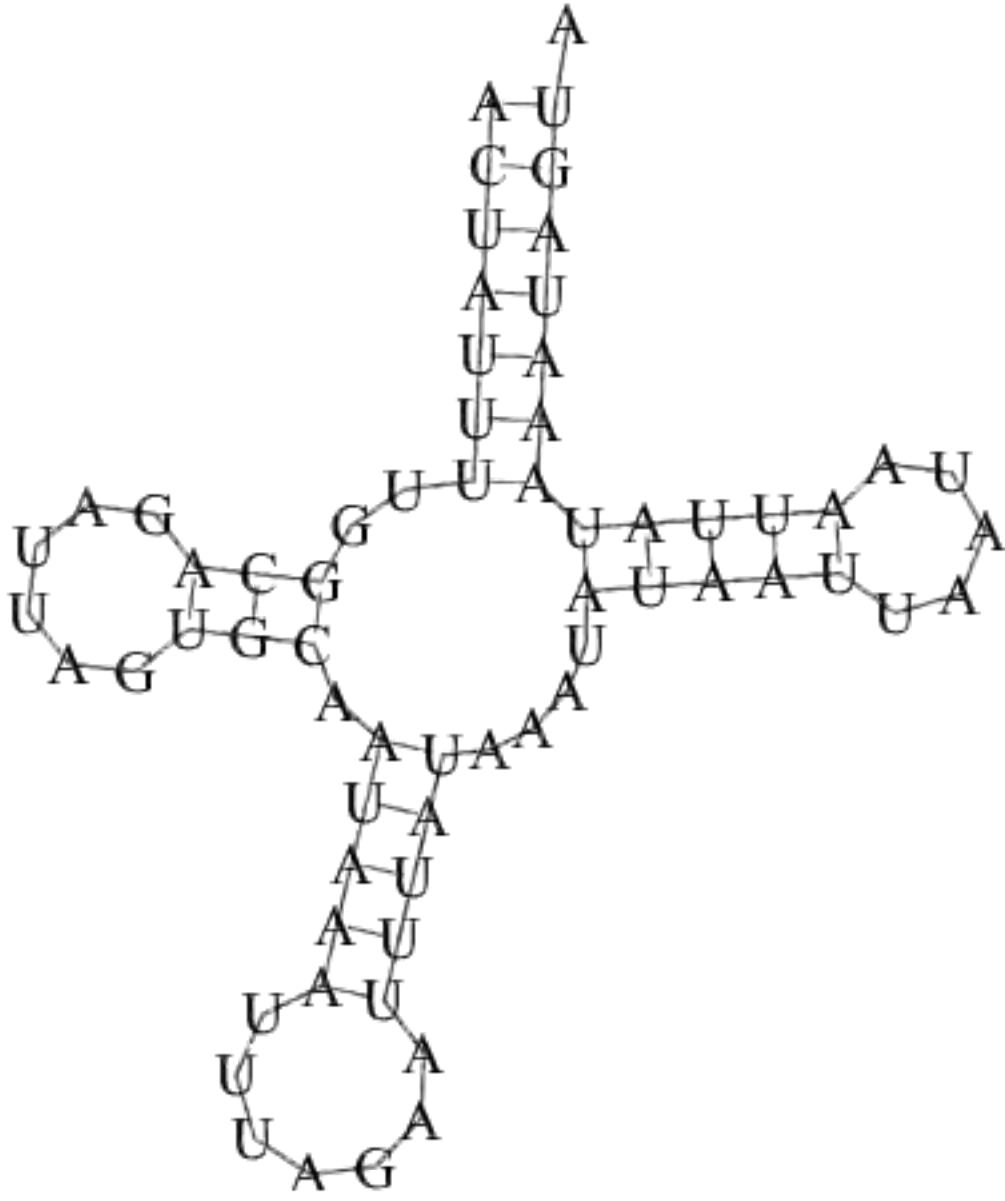

Leucine(uaa)

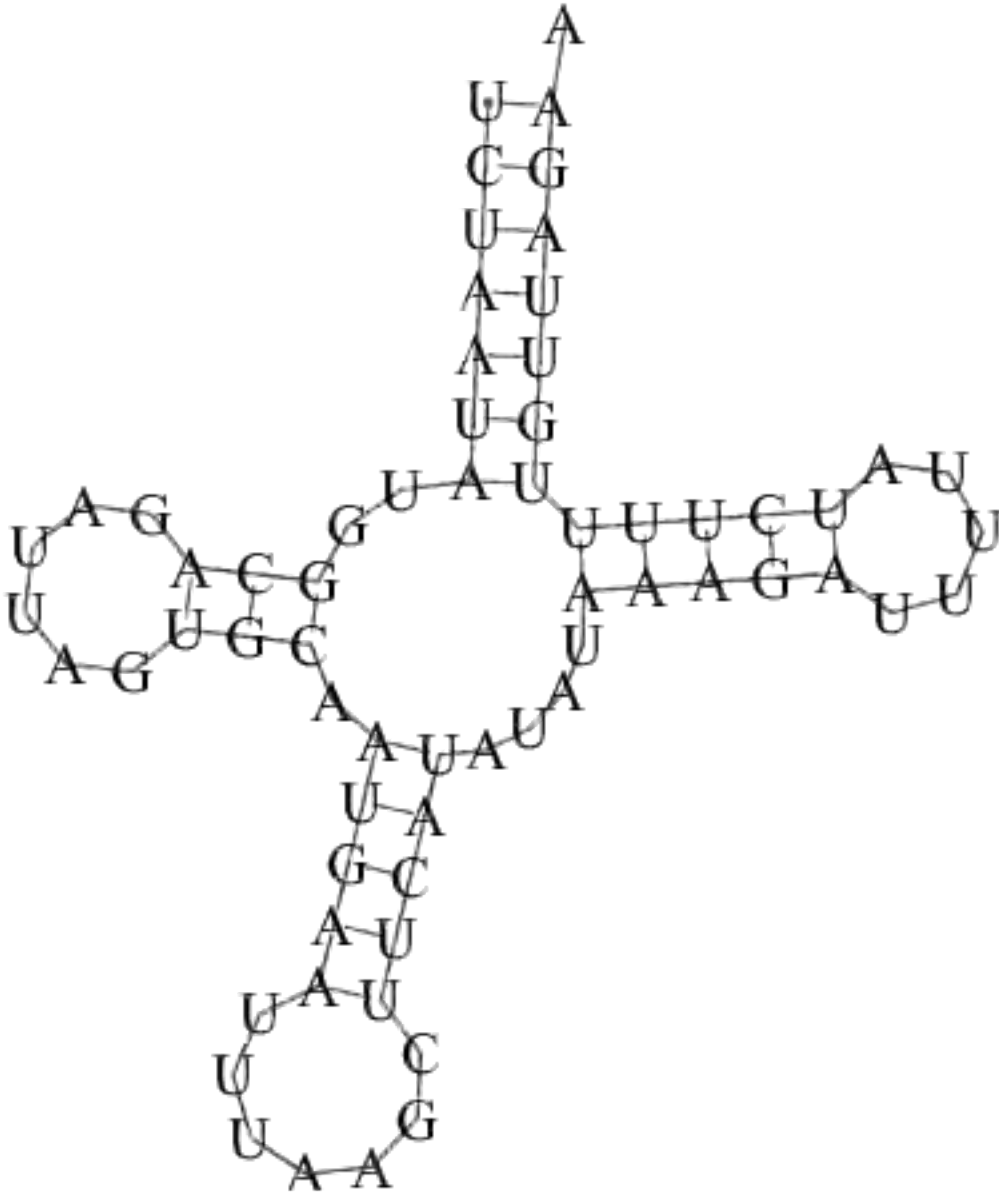

Lysine(cuu)

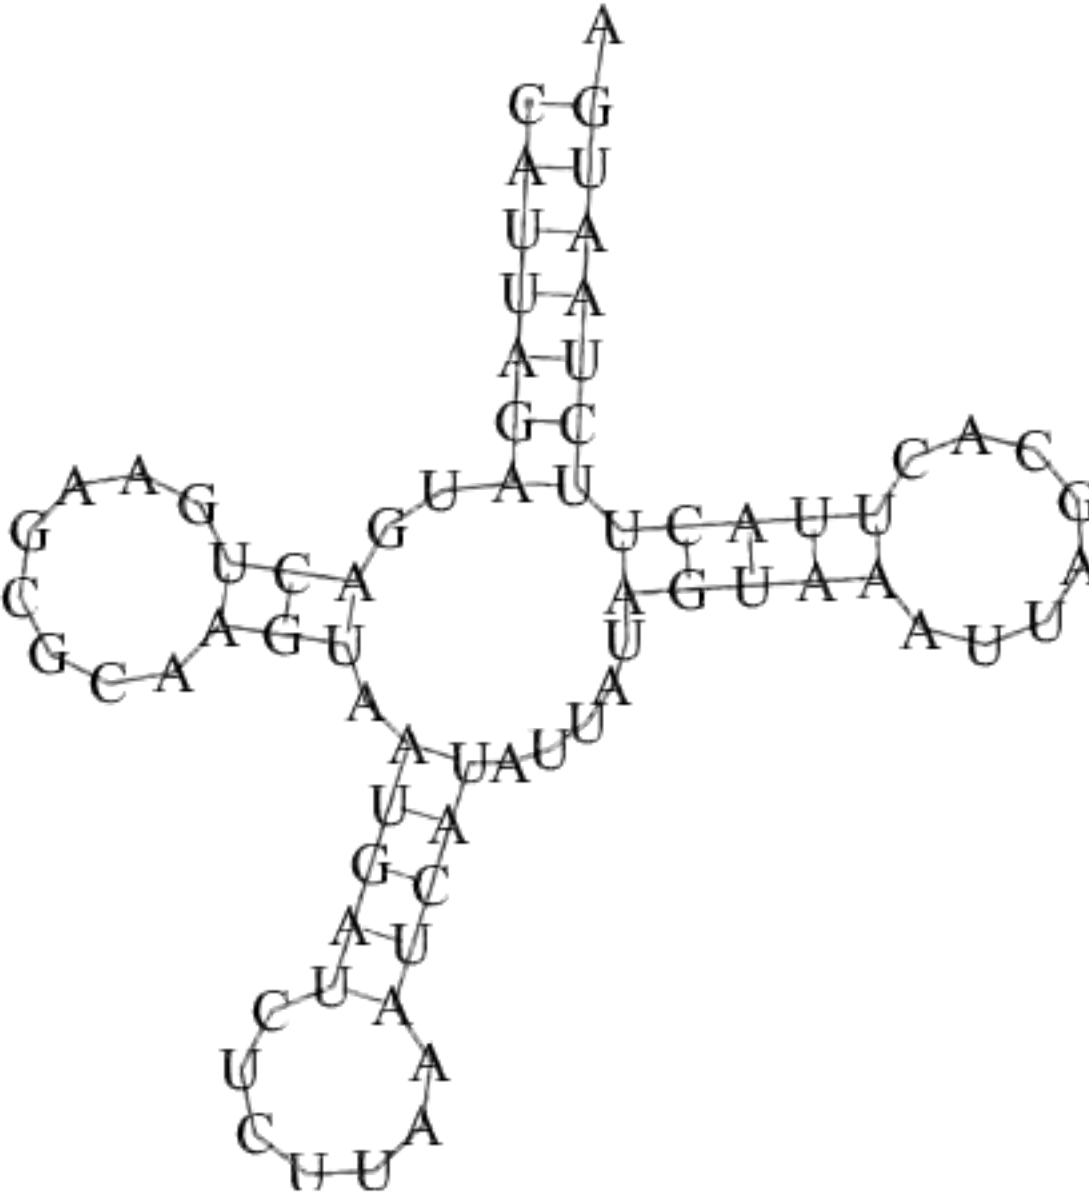

Methionine(cau)

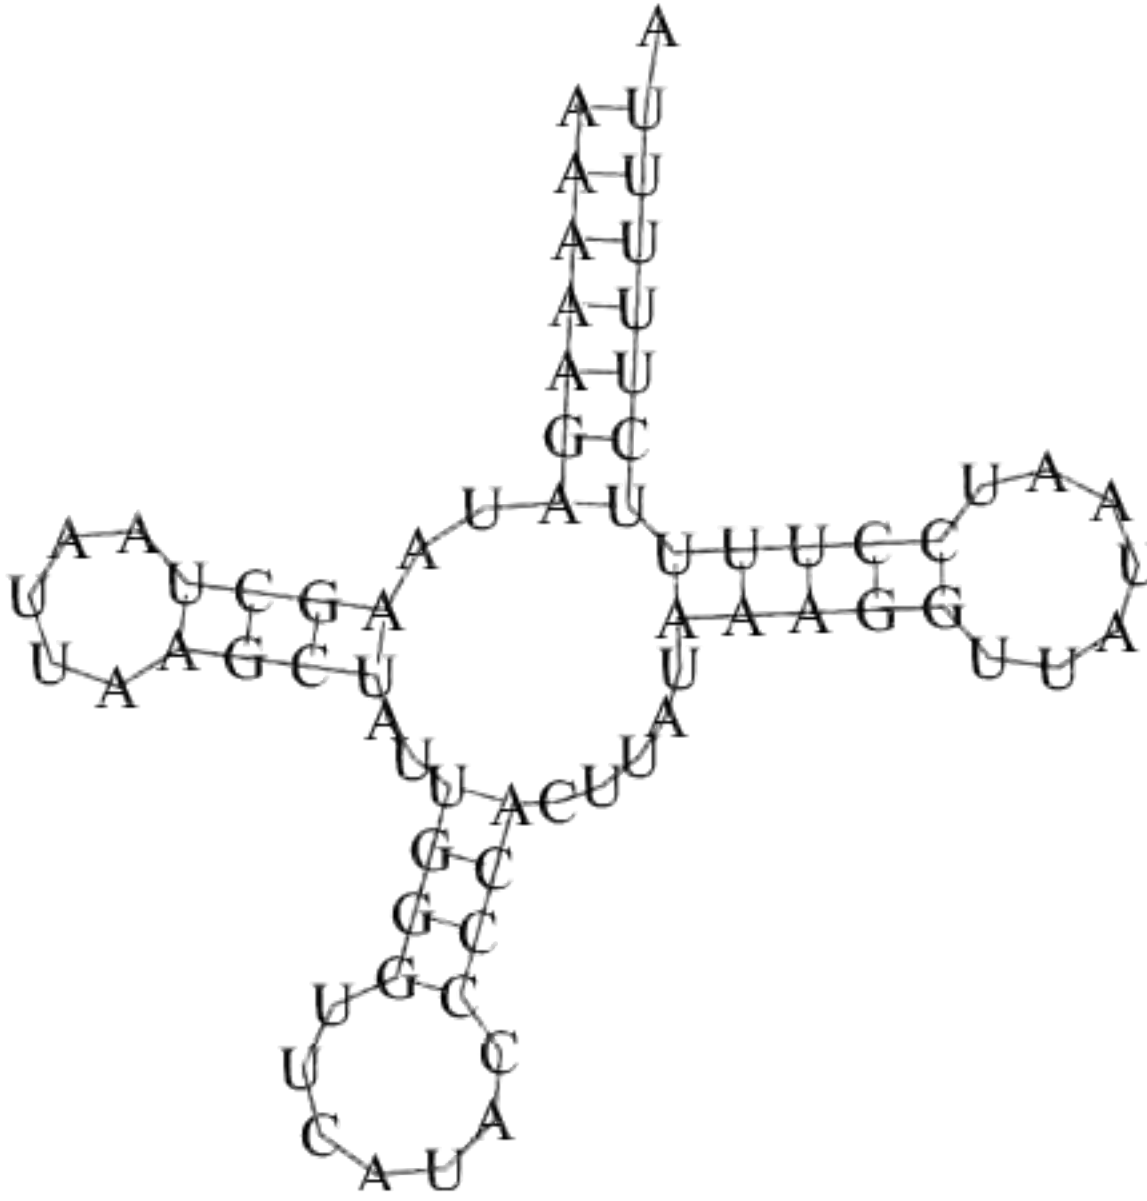

Phenylalanine(gaa)

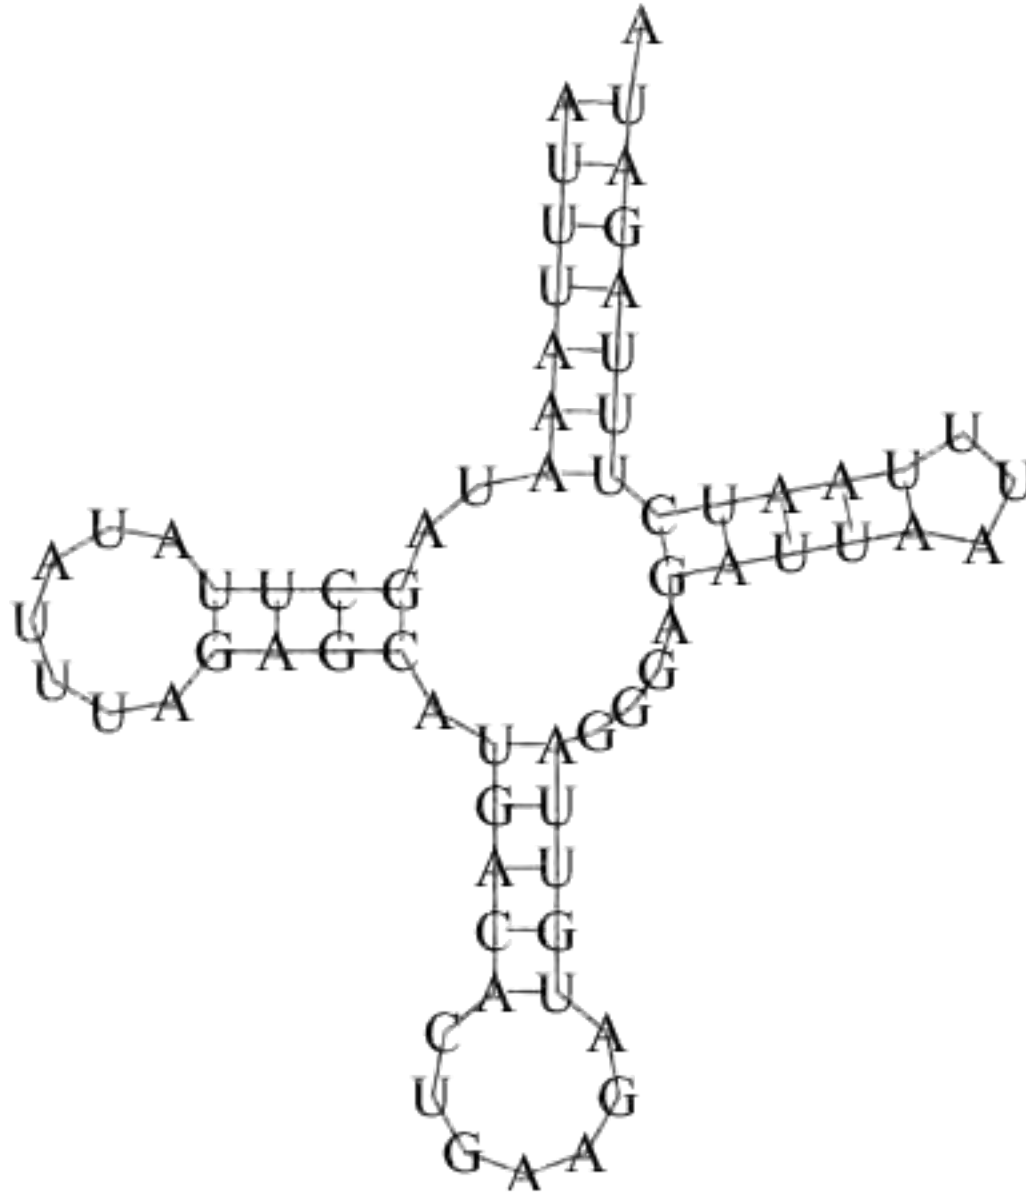

Proline(ugg)

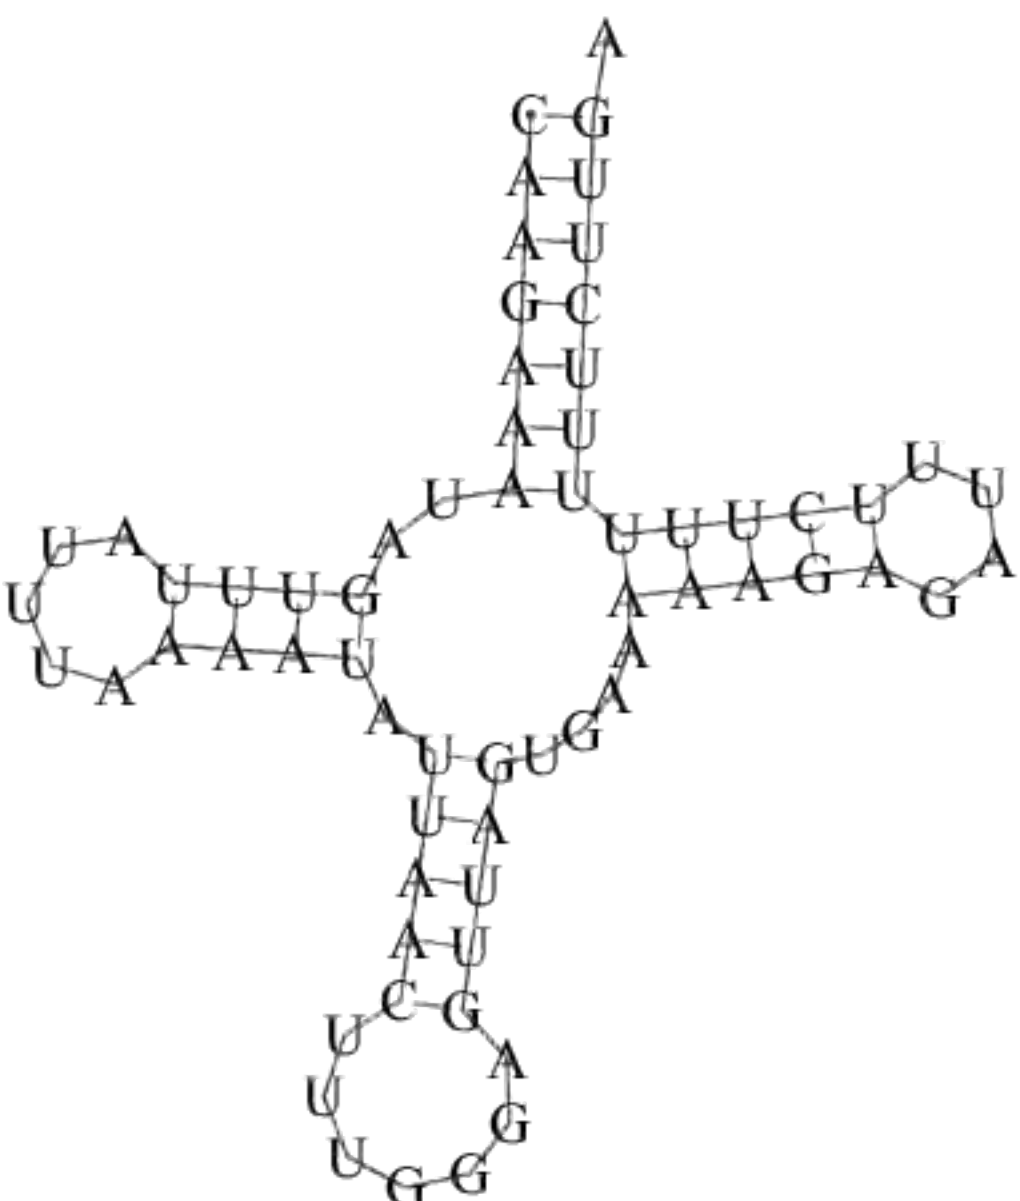

Serine(gcu)

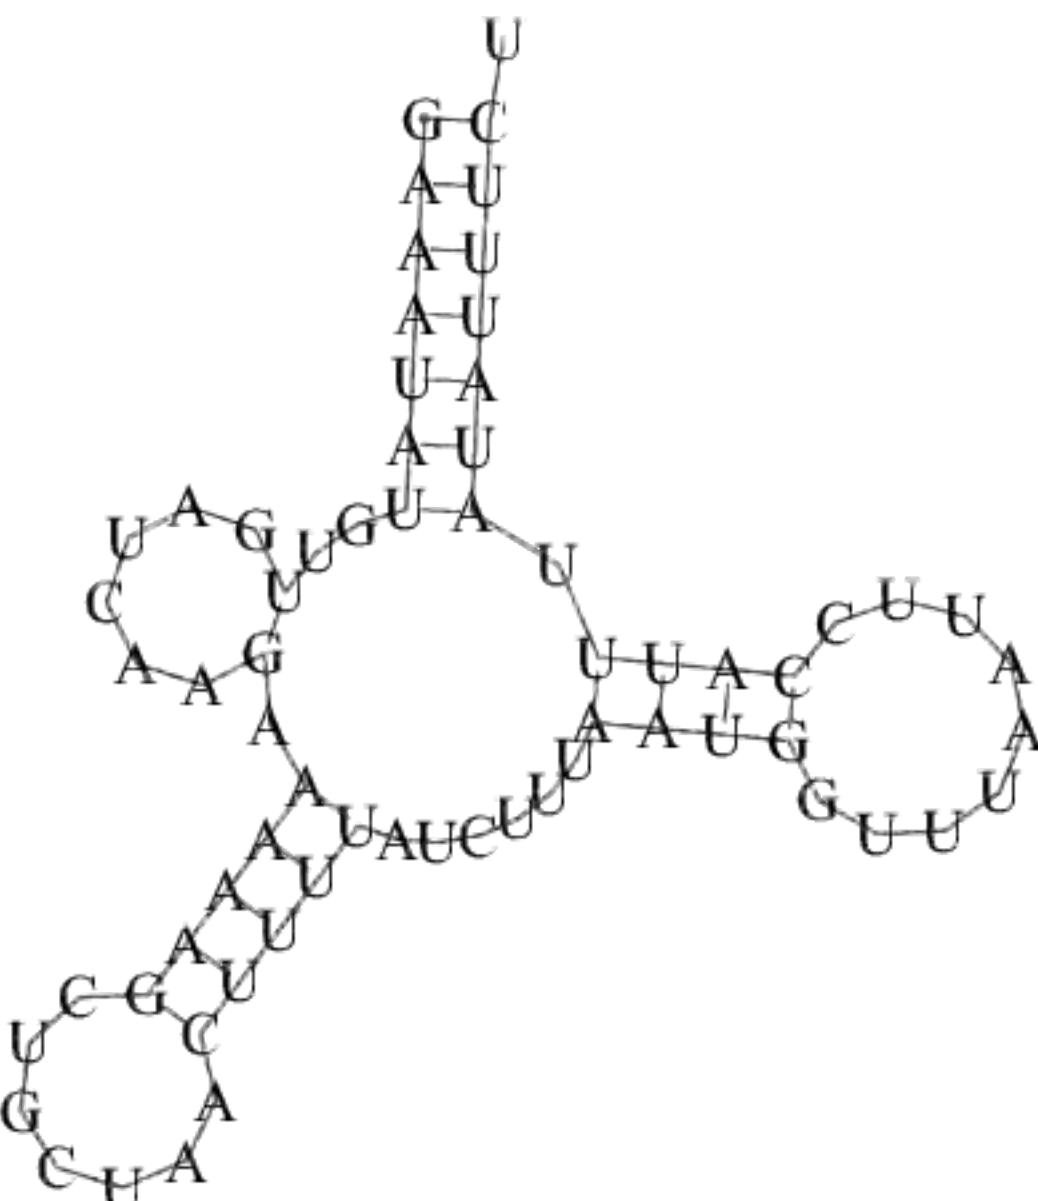

Serine(uga)

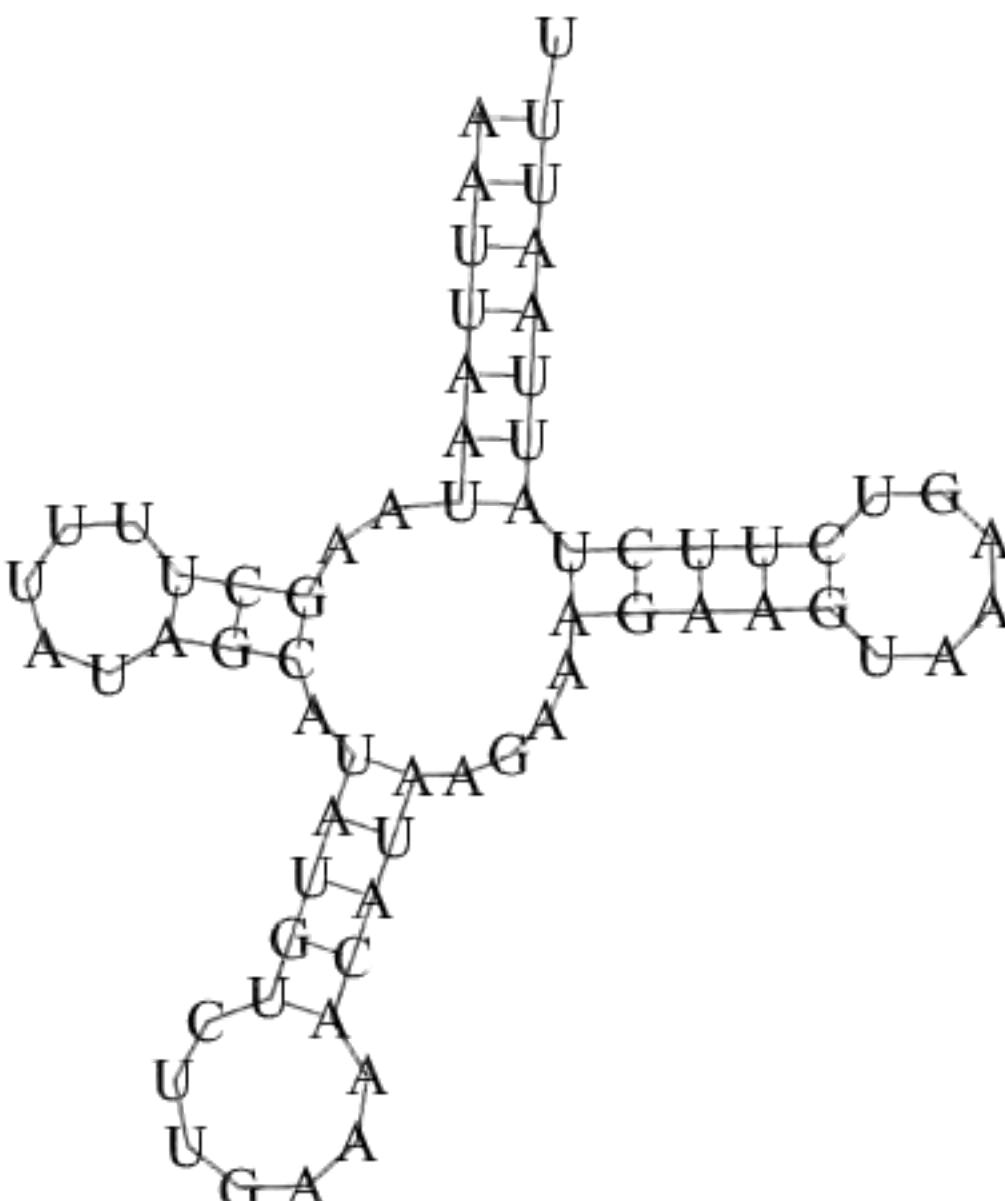

Threonine(ugu)

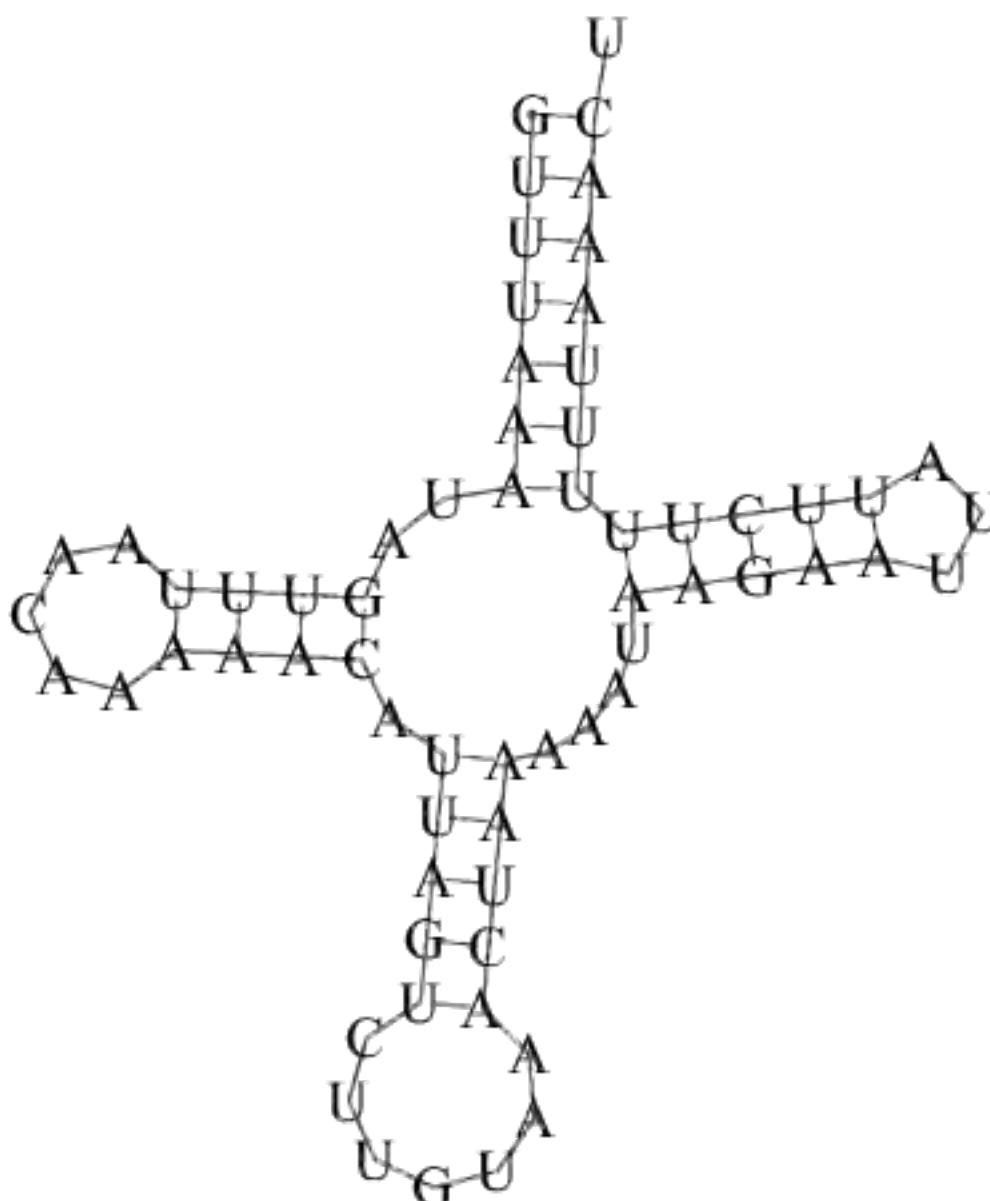

Tryptophan(uca)

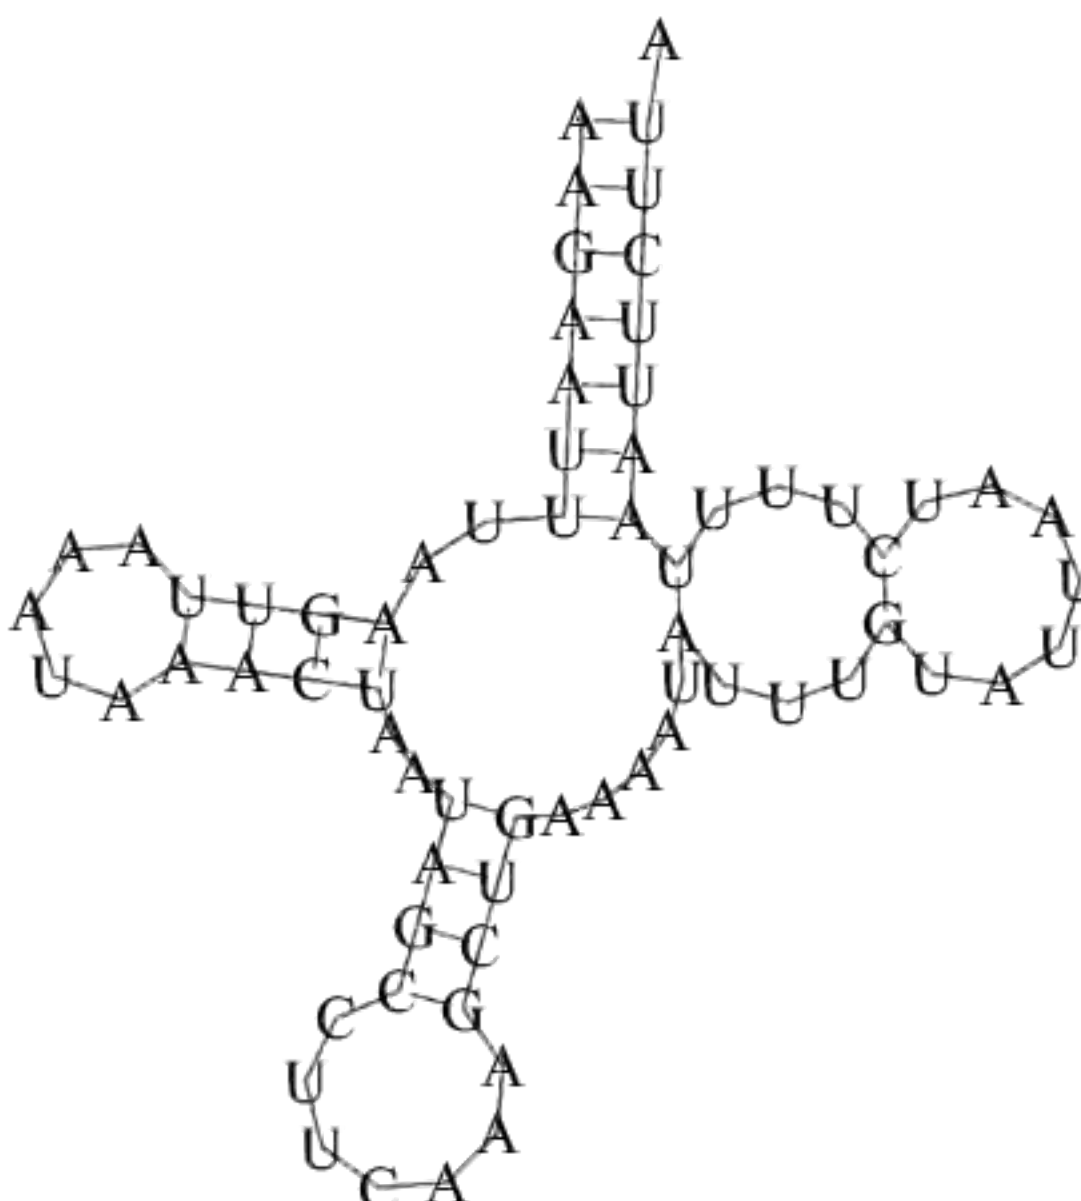

Tyrosine(gua)

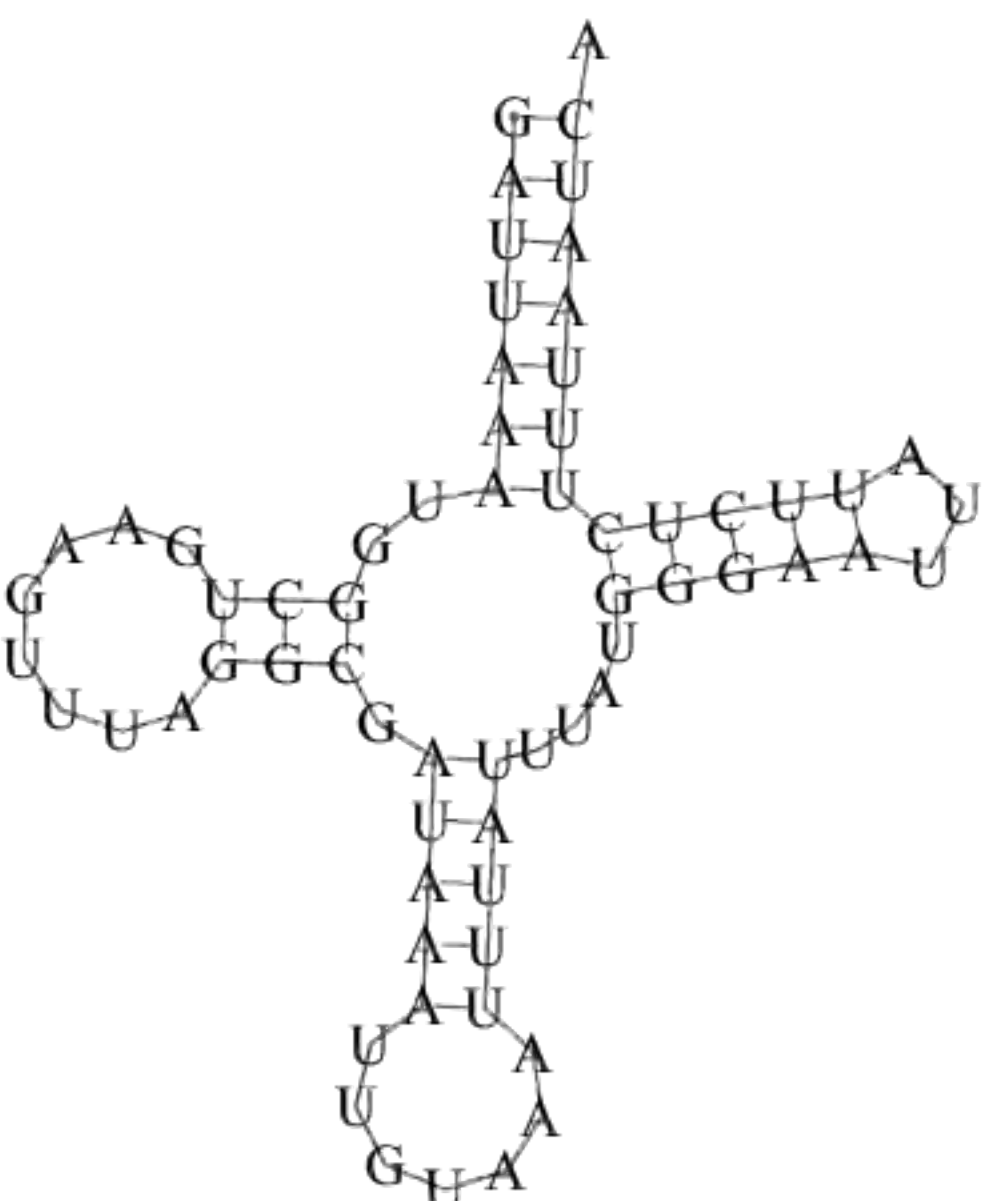

Valine(uac)

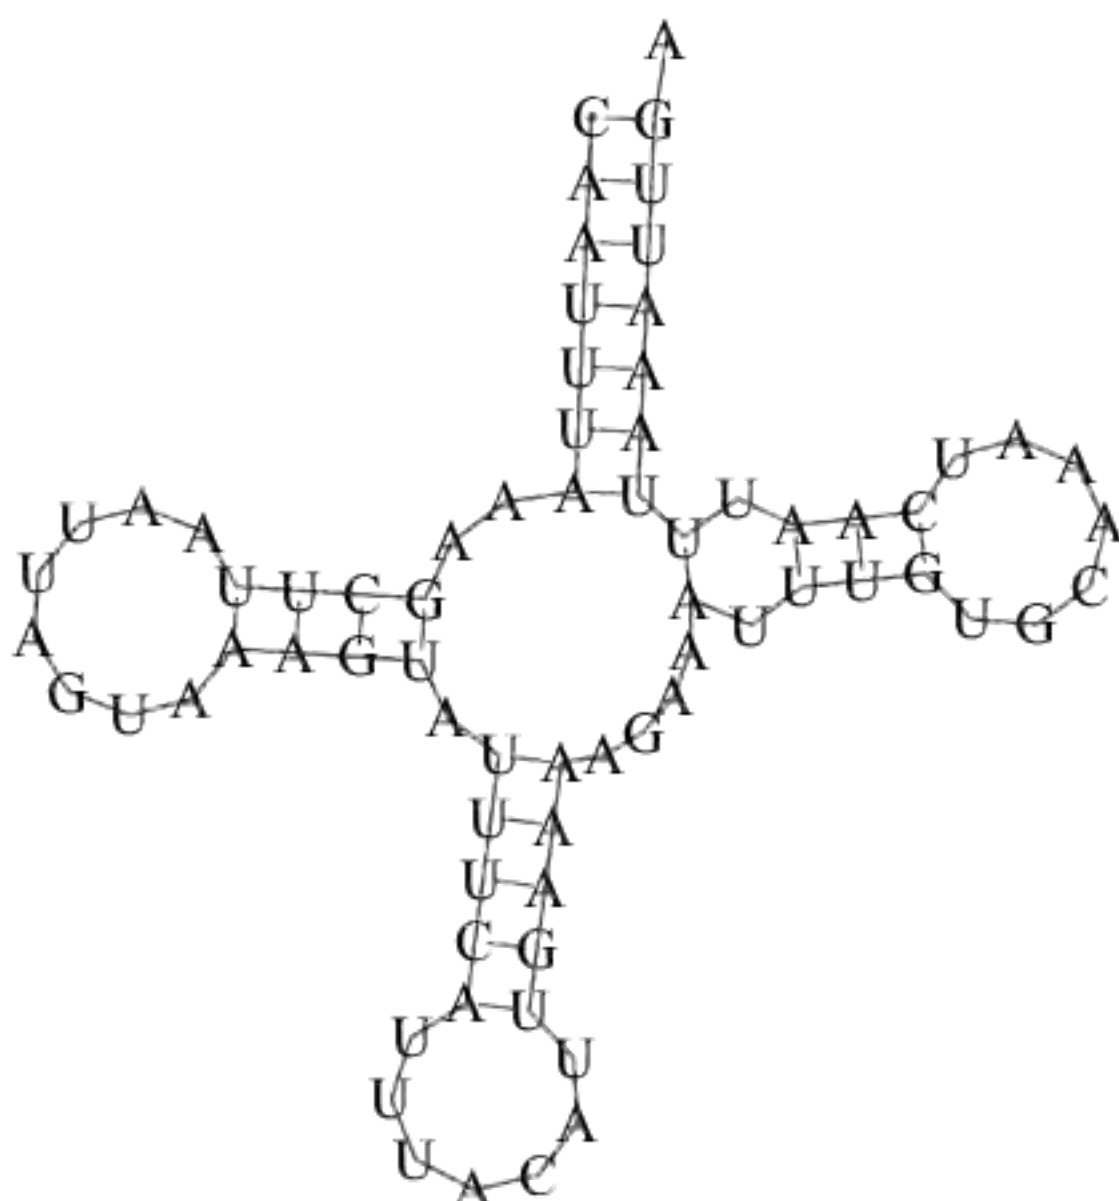



An. peditaeniatus

Alanine(ugc)

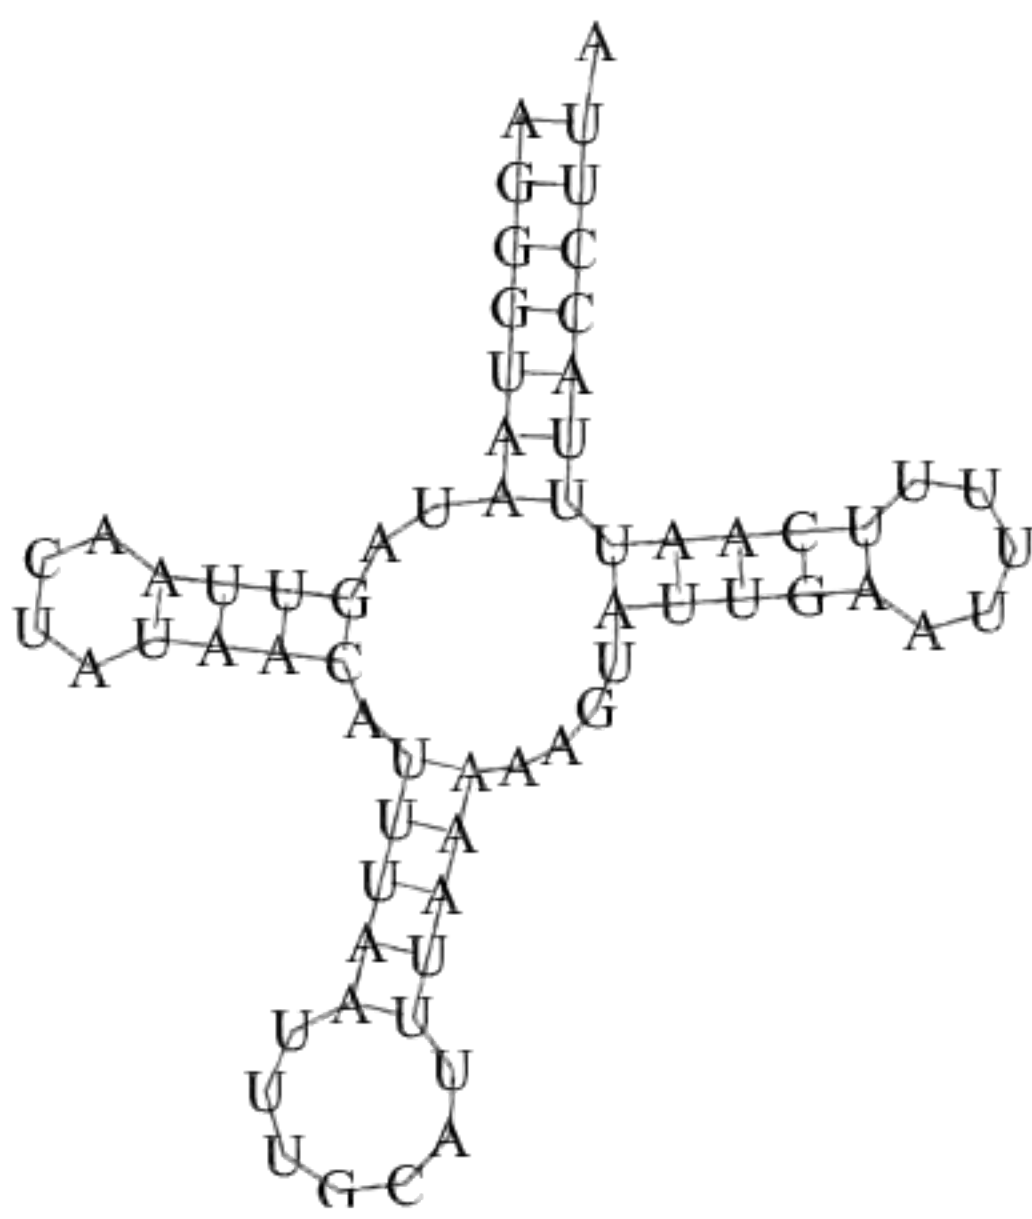

Arginine(ucg)

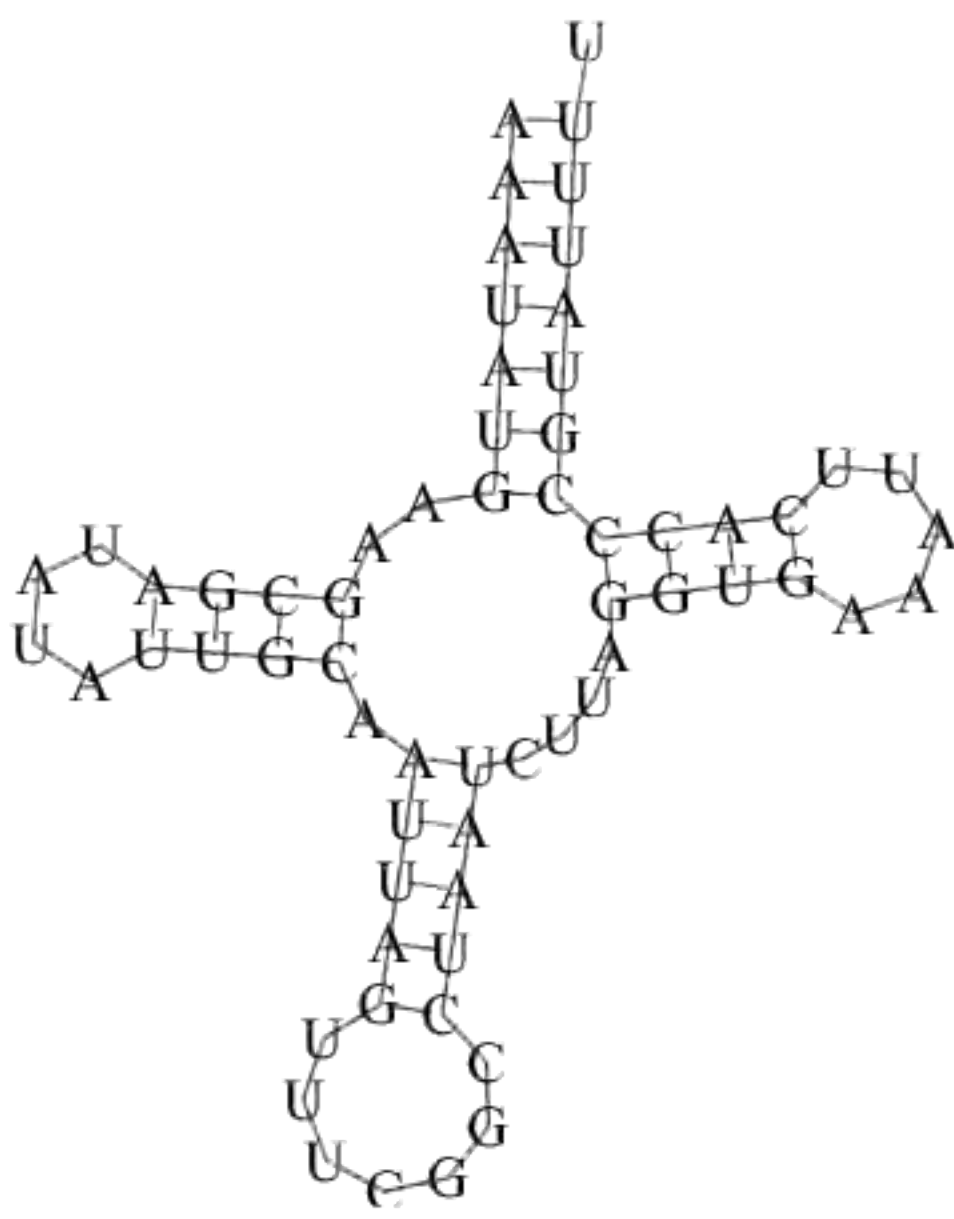

Asparagine(guu)

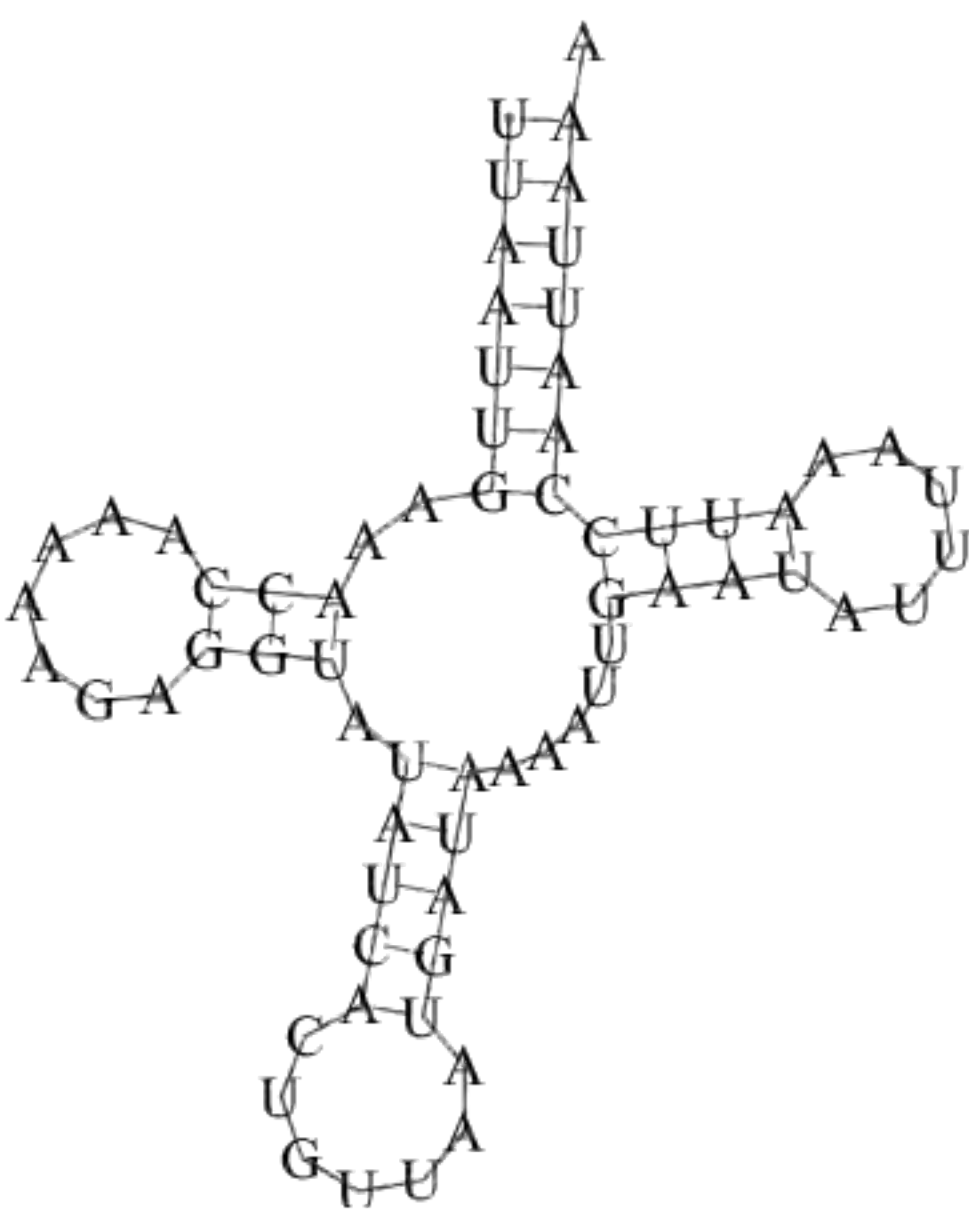

Aspartic acid(guc)

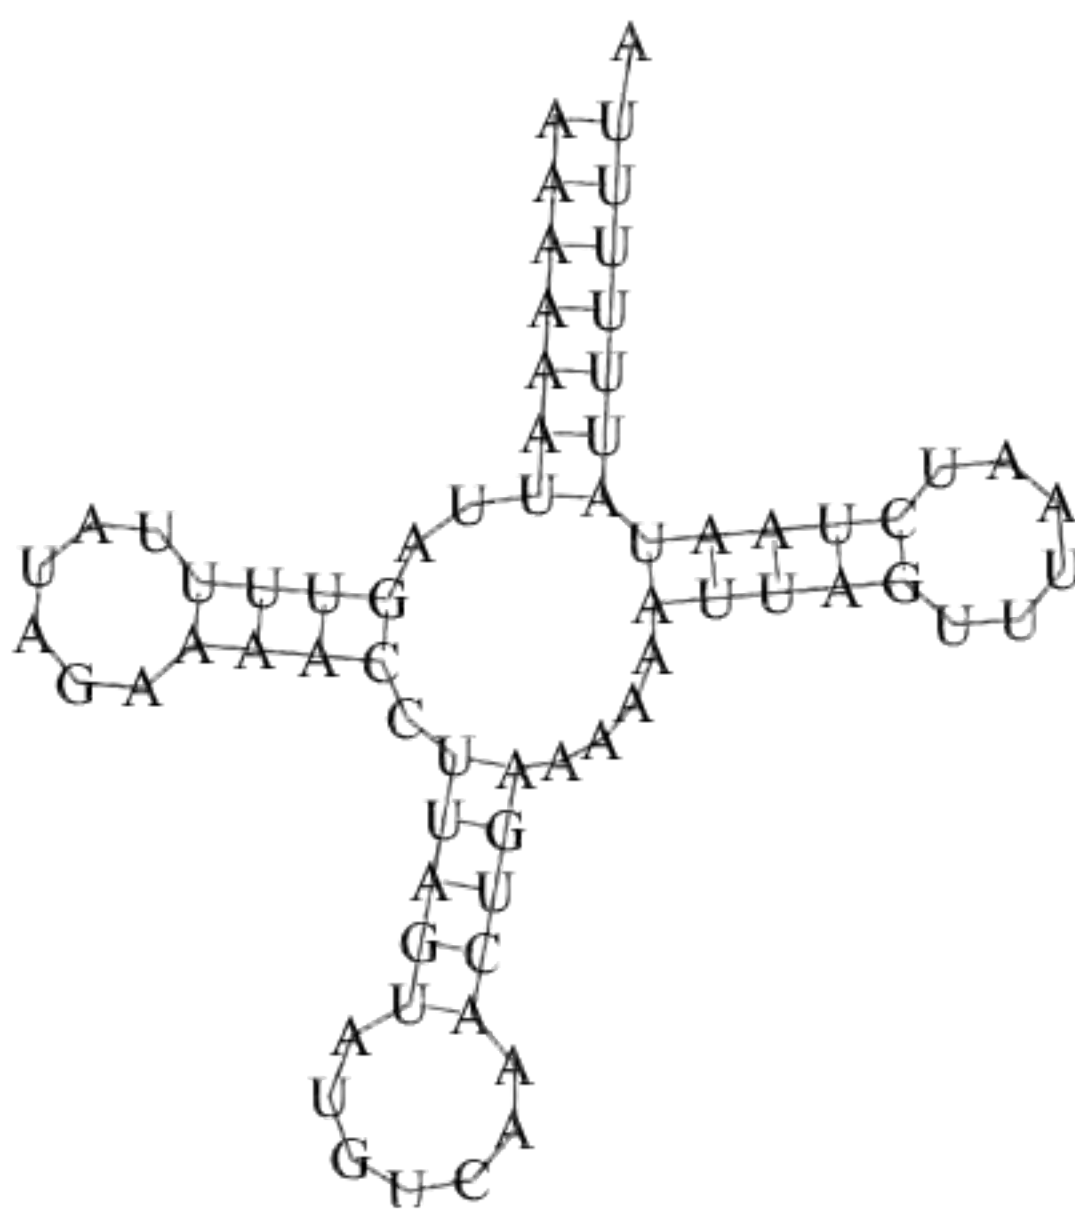

Cysteine(gca)

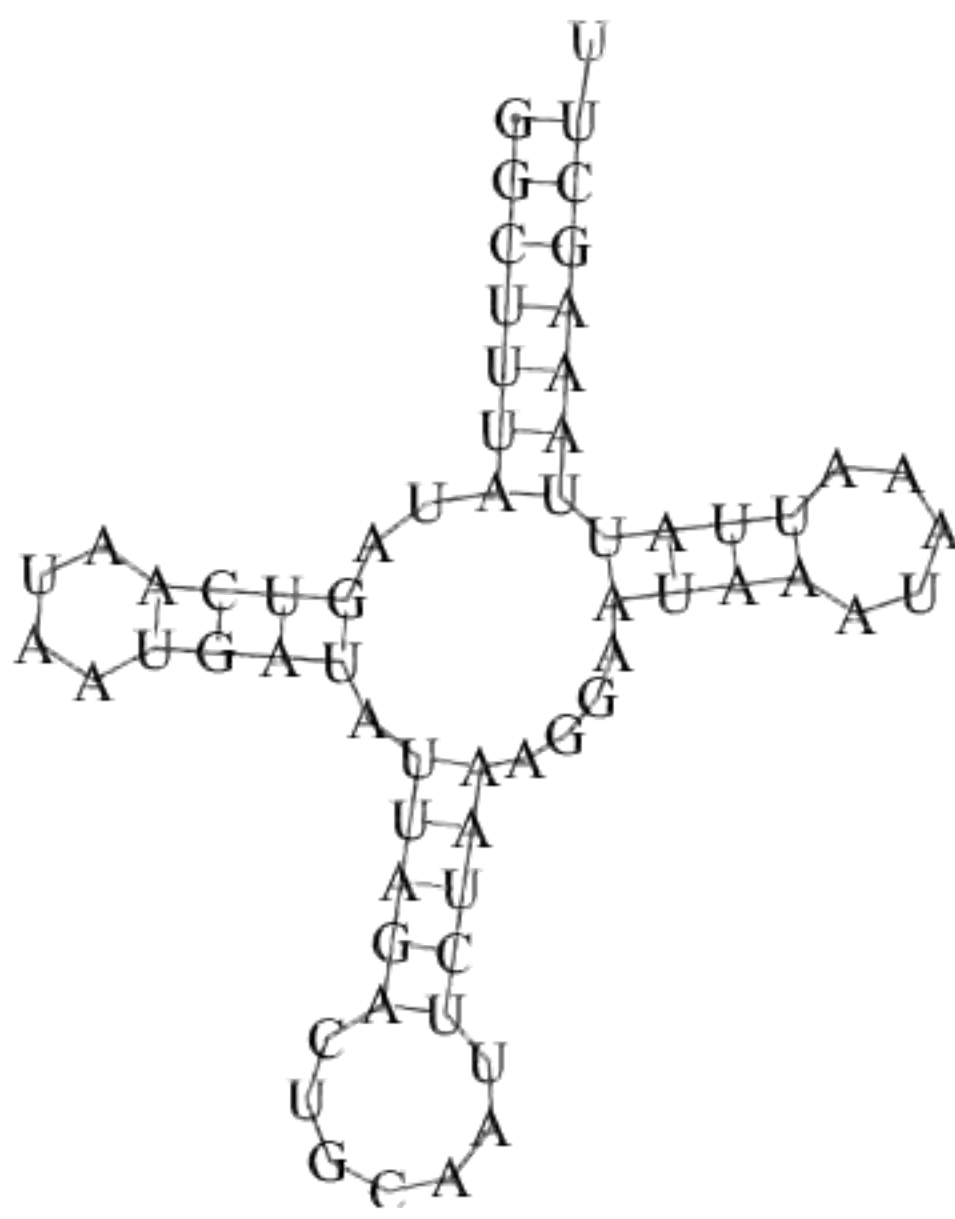

Glutamine(uuc)

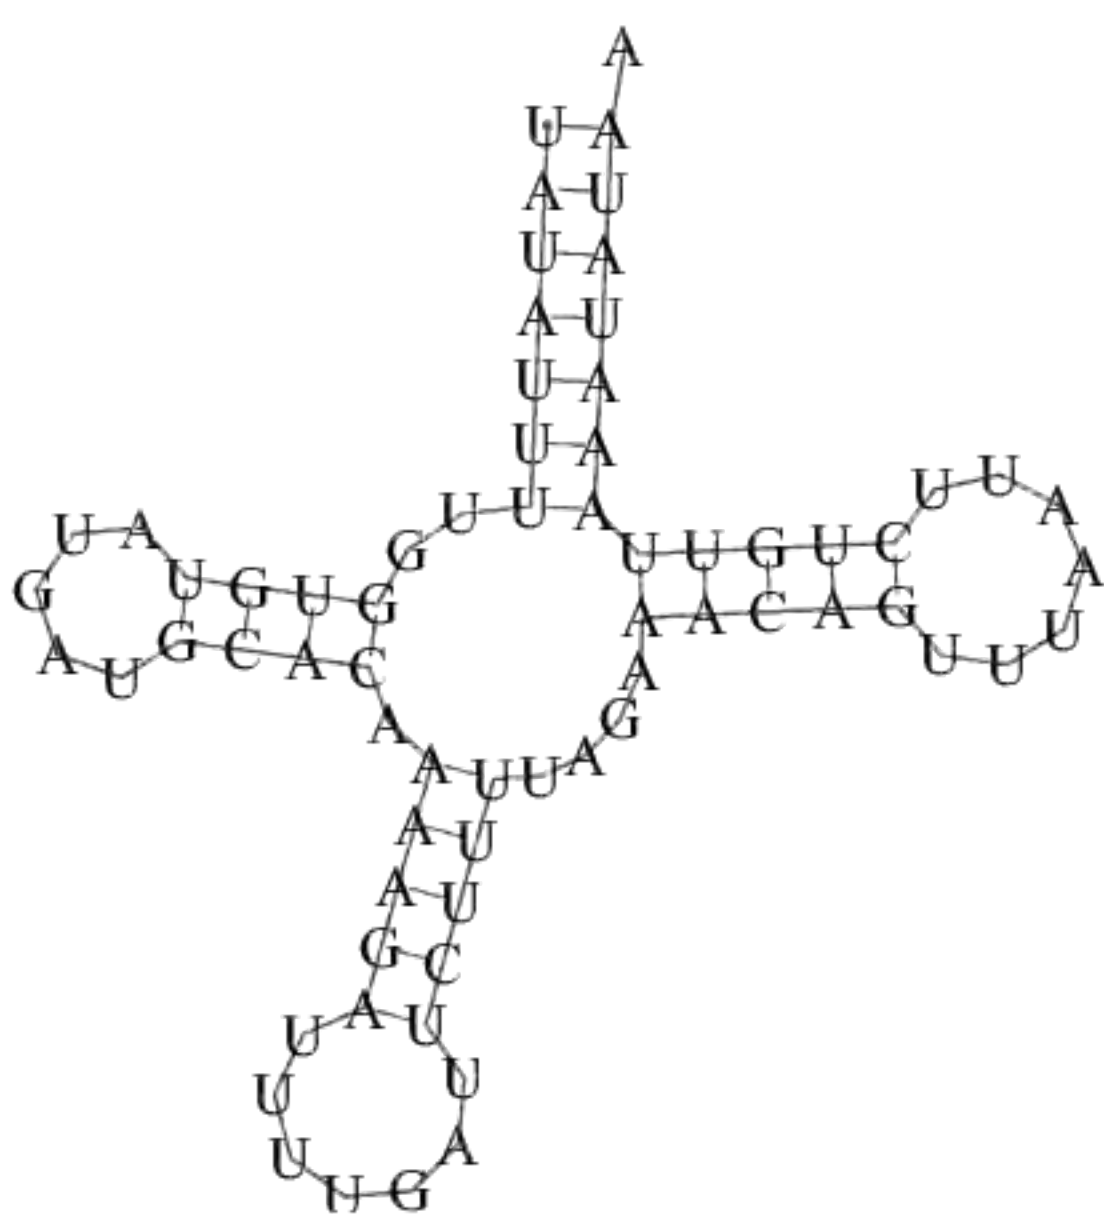

Glutamic acid(uug)

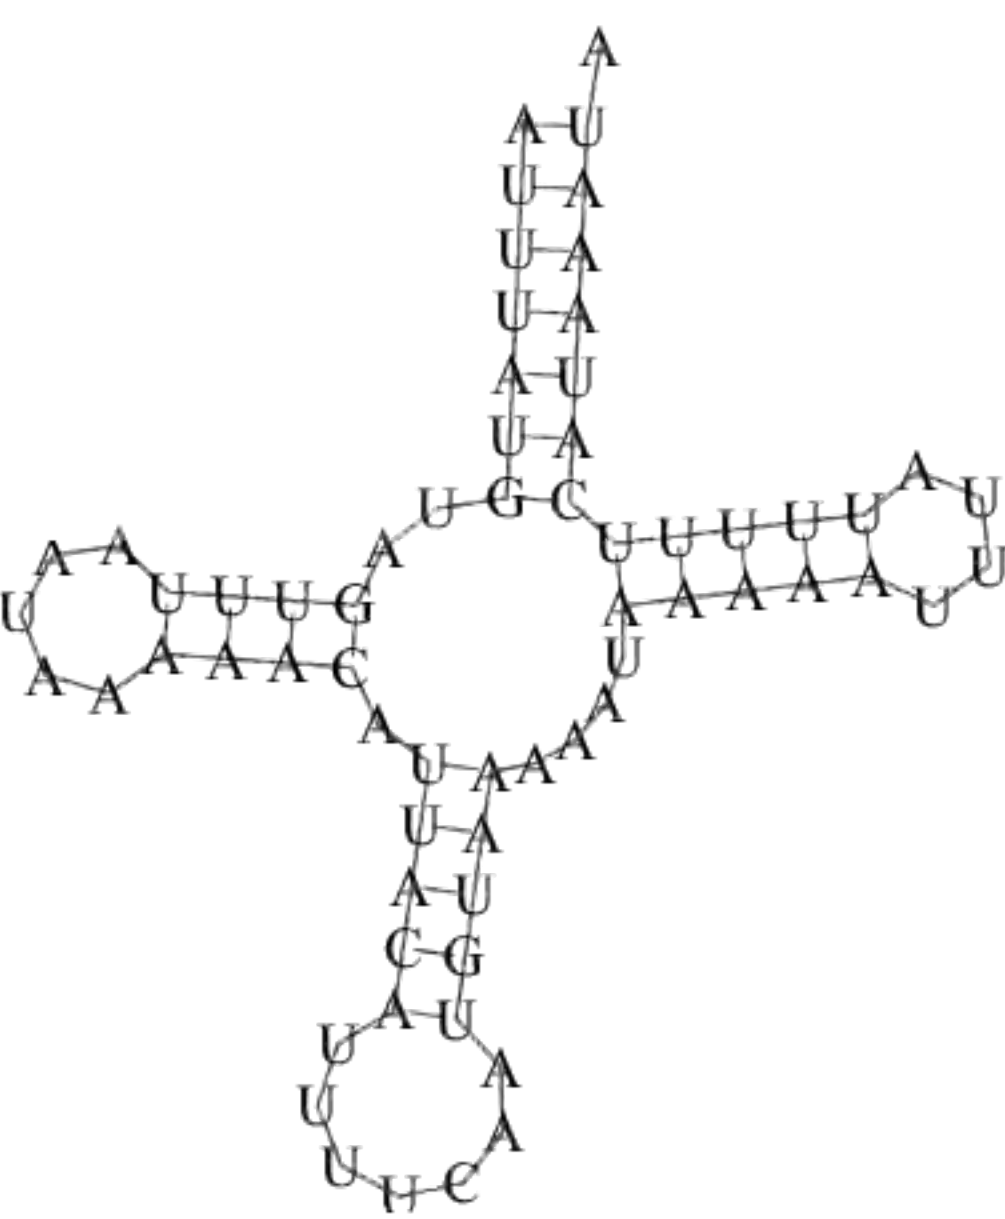

Glycine(ucc)

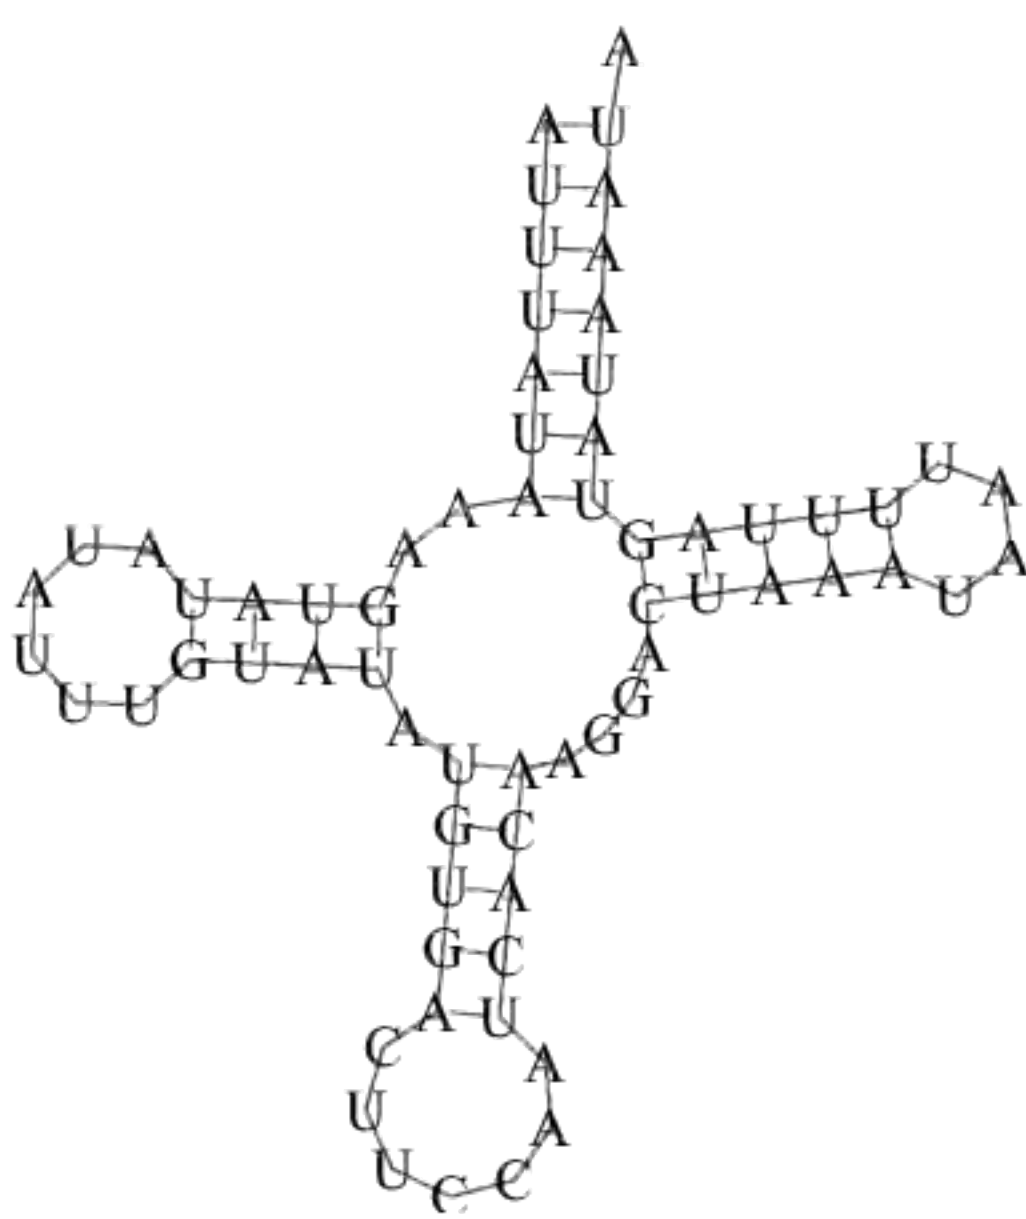

Histidine(gug)

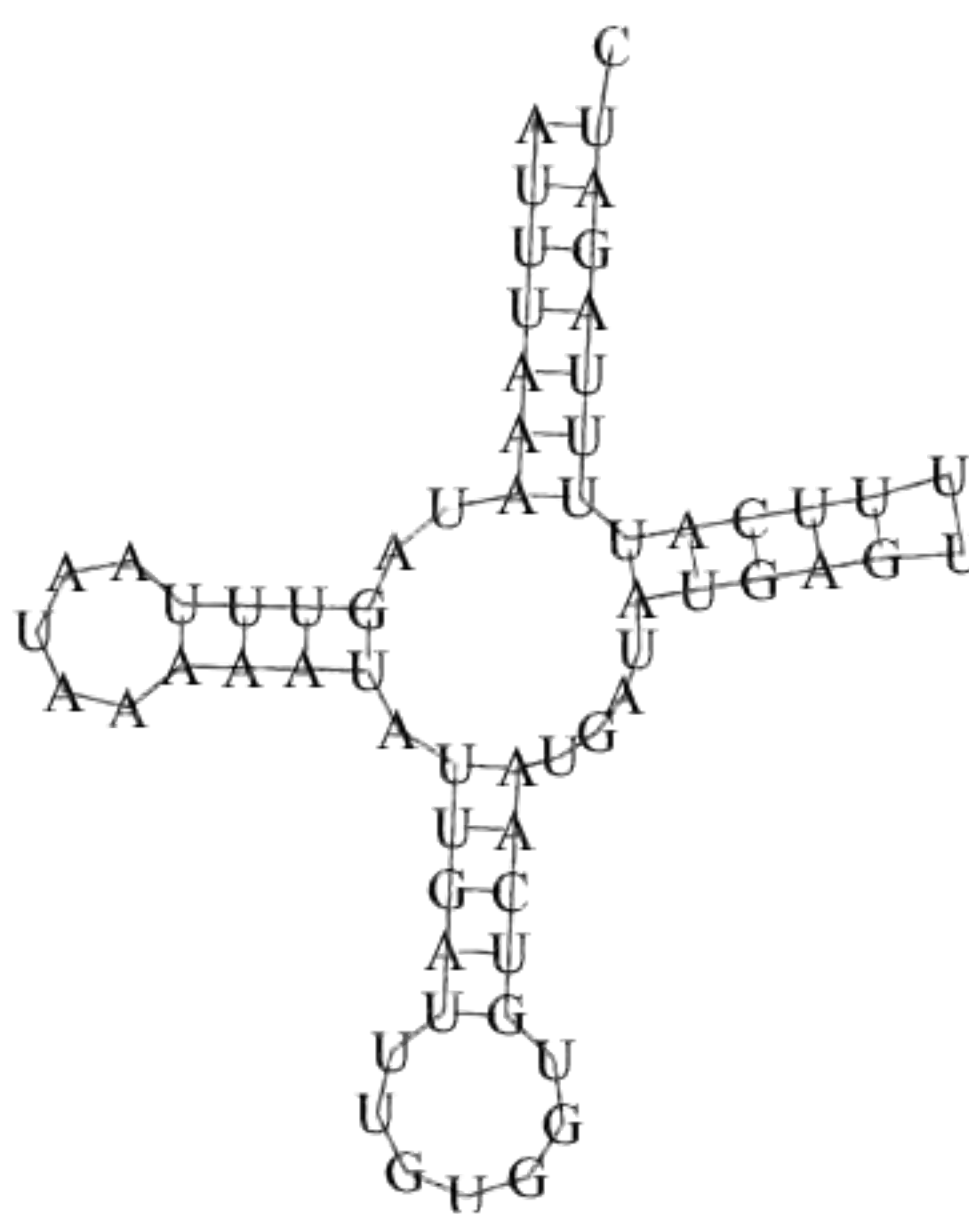

Isoleucine(gau)

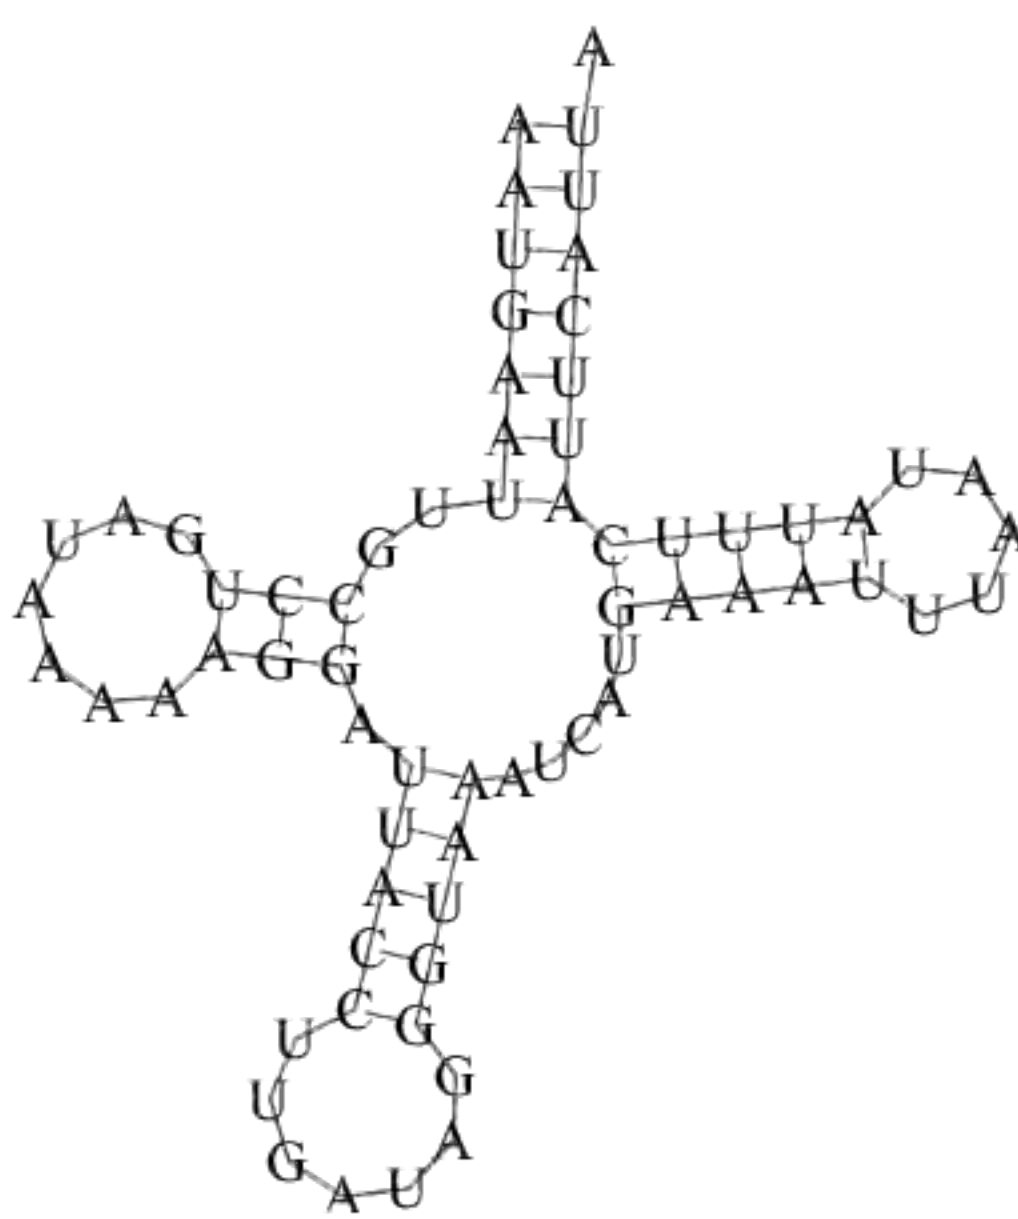

Leucine(uag)

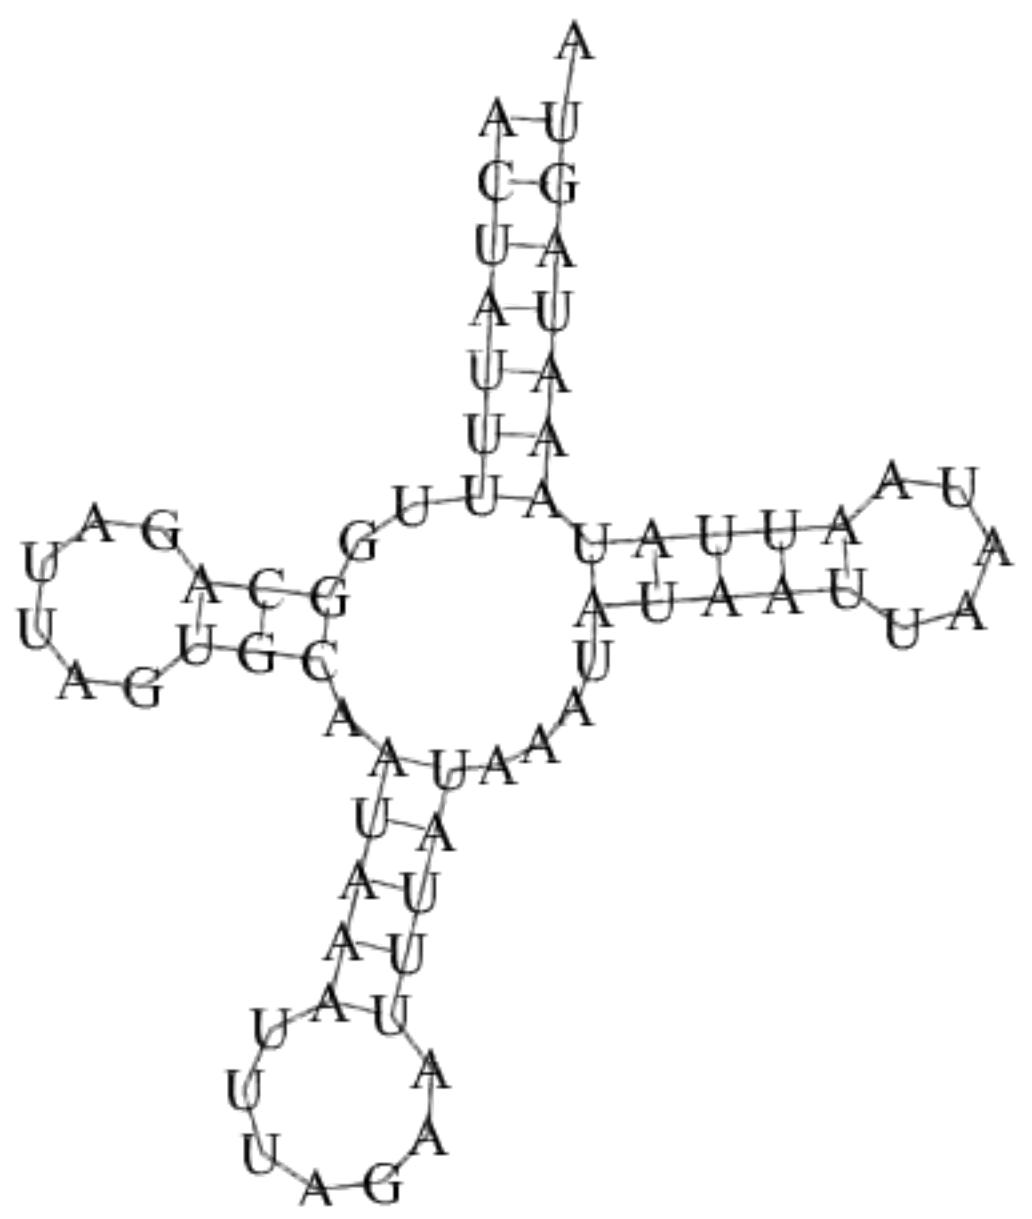

Leucine(uaa)

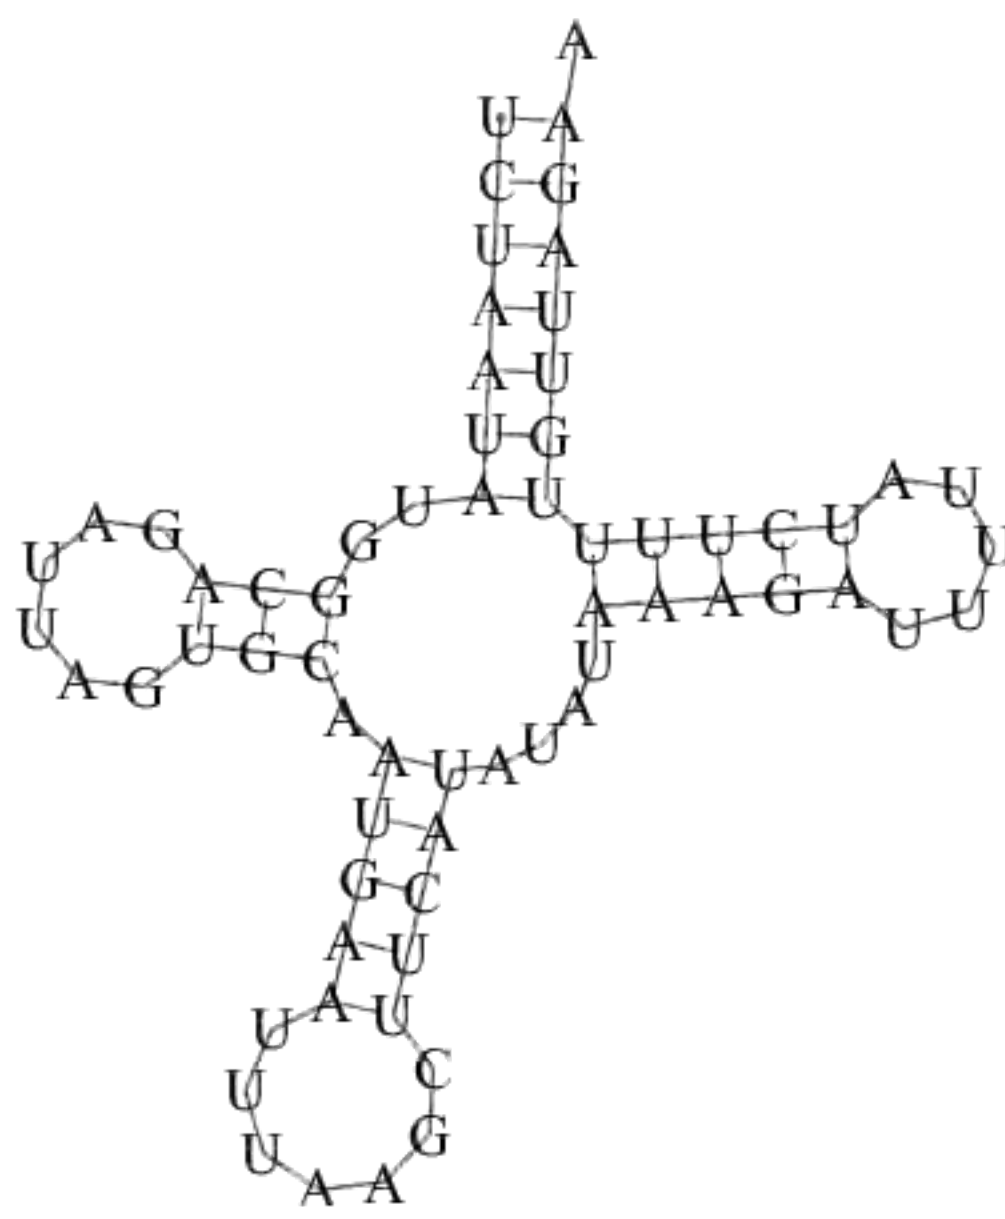

Lysine(cuu)

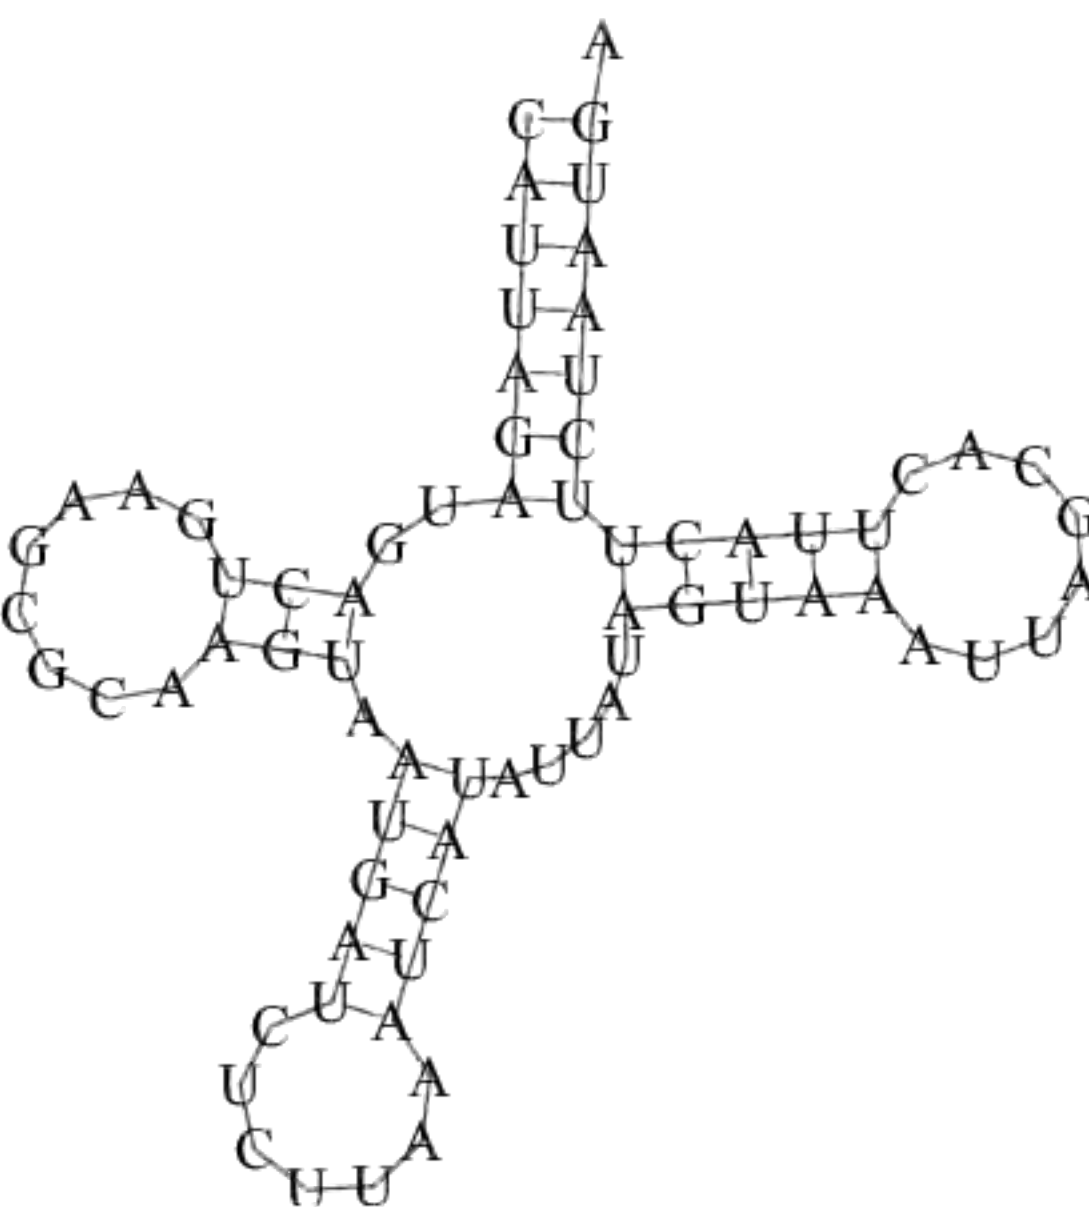

Methionine(cau)

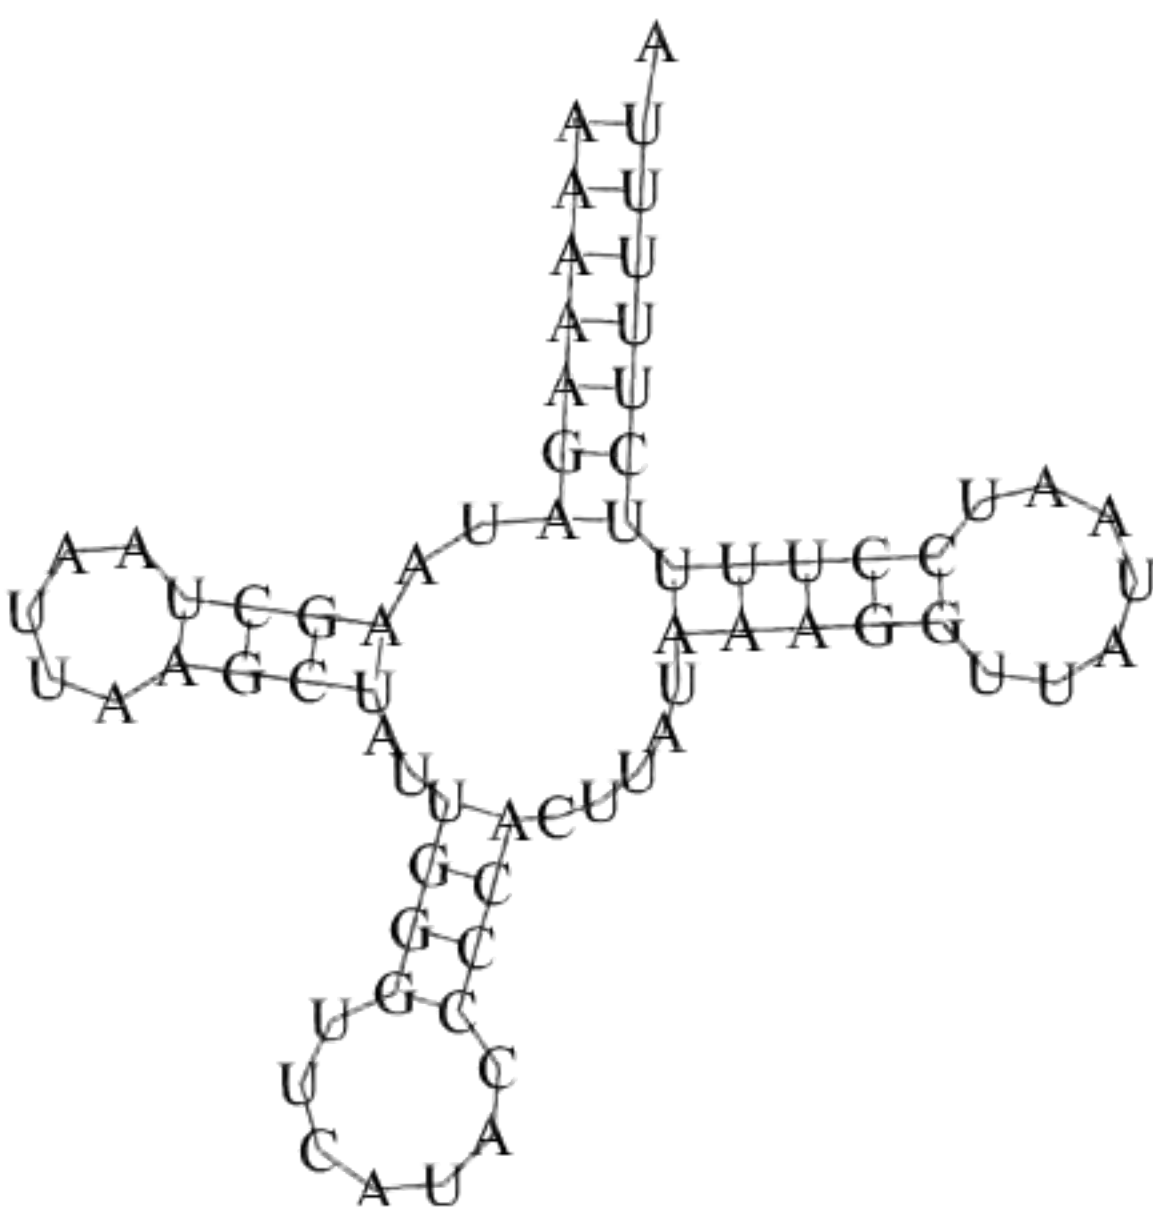

Phenylalanine(gaa)

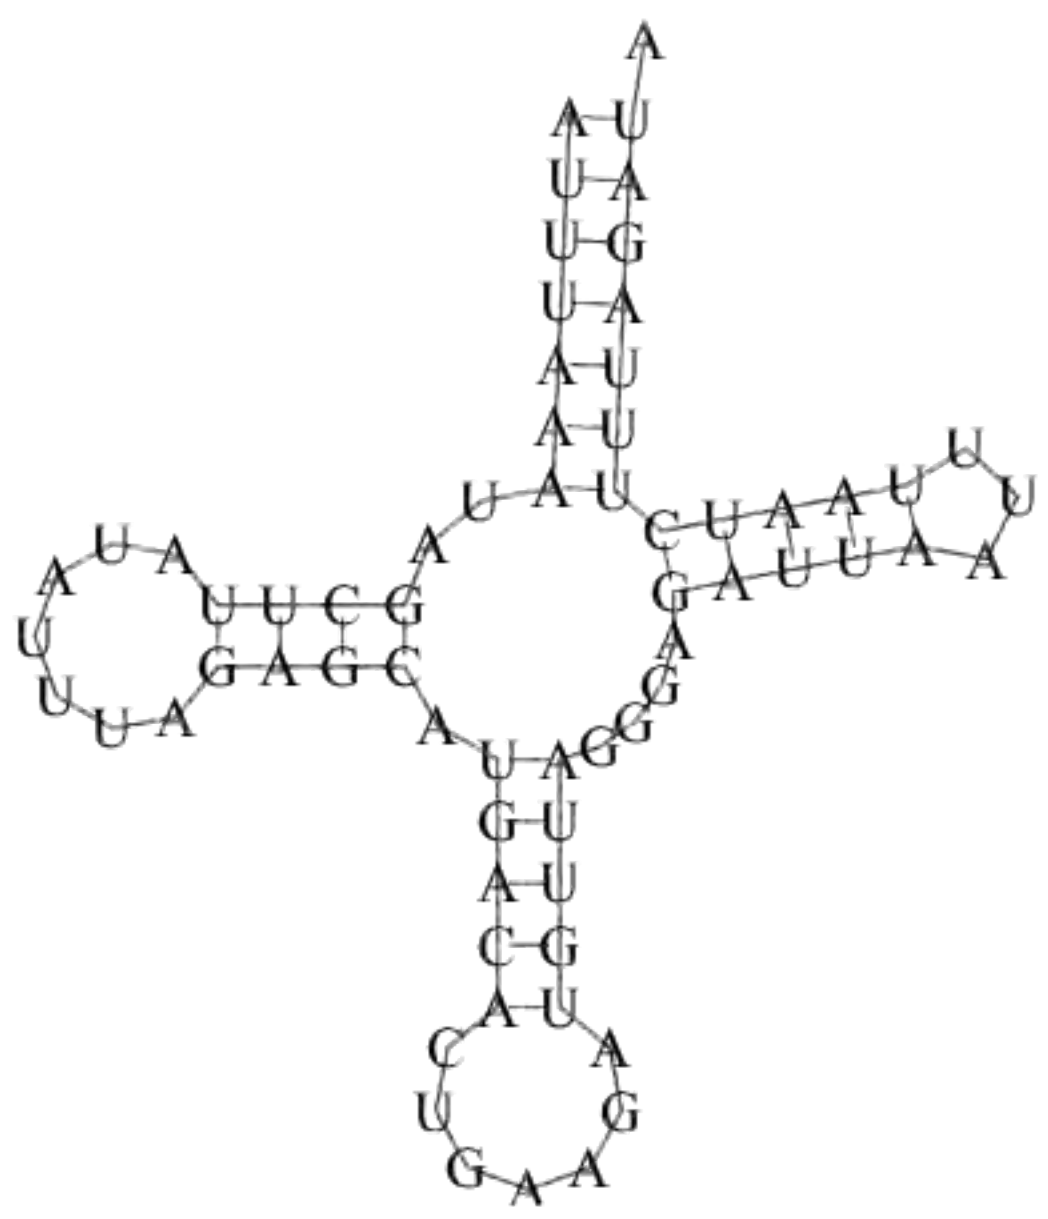

Proline(ugg)

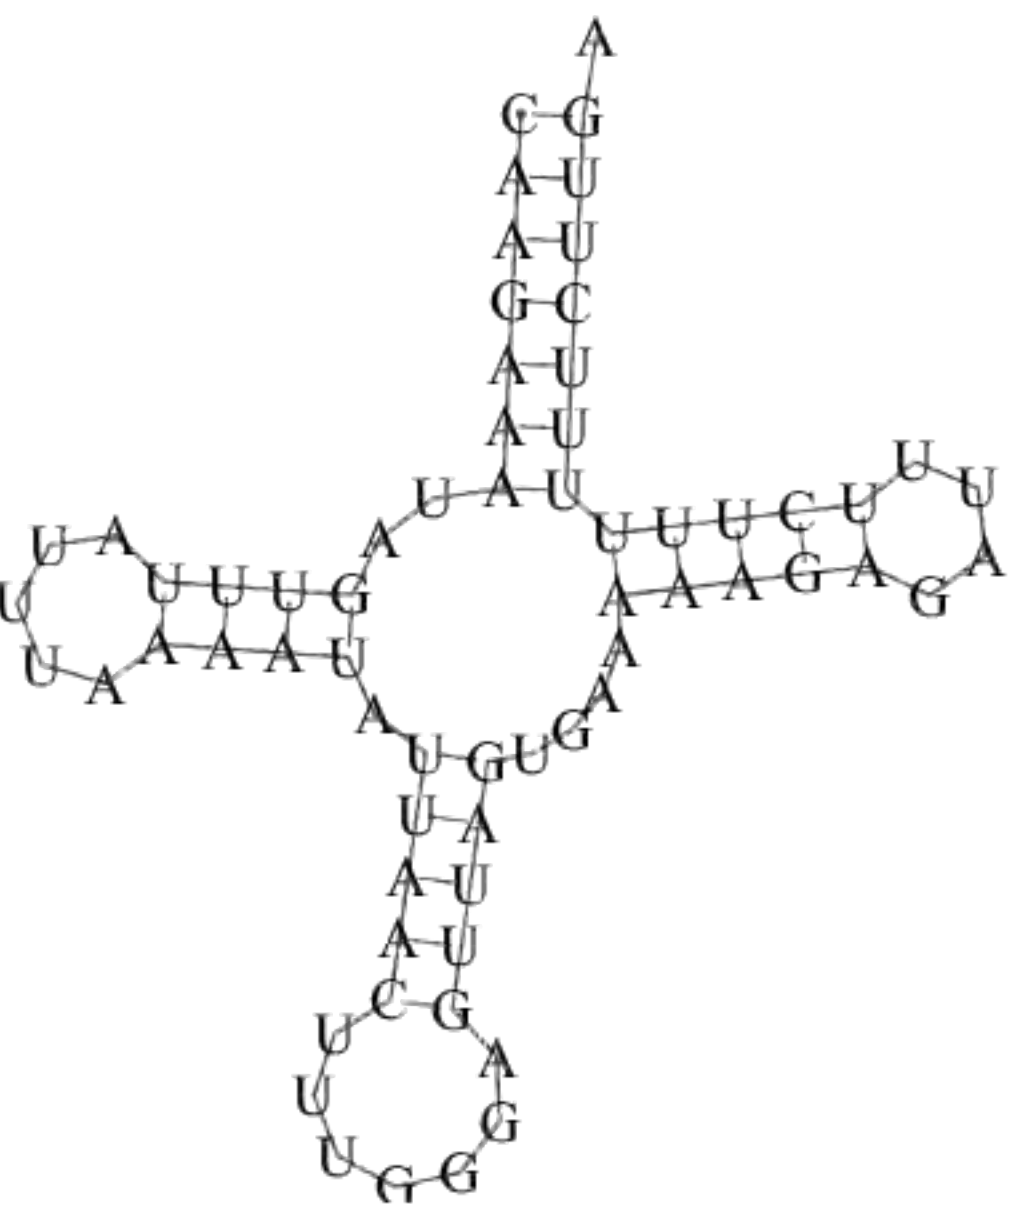

Serine(gcu)

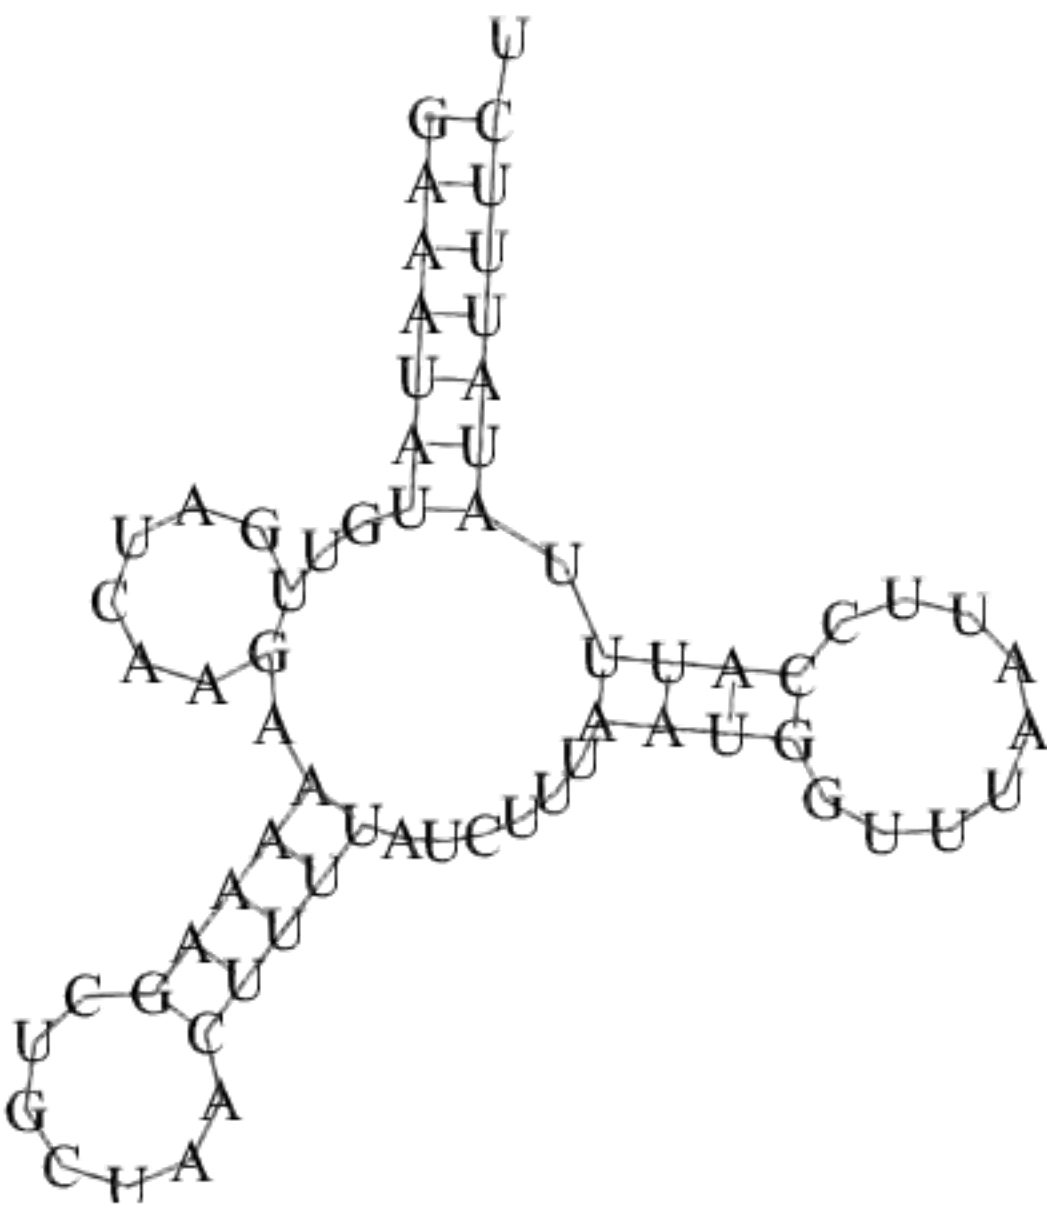

Serine(uga)

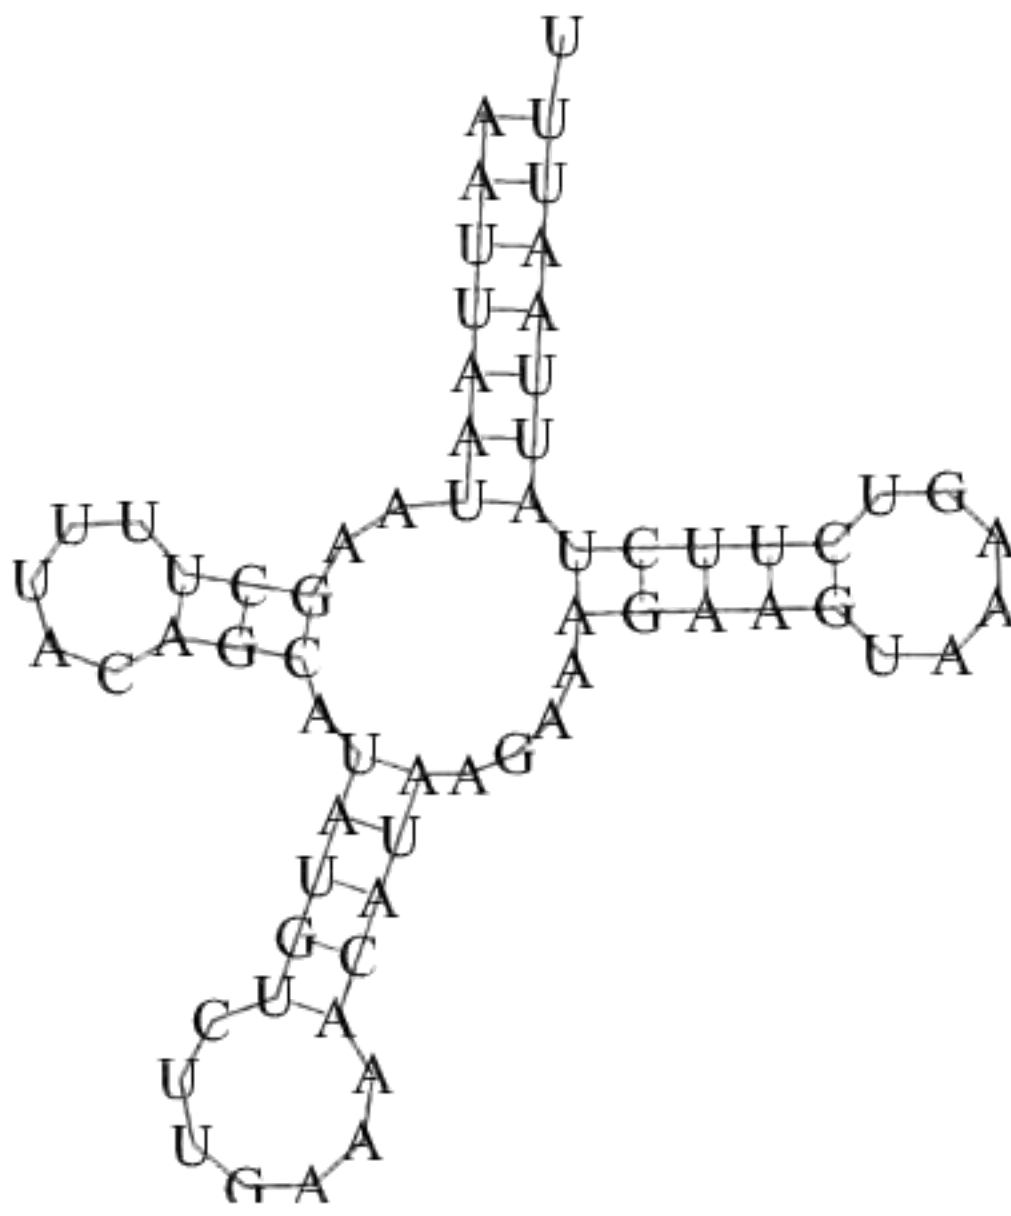

Threonine(ugu)

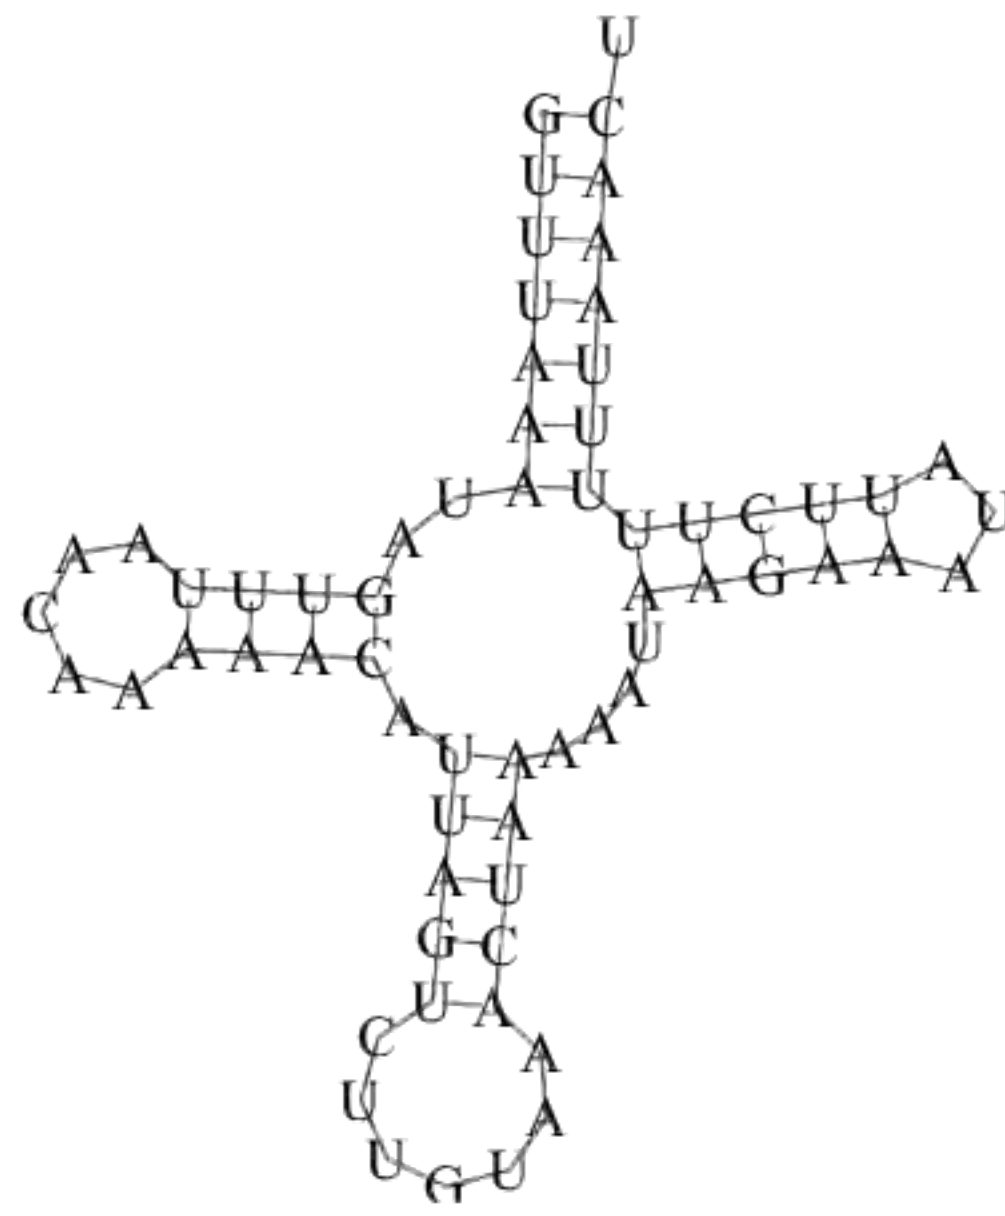

Tryptophan(uca)

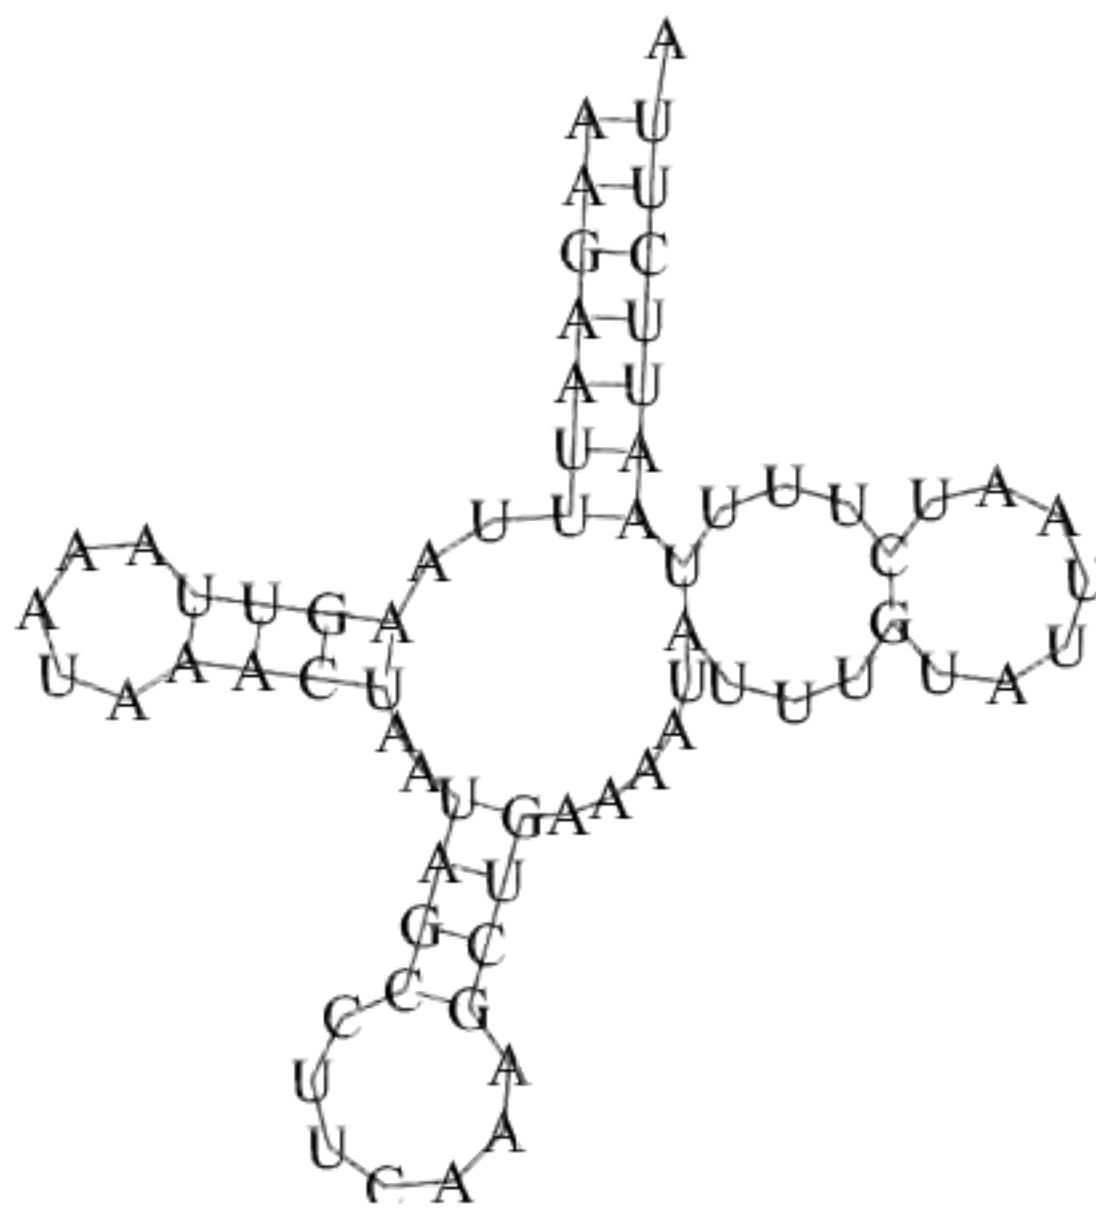

Tyrosine(gua)

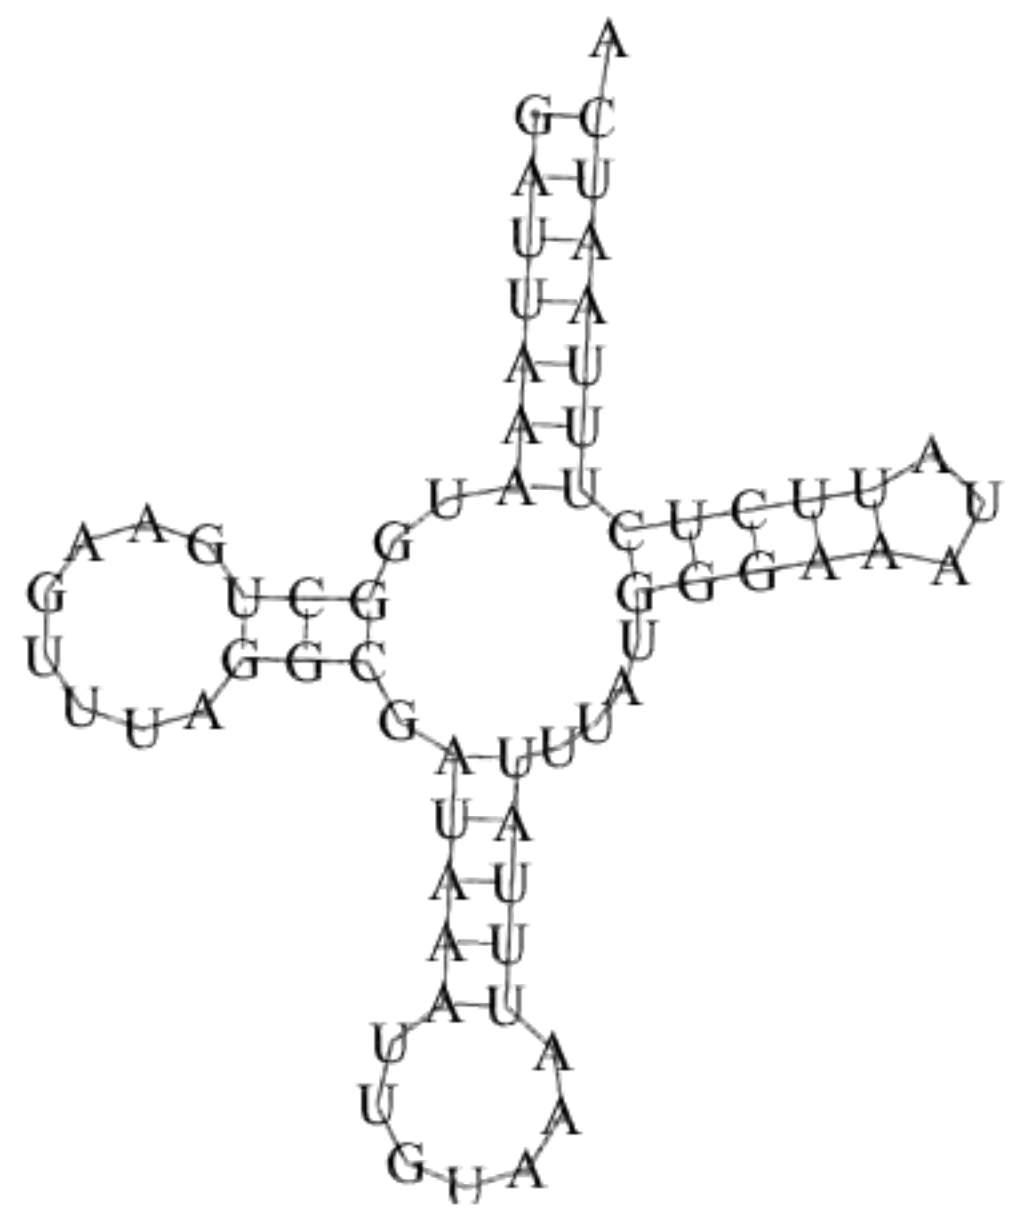

Valine(uac)

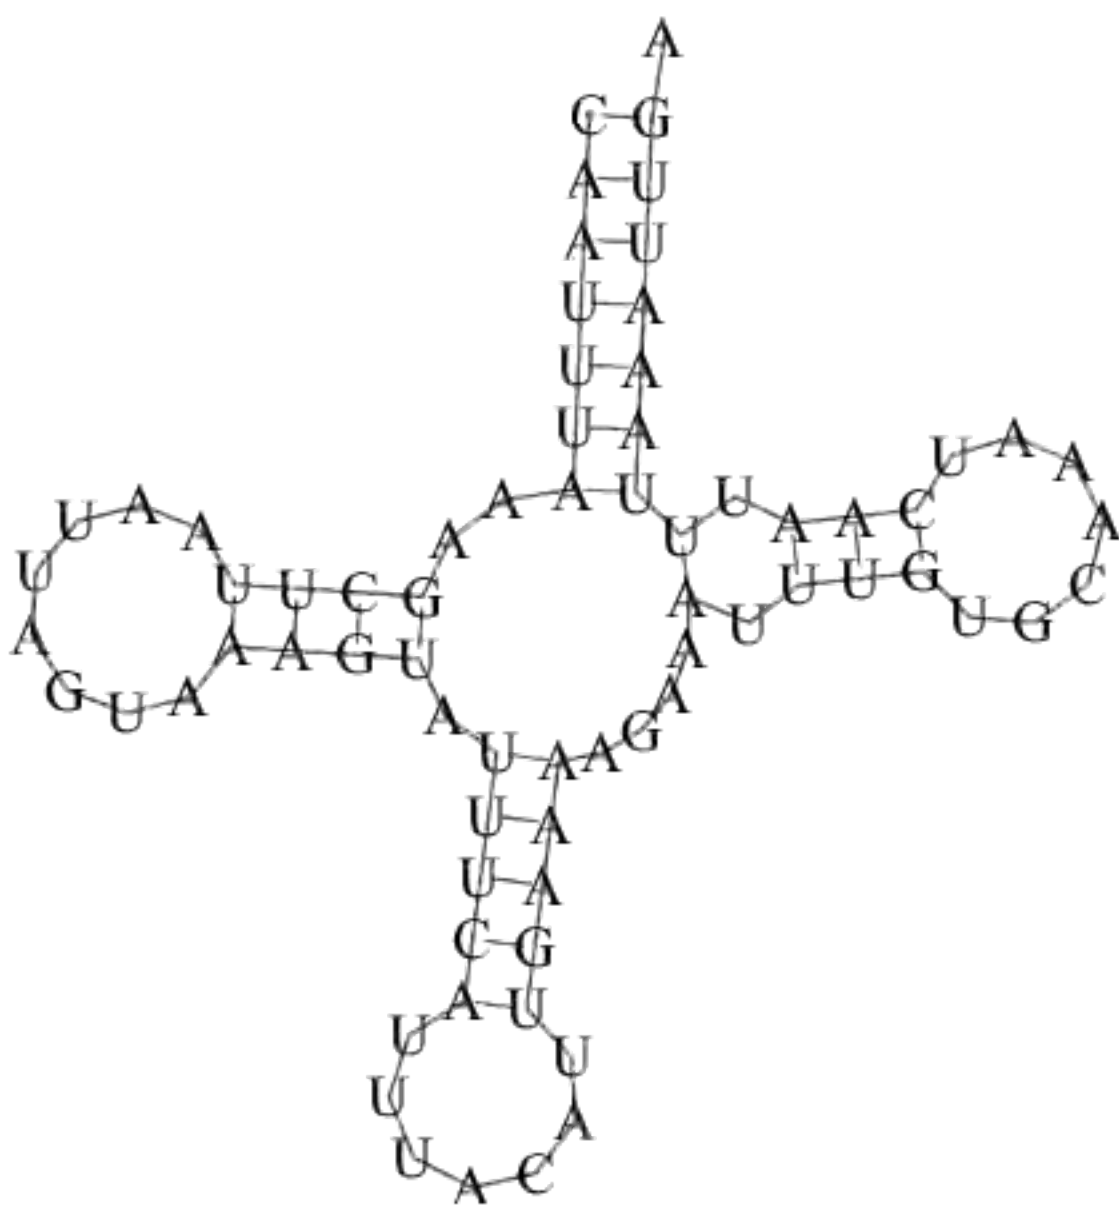



An. sinensis

Alanine(ugc)

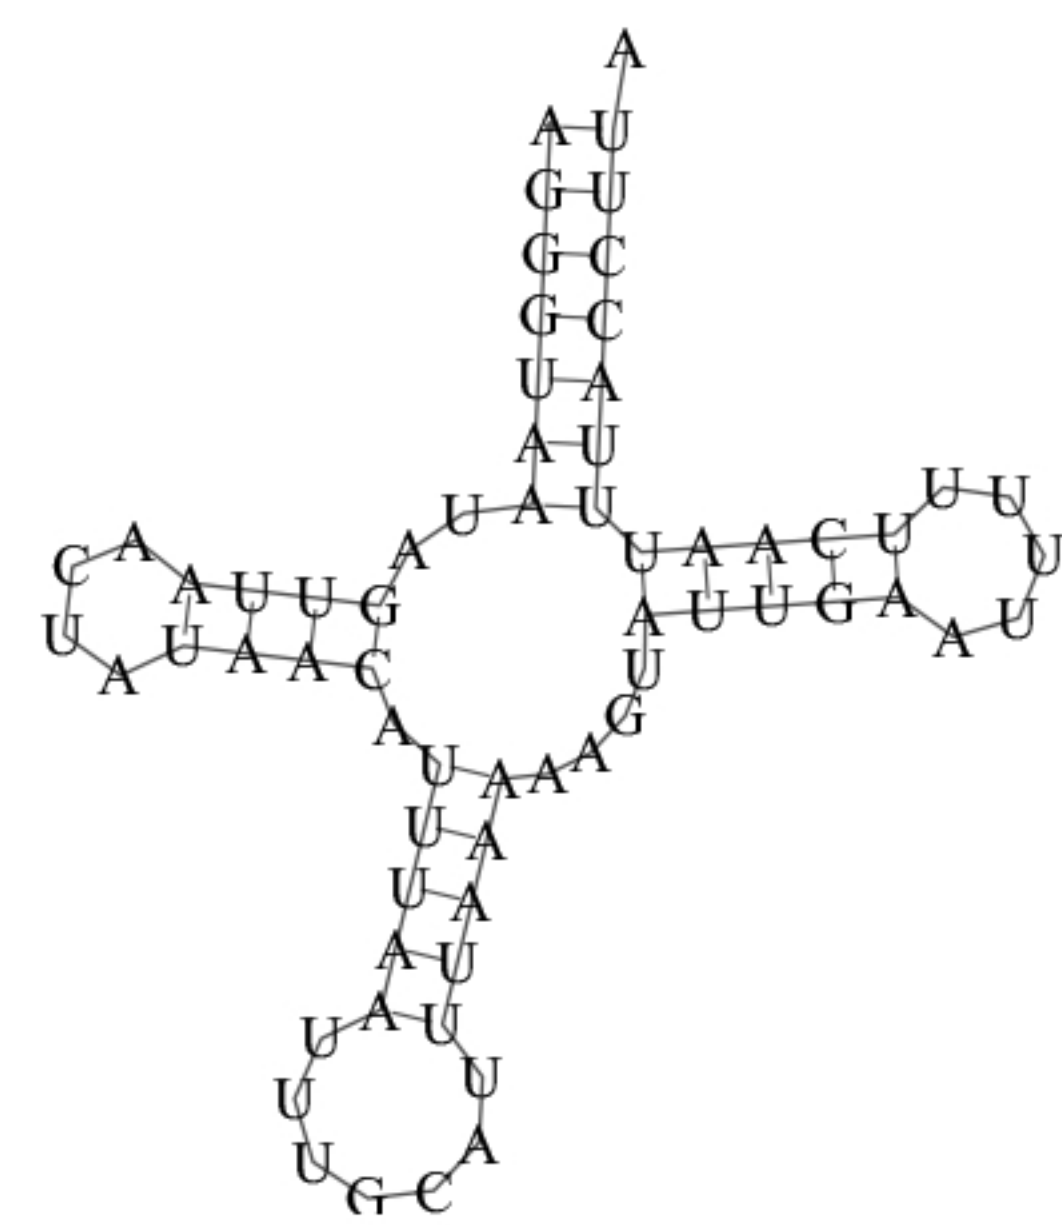

Arginine(ucg)

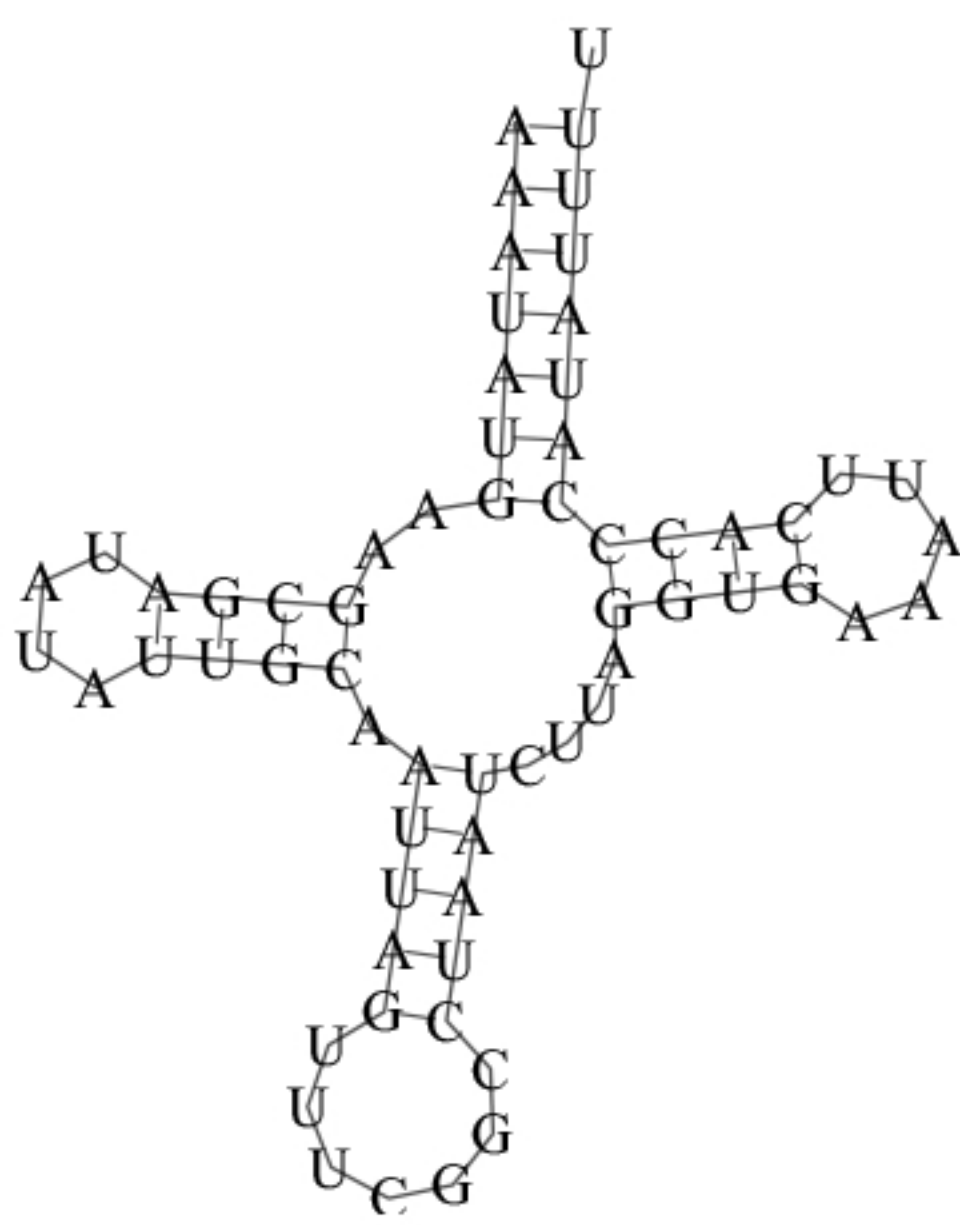

Asparagine(guu)

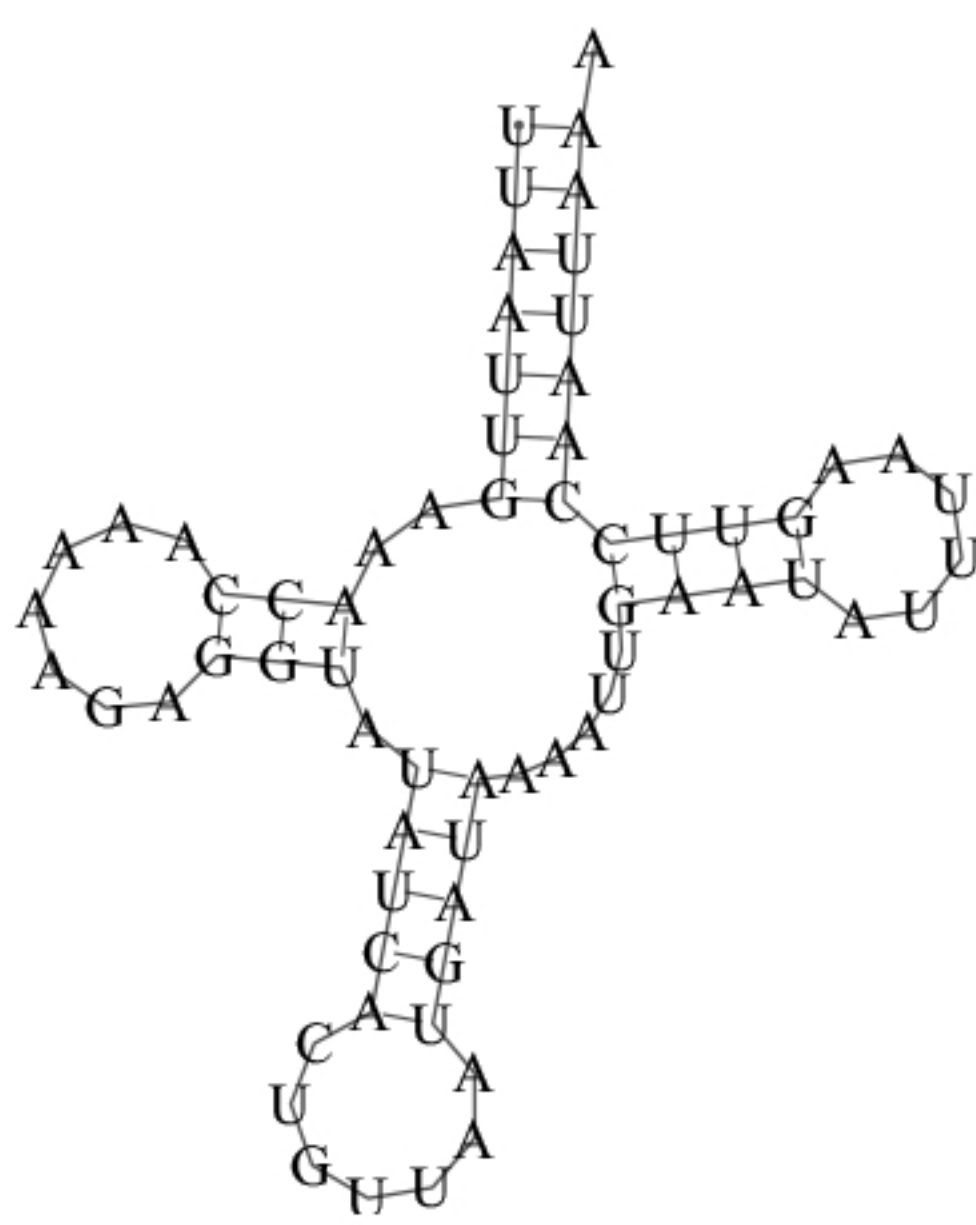

Aspartic acid(guc)

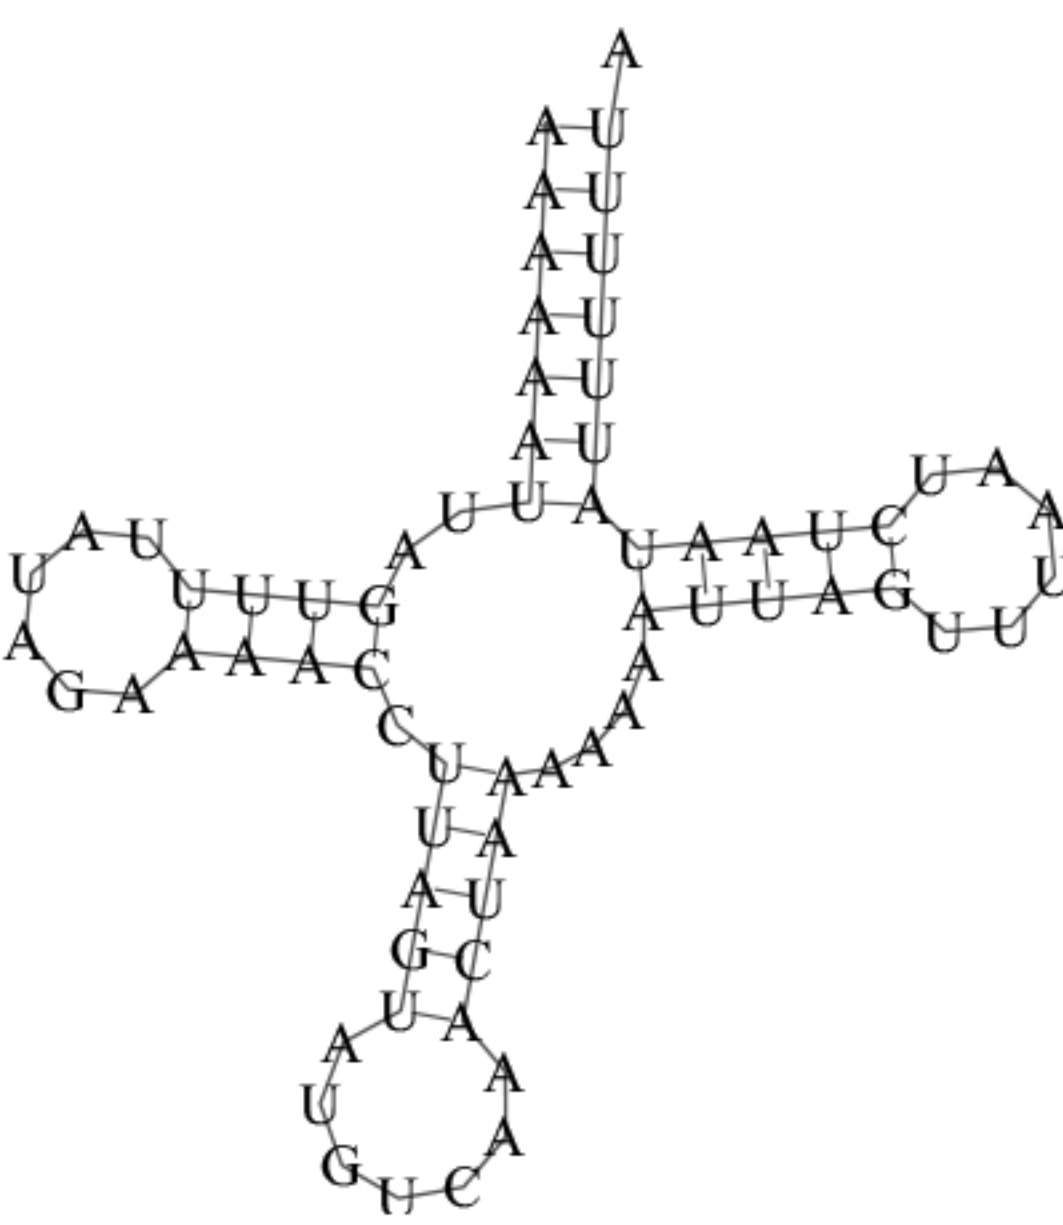

Cysteine(gca)

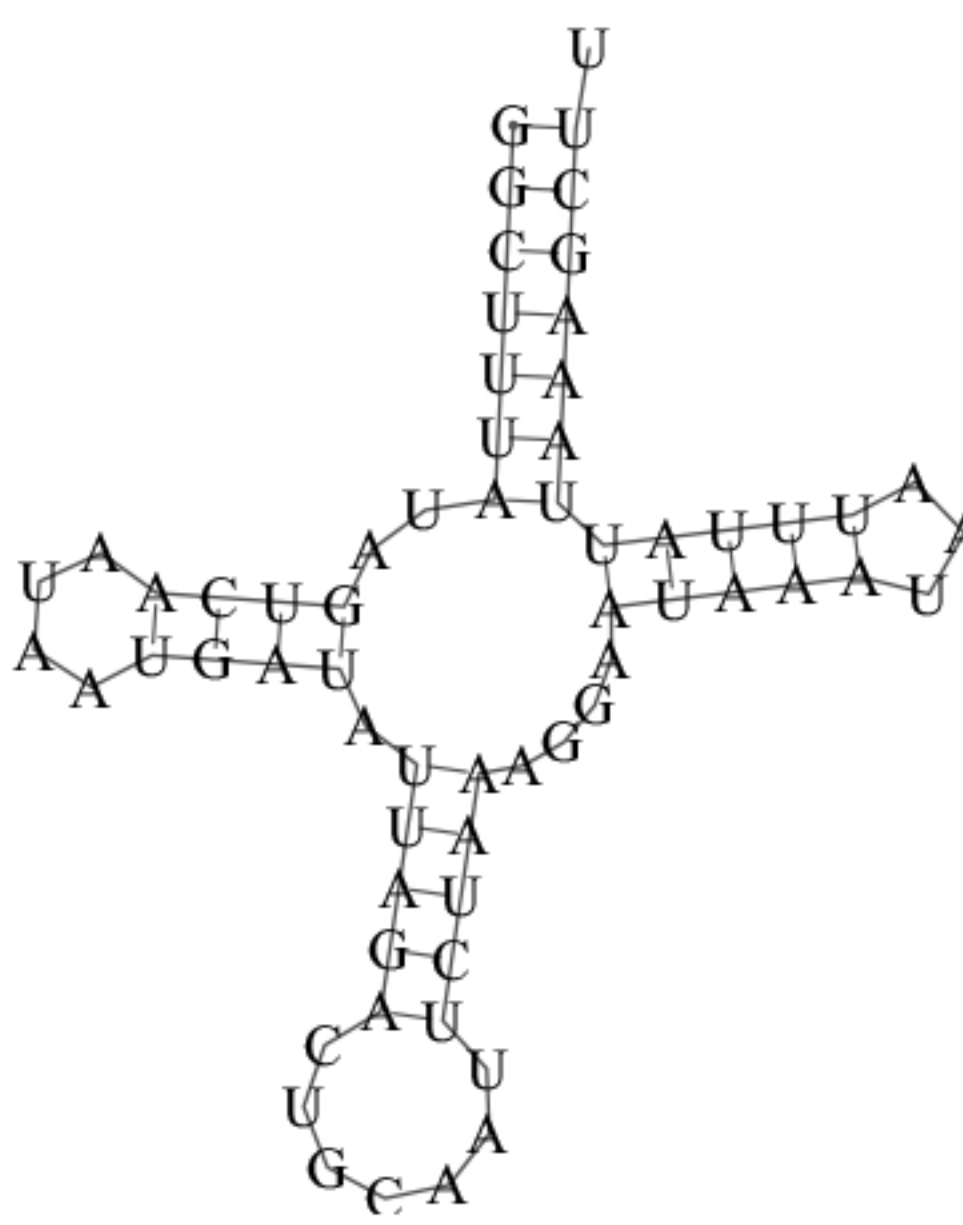

Glutamine(uuc)

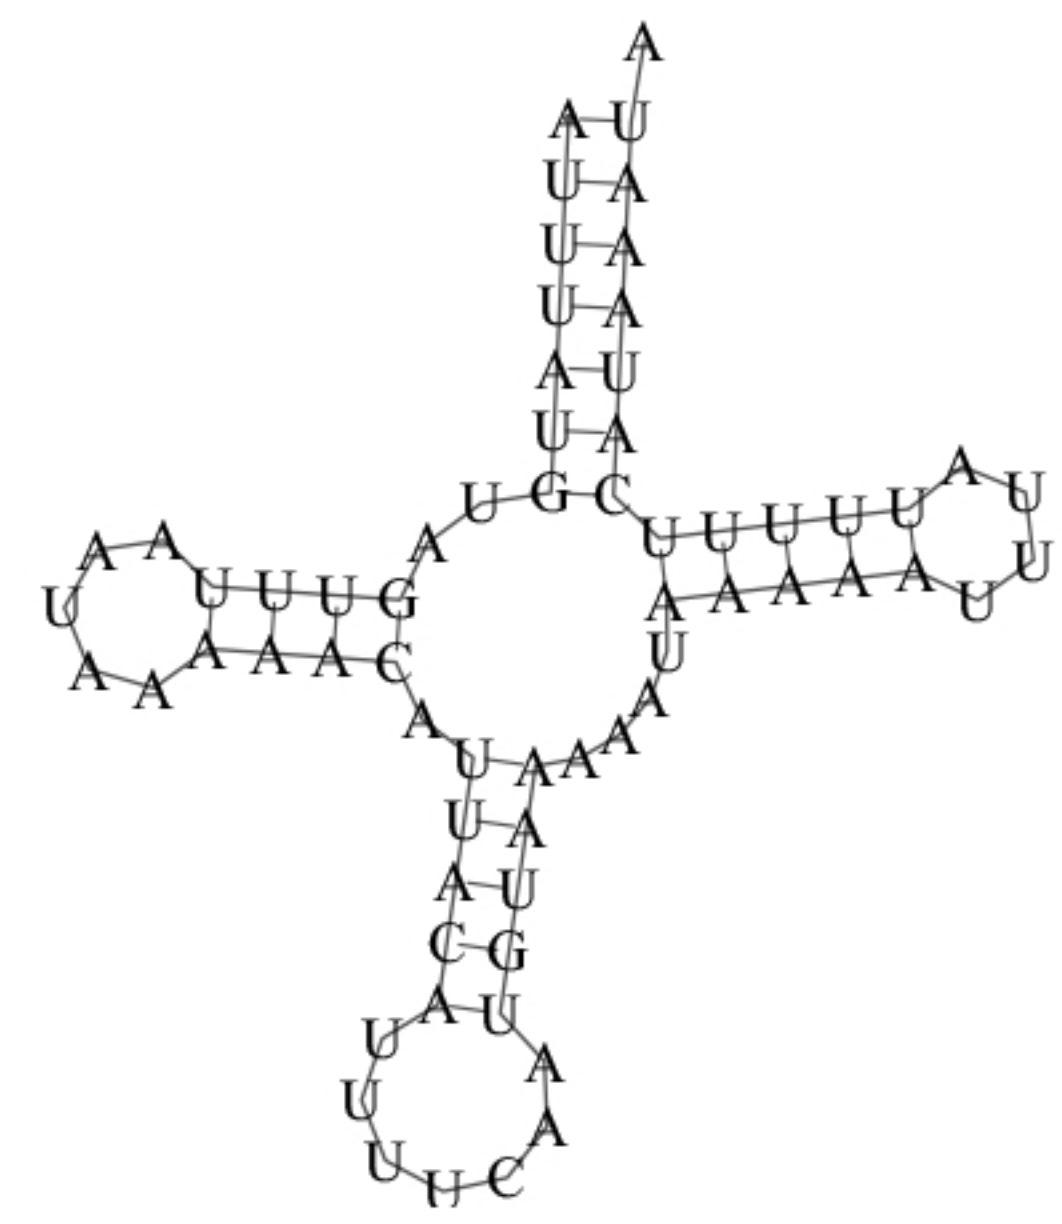

Glutamic acid(uug)

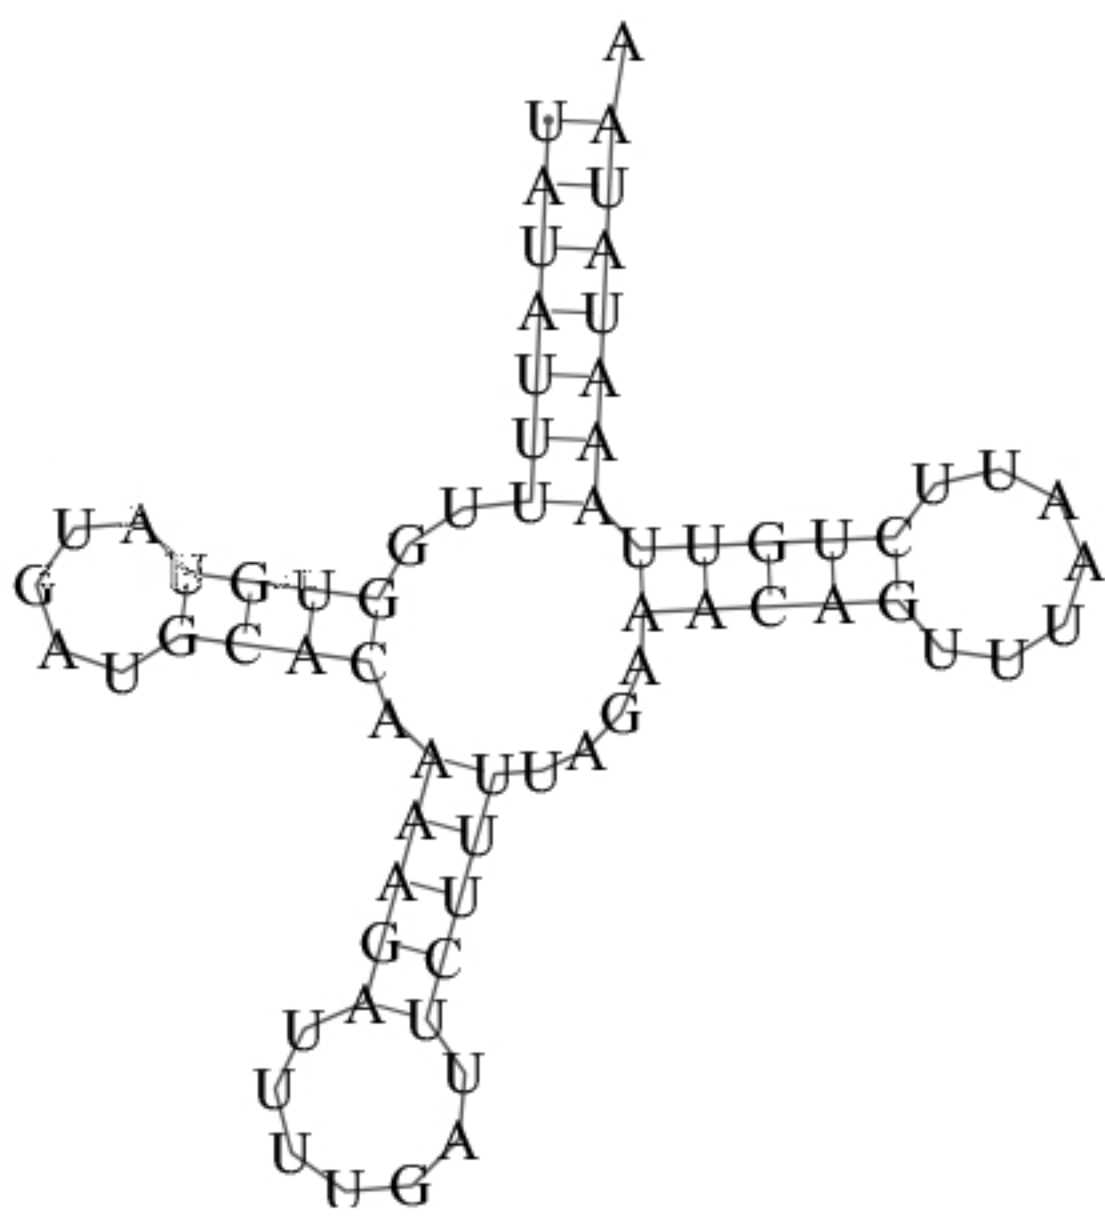

Glycine(ucc)

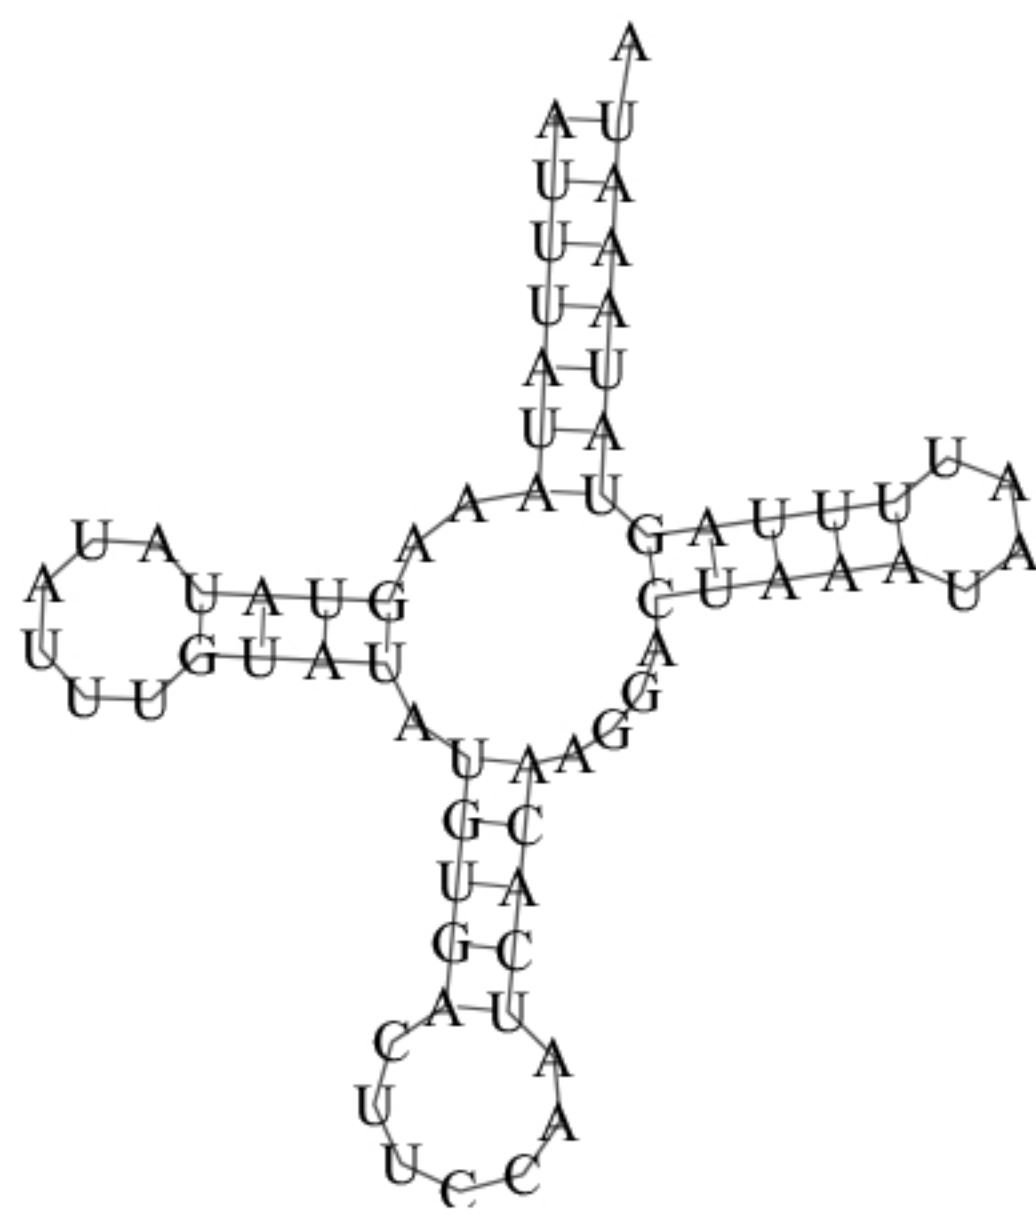

Histidine(gug)

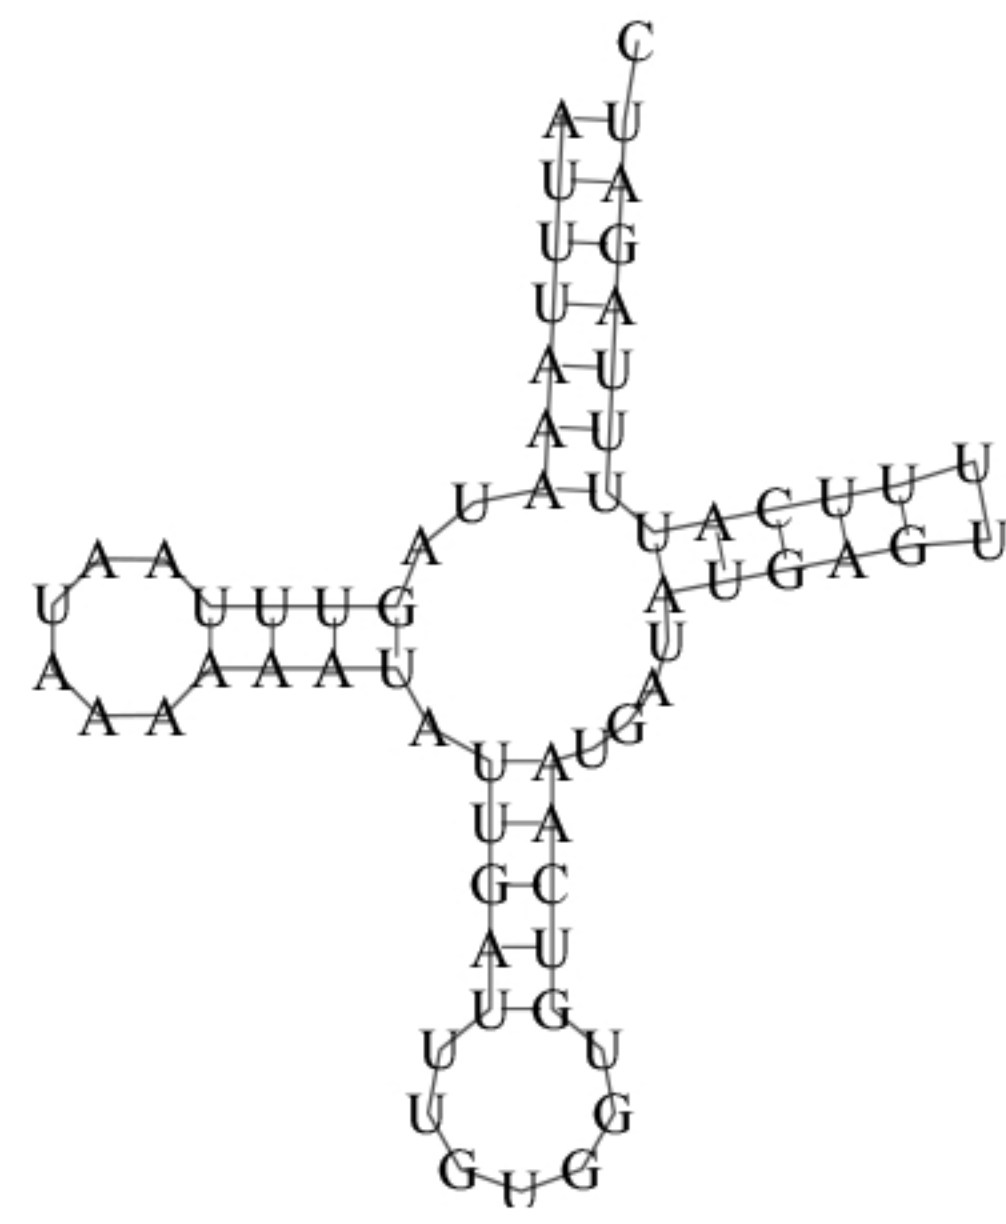

Isoleucine(gau)

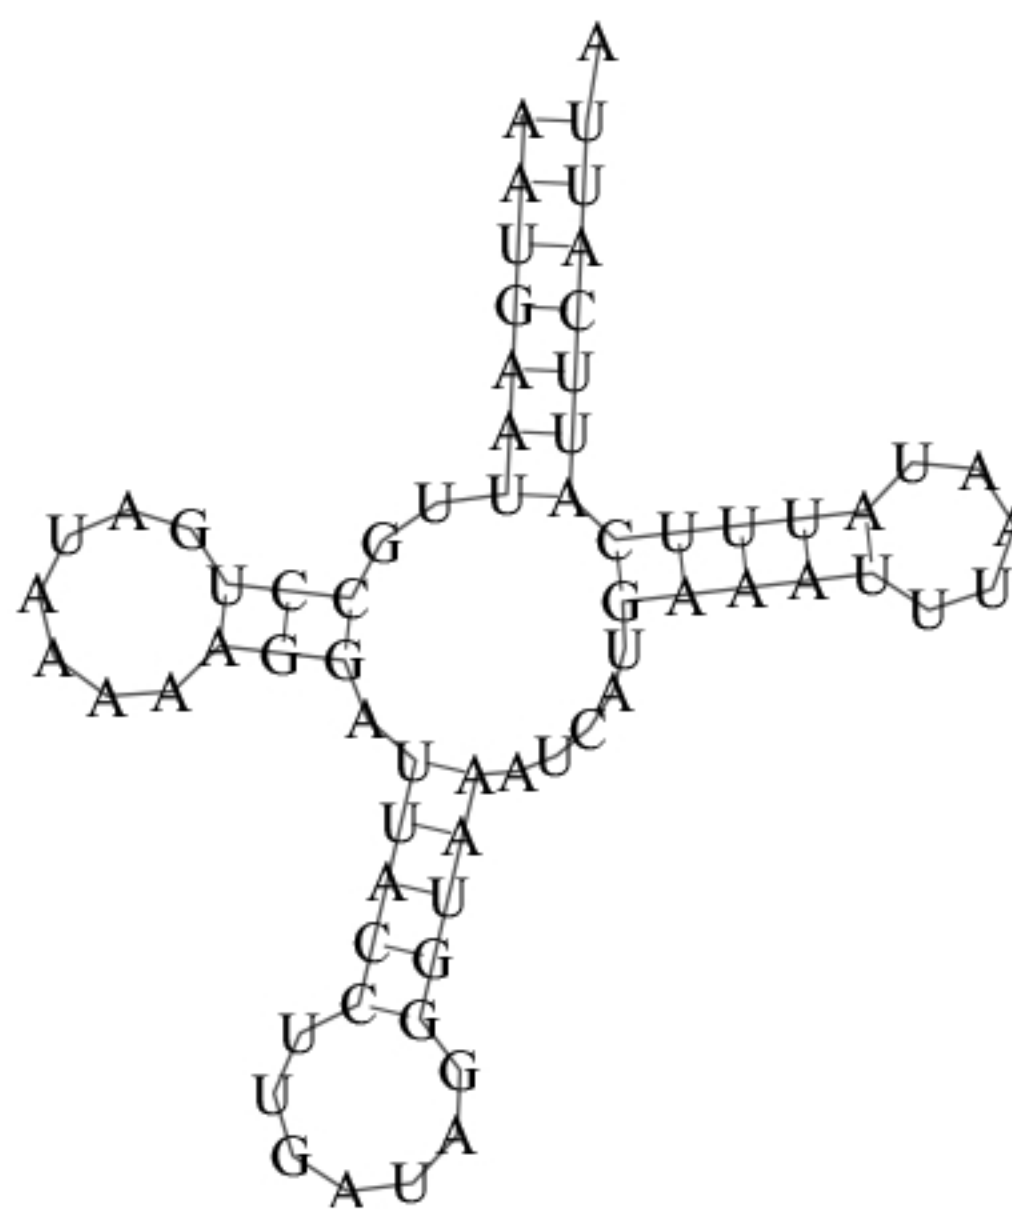

Leucine(uag)

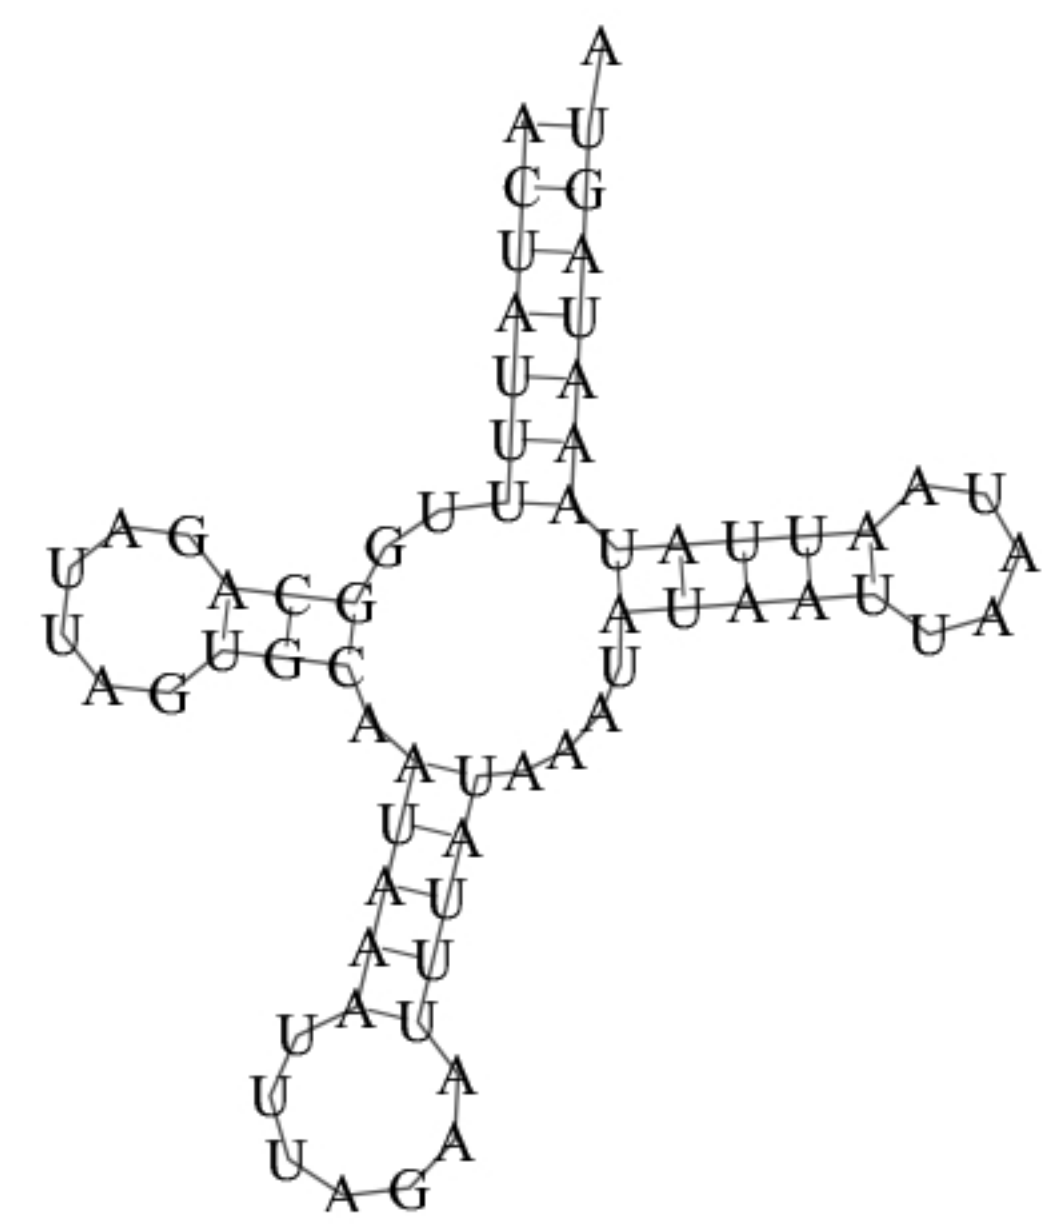

Leucine(uaa)

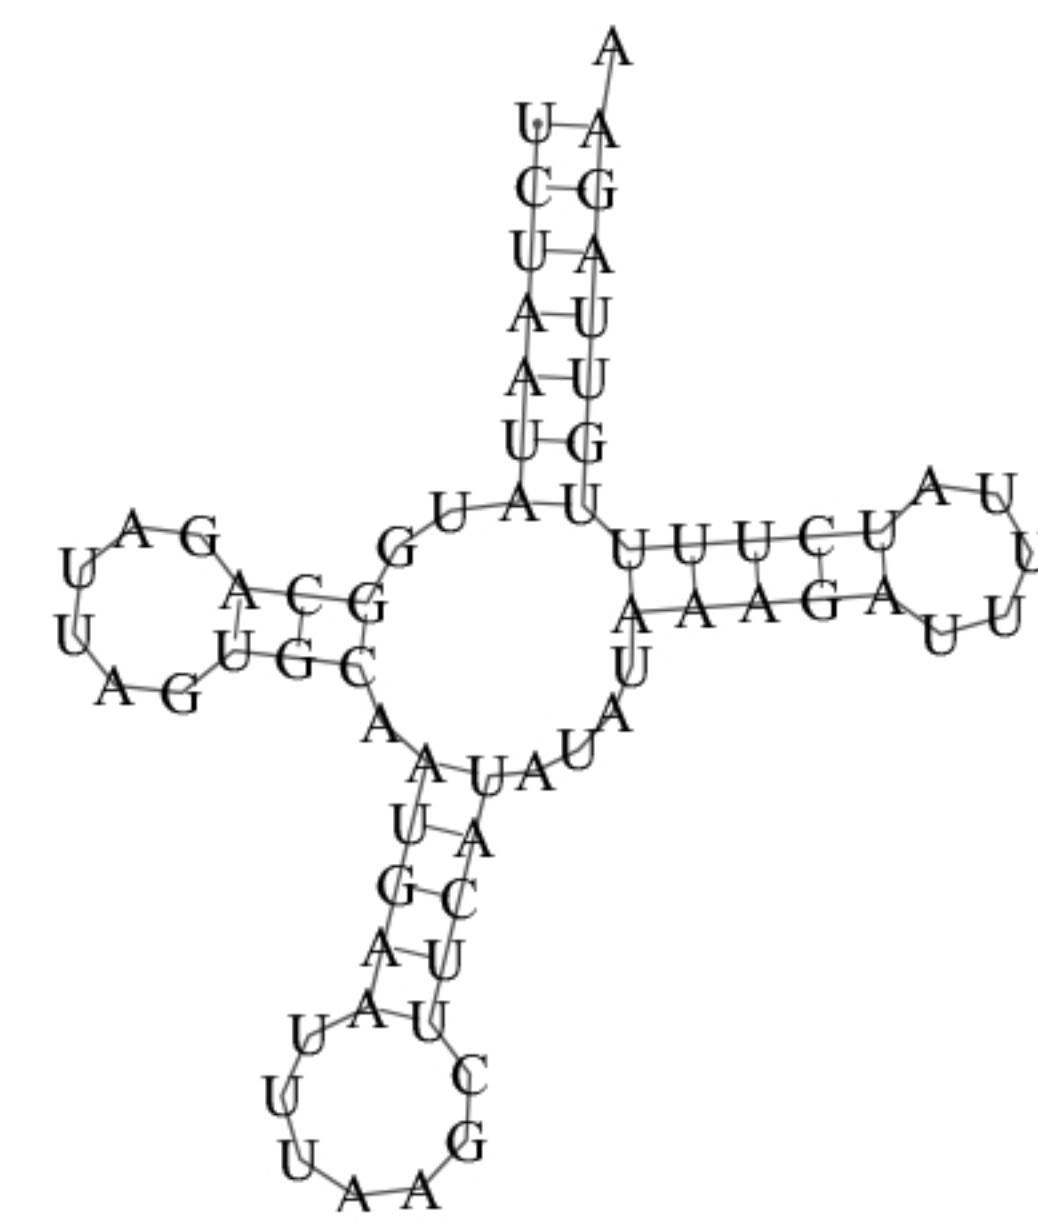

Lysine(cuu)

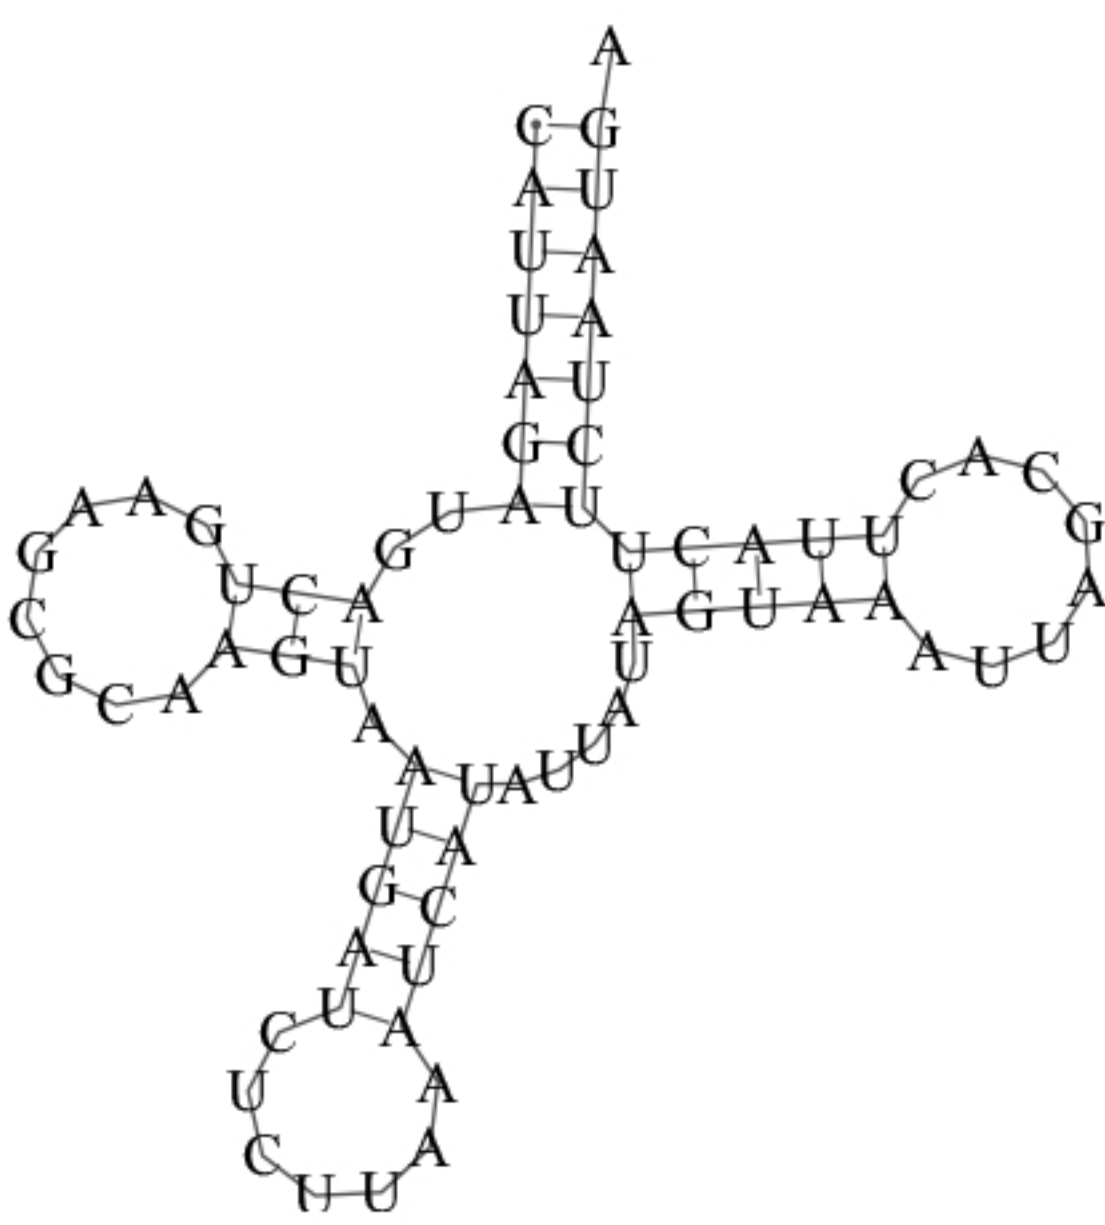

Methionine(cau)

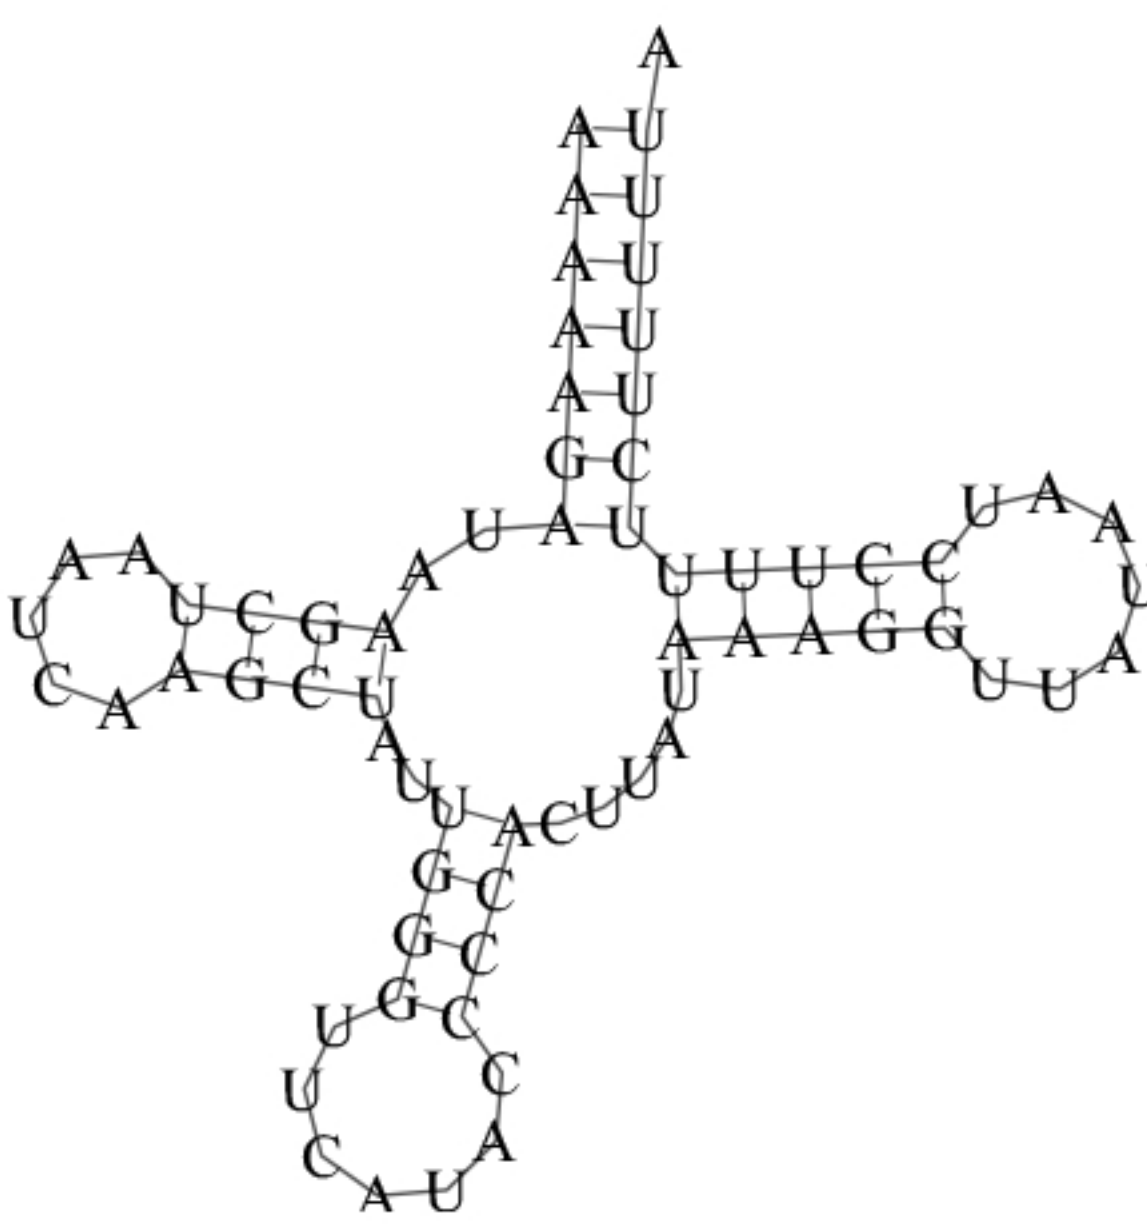

Phenylalanine(gaa)

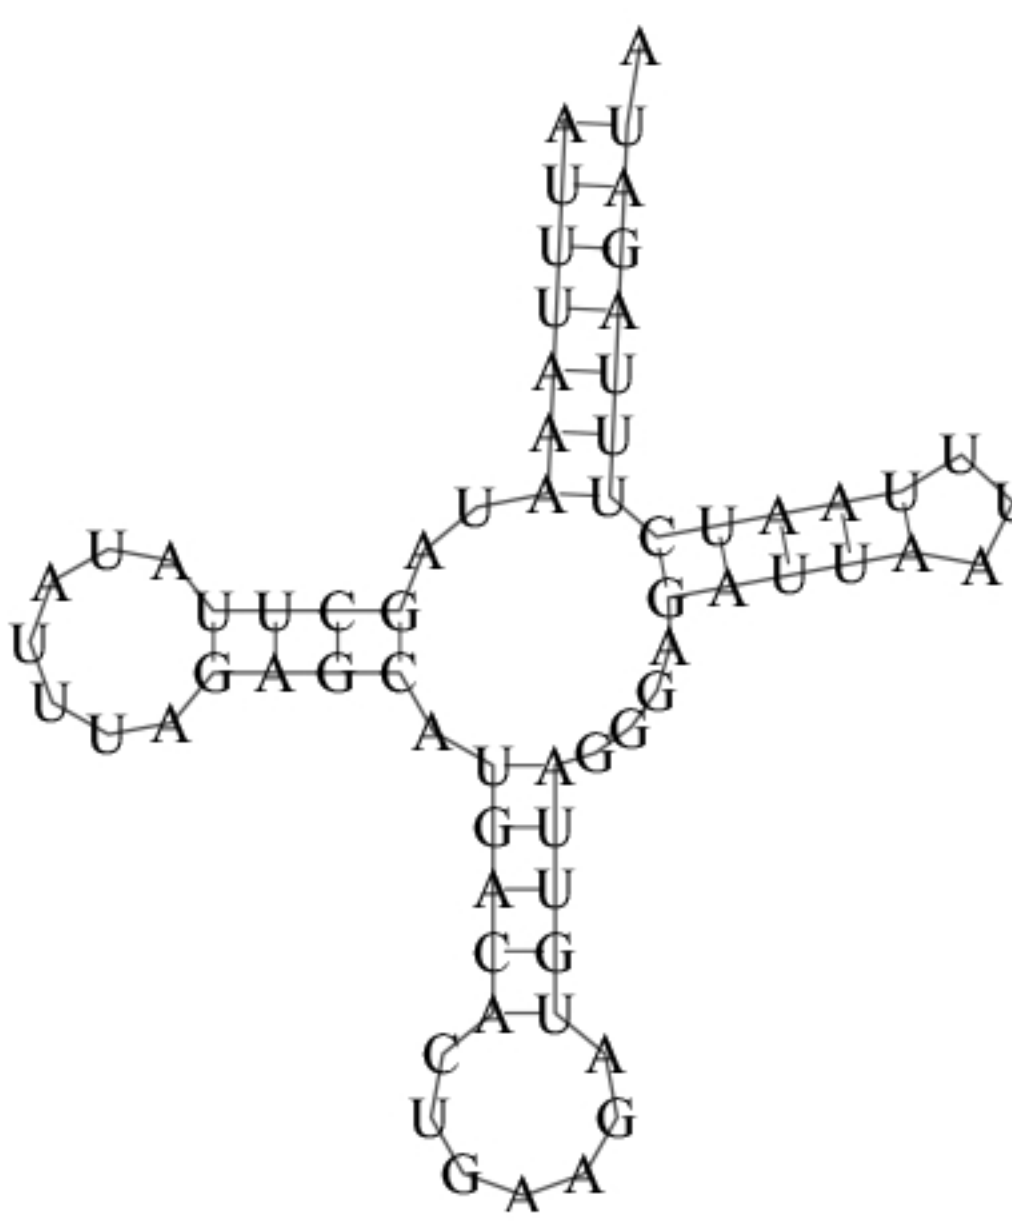

Proline(ugg)

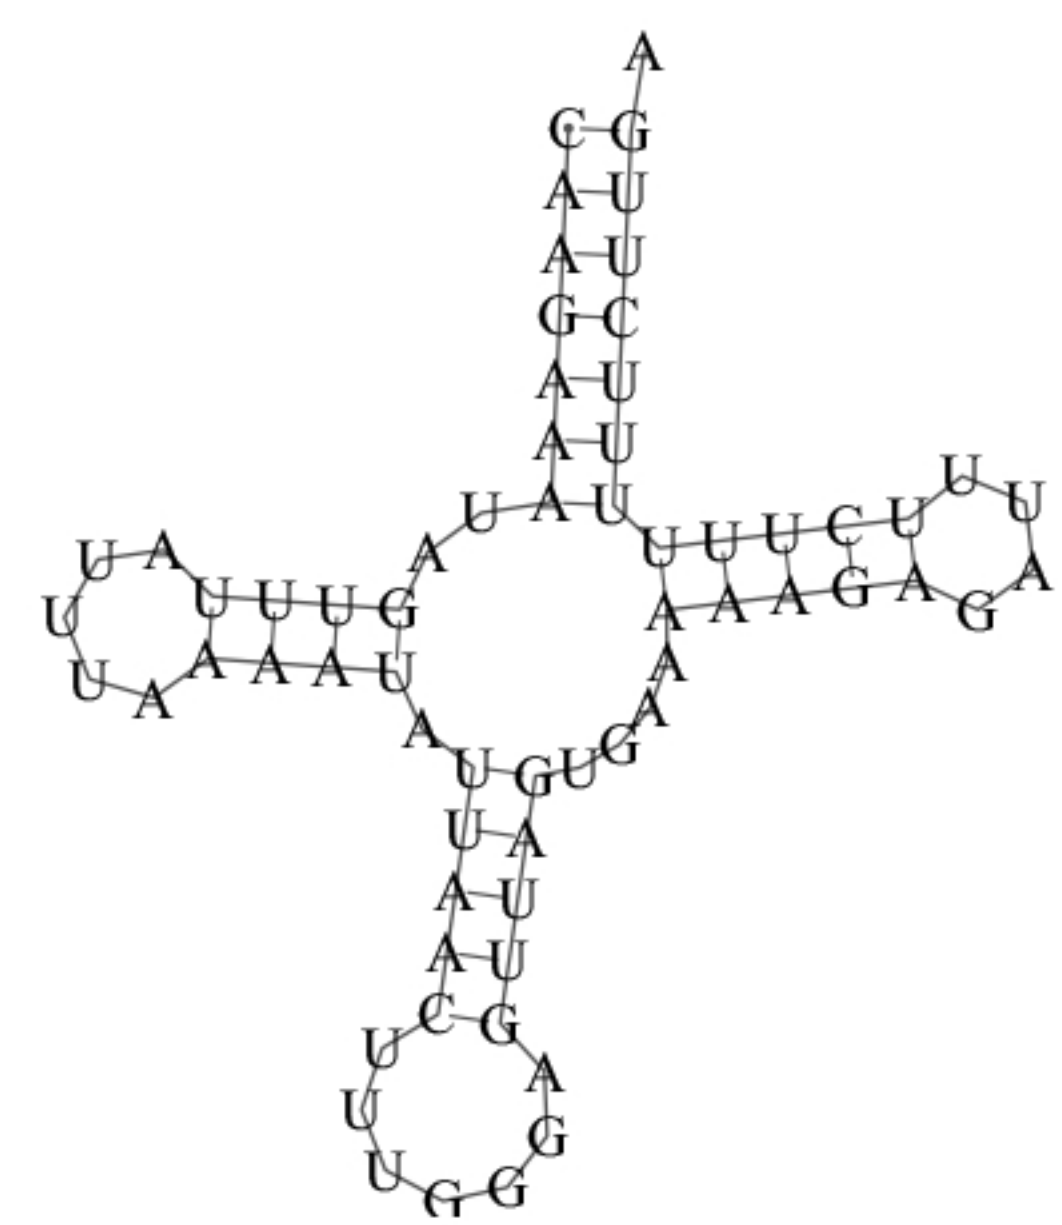

Serine(gcu)

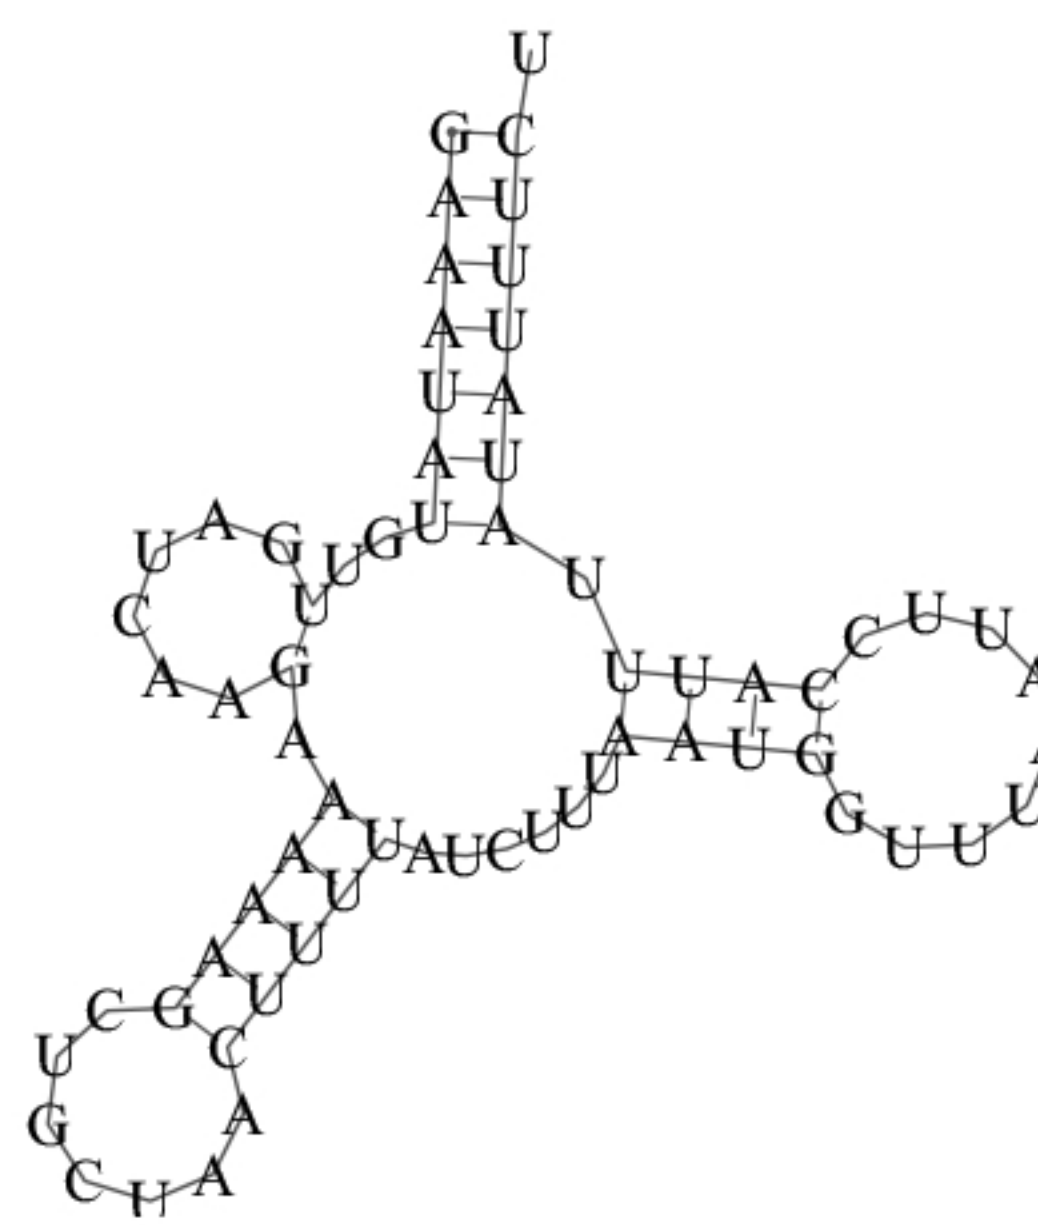

Serine(uga)

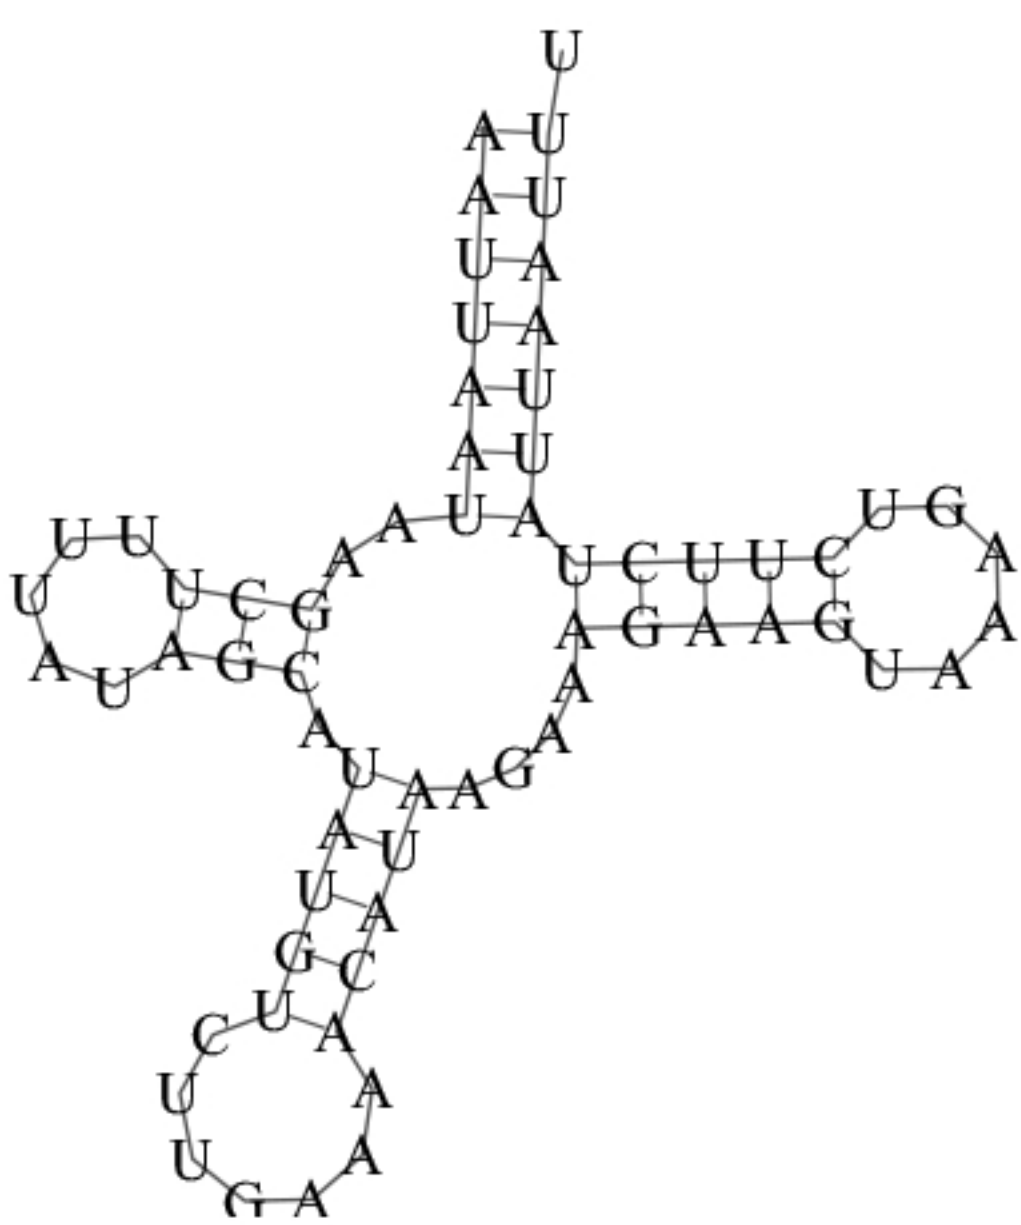

Threonine(ugu)

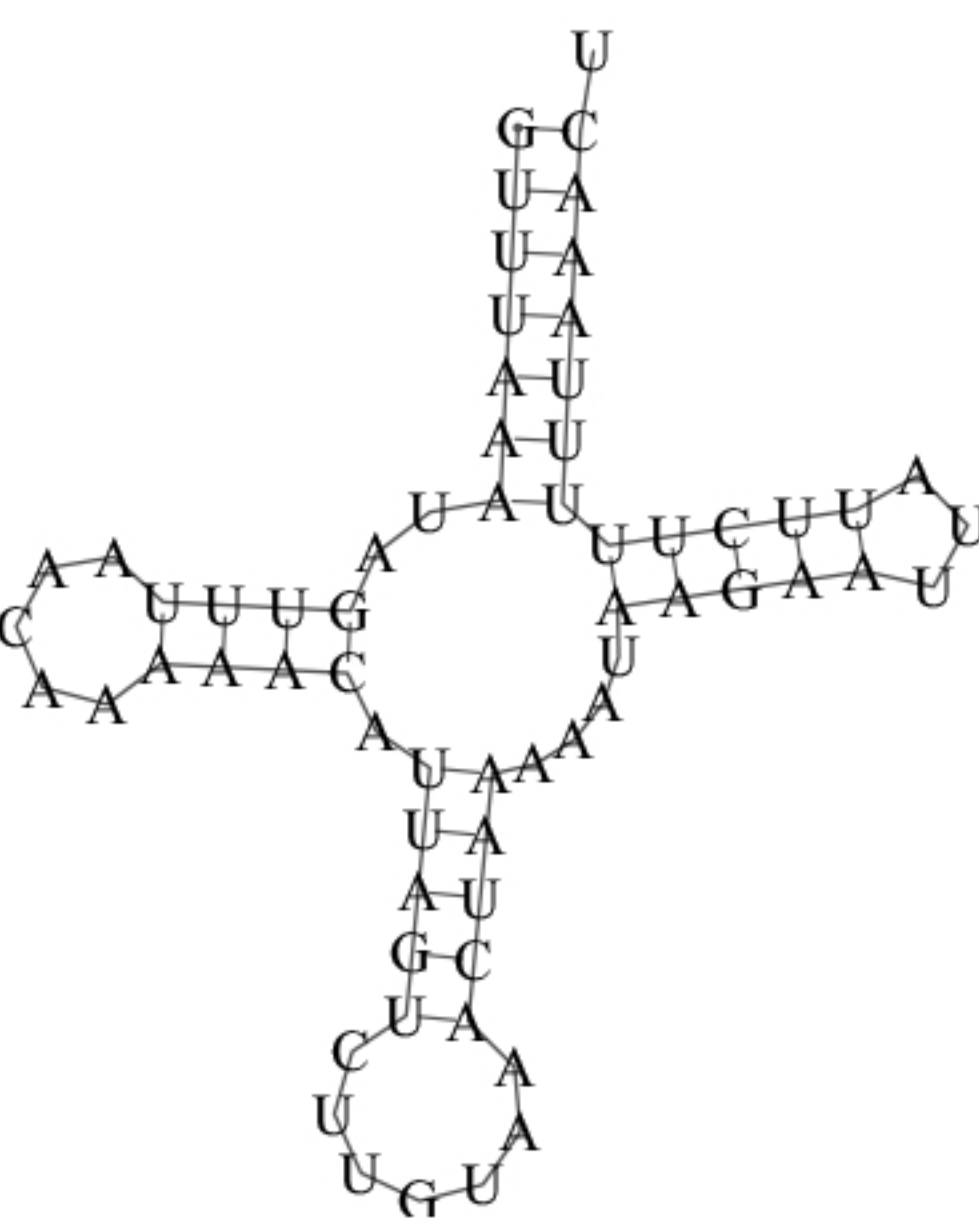

Tryptophan(uca)

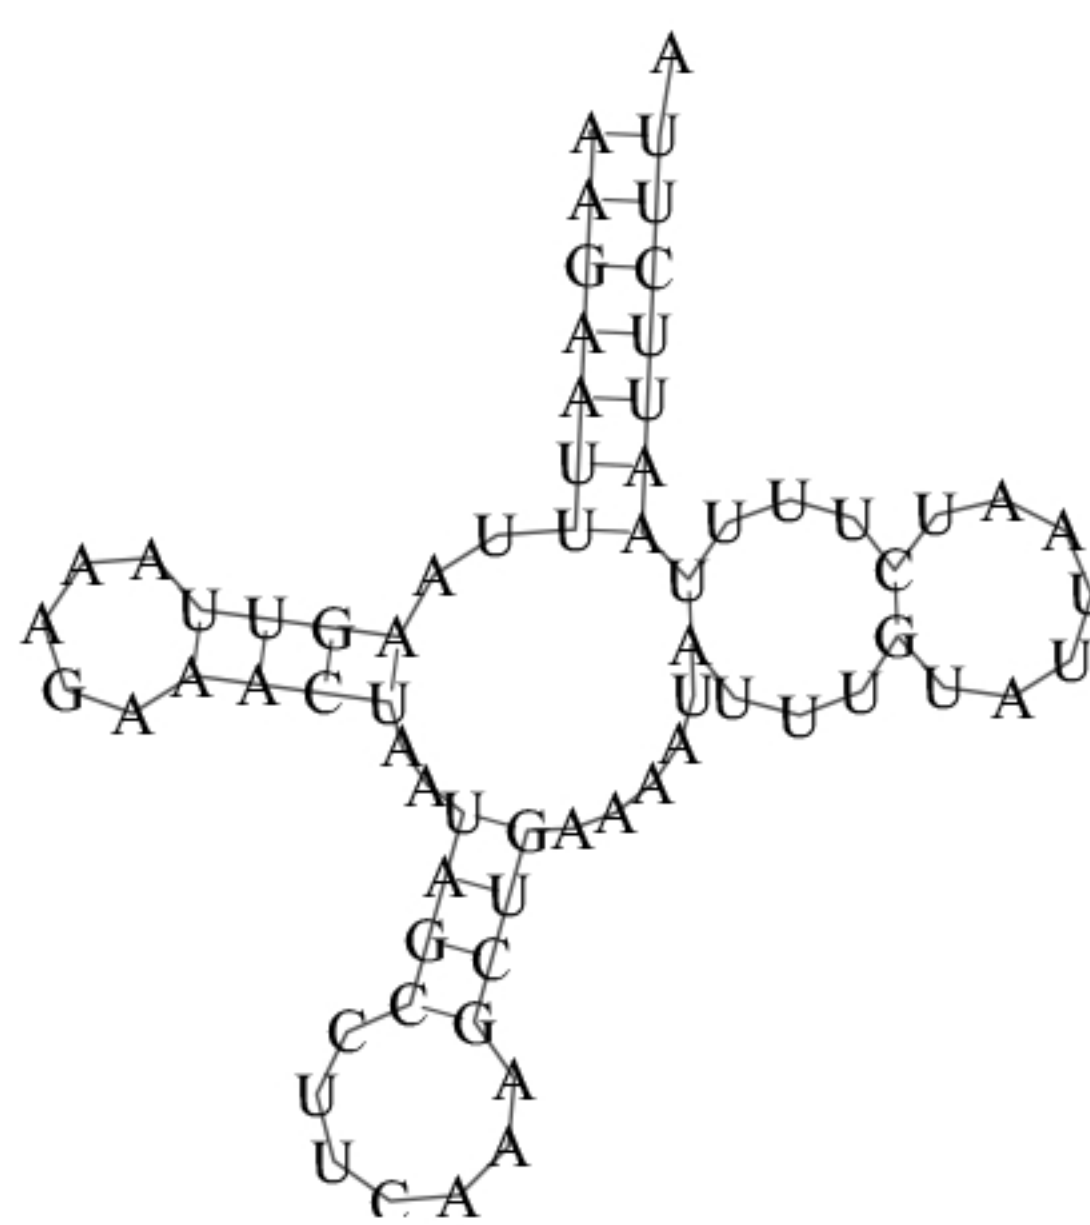

Tyrosine(gua)

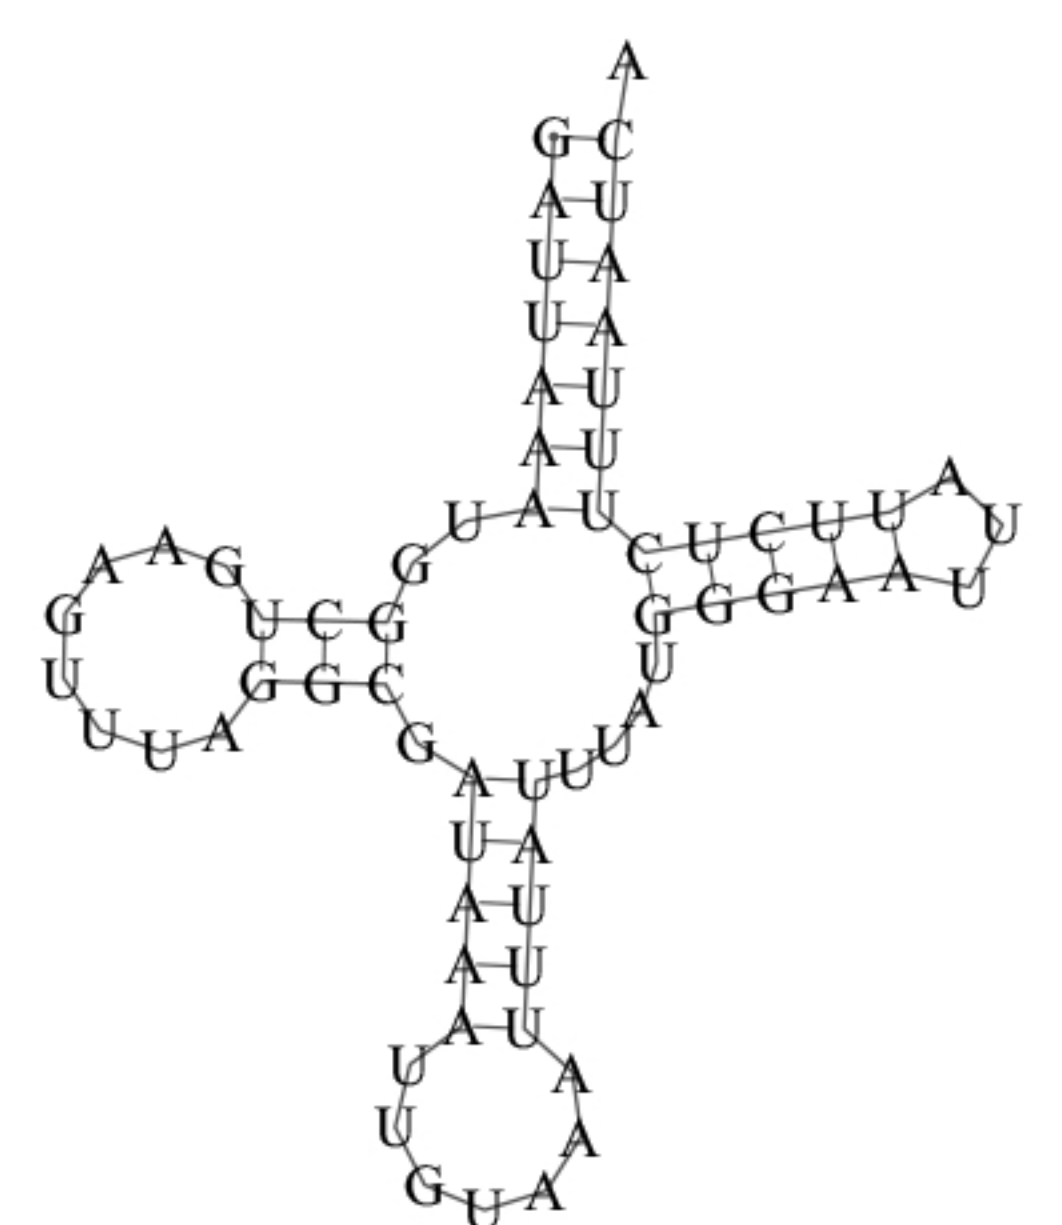

Valine(uac)

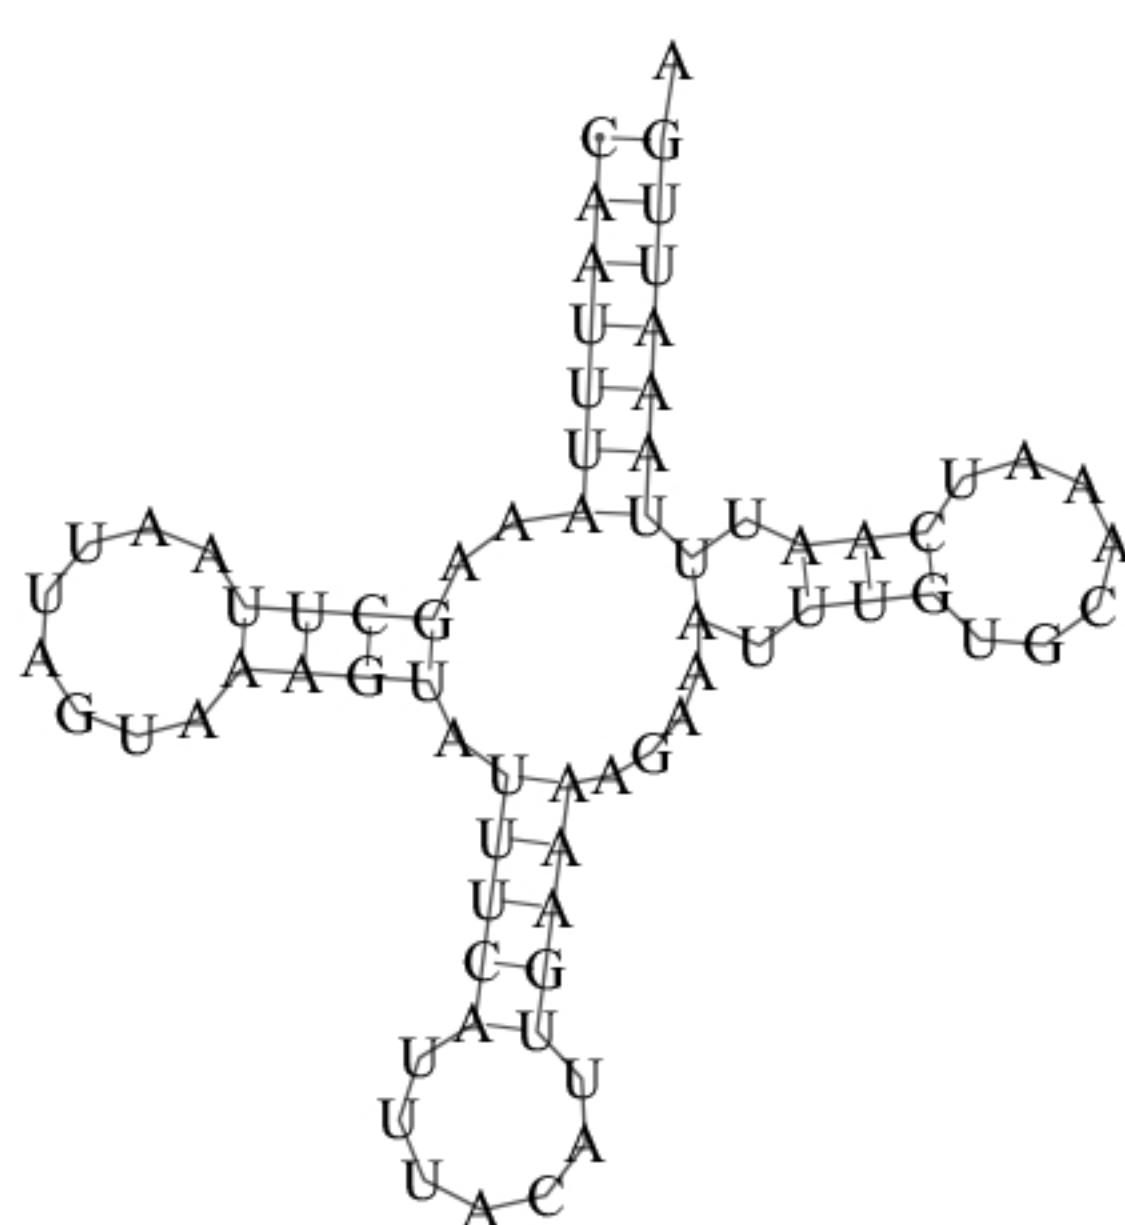



*An. yatsushiroensis*

Alanine(ugc)

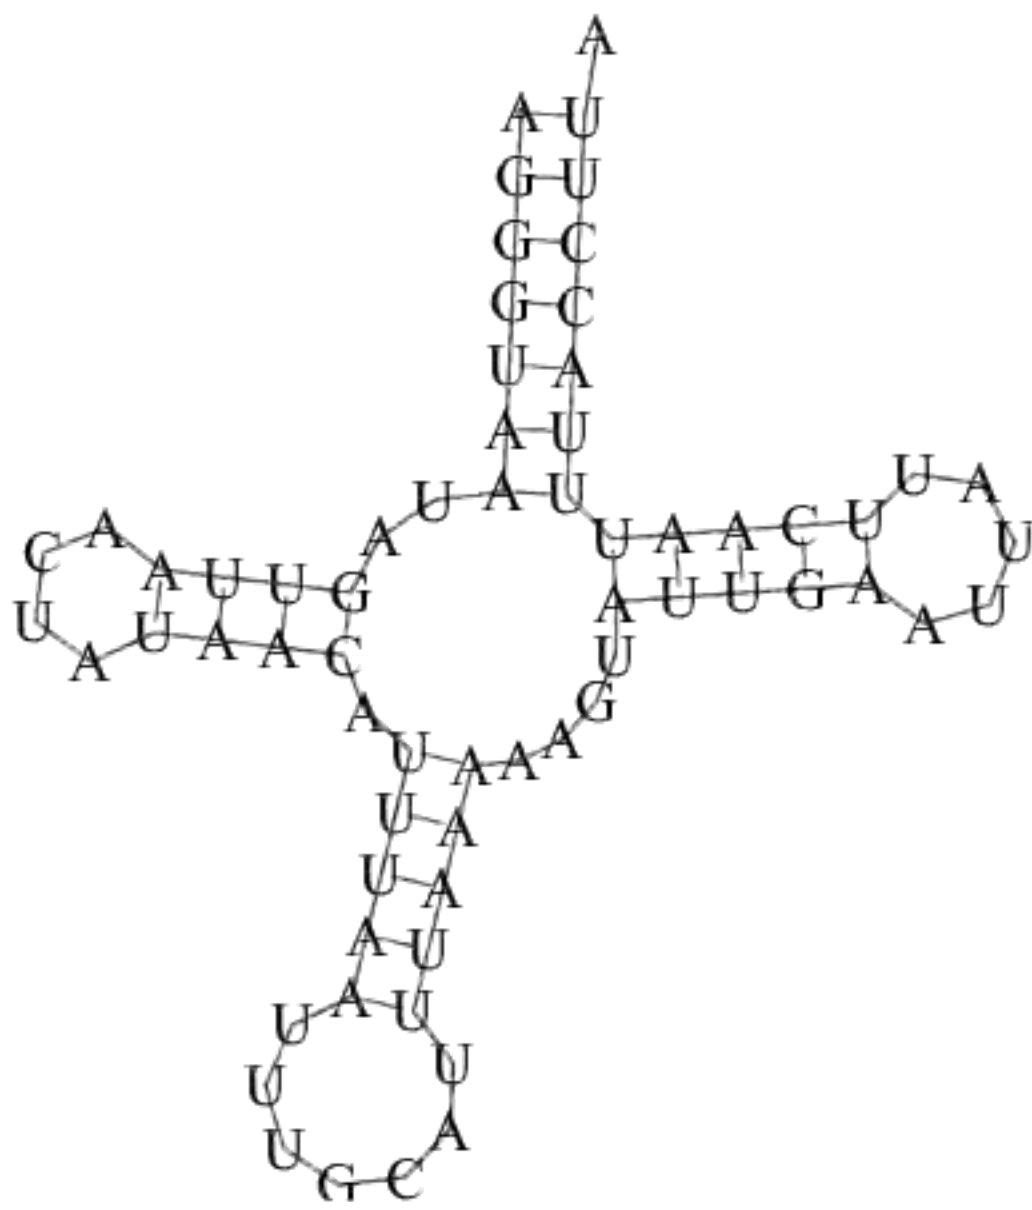

Arginine(ucg)

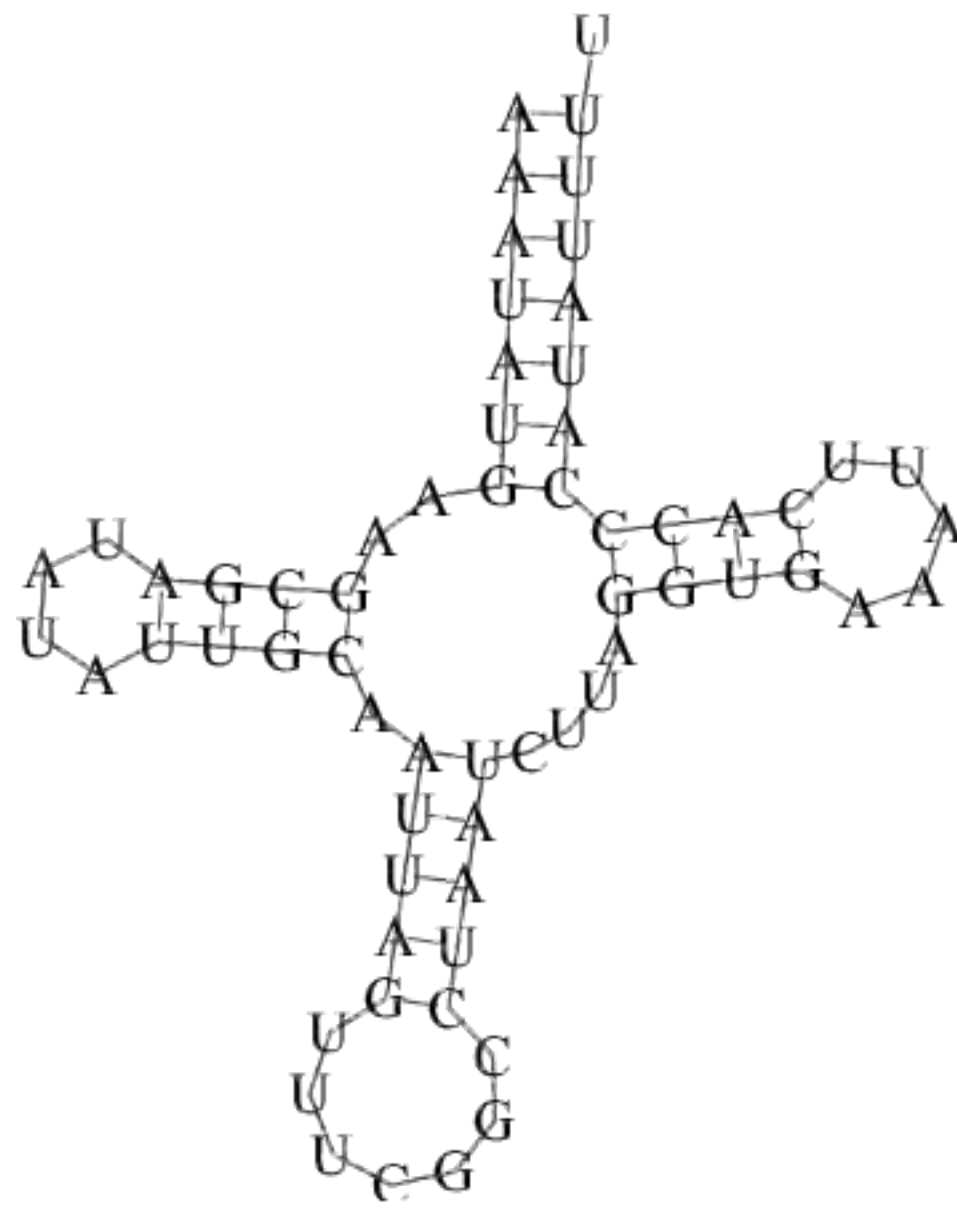

Asparagine(guu)

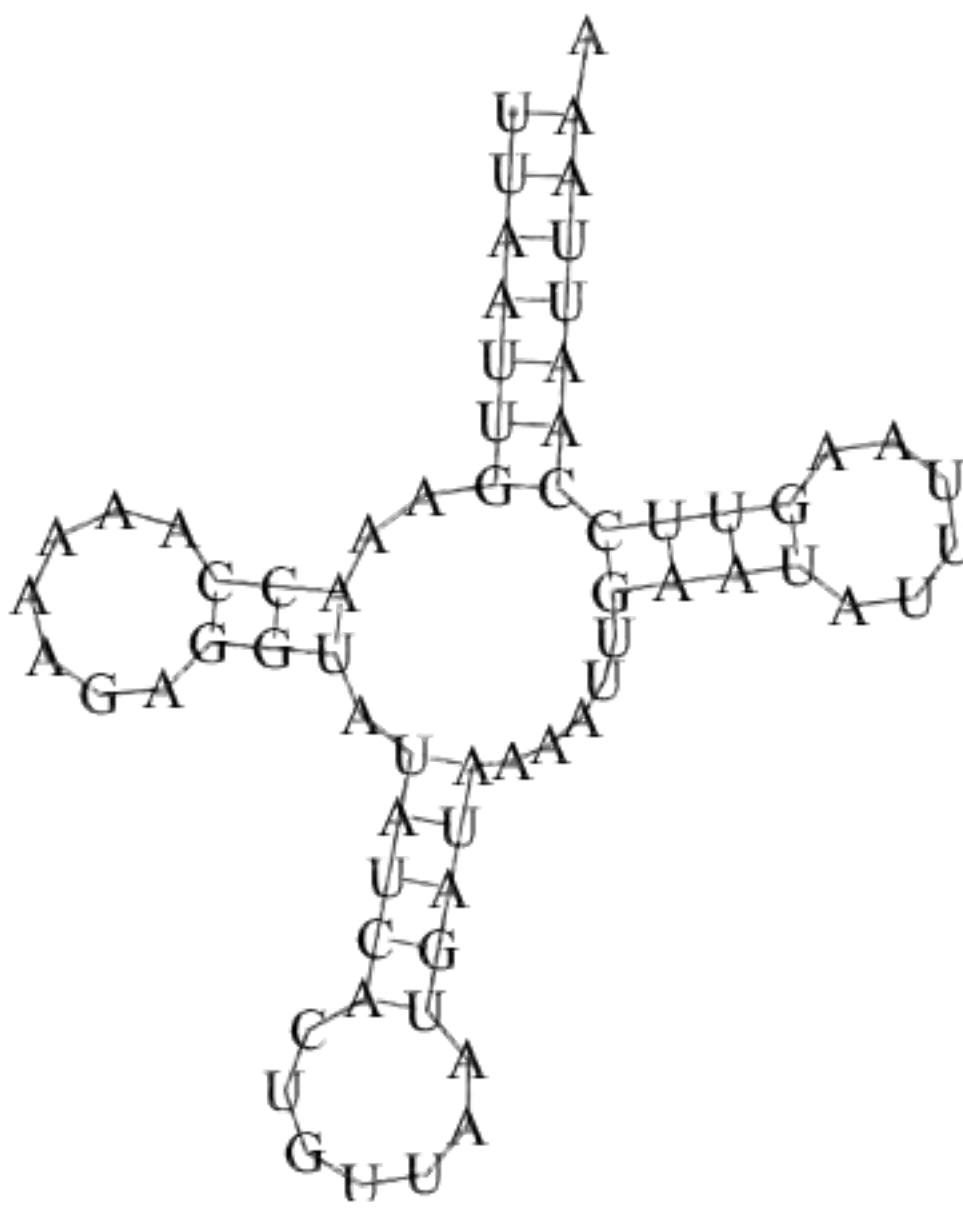

Aspartic acid(guc)

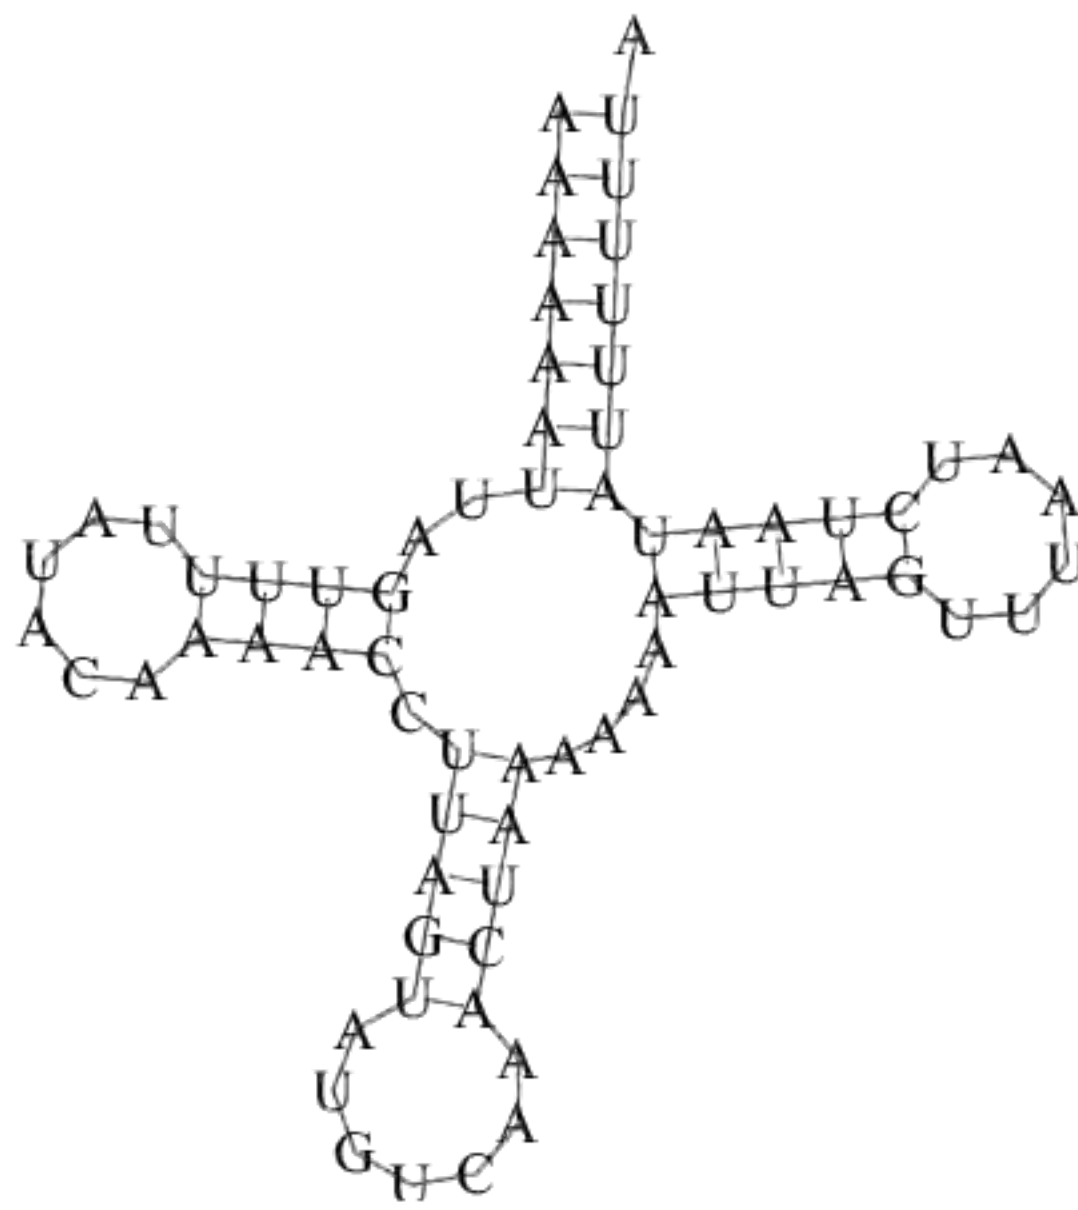

Cysteine(gca)

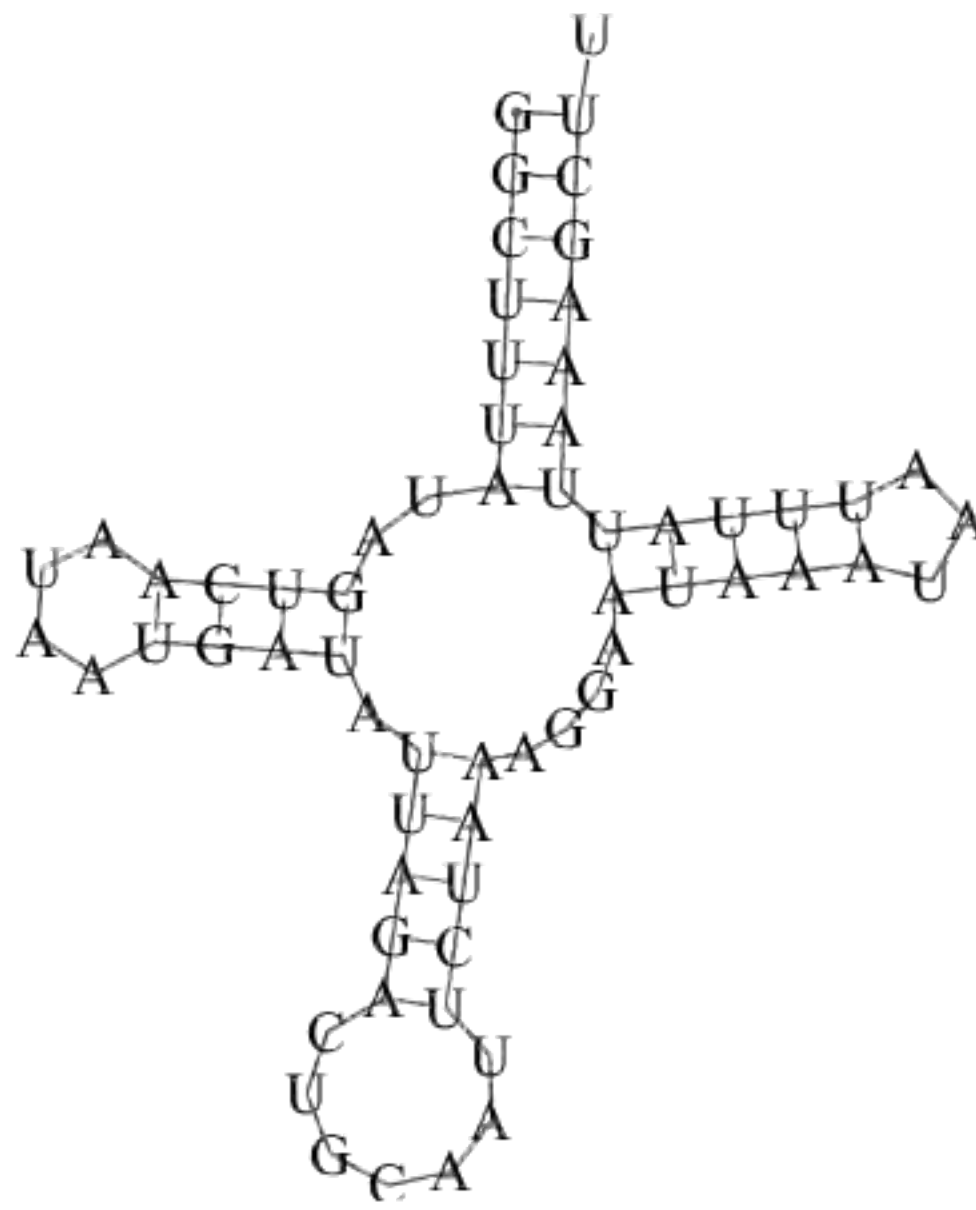

Glutamine(uuc)

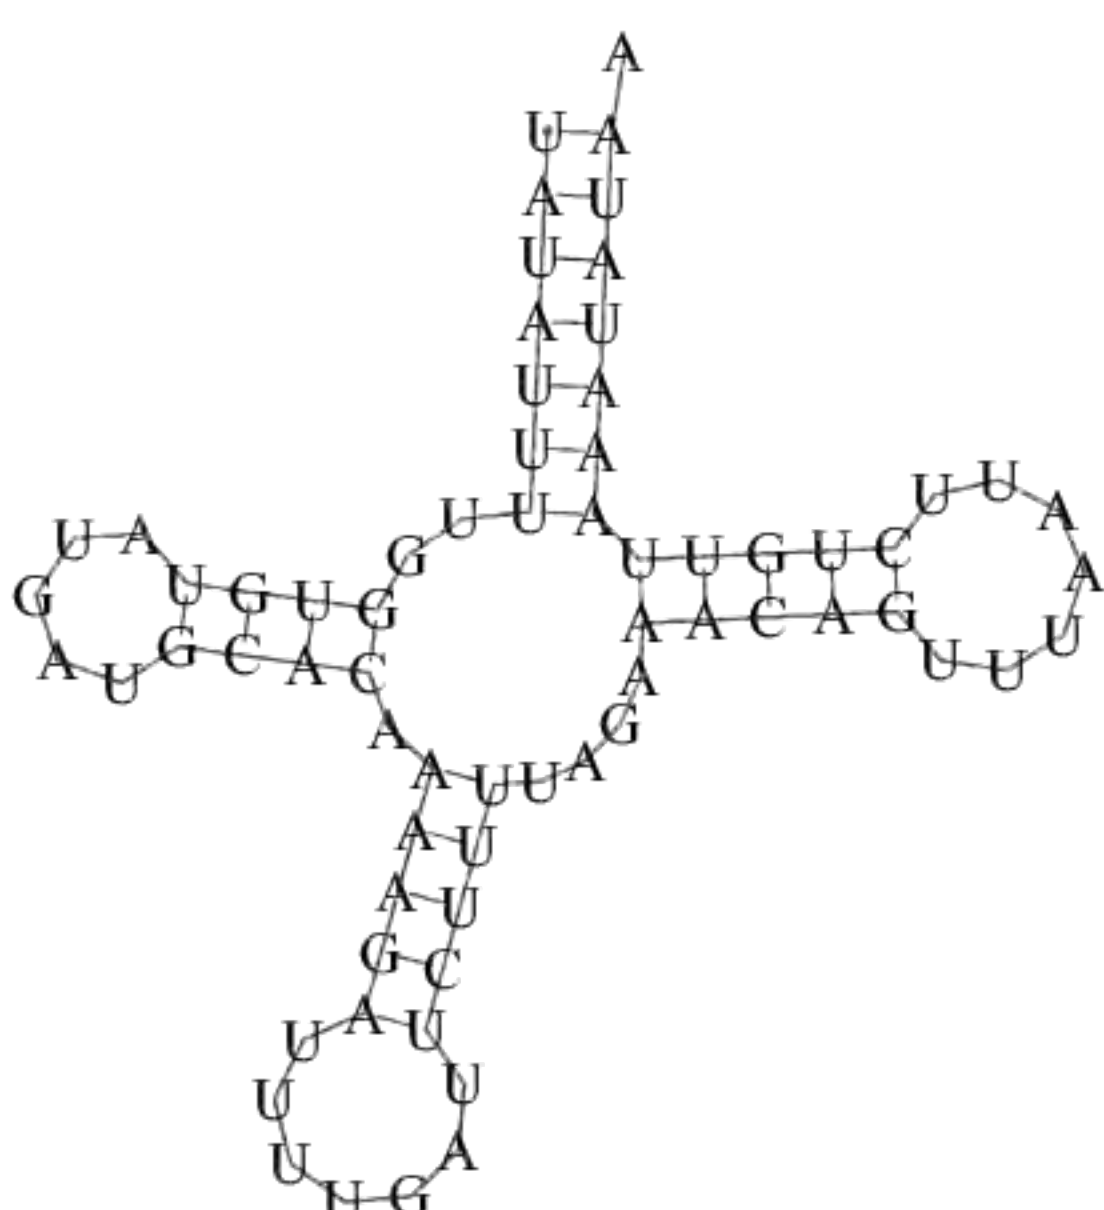

Glutamic acid(uug)

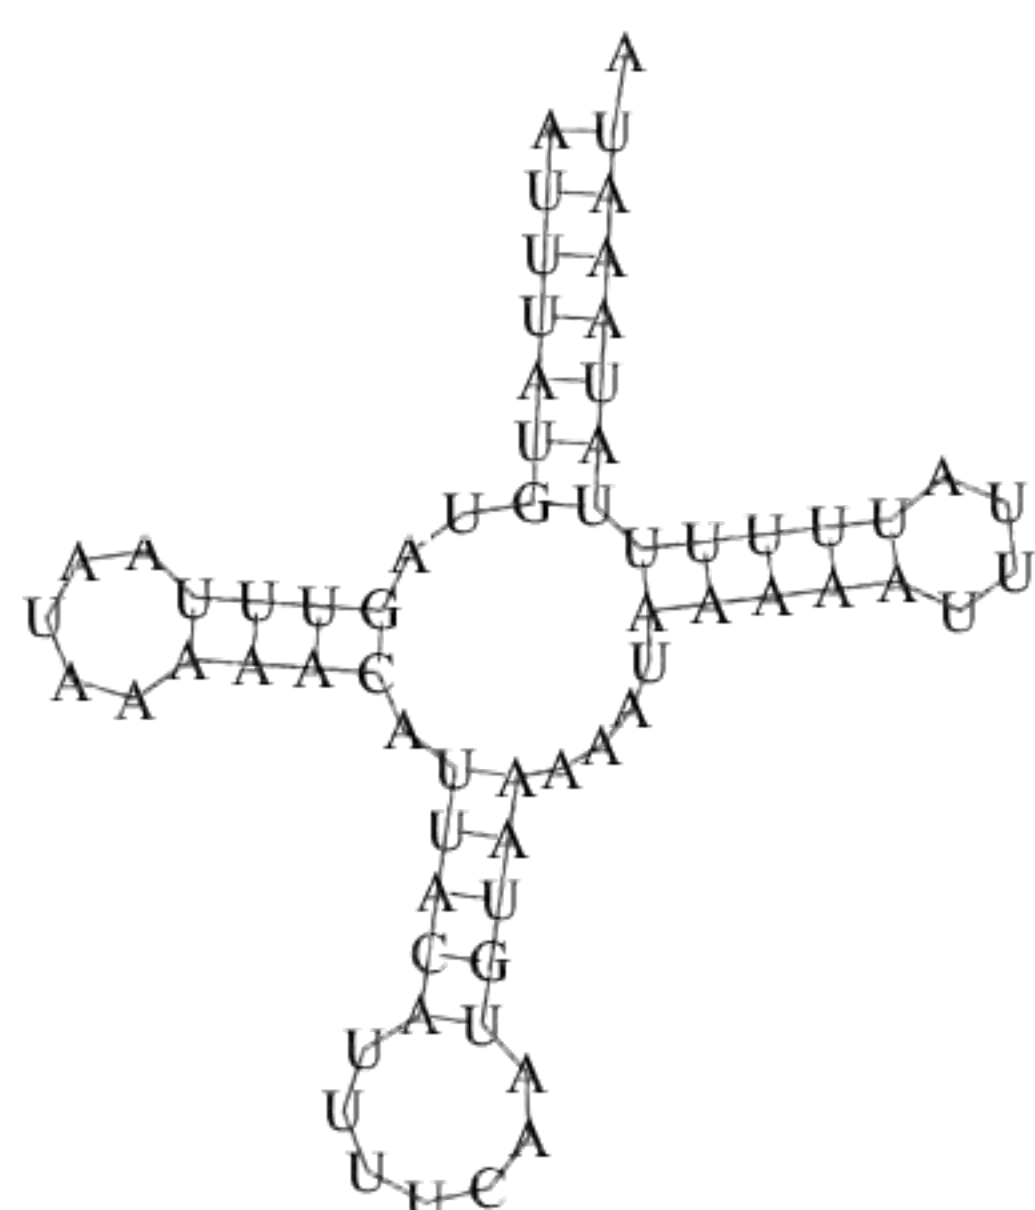

Glycine(ucc)

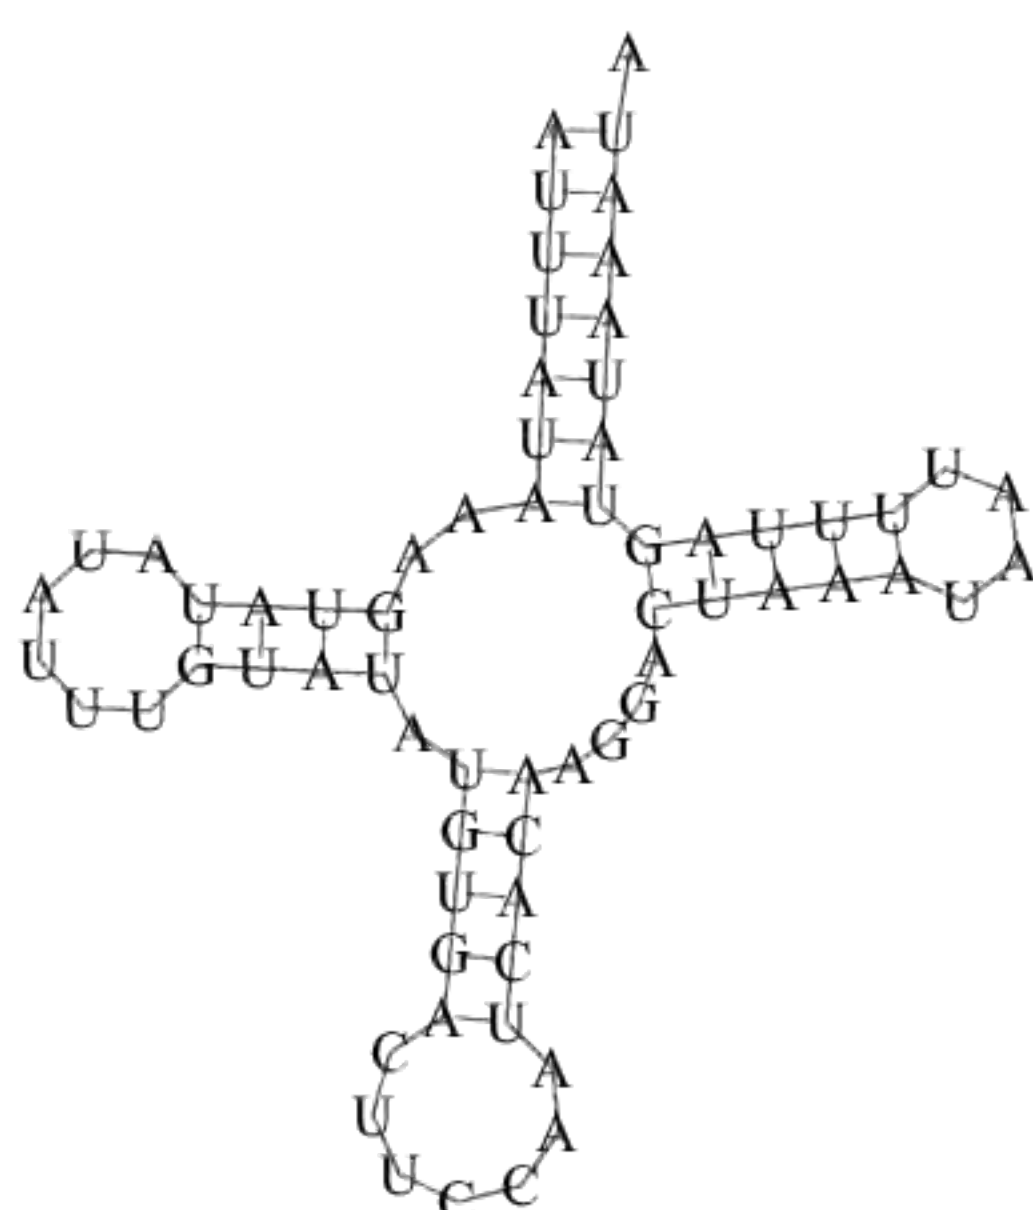

Histidine(gug)

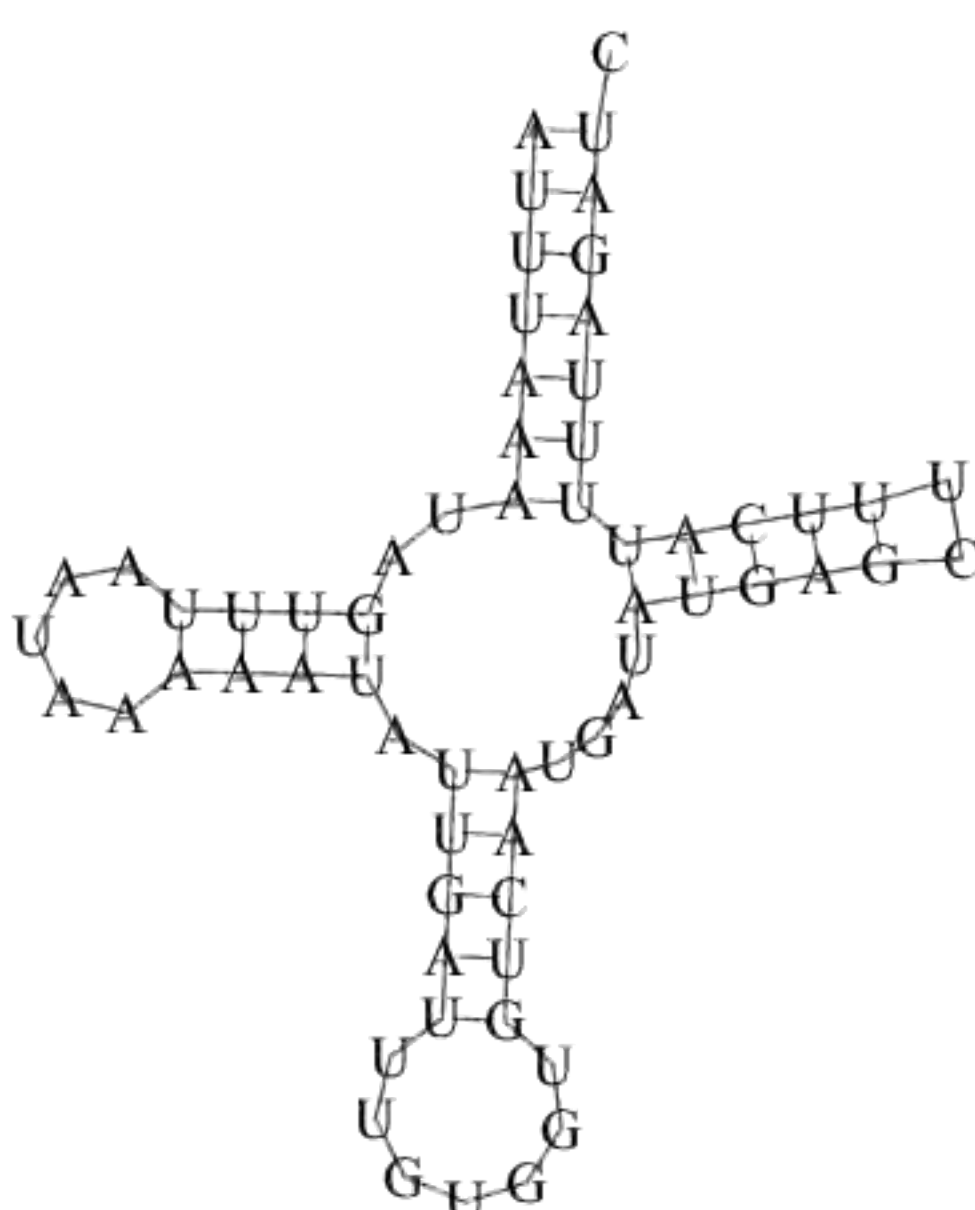

Isoleucine(gau)

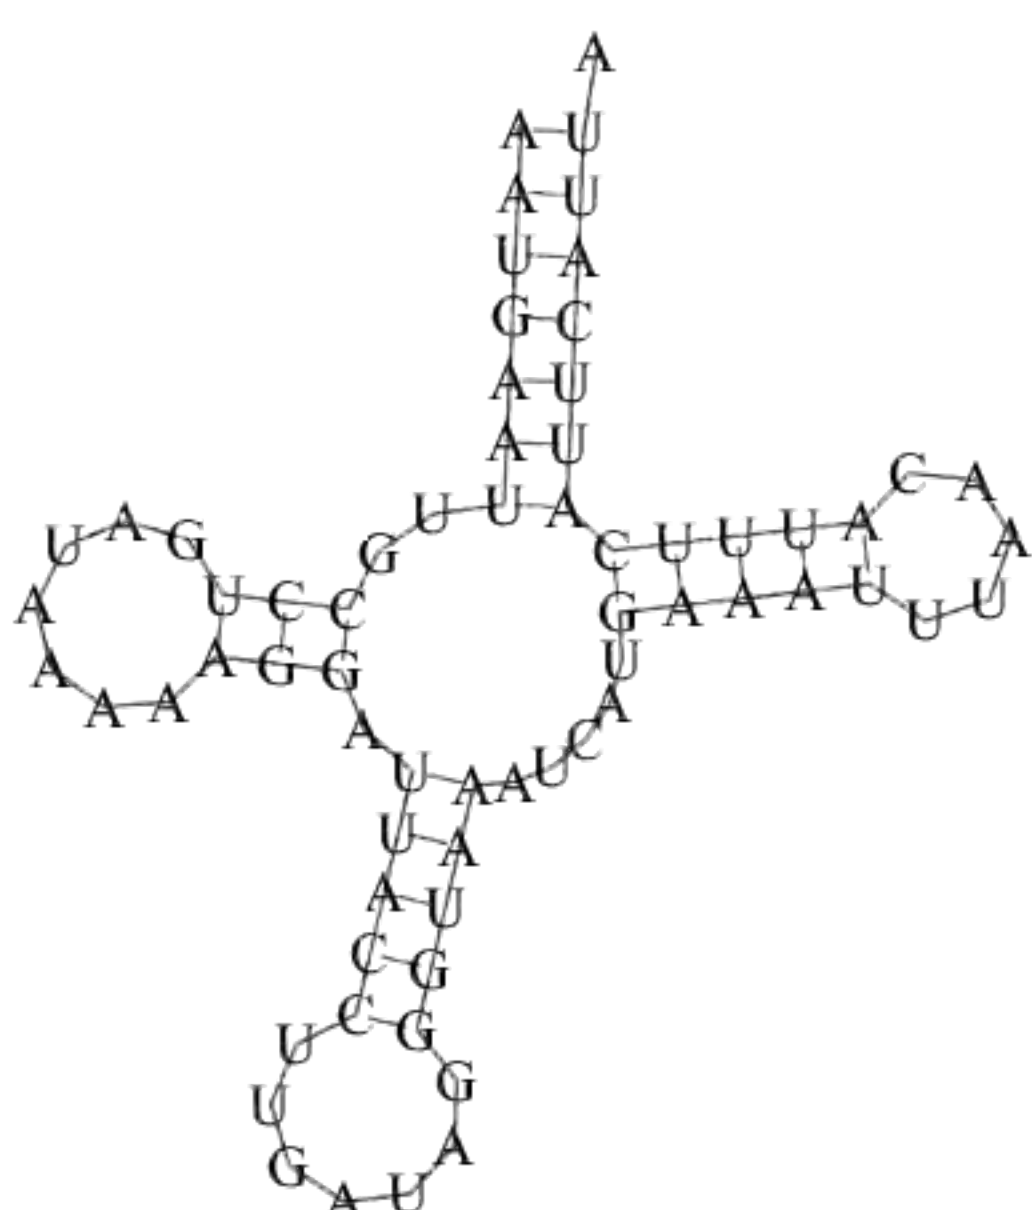

Leucine(uag)

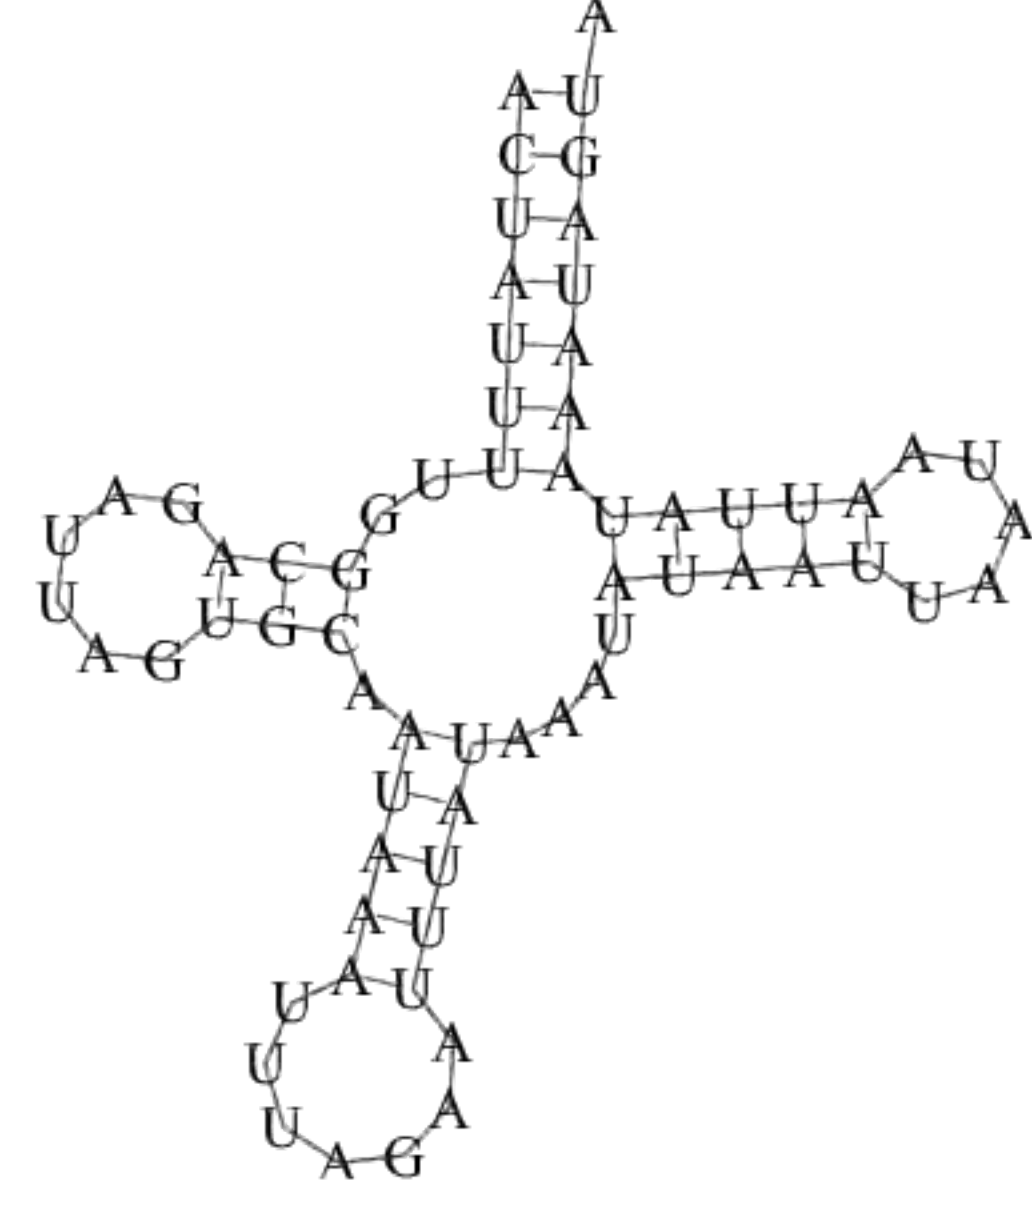

Leucine(uaa)

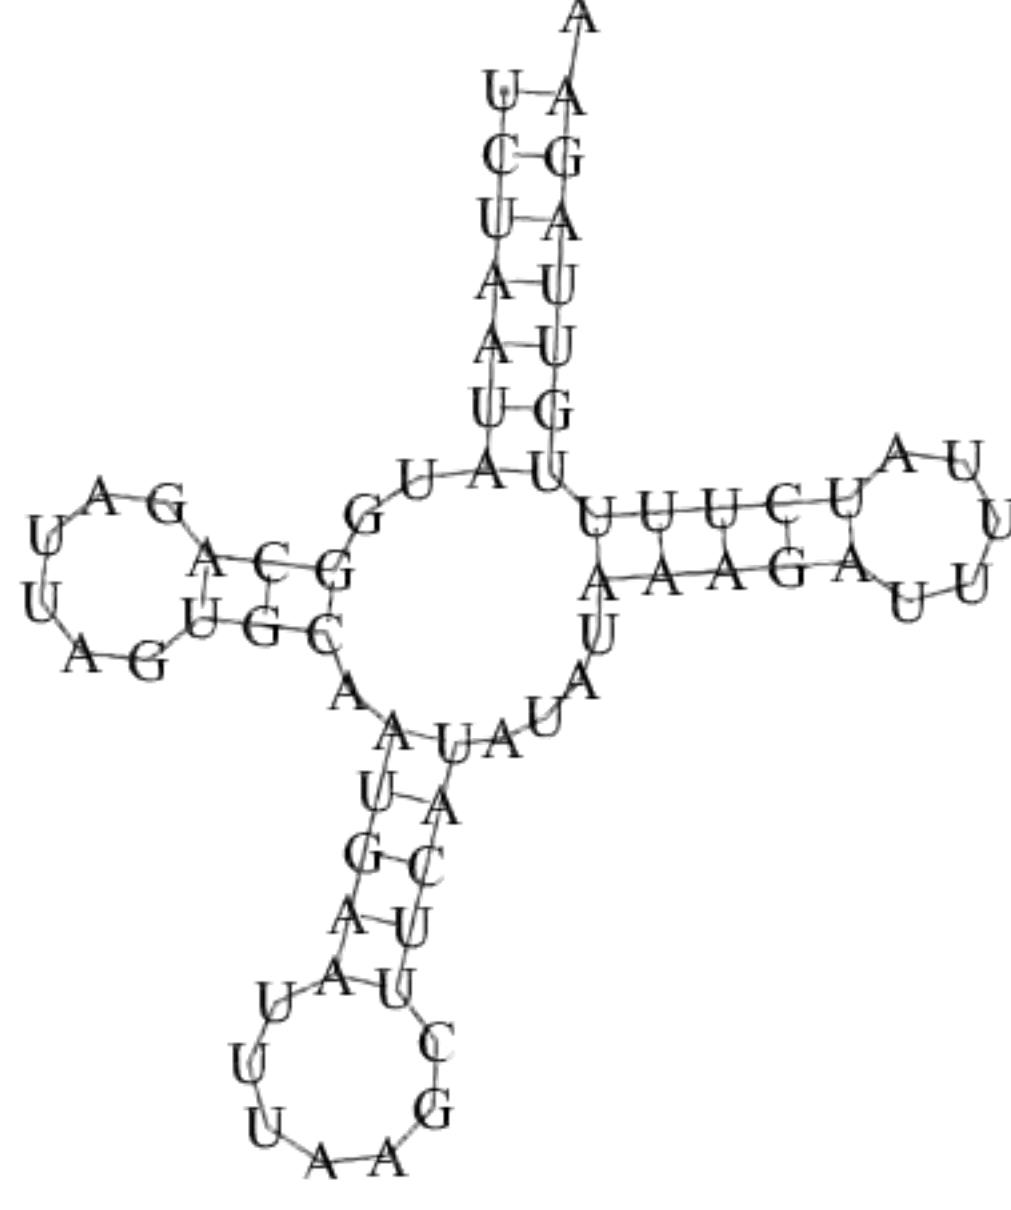

Lysine(cuu)

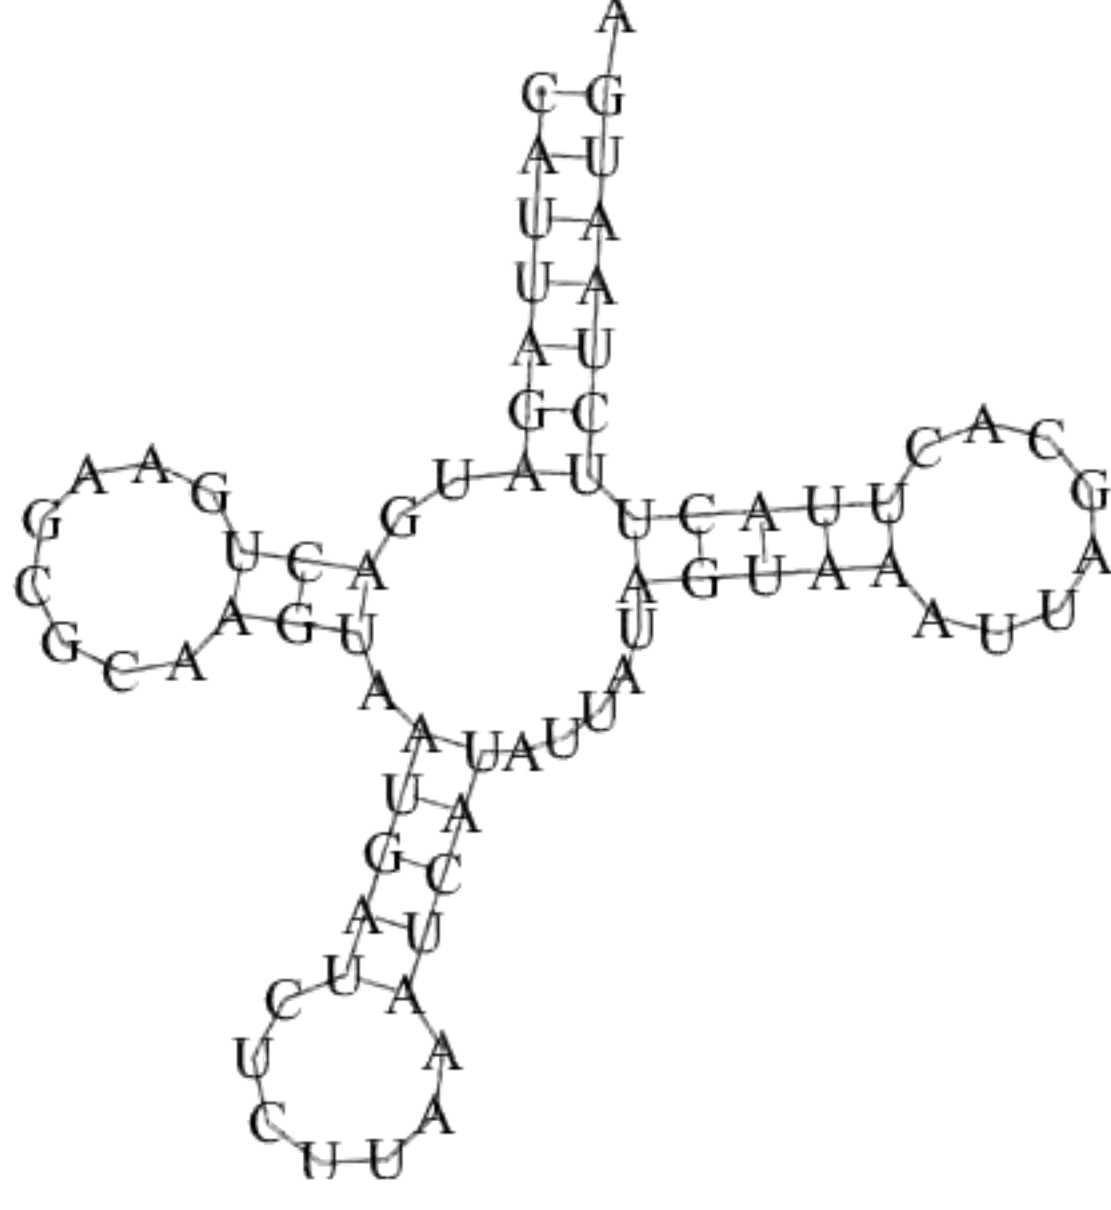

Methionine(cau)

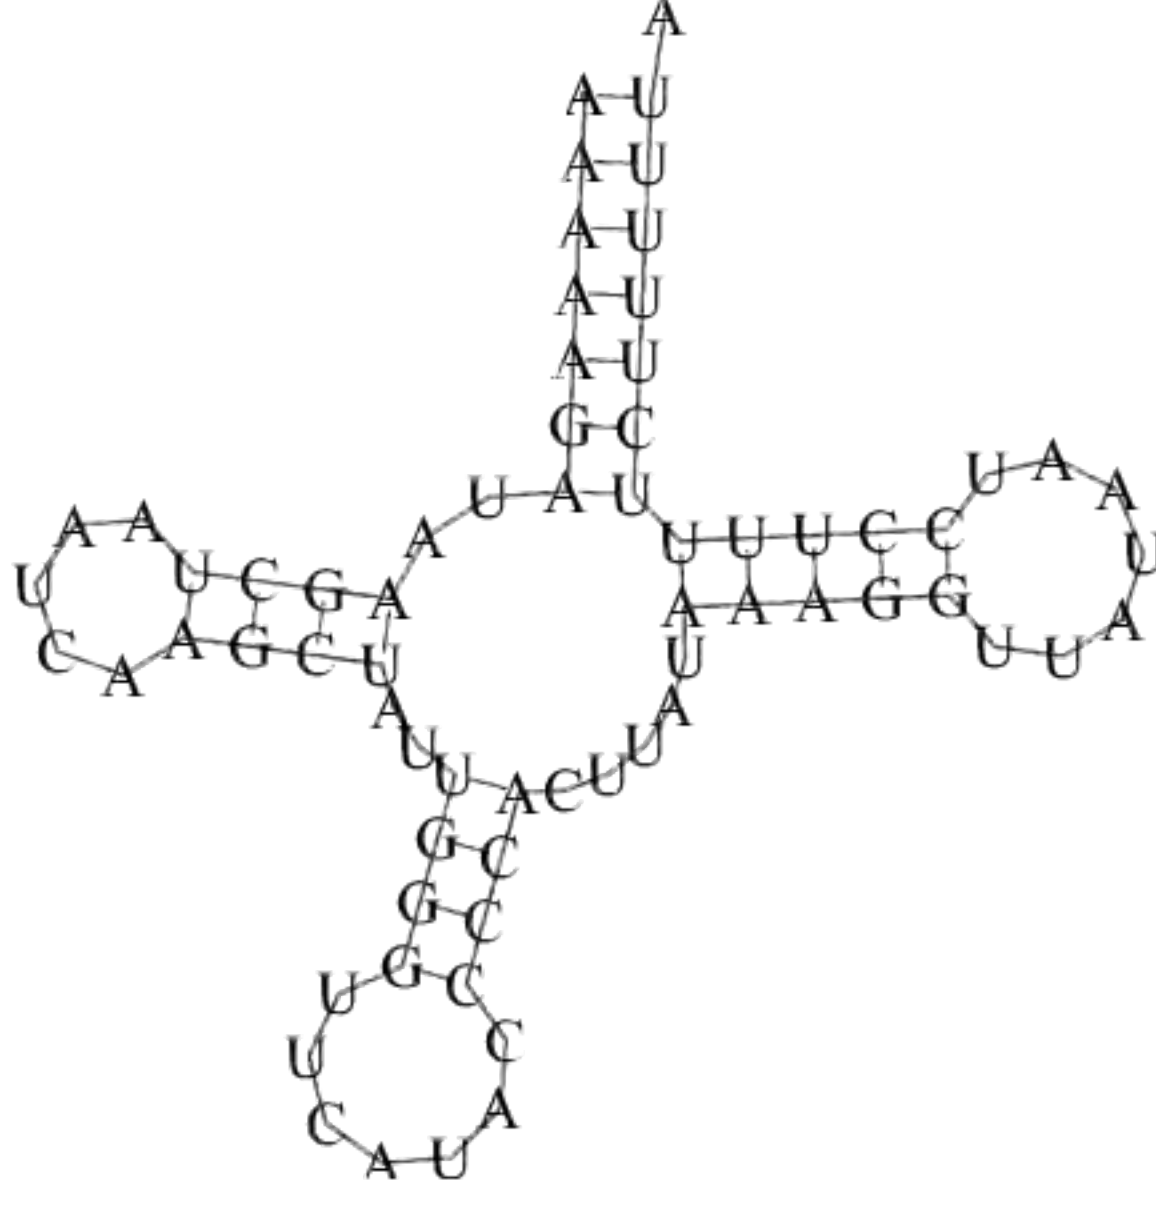

Phenylalanine(gaa)

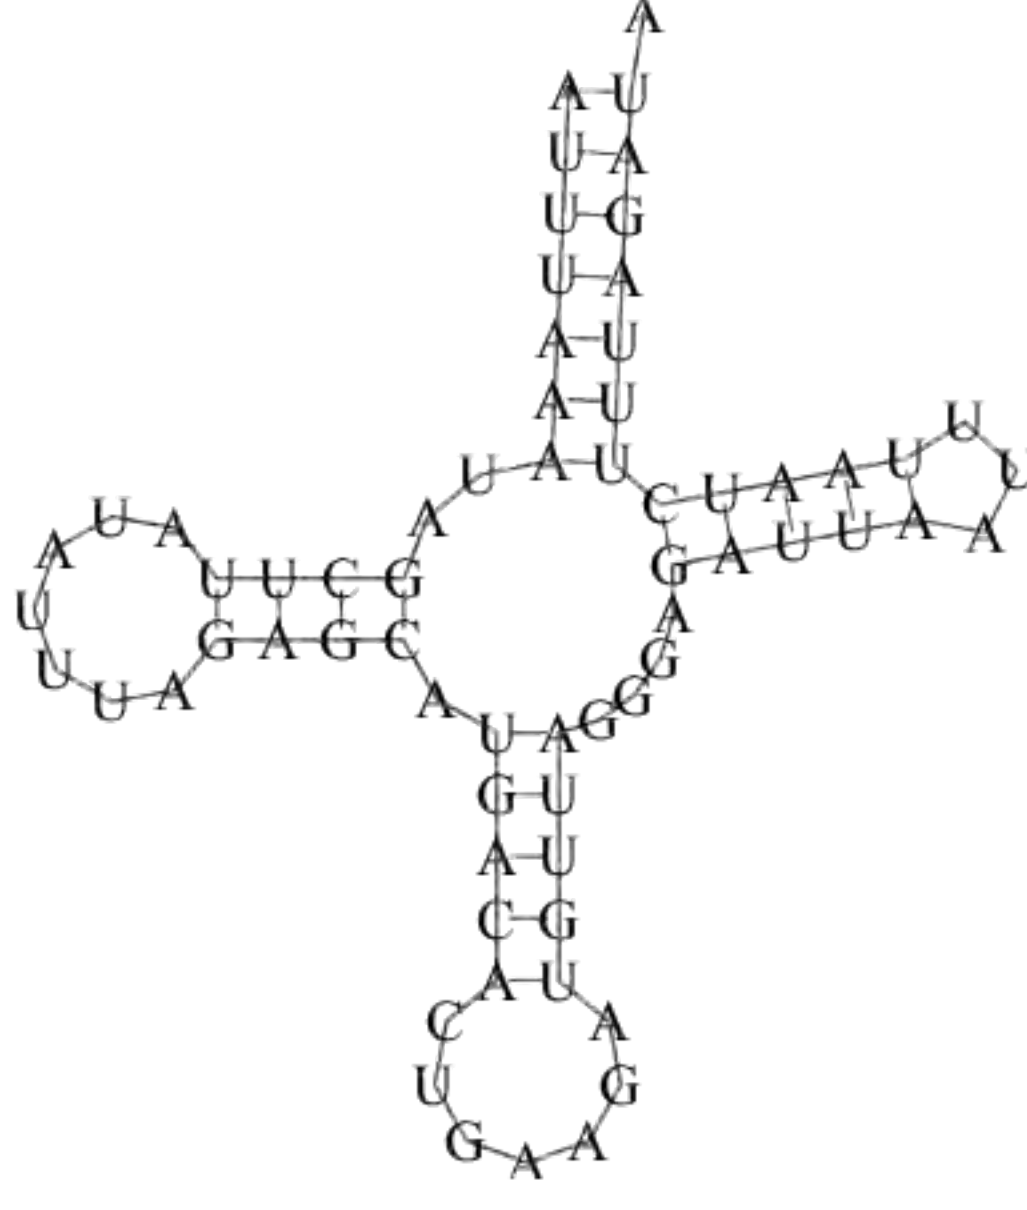

Proline(ugg)

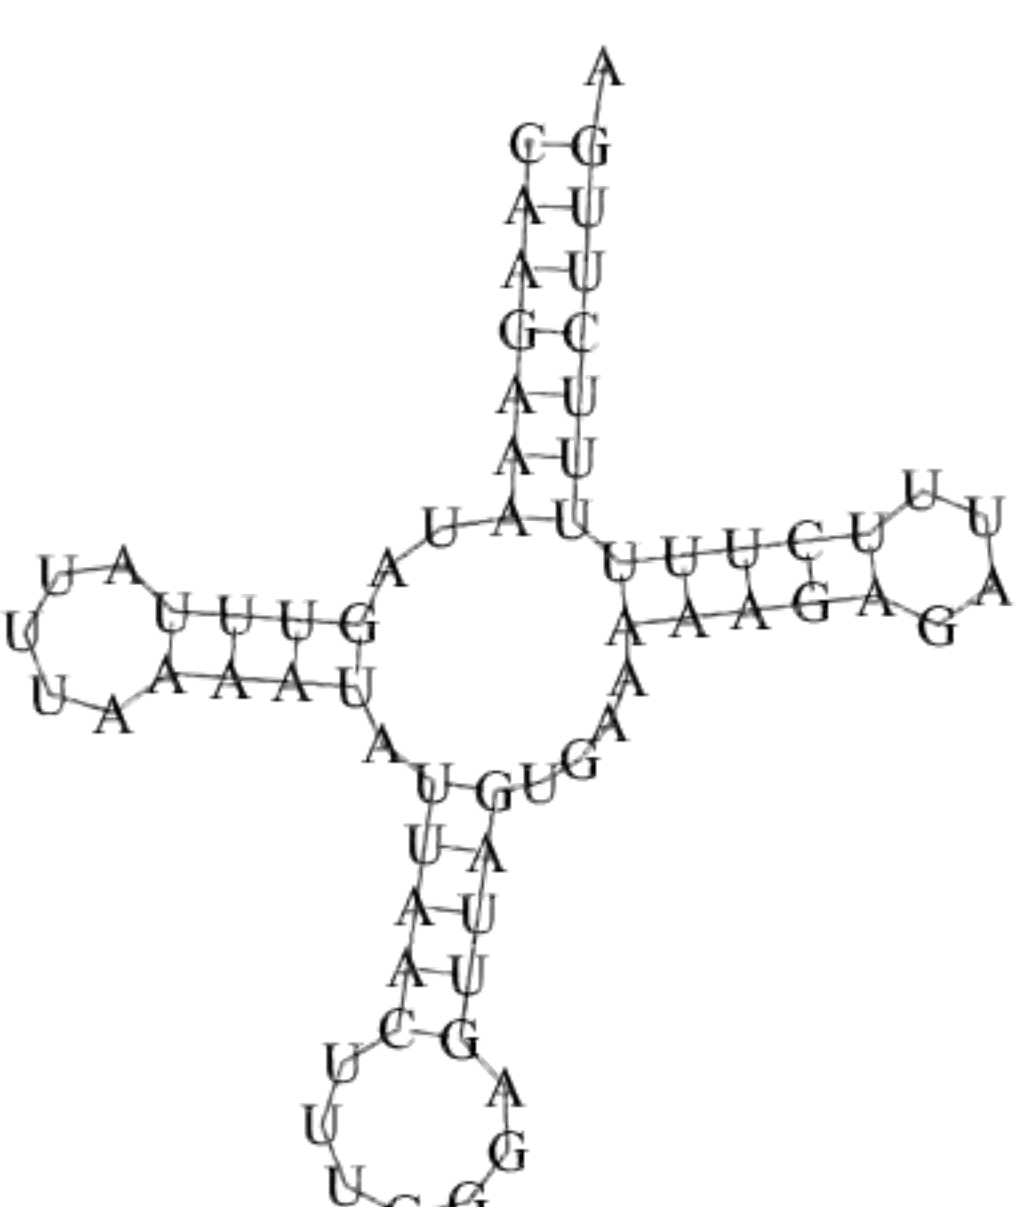

Serine(gcu)

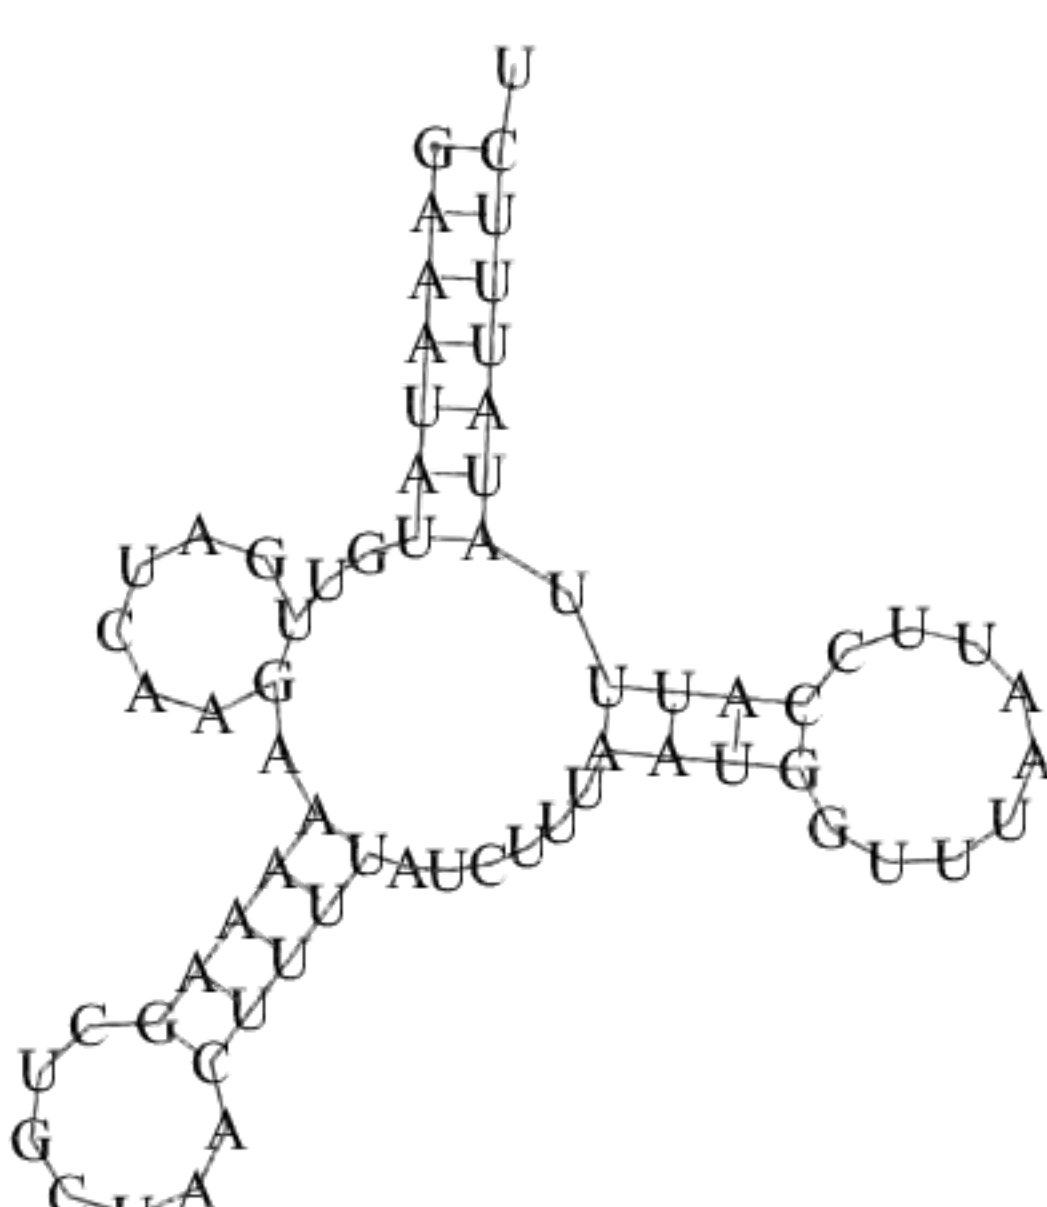

Serine(uga)

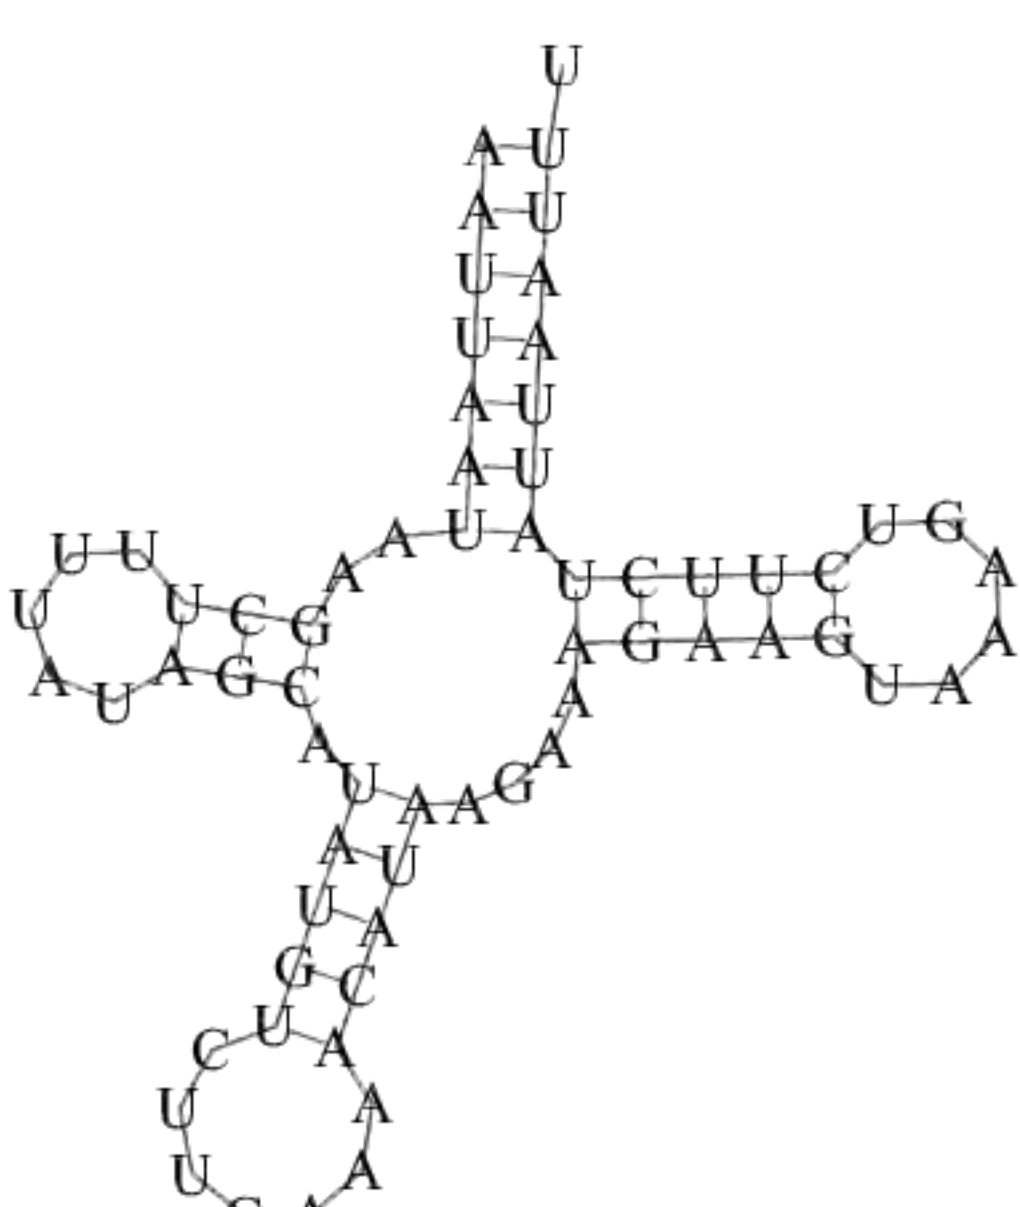

Threonine(ugu)

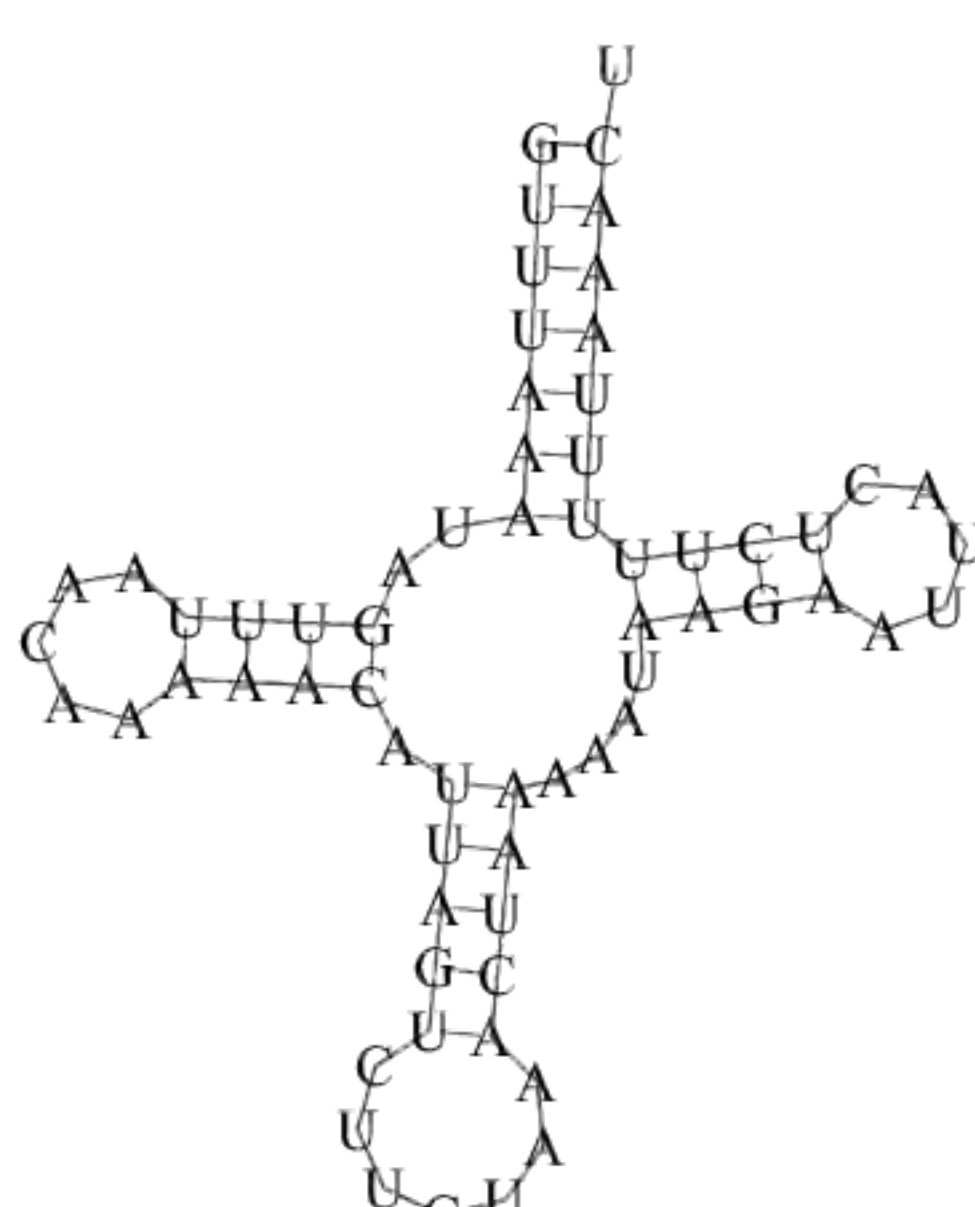

Tryptophan(uca)

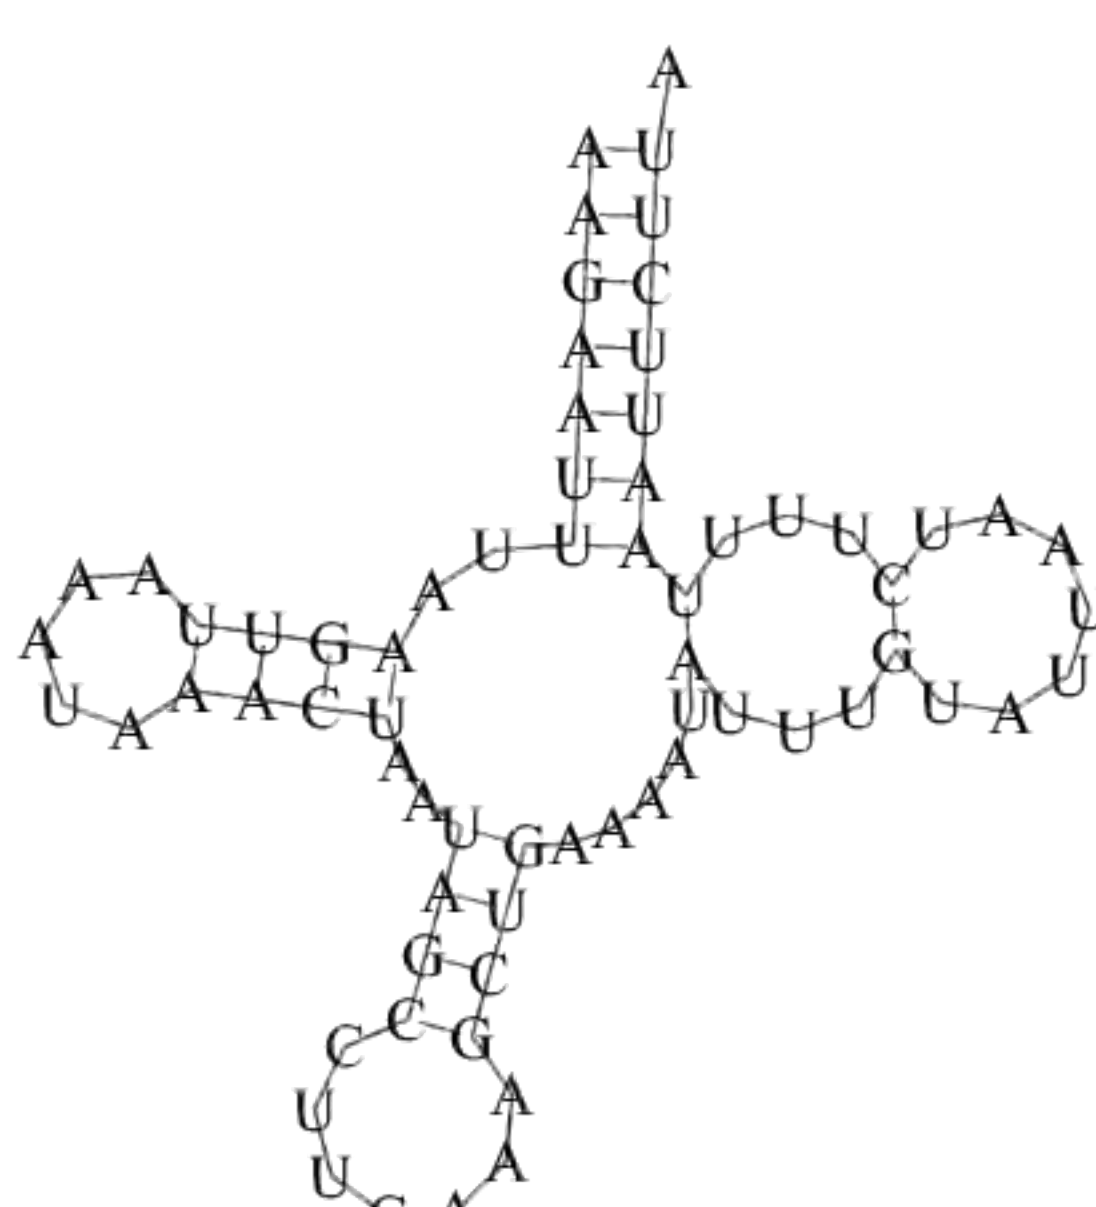

Tyrosine(gua)

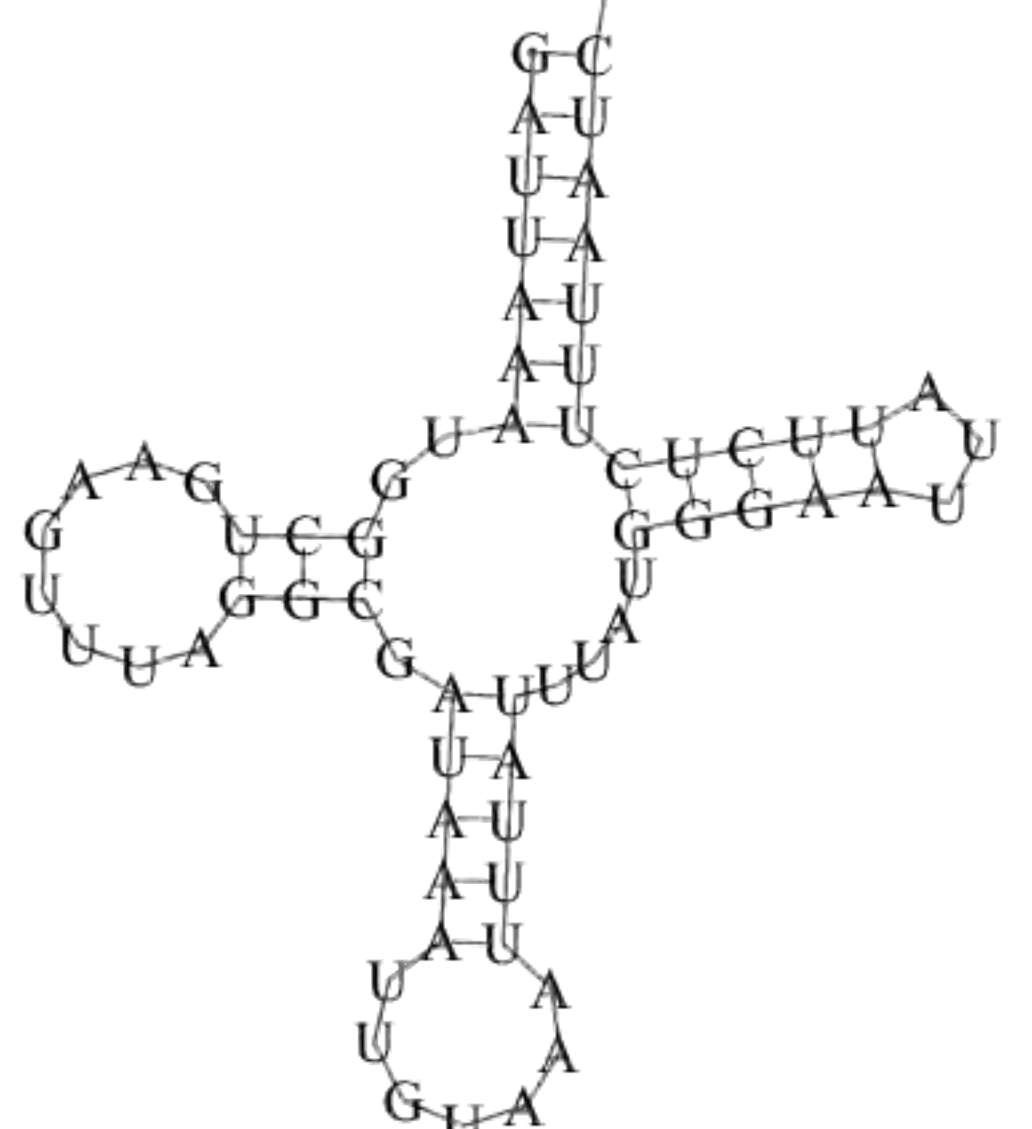

Valine(uac)

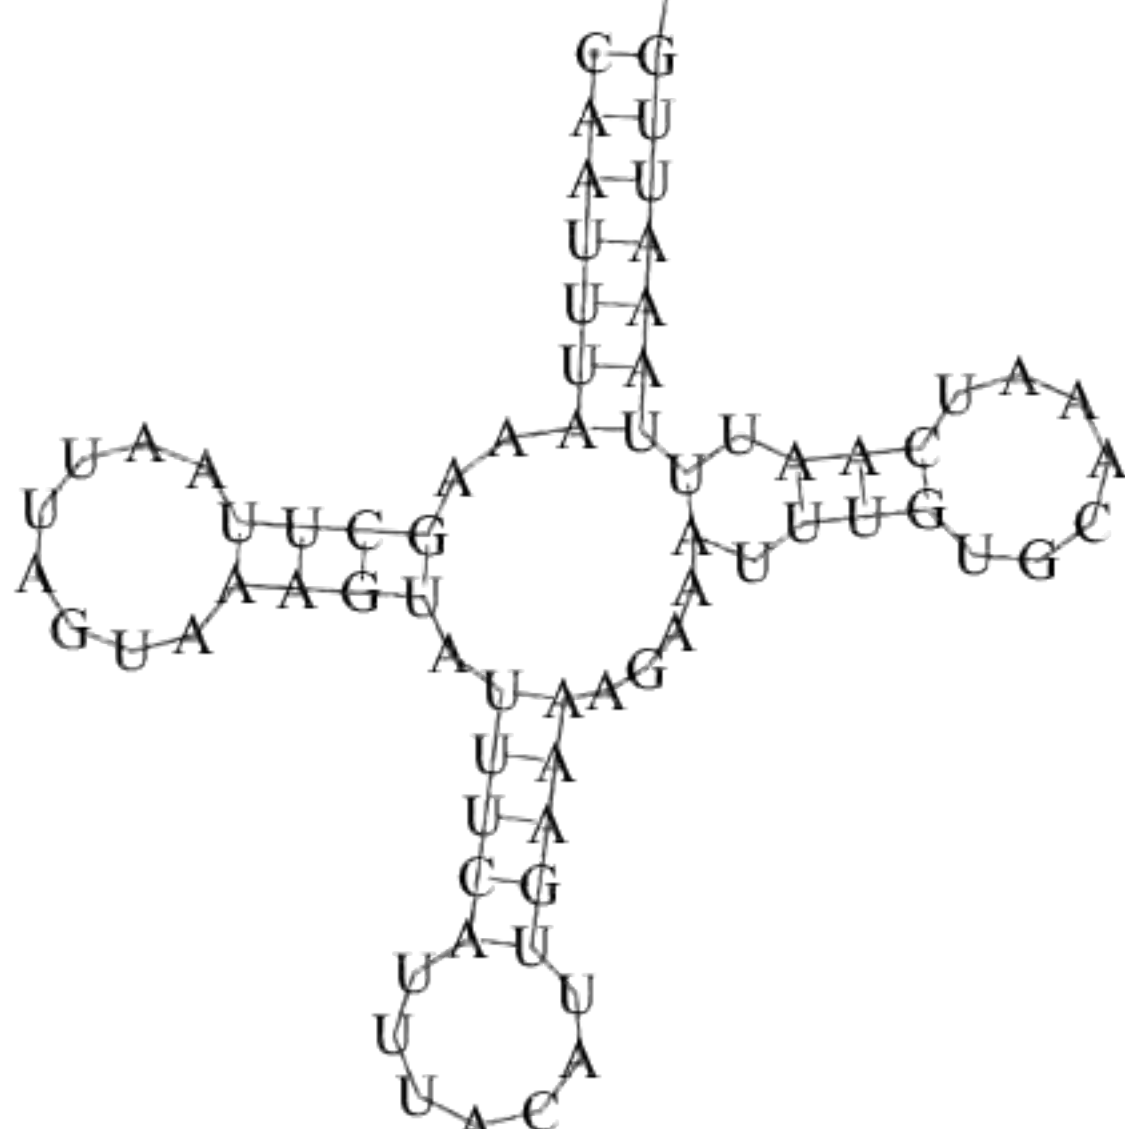

Supplement: s1 [file s1]
