# Supplementary material for: Phylogenetic Analysis of Some Species of the Anopheles hyrcanus Group (Diptera: Culicidae) in China Based on Complete Mitochondrial Genomes
Source: MDPI journal article supplement (doi:10.3390/genes14071453), 2023-07-16
Supplement: s1 [file s1]

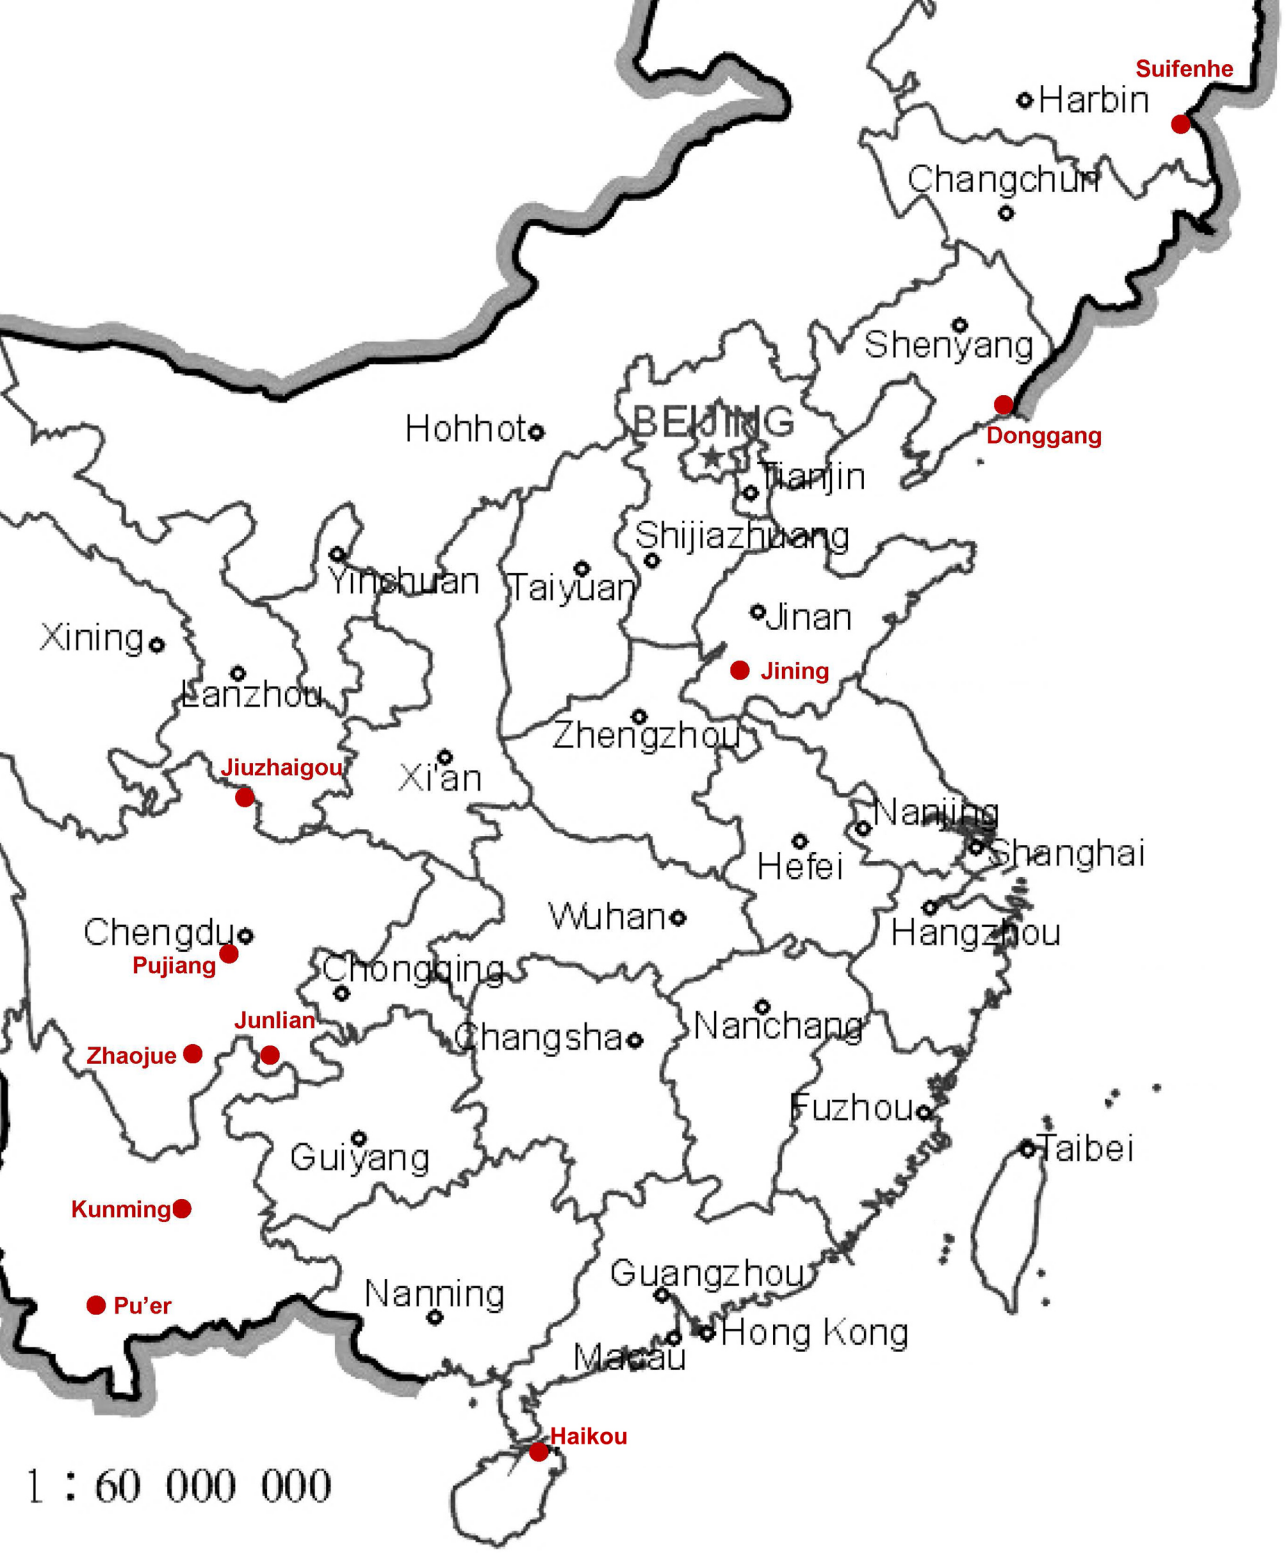

Suifenhe

Harbin

Changchun

Shenyang

Donggang

BEIJING

Hohhot

Tianjin

Shijiazhuang

Taiyuan

Jinan

Jining

Zhengzhou

Xi'an

Jiuzhaigou

Lanzhou

Xining

Nanjing

Hefei

Shanghai

Hangzhou

Wuhan

Chongqing

Chengdu

Pujiang

Junlian

Zhaojue

Changsha

Nanchang

Fuzhou

Taipei

Guiyang

Kunming

Pu'er

Nanning

Guangzhou

Hong Kong

Macao

Haikou

1 : 60 000 000
