# Supplementary material for: Phylogenetic Analysis of Some Species of the Anopheles hyrcanus Group (Diptera: Culicidae) in China Based on Complete Mitochondrial Genomes
Source: MDPI journal article supplement (doi:10.3390/genes14071453), 2023-07-16
Supplement: s1 [file s1]

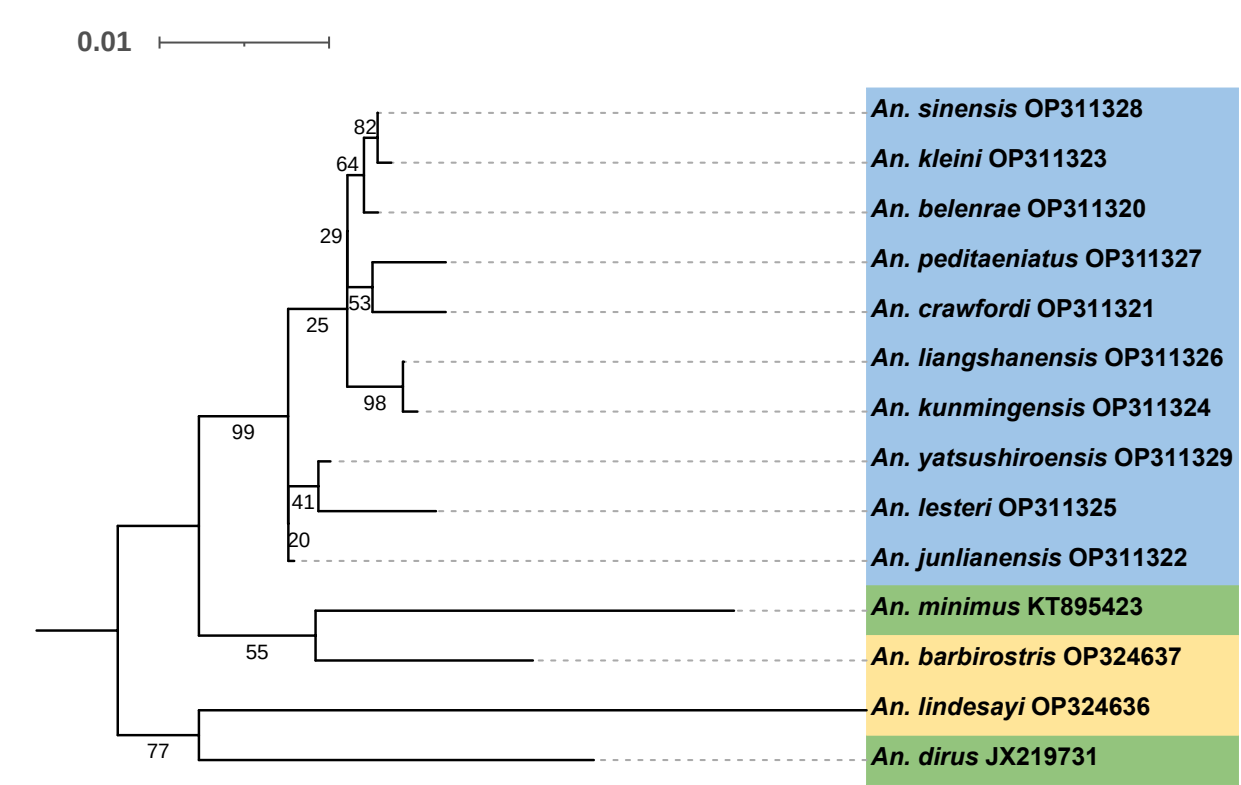

a

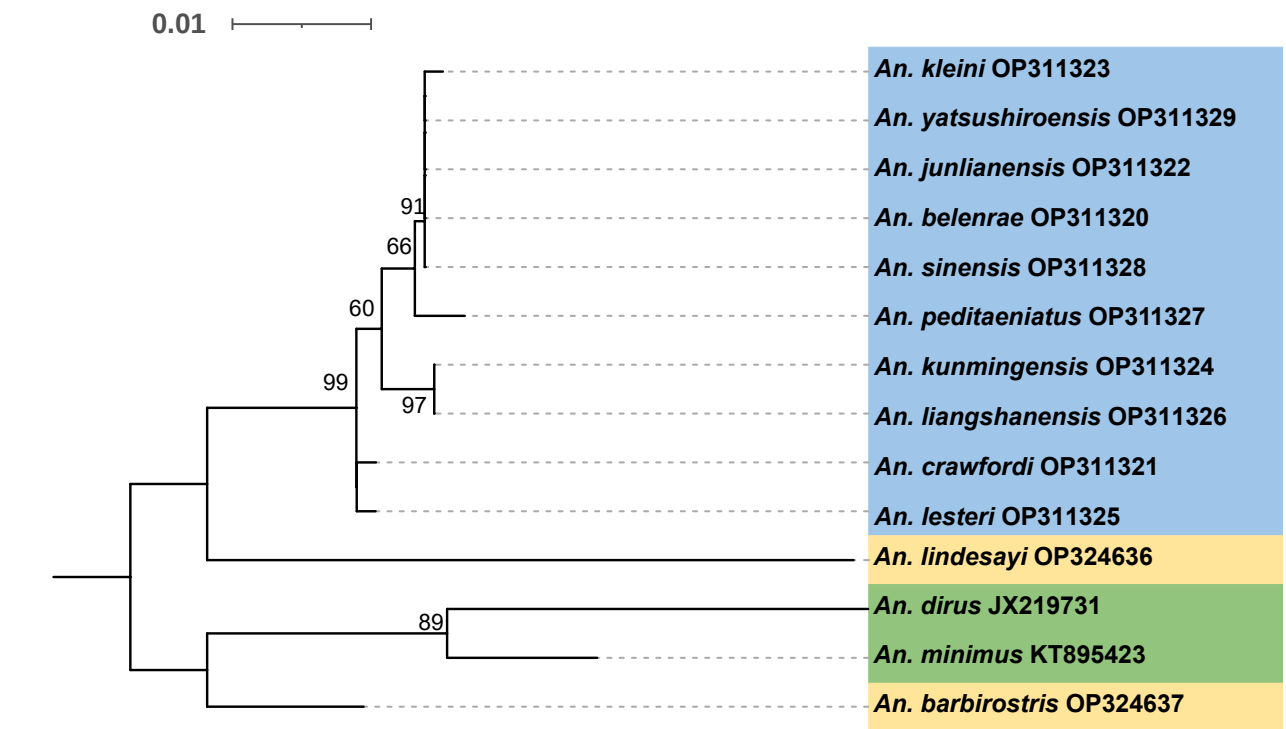

b

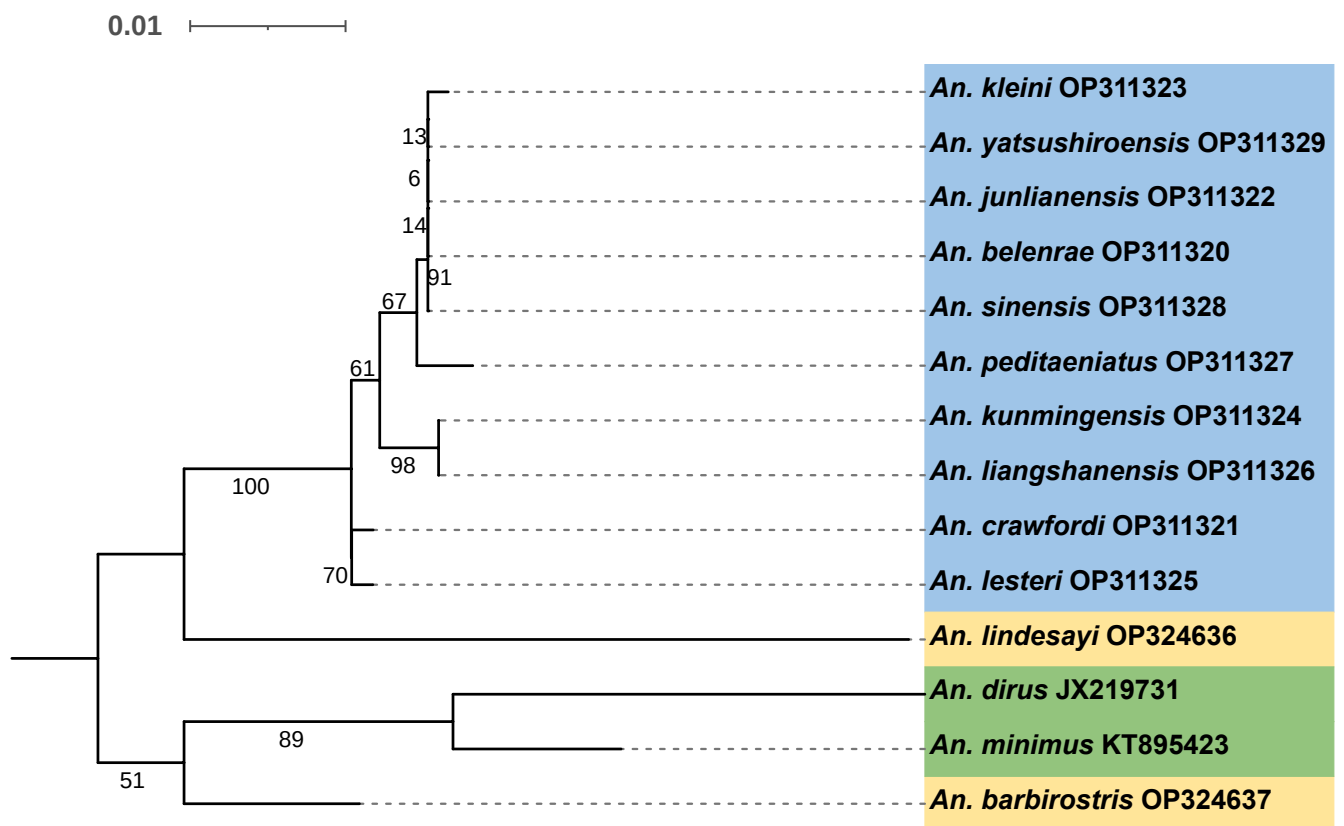

c

Fig. S6 Phylogenetic reconstruction by maximum likelihood based on tRNA and rRNA coding region concatenated of the species sequenced in this study and two other taxa with data available from GenBank. a tRNAs. b 12S rRNA c 16S rRNA. The values of bootstrapping support are shown to the left of the branch point.
