# Supplementary material for: Phylogenetic Analysis of Some Species of the Anopheles hyrcanus Group (Diptera: Culicidae) in China Based on Complete Mitochondrial Genomes
Source: MDPI journal article supplement (doi:10.3390/genes14071453), 2023-07-16
Supplement: s1 [file s1]

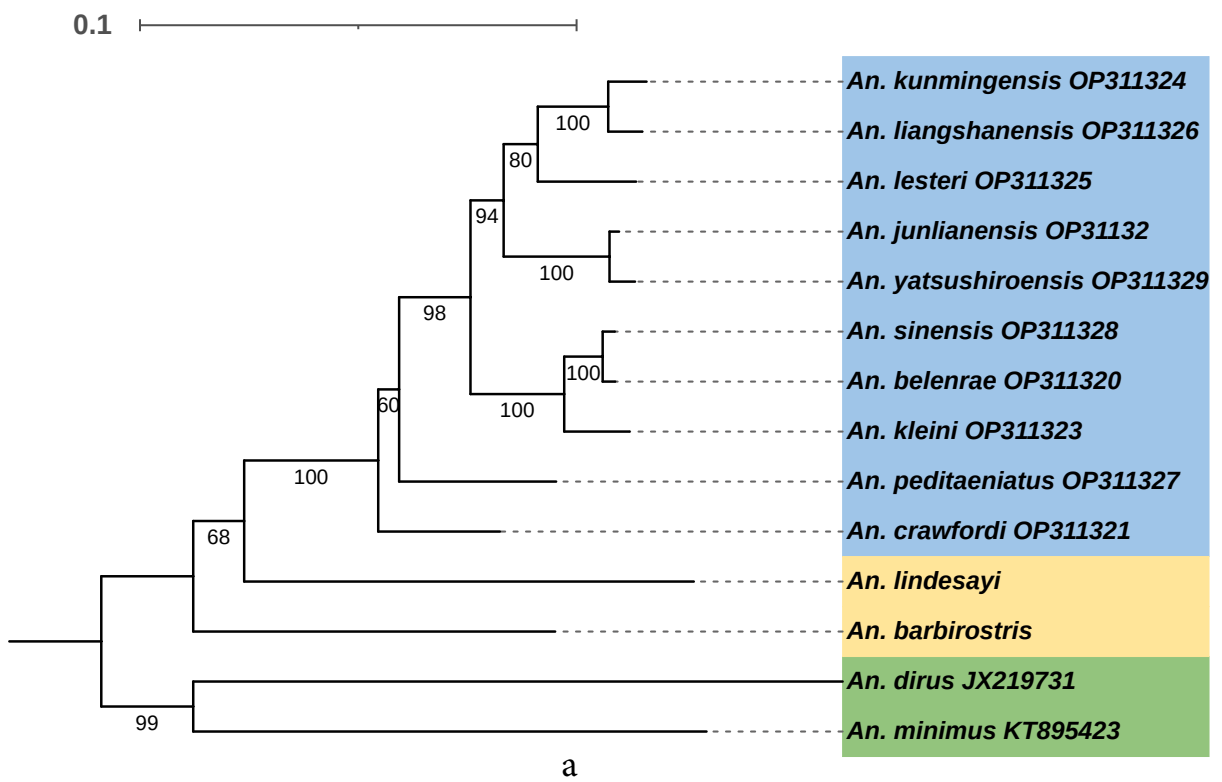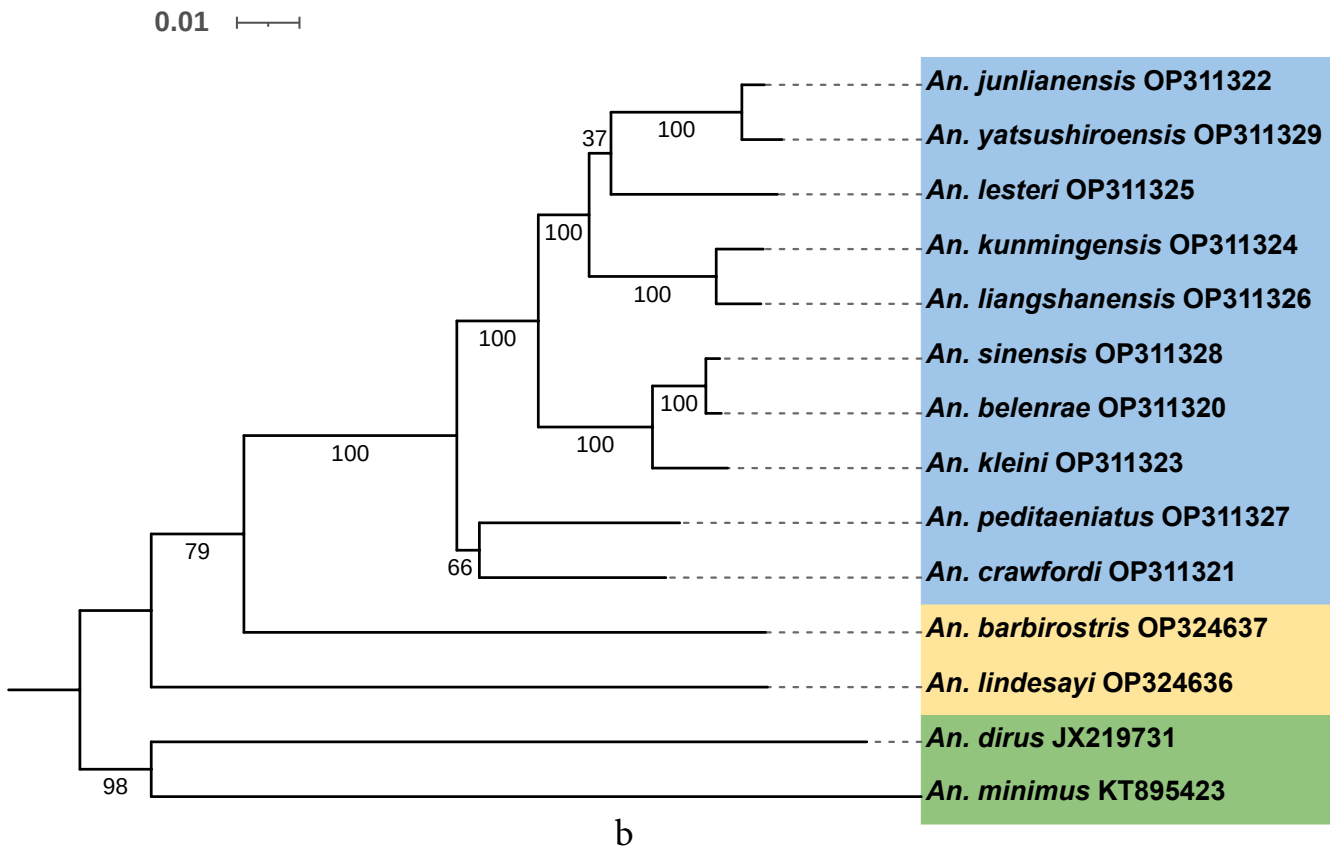

Fig. S5 Phylogenetic reconstruction by maximum likelihood based on combined protein-coding subunits concatenated of the species sequenced in this study and two other taxa with data available from GenBank. a The combination of ND2 and ND4 subunits. b The combination of COI, ND2, ND4 and ND5 subunits. The values of bootstrapping support are shown to the left of the branch point.
