# Supplementary material for: Phylogenetic Analysis of Some Species of the Anopheles hyrcanus Group (Diptera: Culicidae) in China Based on Complete Mitochondrial Genomes
Source: MDPI journal article supplement (doi:10.3390/genes14071453), 2023-07-16
Supplement: s1 [file s1]

*An. benzeri* C A C T T A A T T T A T A A A A G T T A T A T A C T T T C A T A T T T T T T T T  
*An. cawleyi* T A T T G T A A T T T A T A A A T T T C A T A C T T T T C A T A T T T T A G T T T T  
*An. junlandensis* T A T T C G T G T G T A T T A A A T T T T T T T T T T T T T T T T T T T T T T T C A T  
*An. kleini* A T T T A A T T T T T T G A A G T T T T A T A T A C T T T T T T T T T T T T T T T T  
*An. kunmingensis* T A T T C T A T T T C A A C A A C T G T T T A T A T A C T T T T T T T T T T T T T T T T  
*An. lestari* C A T T C T A T T T C A A C A A A T A C C T T G T T T T T T T T T T T T T T T T T T A C  
*An. liangshanensis* T A T T C T A T T T C A A C A A C T G T T T T T T T T T T T T T T T T T T T T T T T T  
*An. pedicentariatus* T T T T A C A A T T T A T A A C T G T T T T T A T A T T T A T C A T T T C C A T T T T T  
*An. sinensis* T A C T T A A T T T T A T A G A A G T T T A T A T A C T T T C A T A T T T T T T T T T T  
*An. yatsushiroensis* T A T T T A A T C T T A T A A A T G T T T A T T A A T T T T T T G A A T C T T T T A T
