# Supplementary material for: Phylogenetic Analysis of Some Species of the Anopheles hyrcanus Group (Diptera: Culicidae) in China Based on Complete Mitochondrial Genomes
Source: MDPI journal article supplement (doi:10.3390/genes14071453), 2023-07-16

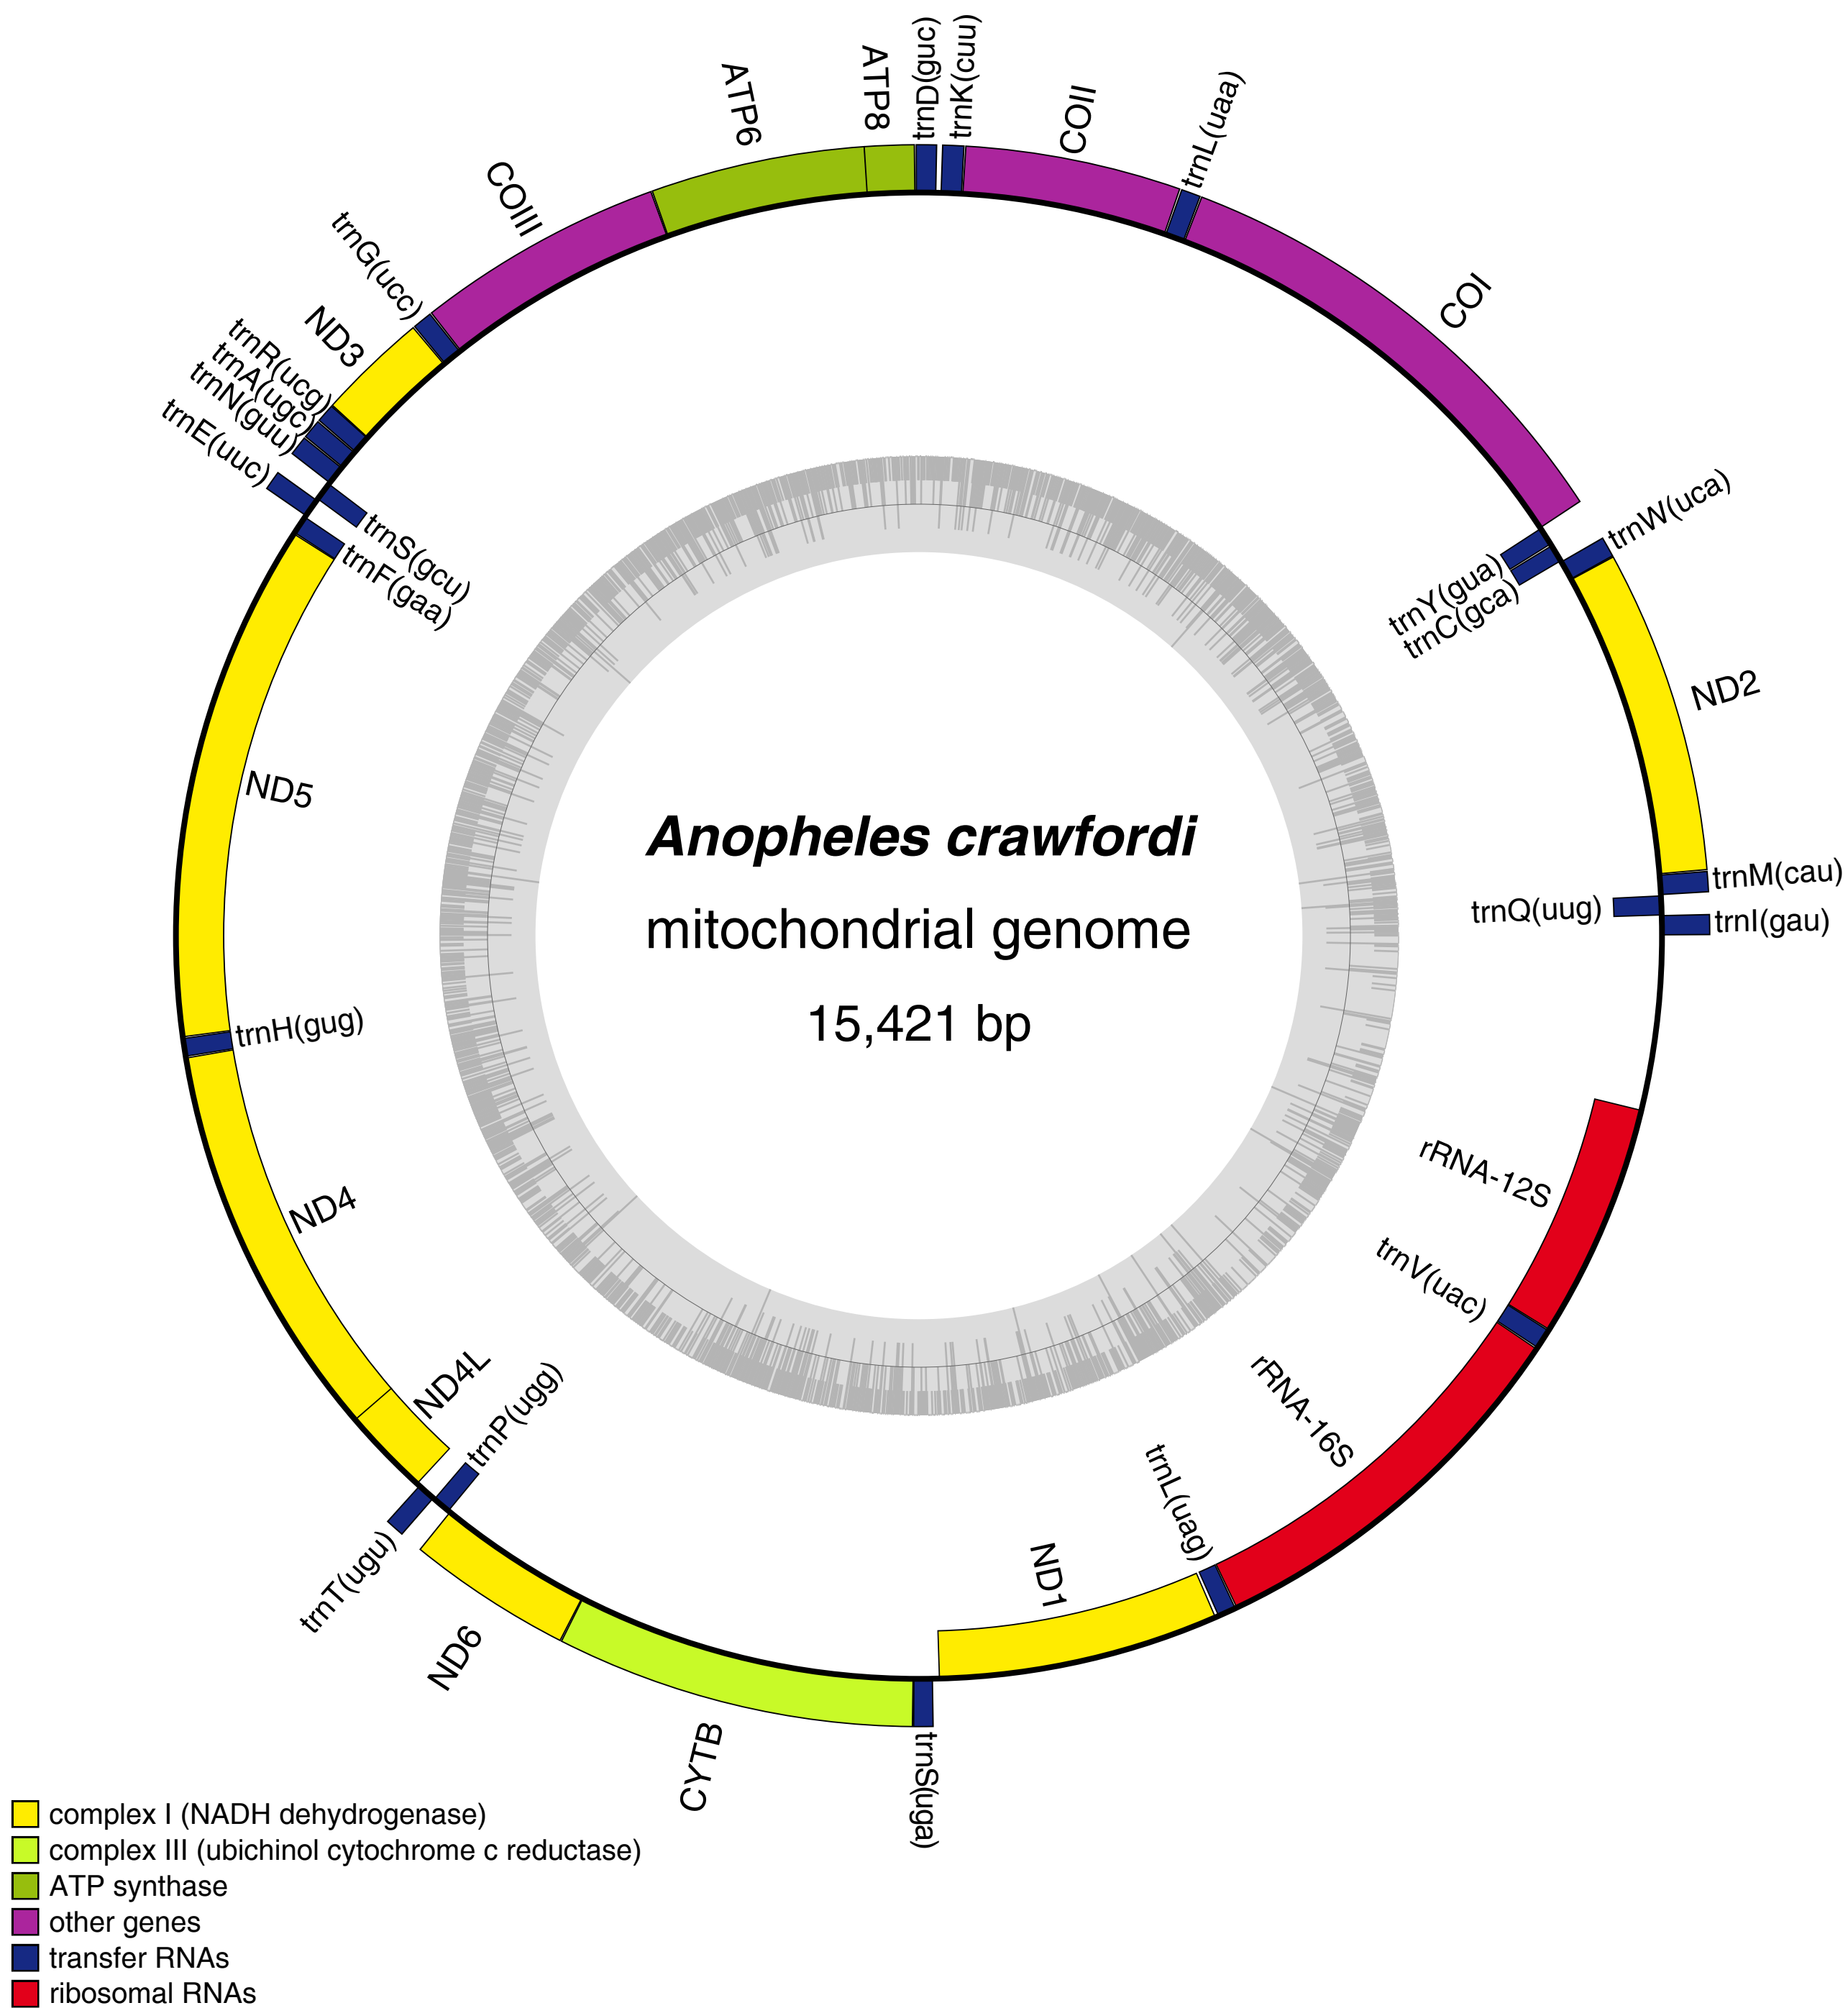

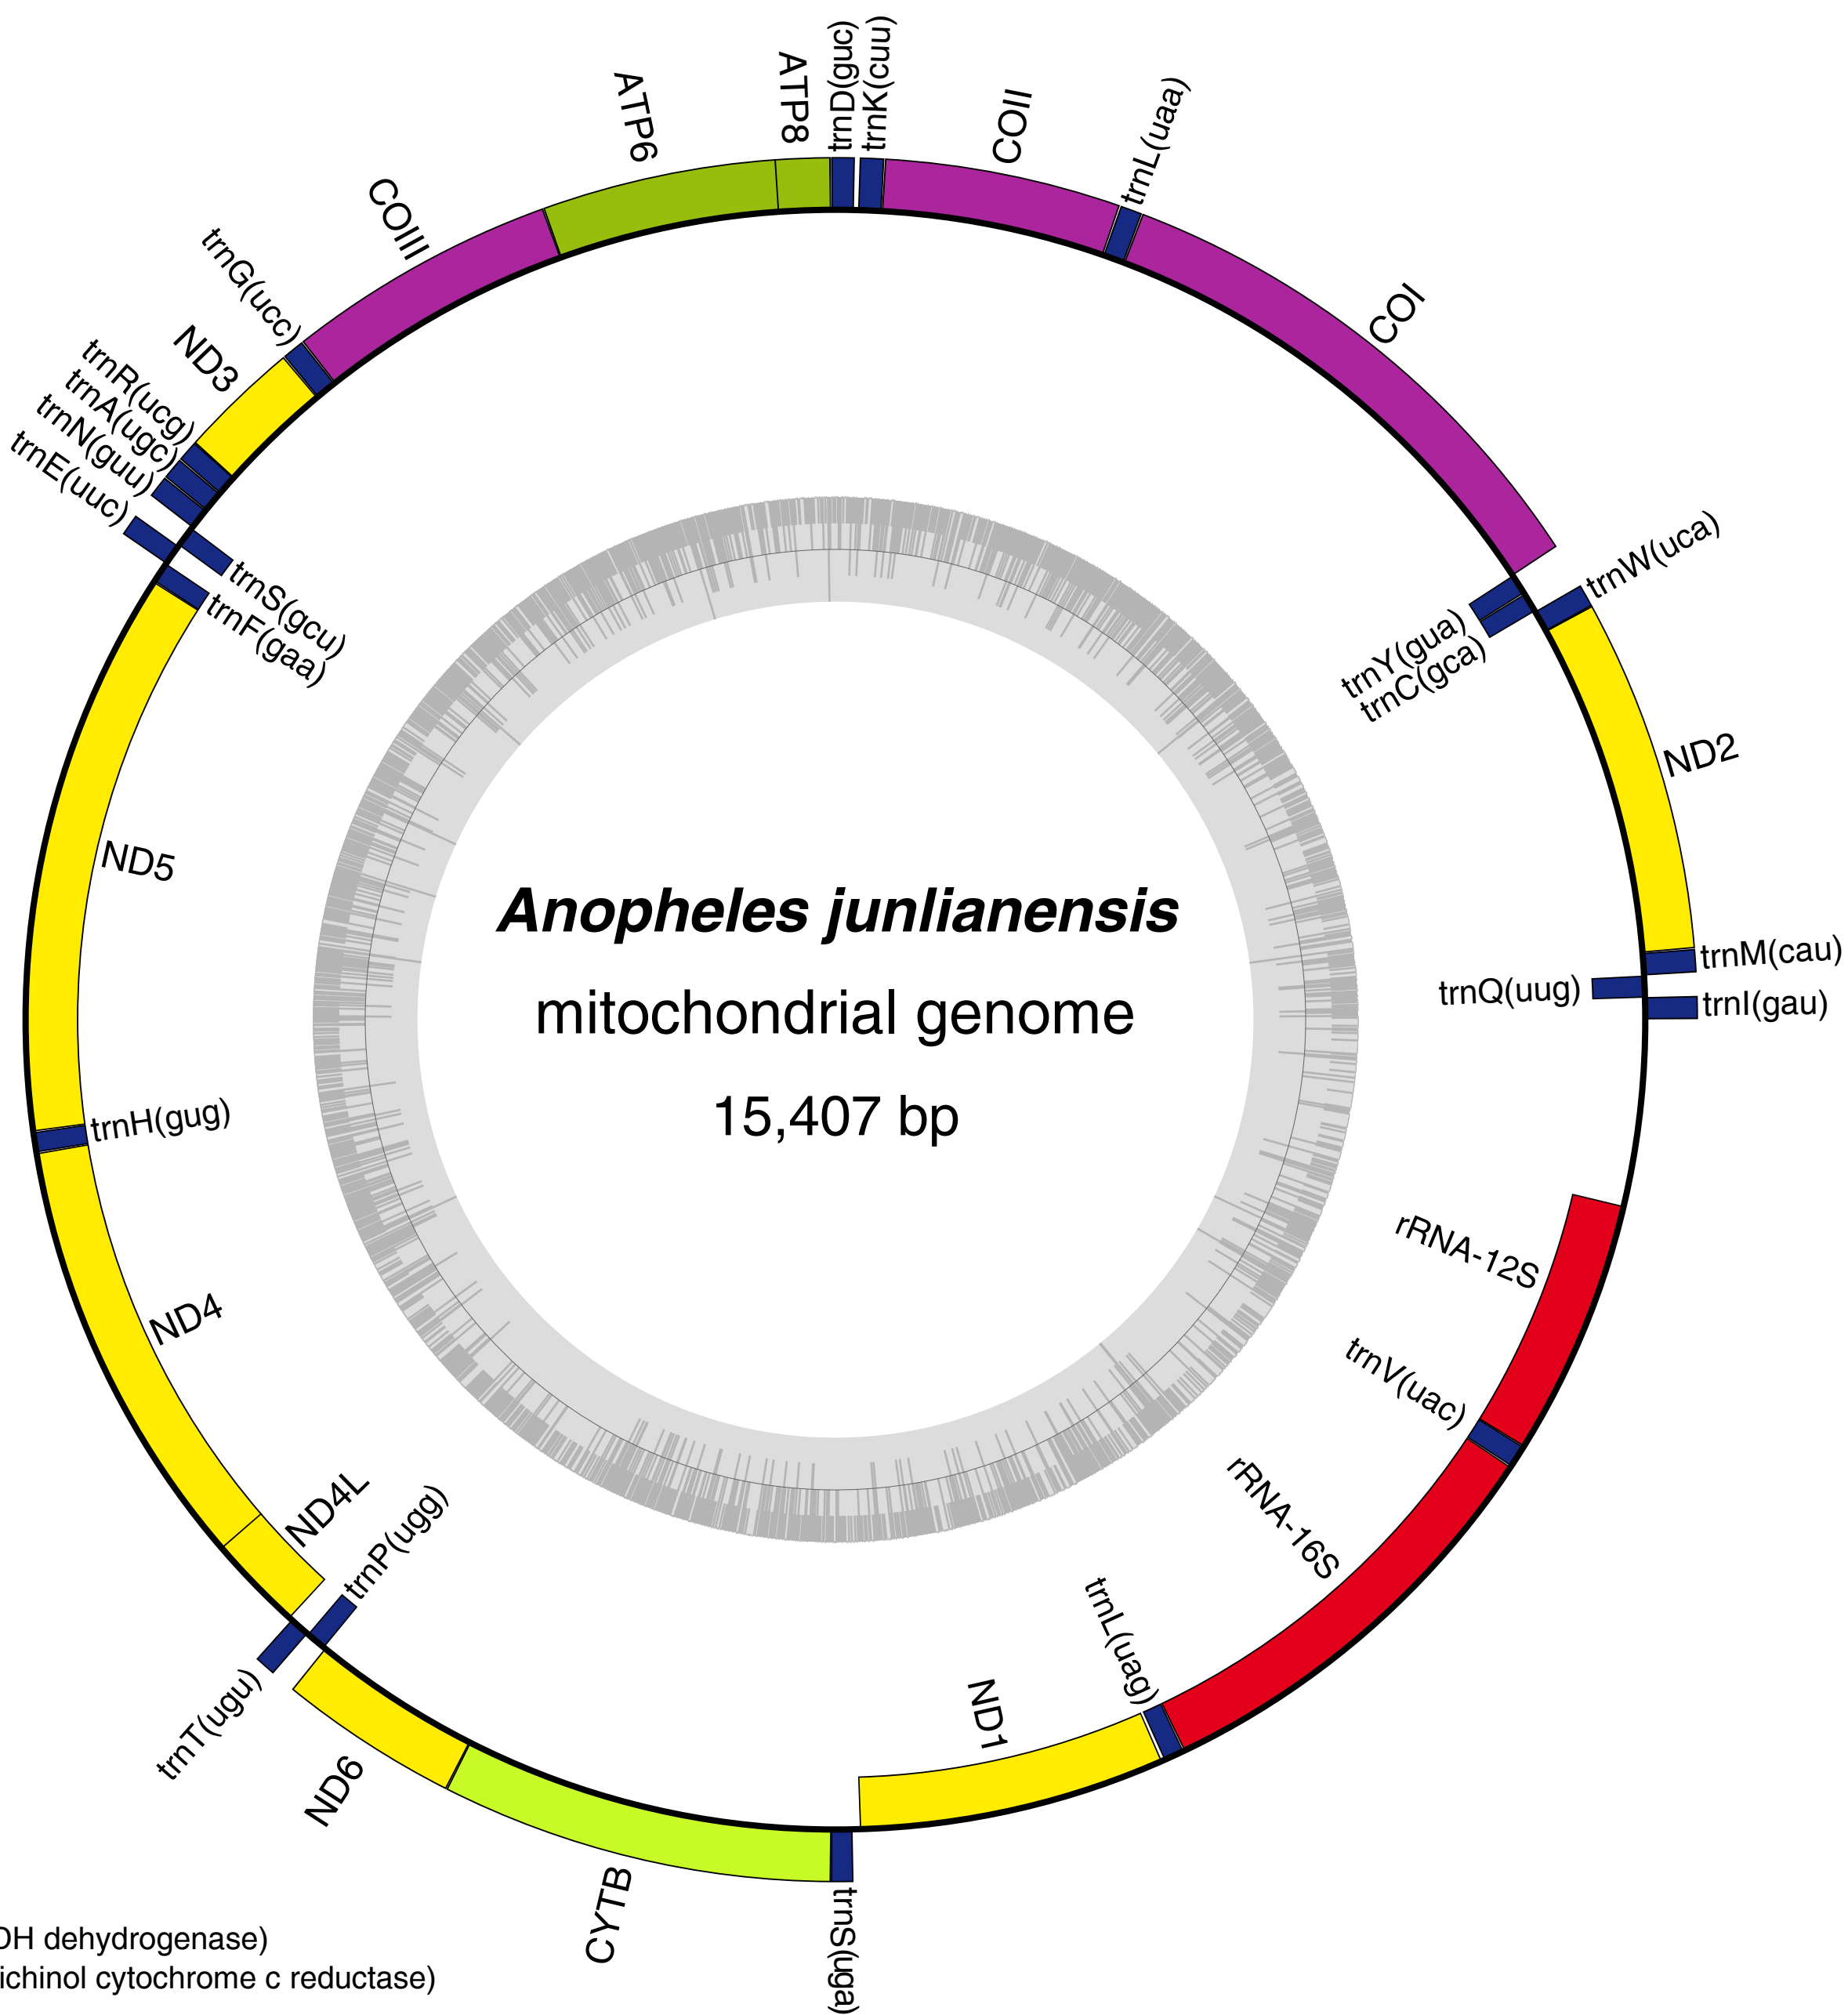

- complex I (NADH dehydrogenase)
- complex III (ubichinol cytochrome c reductase)
- ATP synthase
- other genes
- transfer RNAs
- ribosomal RNAs

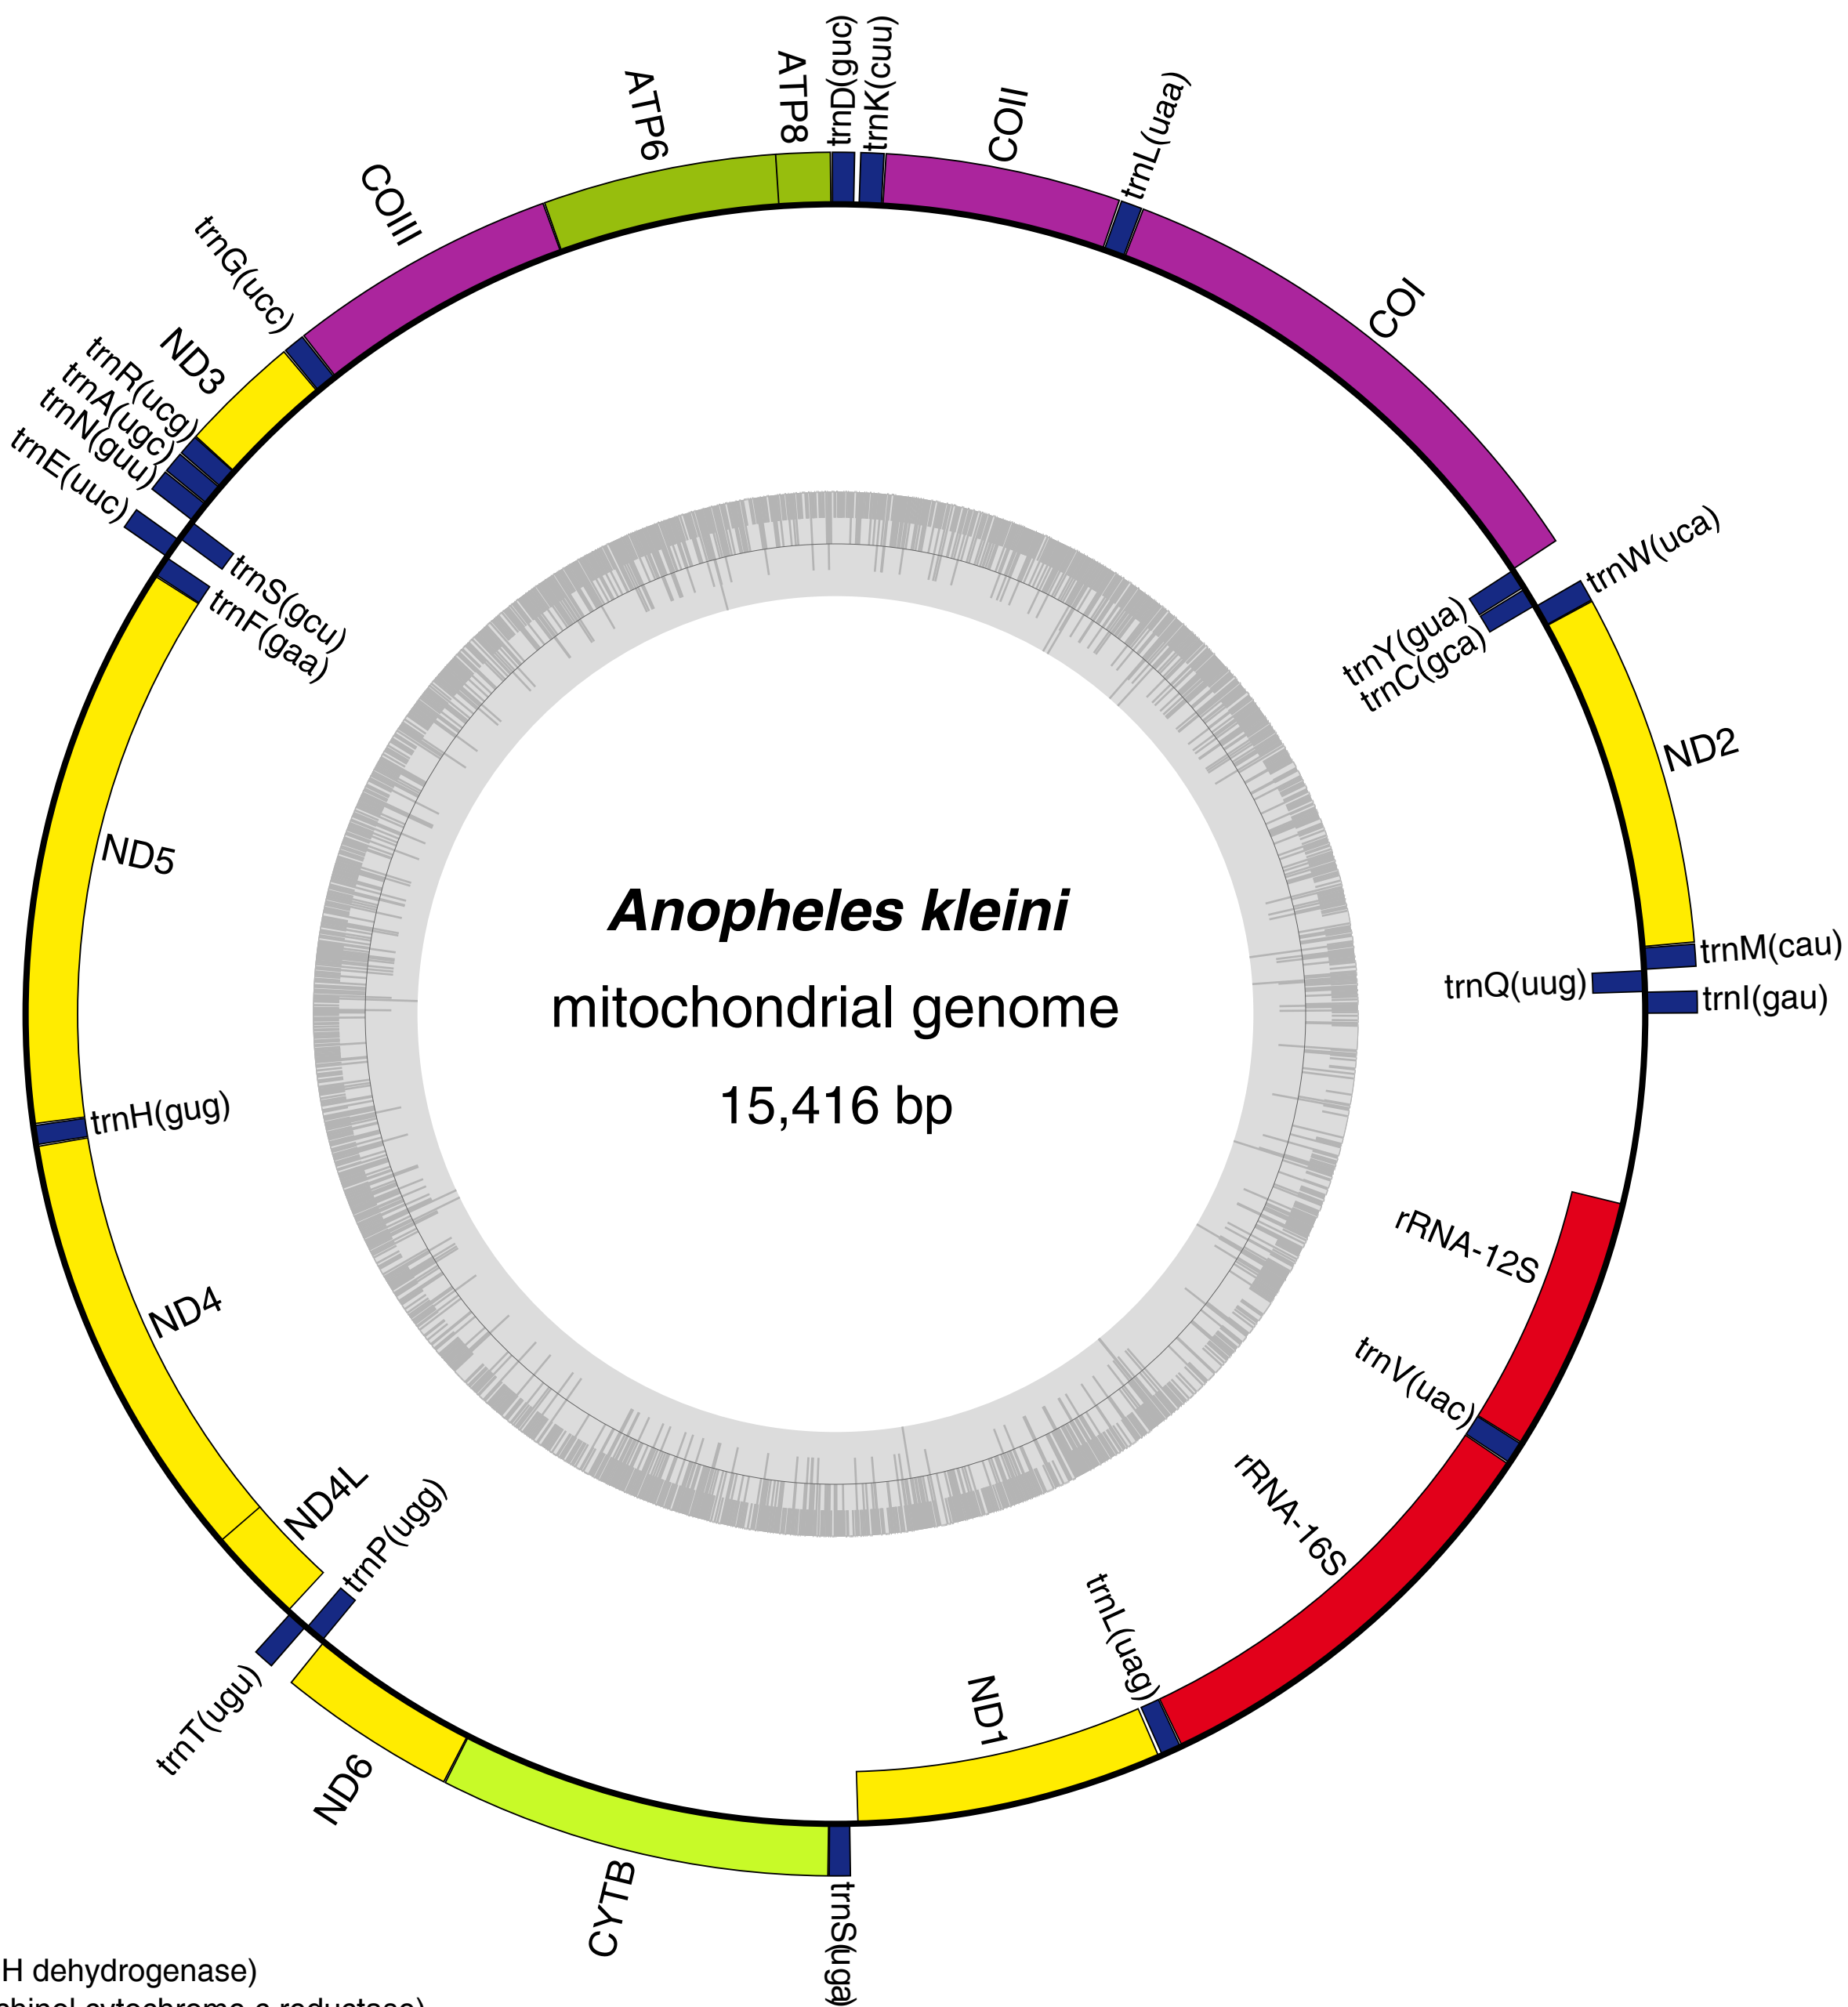

- complex I (NADH dehydrogenase)
- complex III (ubichinol cytochrome c reductase)
- ATP synthase
- other genes
- transfer RNAs
- ribosomal RNAs

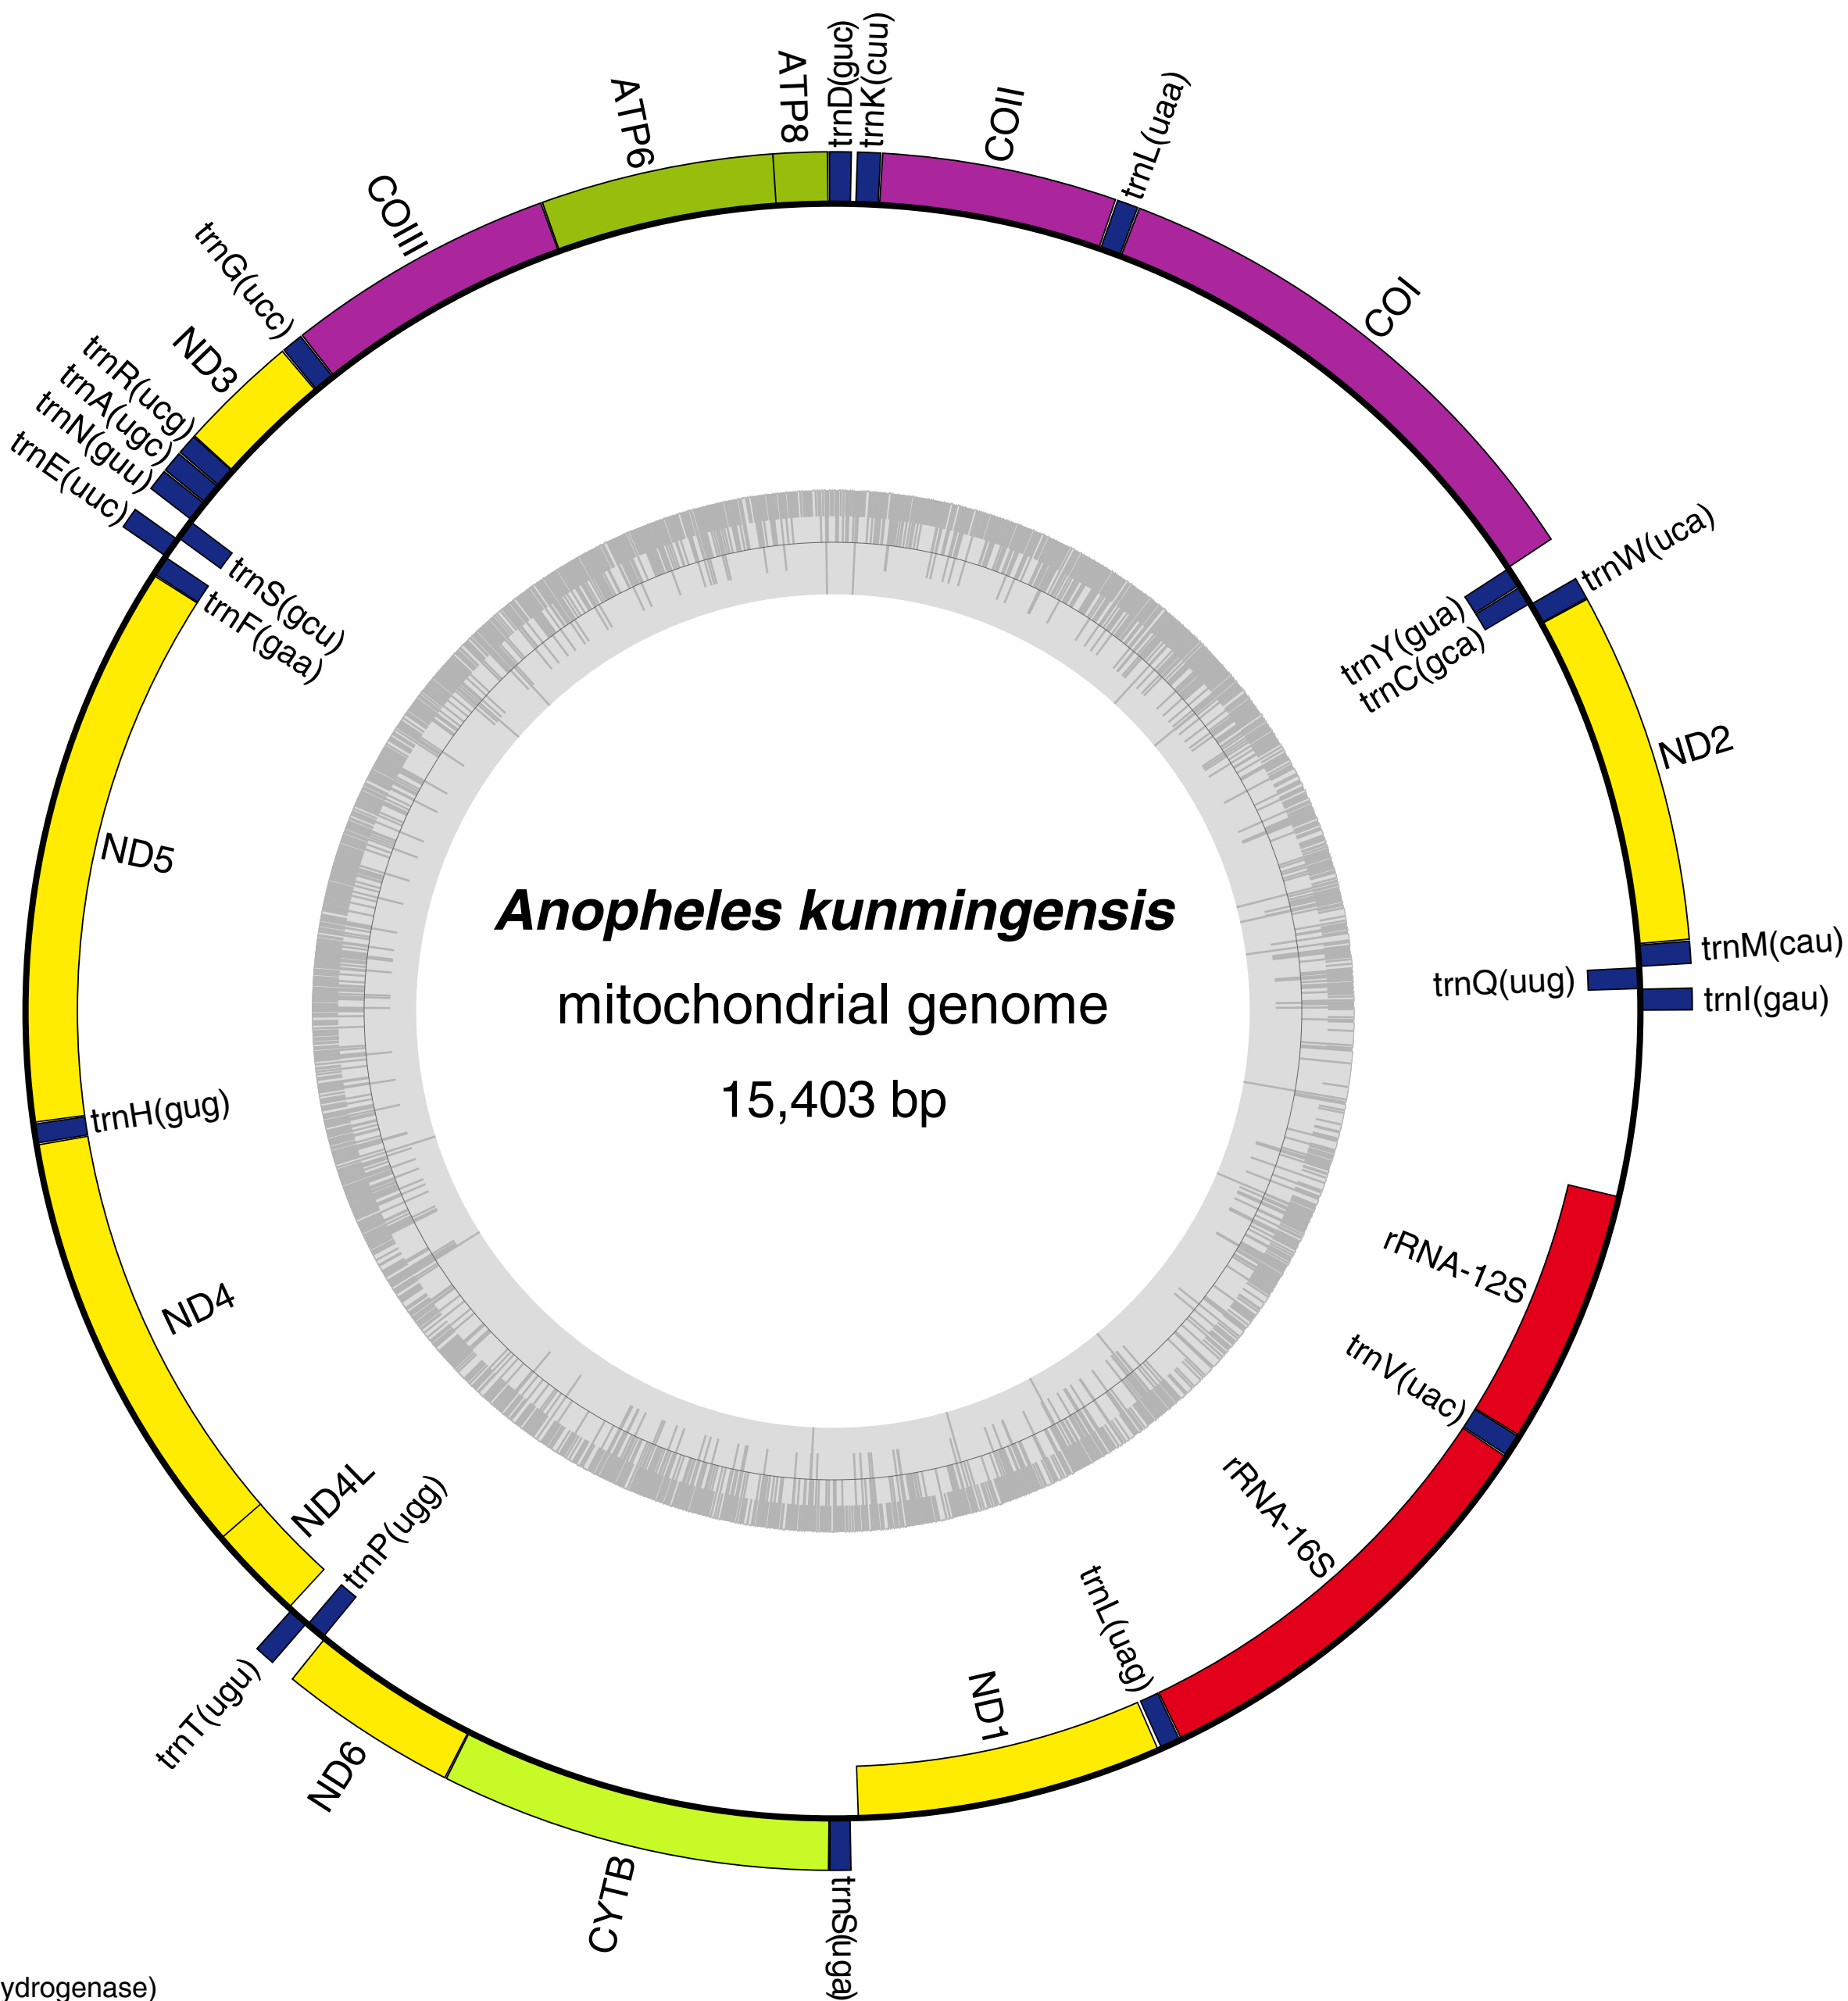

- complex I (NADH dehydrogenase)
- complex III (ubichinol cytochrome c reductase)
- ATP synthase
- other genes
- transfer RNAs
- ribosomal RNAs



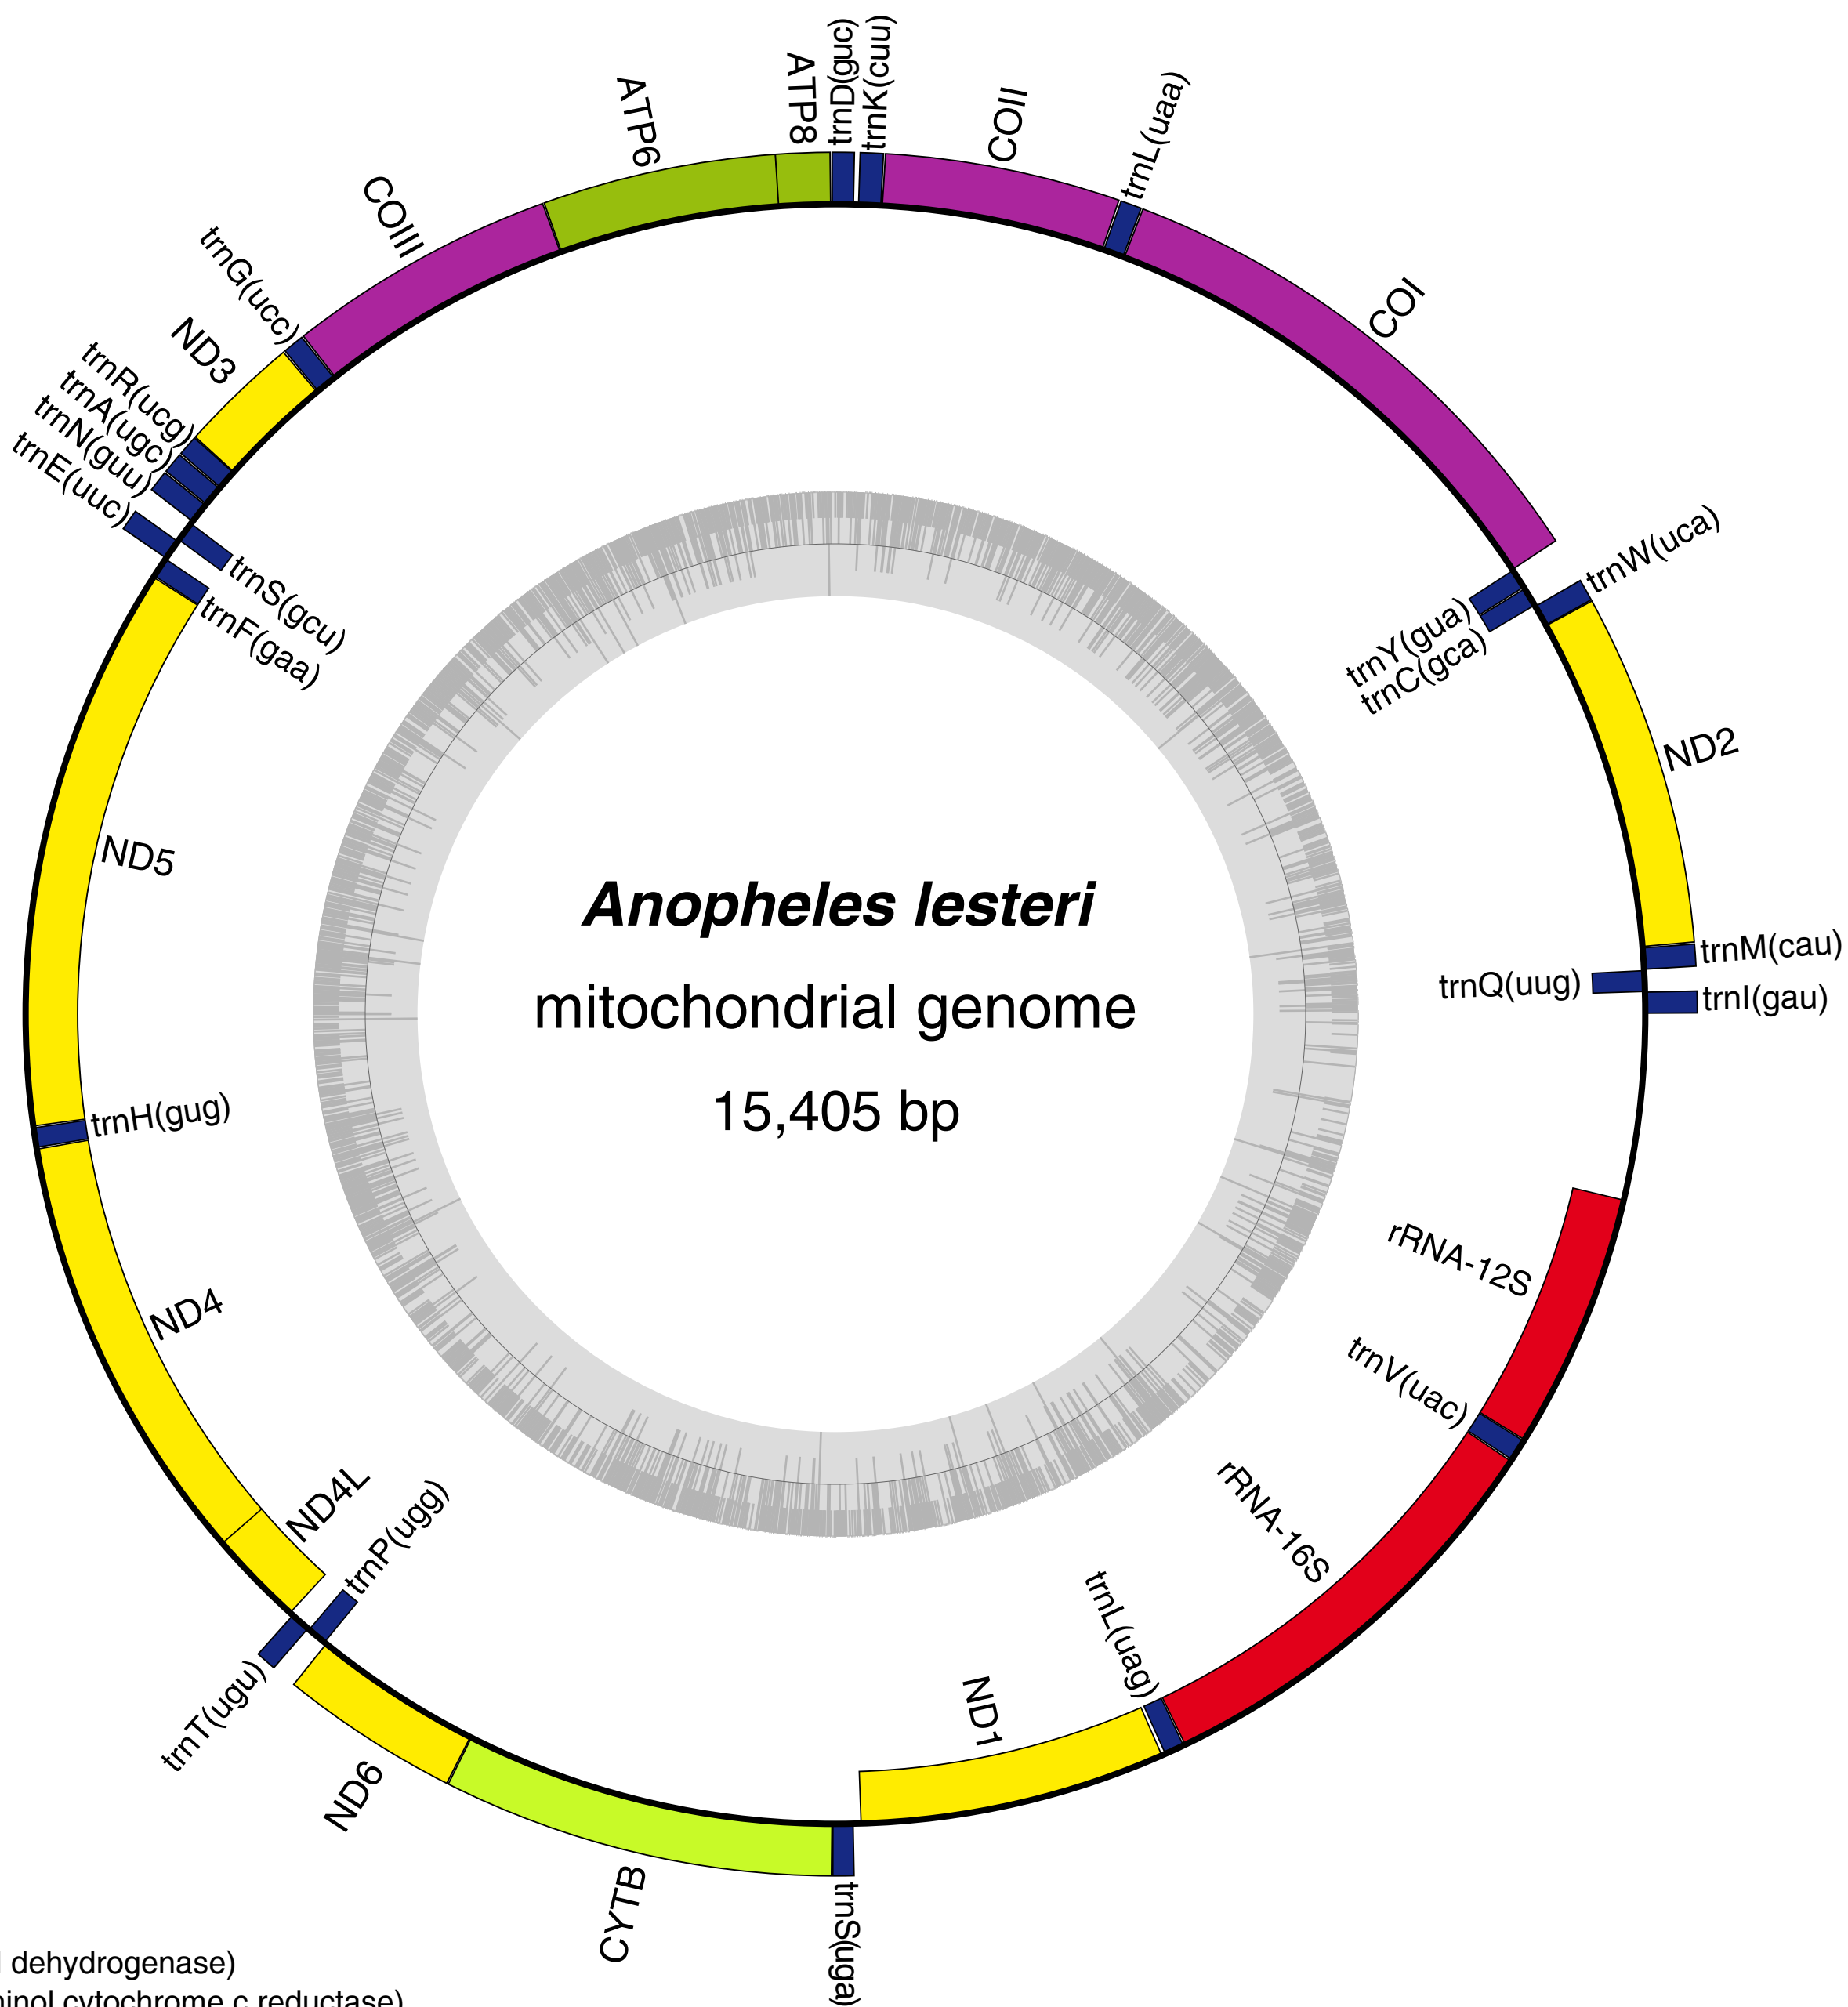

- complex I (NADH dehydrogenase)
- complex III (ubichinol cytochrome c reductase)
- ATP synthase
- other genes
- transfer RNAs
- ribosomal RNAs

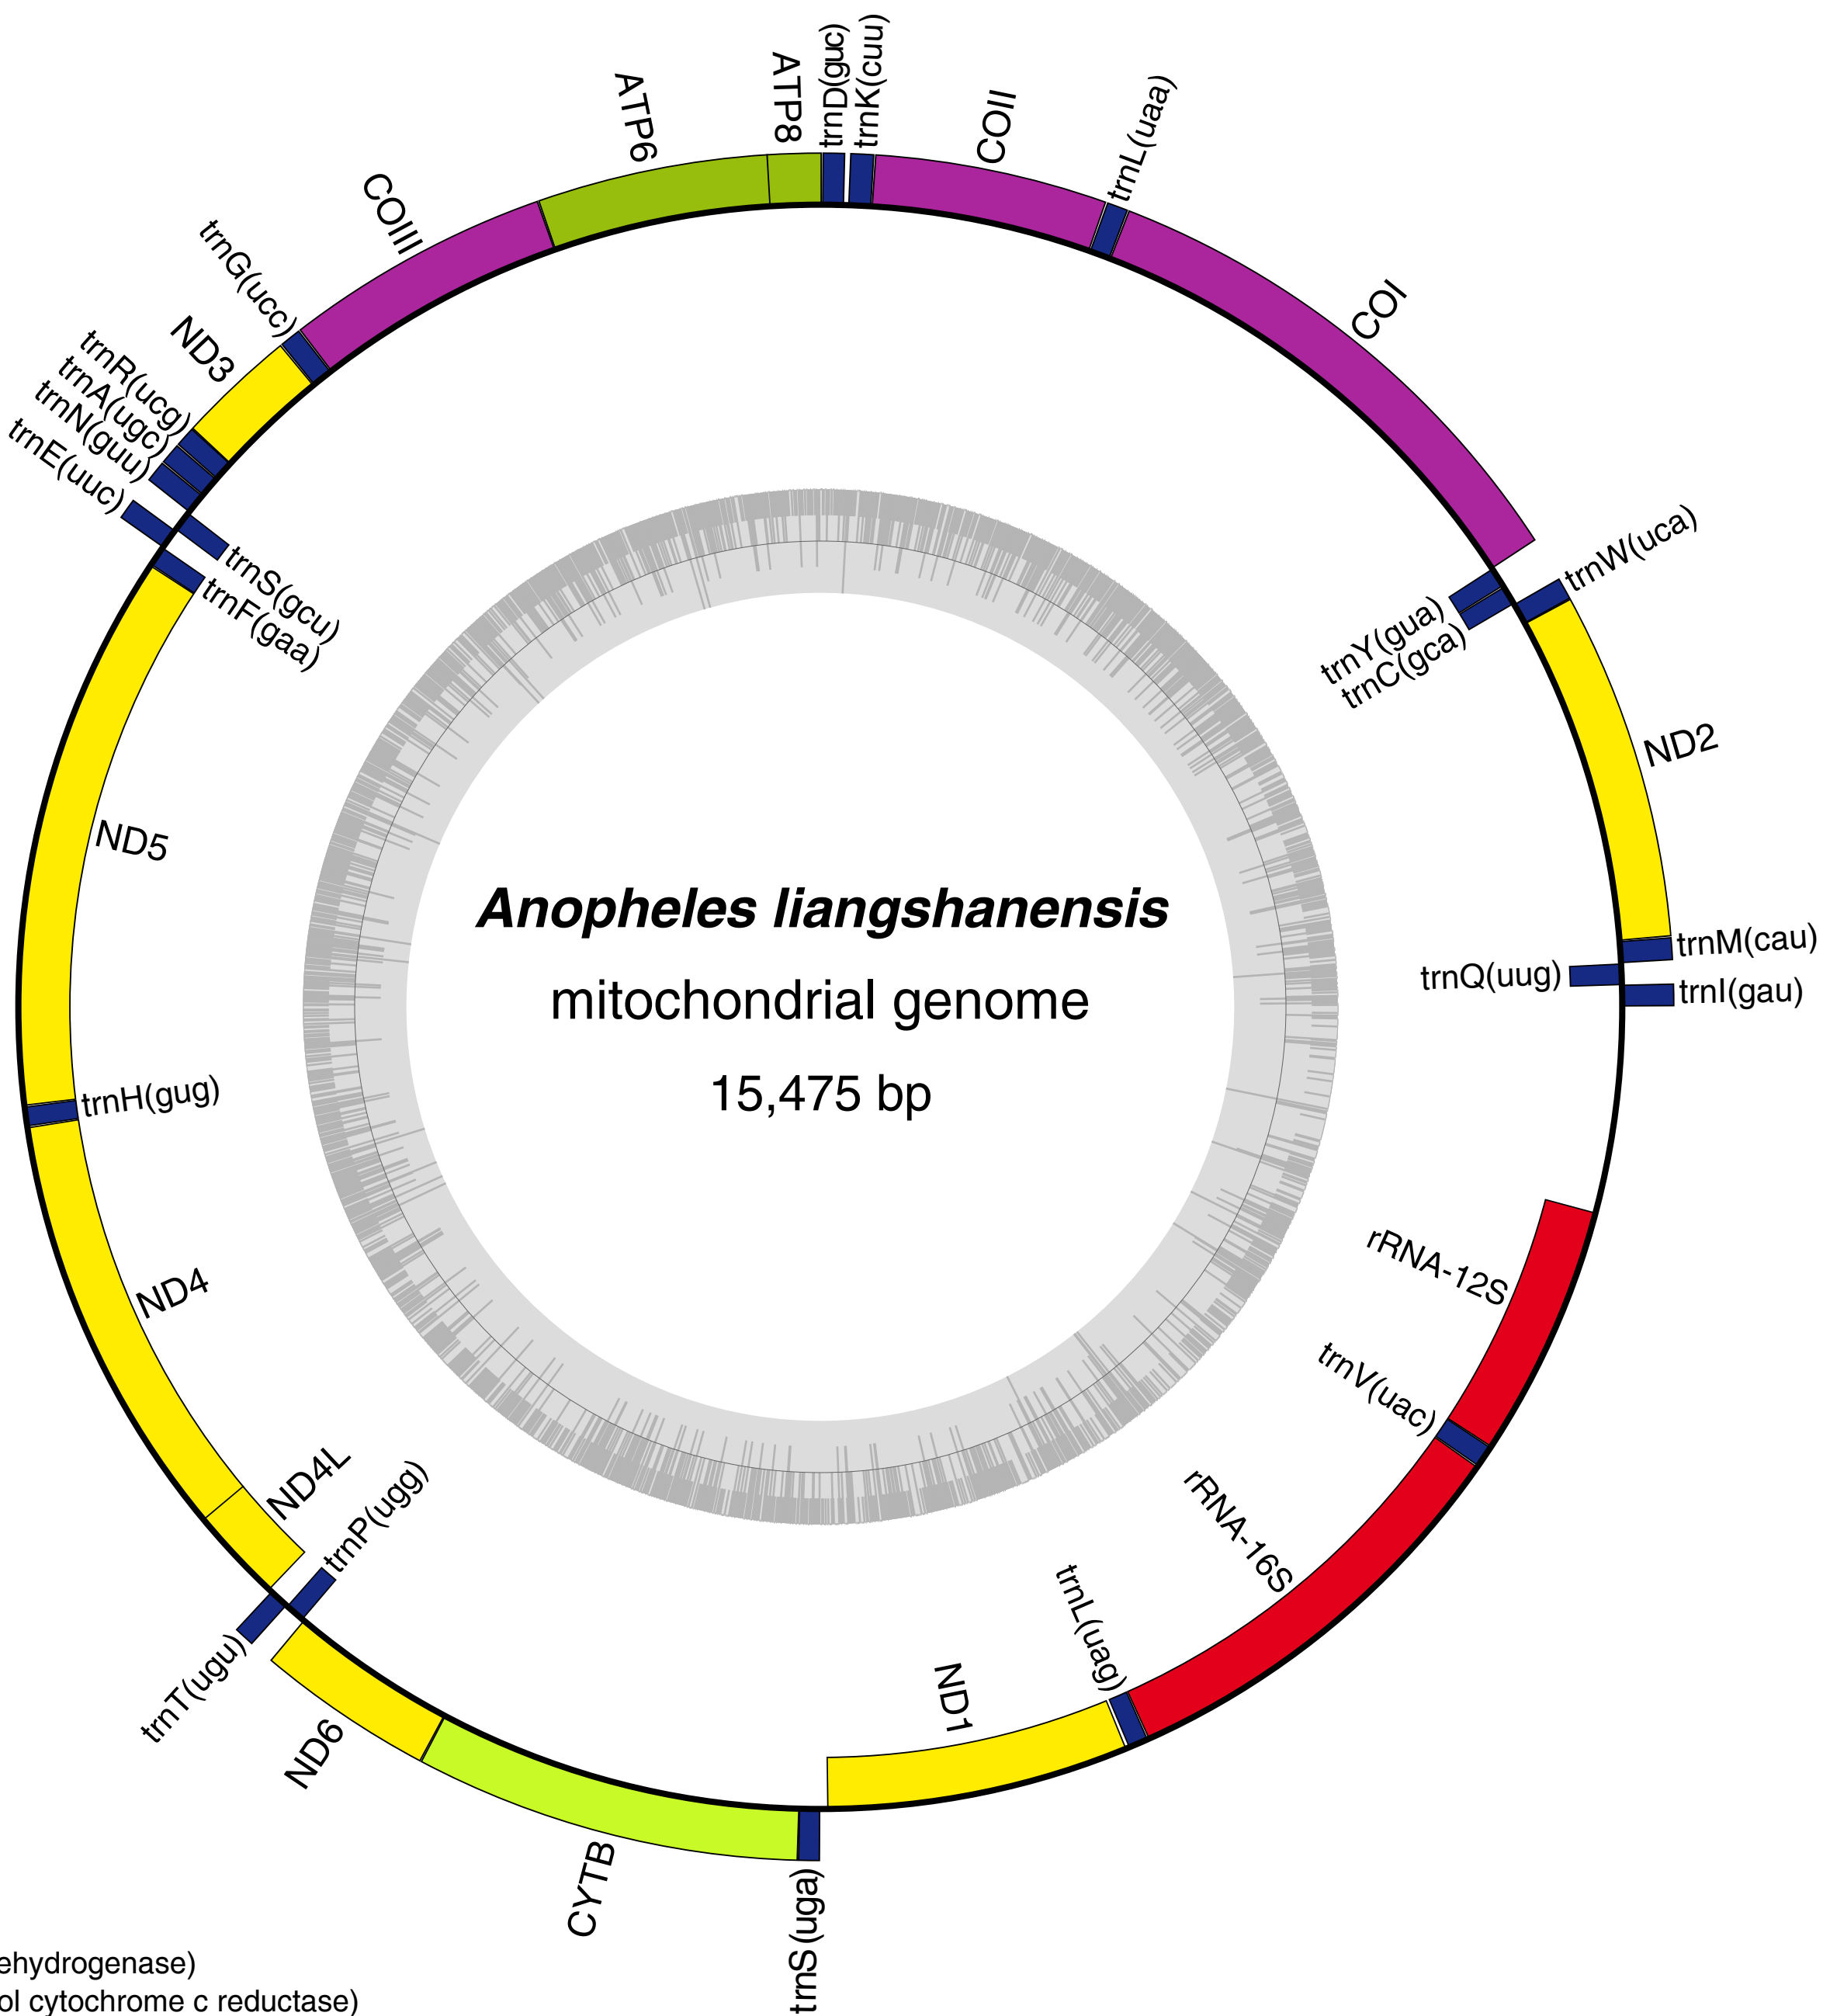

- complex I (NADH dehydrogenase)
- complex III (ubichinol cytochrome c reductase)
- ATP synthase
- other genes
- transfer RNAs
- ribosomal RNAs

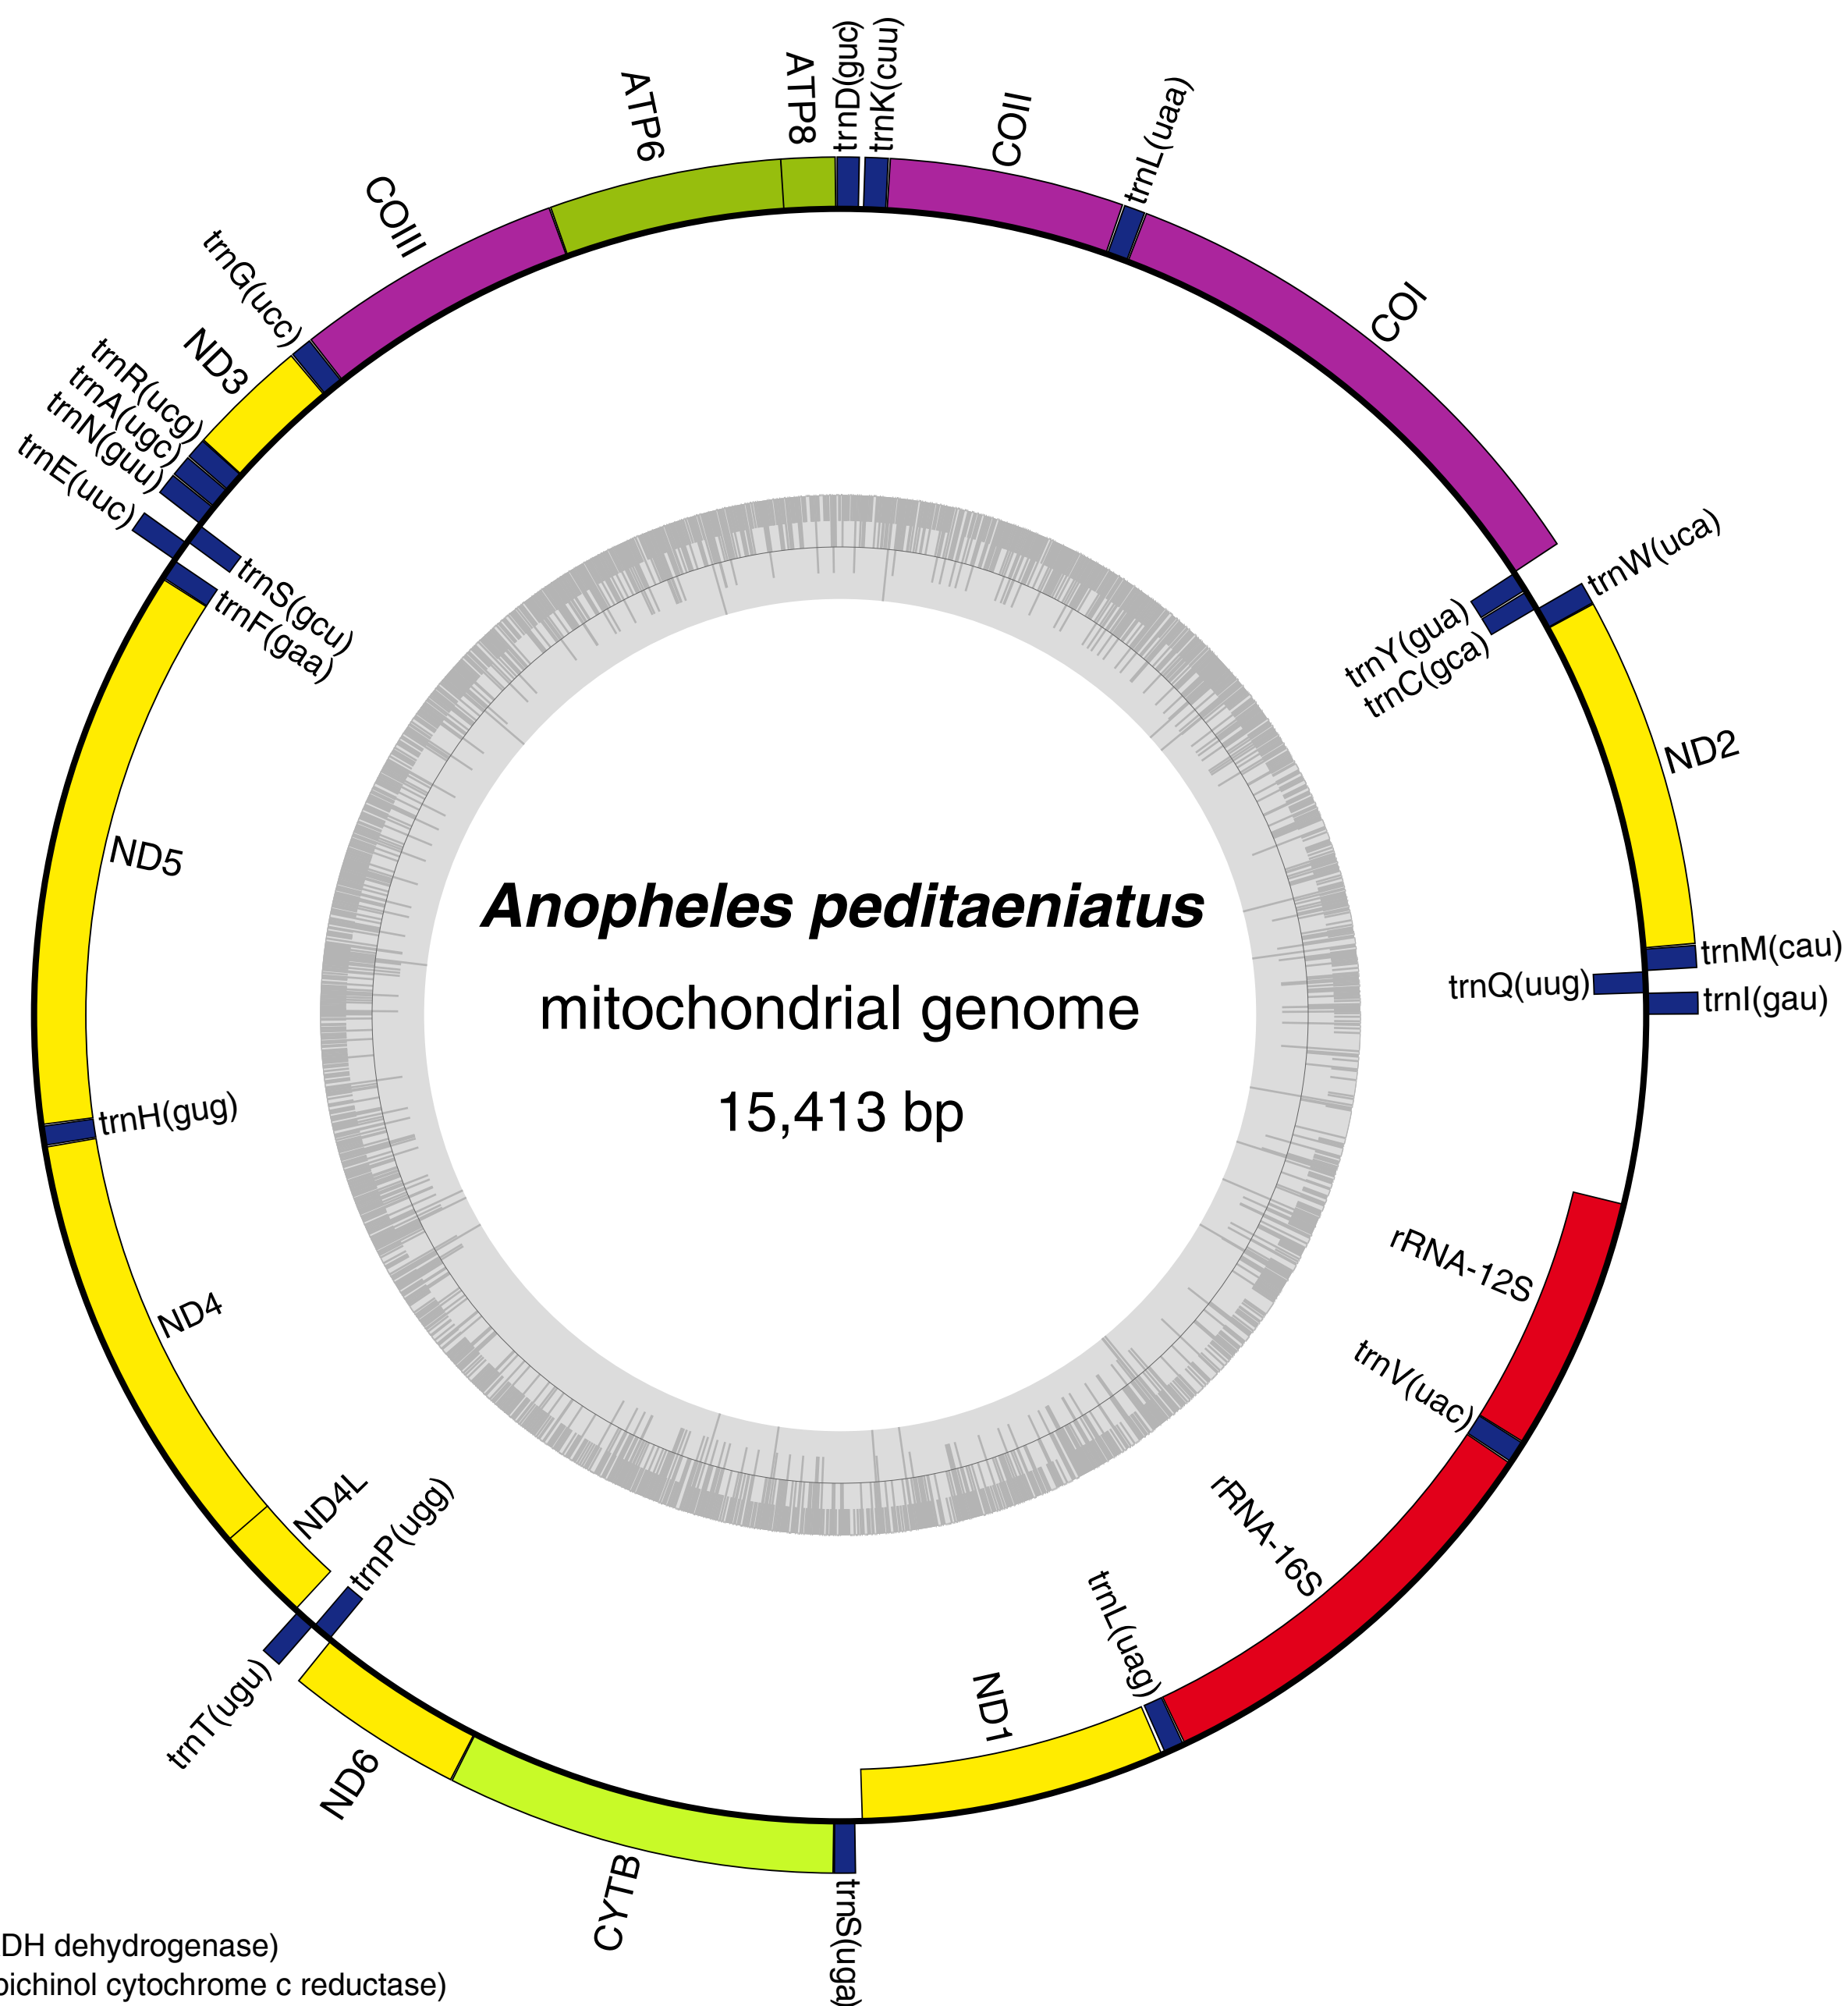

- complex I (NADH dehydrogenase)
- complex III (ubichinol cytochrome c reductase)
- ATP synthase
- other genes
- transfer RNAs
- ribosomal RNAs

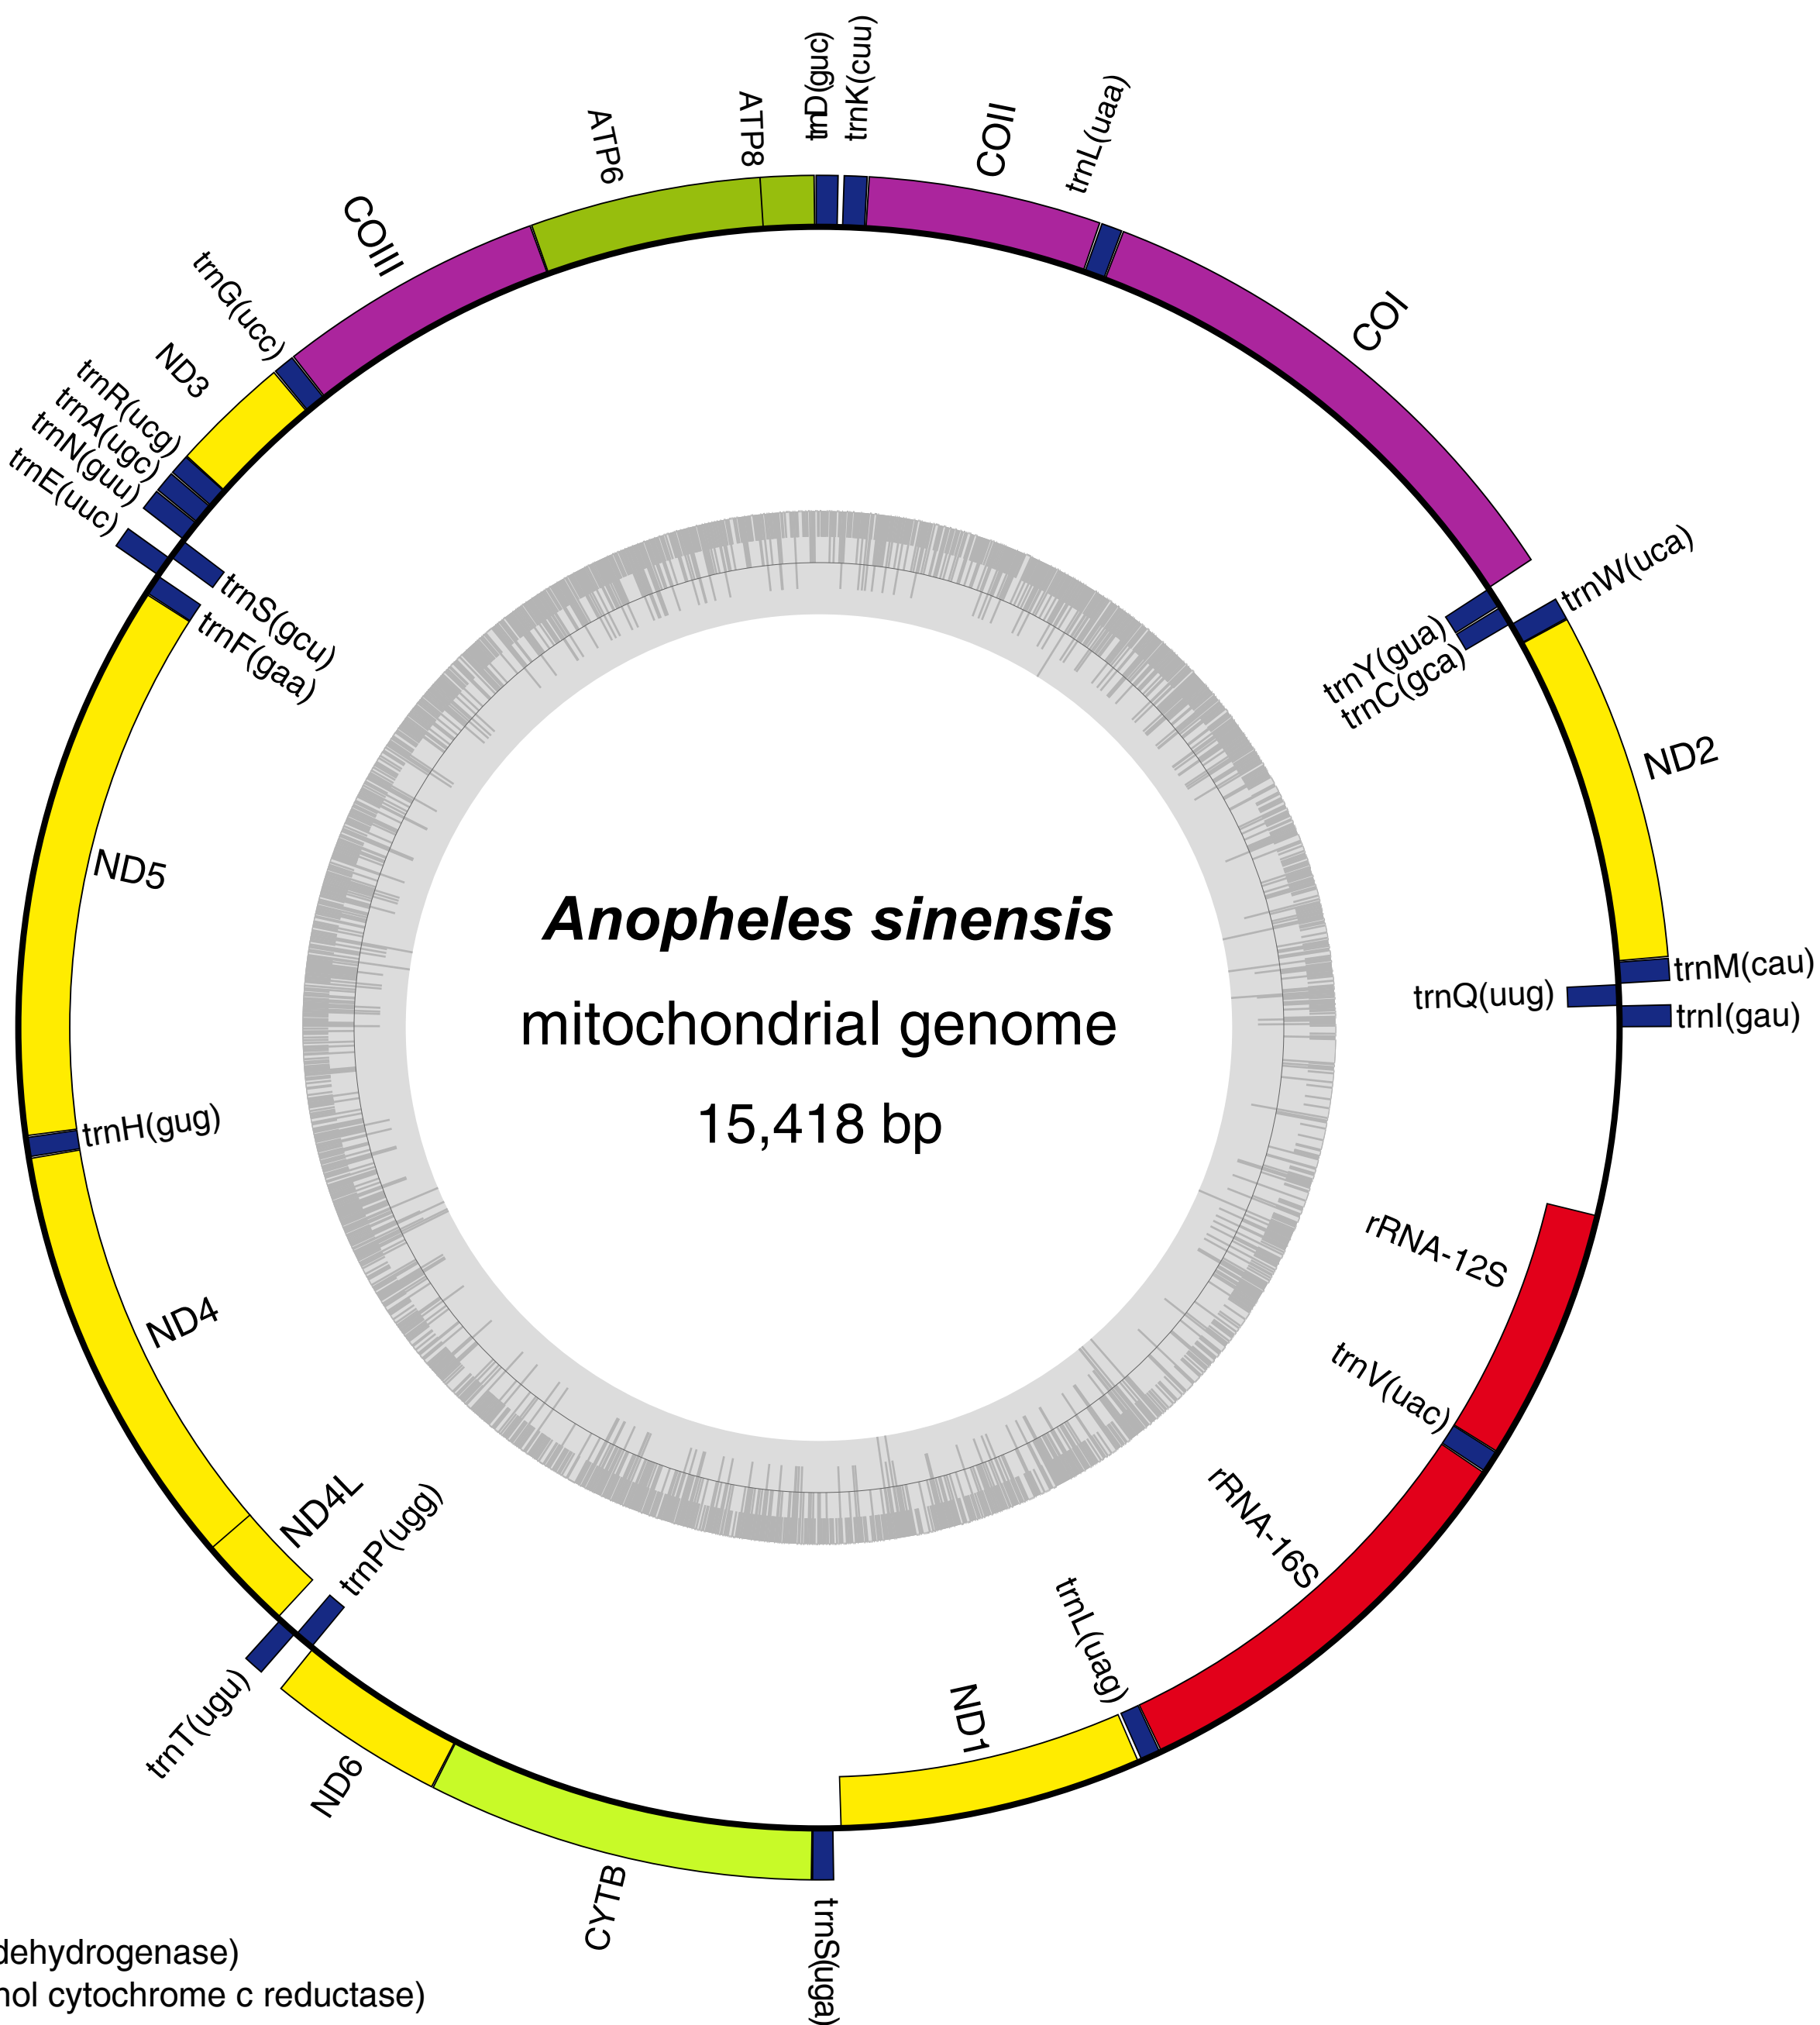

- complex I (NADH dehydrogenase)
- complex III (ubiquinol cytochrome c reductase)
- ATP synthase
- other genes
- transfer RNAs
- ribosomal RNAs



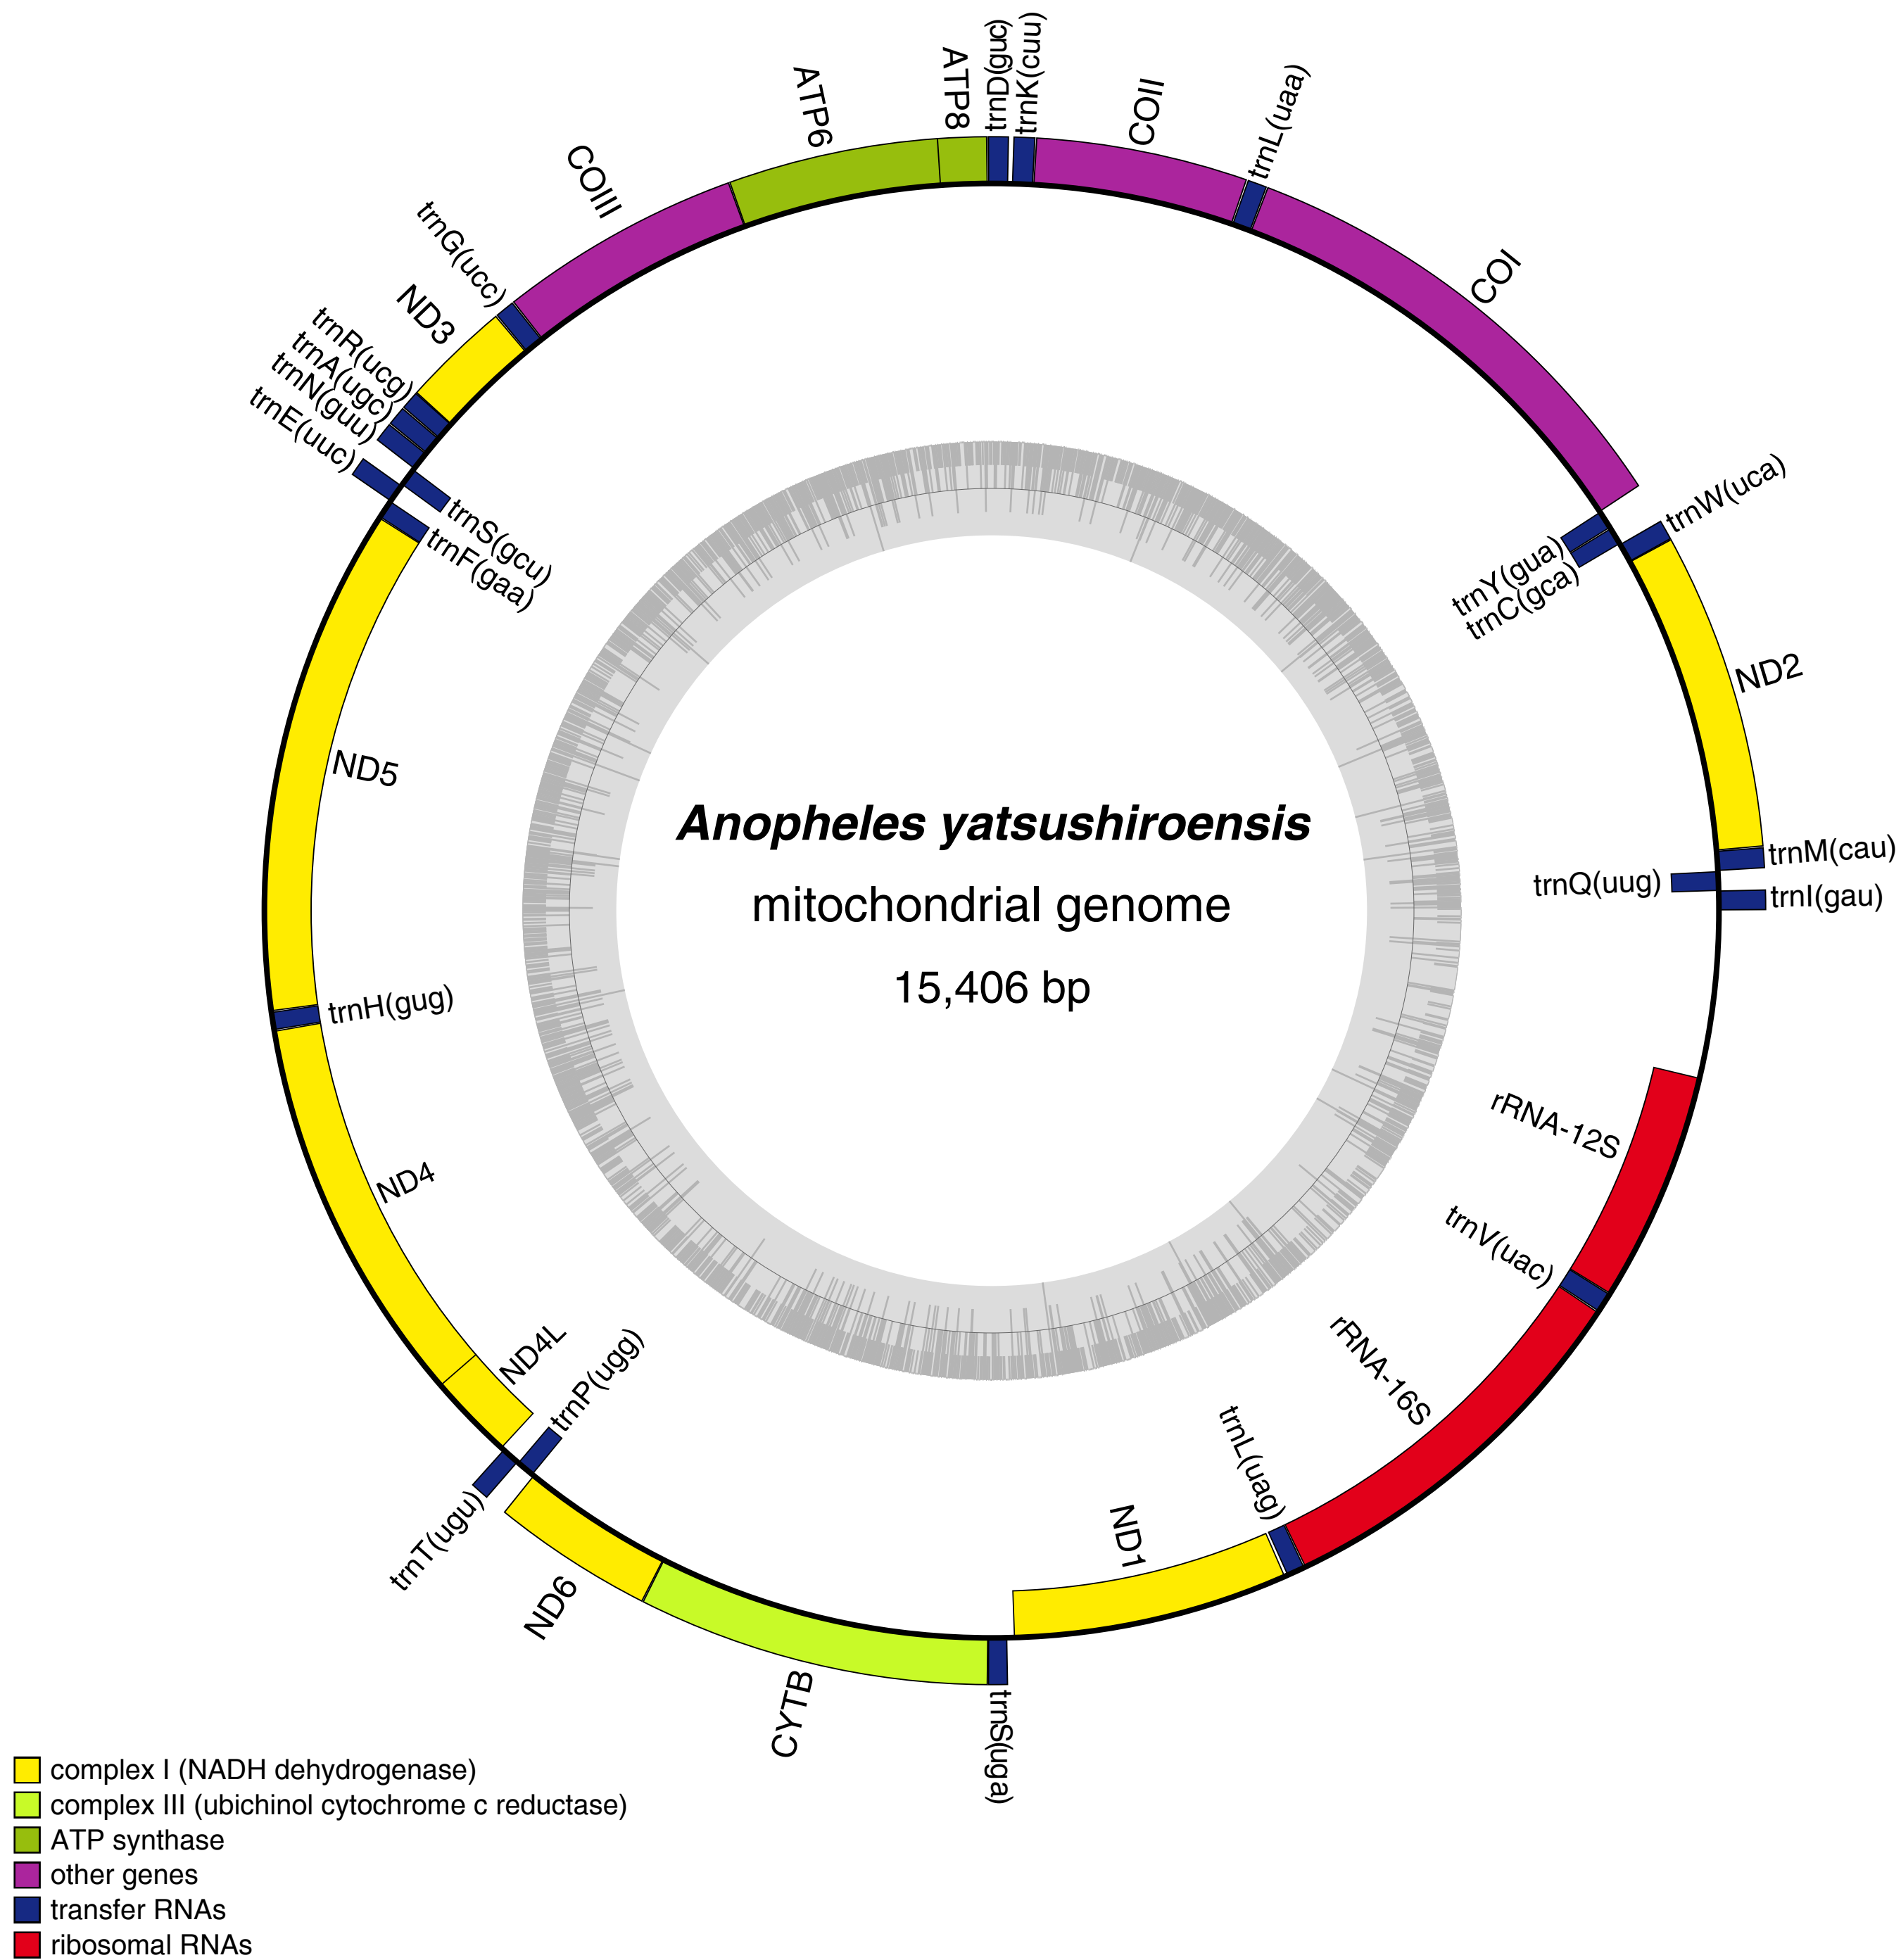

Supplement: s1 [file s1]
