# Supplementary material for: Phylogenetic Analysis of Some Species of the Anopheles hyrcanus Group (Diptera: Culicidae) in China Based on Complete Mitochondrial Genomes
Source: MDPI journal article supplement (doi:10.3390/genes14071453), 2023-07-16
Supplement: s1 [file s1]

**Table S1.** Collection and sequencing information of *Anopheles lesteri* in this study

| Species                   | Collection site                       | Year | Coordinate        | Row data reads | Clean data reads | Mapping reads | Mean depth |
|---------------------------|---------------------------------------|------|-------------------|----------------|------------------|---------------|------------|
| <i>An. lesteri</i> ( I )  | Pujiang City, Sichuan Province, China | 2006 | 103.51°E, 30.20°N | 57,068,184     | 56,937,040       | 266,795       | 2,553      |
| <i>An. lesteri</i> ( II ) | Pujiang City, Sichuan Province, China | 2006 | 103.51°E, 30.20°N | 93,053,680     | 91,412,210       | 88,693        | 700        |
| <i>An. lesteri</i> (III)  | Pujiang City, Sichuan Province, China | 2007 | 103.51°E, 30.20°N | 100,939,412    | 95,440,544       | 566,272       | 4,975      |

**Table S2.** Composition of mitochondrial genome obtained in this study

| Species                    | Length(bp) | A%    | T%    | G%    | C%    | A+T%  | A-T skew | G-C skew |
|----------------------------|------------|-------|-------|-------|-------|-------|----------|----------|
| Whole Mitogenome           |            |       |       |       |       |       |          |          |
| <i>An. belenrae</i>        | 15,418     | 40.19 | 38.05 | 9.20  | 12.56 | 78.23 | 0.027    | -0.154   |
| <i>An. crawfordi</i>       | 15,421     | 40.33 | 38.07 | 9.12  | 12.48 | 78.41 | 0.029    | -0.156   |
| <i>An. junlianensis</i>    | 15,407     | 40.11 | 38.04 | 9.20  | 12.65 | 78.15 | 0.026    | -0.158   |
| <i>An. kleini</i>          | 15,416     | 40.13 | 38.13 | 9.24  | 12.50 | 78.26 | 0.026    | -0.150   |
| <i>An. kunmingensis</i>    | 15,403     | 40.23 | 37.95 | 9.15  | 12.67 | 78.17 | 0.029    | -0.161   |
| <i>An. lesteri</i>         | 15,405     | 40.27 | 38.00 | 9.15  | 12.58 | 78.27 | 0.029    | -0.158   |
| <i>An. liangshanensis</i>  | 15,475     | 40.12 | 38.03 | 9.20  | 12.65 | 78.15 | 0.027    | -0.158   |
| <i>An. peditaeniatus</i>   | 15,413     | 40.36 | 37.90 | 9.17  | 12.57 | 78.26 | 0.031    | -0.157   |
| <i>An. sinensis</i>        | 15,418     | 40.17 | 38.10 | 9.22  | 12.50 | 78.28 | 0.026    | -0.151   |
| <i>An. yatsushiroensis</i> | 15,406     | 40.10 | 38.04 | 9.22  | 12.64 | 78.14 | 0.026    | -0.157   |
| PCGs                       |            |       |       |       |       |       |          |          |
| <i>An. belenrae</i>        | 11,224     | 33.00 | 43.82 | 12.10 | 11.08 | 76.82 | -0.141   | 0.044    |
| <i>An. crawfordi</i>       | 11,224     | 33.11 | 43.82 | 12.07 | 11.00 | 76.92 | -0.139   | 0.046    |
| <i>An. junlianensis</i>    | 11,224     | 32.93 | 43.79 | 12.27 | 11.01 | 76.72 | -0.142   | 0.054    |
| <i>An. kleini</i>          | 11,224     | 32.96 | 43.95 | 12.13 | 10.97 | 76.91 | -0.143   | 0.050    |
| <i>An. kunmingensis</i>    | 11,224     | 32.89 | 43.80 | 12.26 | 11.05 | 76.69 | -0.142   | 0.052    |
| <i>An. lesteri</i>         | 11,224     | 32.98 | 43.79 | 12.23 | 10.99 | 76.77 | -0.141   | 0.053    |
| <i>An. liangshanensis</i>  | 11,224     | 32.76 | 43.76 | 12.33 | 11.15 | 76.52 | -0.144   | 0.050    |
| <i>An. peditaeniatus</i>   | 11,224     | 32.99 | 43.86 | 12.06 | 11.08 | 76.85 | -0.141   | 0.042    |
| <i>An. sinensis</i>        | 11,224     | 32.96 | 43.92 | 12.13 | 10.99 | 76.88 | -0.143   | 0.050    |
| <i>An. yatsushiroensis</i> | 11,224     | 32.97 | 43.78 | 12.25 | 11.00 | 76.75 | -0.141   | 0.054    |
| tRNAs                      |            |       |       |       |       |       |          |          |
| <i>An. belenrae</i>        | 1,476      | 39.50 | 38.82 | 12.47 | 9.21  | 78.32 | 0.009    | 0.150    |
| <i>An. crawfordi</i>       | 1,476      | 39.36 | 38.82 | 12.40 | 9.42  | 78.18 | 0.007    | 0.137    |
| <i>An. junlianensis</i>    | 1,475      | 39.46 | 38.85 | 12.41 | 9.29  | 78.31 | 0.008    | 0.144    |
| <i>An. kleini</i>          | 1,475      | 39.39 | 38.71 | 12.54 | 9.36  | 78.10 | 0.009    | 0.146    |
| <i>An. kunmingensis</i>    | 1,474      | 39.62 | 38.81 | 12.35 | 9.23  | 78.43 | 0.010    | 0.145    |
| <i>An. lesteri</i>         | 1,476      | 39.50 | 38.69 | 12.40 | 9.42  | 78.18 | 0.010    | 0.137    |
| <i>An. liangshanensis</i>  | 1,474      | 39.69 | 38.81 | 12.28 | 9.23  | 78.49 | 0.011    | 0.142    |
| <i>An. peditaeniatus</i>   | 1,475      | 39.53 | 38.64 | 12.54 | 9.29  | 78.17 | 0.011    | 0.149    |
| <i>An. sinensis</i>        | 1,476      | 39.43 | 38.75 | 12.53 | 9.28  | 78.18 | 0.009    | 0.149    |
| <i>An. yatsushiroensis</i> | 1,475      | 39.46 | 38.64 | 12.41 | 9.49  | 78.10 | 0.010    | 0.133    |
| rRNAs                      |            |       |       |       |       |       |          |          |
| <i>An. belenrae</i>        | 2,122      | 38.36 | 43.03 | 12.06 | 6.55  | 81.39 | -0.057   | 0.296    |
| <i>An. crawfordi</i>       | 2,123      | 38.72 | 43.05 | 11.73 | 6.50  | 81.77 | -0.053   | 0.287    |
| <i>An. junlianensis</i>    | 2,122      | 38.22 | 43.12 | 12.16 | 6.50  | 81.34 | -0.060   | 0.303    |
| <i>An. kleini</i>          | 2,122      | 38.36 | 42.98 | 12.06 | 6.60  | 81.34 | -0.057   | 0.293    |
| <i>An. kunmingensis</i>    | 2,122      | 38.45 | 42.98 | 12.02 | 6.55  | 81.43 | -0.056   | 0.294    |
| <i>An. lesteri</i>         | 2,123      | 38.62 | 43.01 | 11.82 | 6.55  | 81.63 | -0.054   | 0.287    |
| <i>An. liangshanensis</i>  | 2,123      | 38.34 | 43.10 | 12.01 | 6.55  | 81.44 | -0.058   | 0.294    |

|                            |       |       |       |       |      |       |        |       |
|----------------------------|-------|-------|-------|-------|------|-------|--------|-------|
| <i>An. peditaeniatus</i>   | 2,122 | 37.98 | 43.26 | 12.16 | 6.60 | 81.24 | -0.065 | 0.296 |
| <i>An. sinensis</i>        | 2,122 | 38.36 | 43.03 | 12.06 | 6.55 | 81.39 | -0.057 | 0.296 |
| <i>An. yatsushiroensis</i> | 2,122 | 38.22 | 43.07 | 12.16 | 6.55 | 81.29 | -0.060 | 0.300 |

---
