# Supplementary material for: Phylogenetic Analysis of Some Species of the Anopheles hyrcanus Group (Diptera: Culicidae) in China Based on Complete Mitochondrial Genomes
Source: MDPI journal article supplement (doi:10.3390/genes14071453), 2023-07-16
Supplement: s1 [file s1]

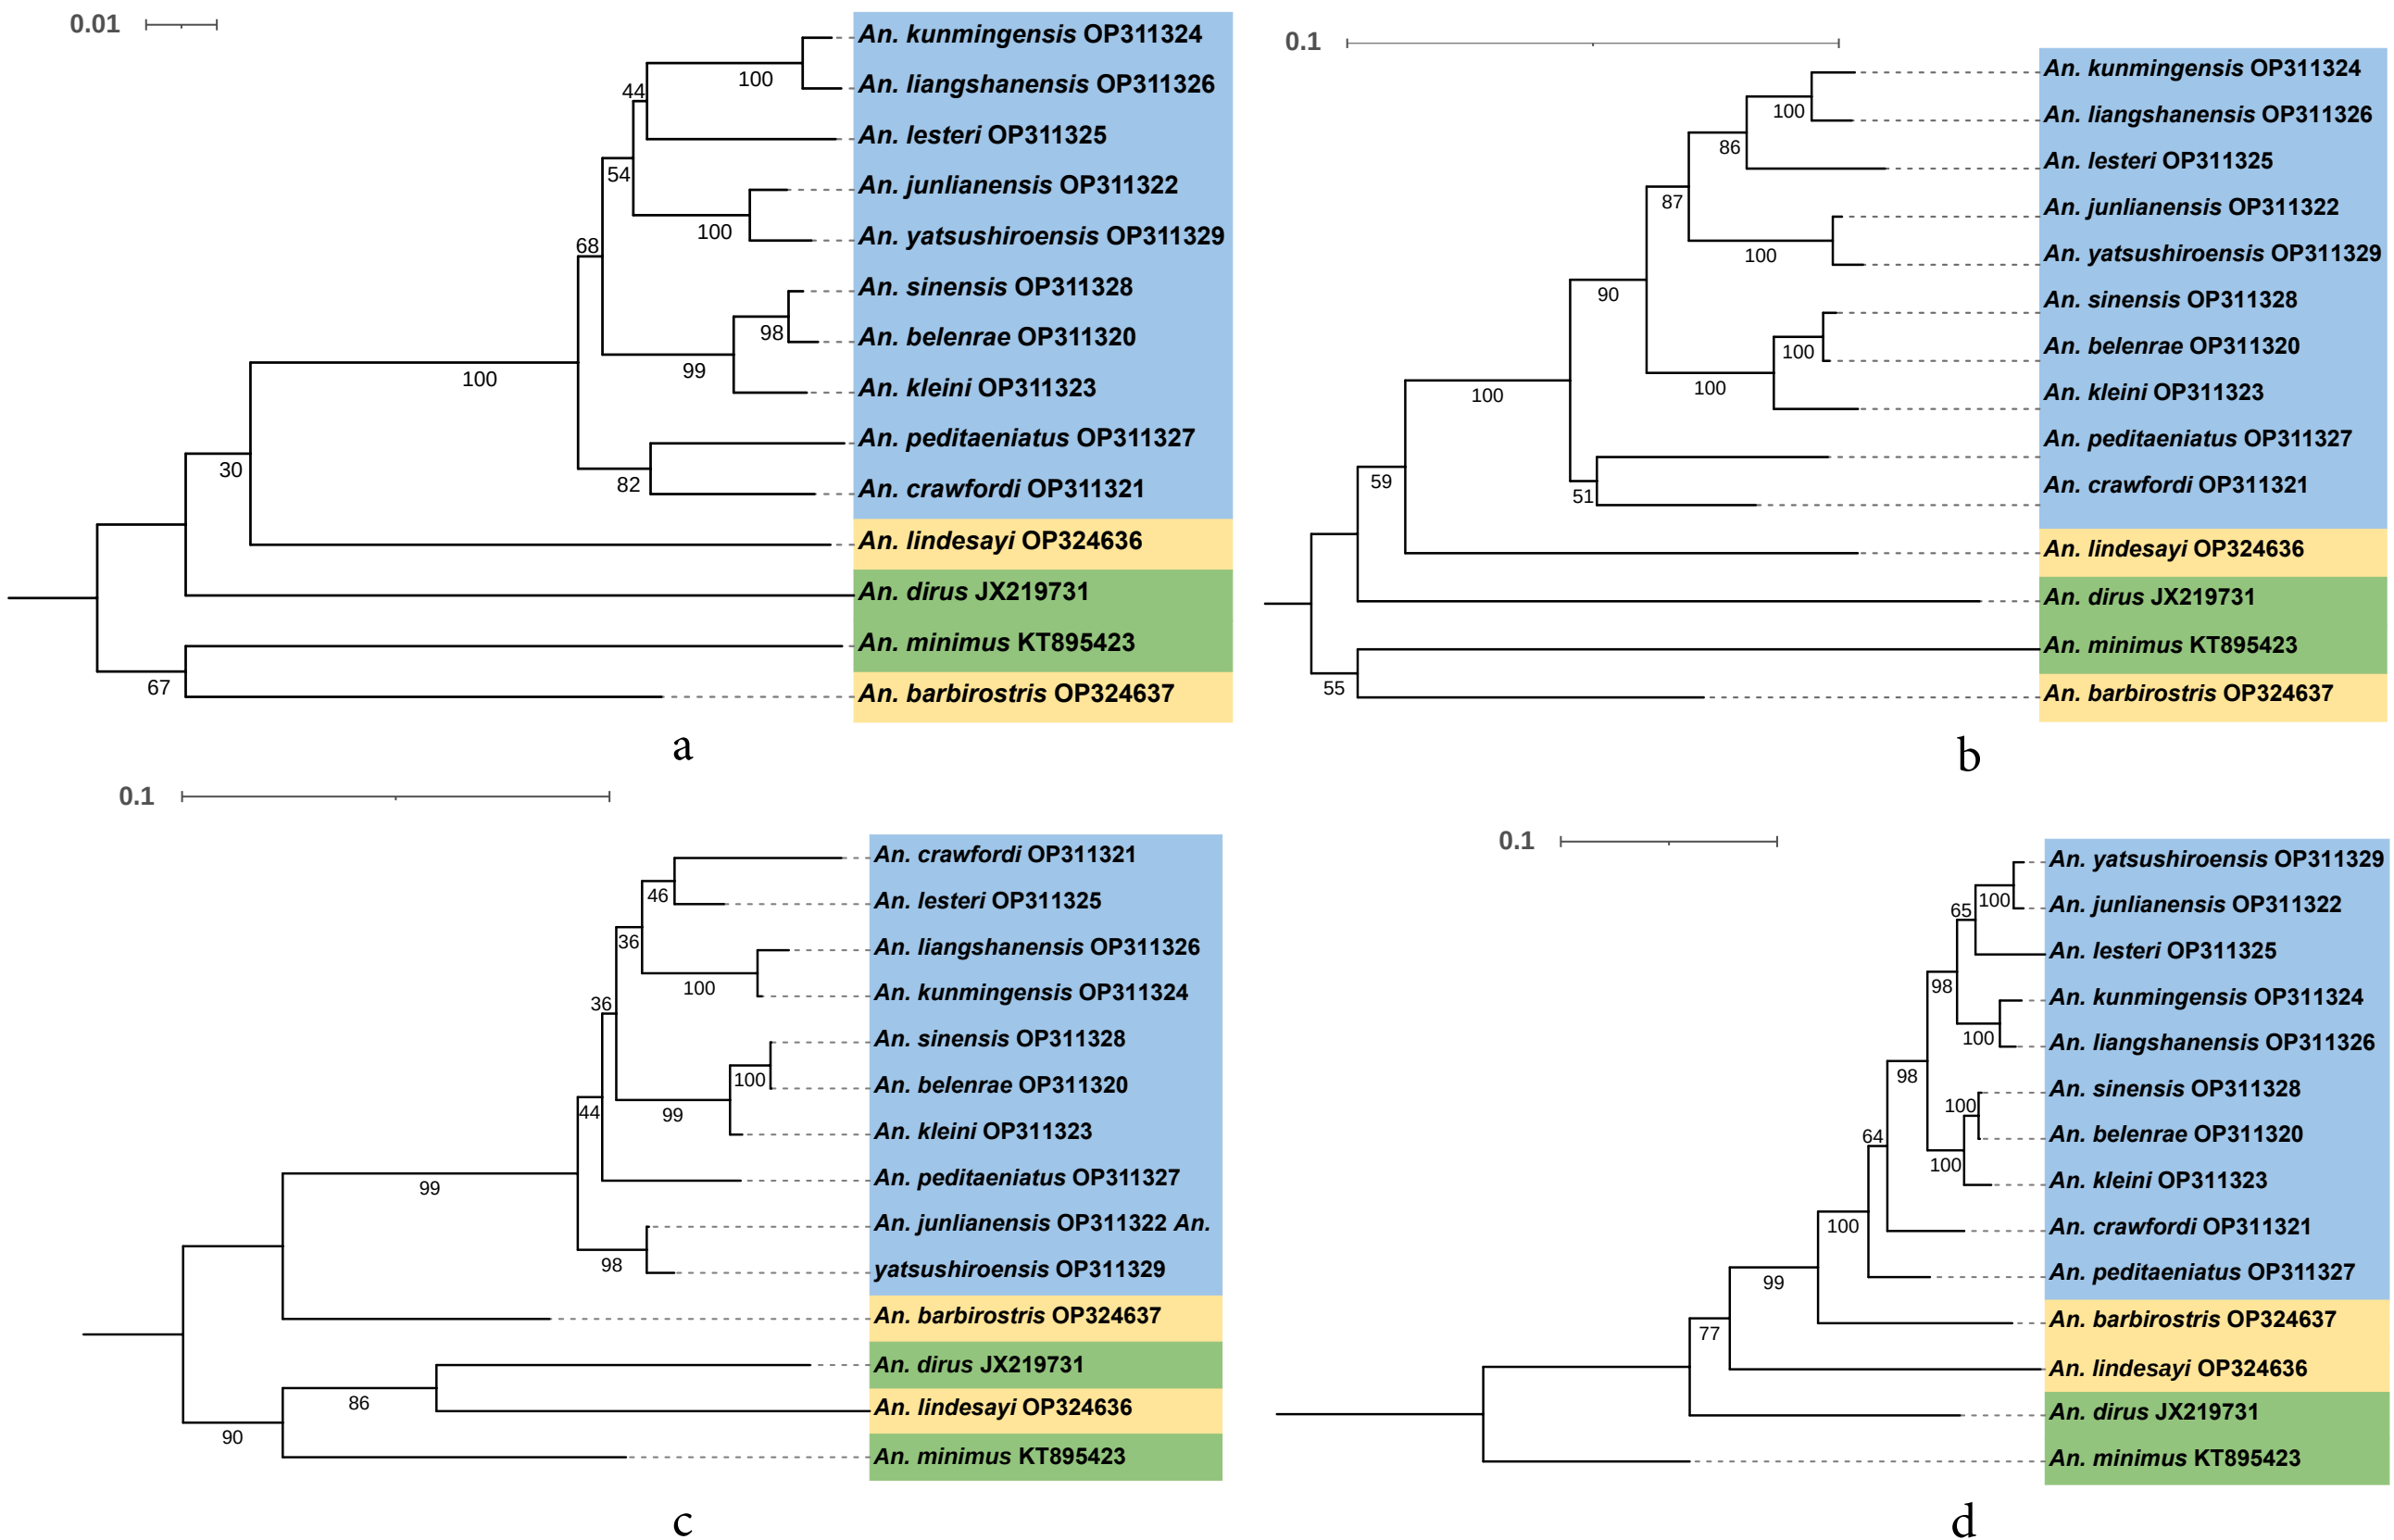

Fig. S4 Phylogenetic reconstruction by maximum likelihood based on single subunits concatenated of the species sequenced in this study and two other taxa with data available from GenBank. a COI subunit b ND4 subunit c COII subunit d ND5 subunit. The values of bootstrapping support are shown to the left of the branch point.
